# Supplementary material
Source: HighWire-hosted journal article supplement (https://ard.bmj.com/content/79/9/1218)
Supplement: inline-supplementary-material-2 [file inline-supplementary-material-2.xlsx]

## Sheet: Replicated Genes
Gene	Biotype	Gene Name	Gene Symbol	logFC	AveExpr	t	P.Value	adj.P.Val	B	|FC| > 1.5	q <0.05	Significant	Replicated
ENSG00000240137	antisense	ERICH6 antisense RNA 1 Source	ERICH6-AS1	-0.652289	-0.0322167	-4.67702	5.27e-06	0.00243154	3.79721	Yes	Yes	Yes	Yes
ENSG00000266923	antisense	novel transcript, antisense to CLLU1OS	AC063949.2	-0.595443	2.39239	-3.5581	0.000463876	0.0133767	-0.224354	Yes	Yes	Yes	Yes
ENSG00000204466	known_processed_transcript	Diacylglycerol kinase, kappa	DGKK	-0.955655	0.899509	-3.44584	0.000690233	0.0153688	-0.57581	Yes	Yes	Yes	Yes
ENSG00000205056	lincRNA	long intergenic non-protein coding RNA 2397 Source	LINC02397	-0.918667	1.22487	-4.35454	2.1e-05	0.00363865	2.54501	Yes	Yes	Yes	Yes
ENSG00000234184	lincRNA	long intergenic non-protein coding RNA 1781 Source	LINC01781	-0.978358	0.547621	-4.68259	5.14e-06	0.00243154	3.81946	Yes	Yes	Yes	Yes
ENSG00000235621	lincRNA	long intergenic non-protein coding RNA 494 Source	LINC00494	-1.03412	1.0276	-5.87536	1.68e-08	0.000221394	9.04346	Yes	Yes	Yes	Yes
ENSG00000247982	lincRNA	long intergenic non-protein coding RNA 926 Source	LINC00926	-0.65162	4.75119	-3.67227	0.000306572	0.0112289	0.143201	Yes	Yes	Yes	Yes
ENSG00000260655	lincRNA	CTA-250D10.23	CTA-250D10.23	-0.65087	3.07224	-3.97163	9.87e-05	0.00684094	1.15443	Yes	Yes	Yes	Yes
ENSG00000256720	processed_pseudogene	BTG anti-proliferation factor 1 pseudogene 1 Source	BTG1P1	-0.639794	-0.281297	-3.5594	0.000461718	0.0133658	-0.220221	Yes	Yes	Yes	Yes
ENSG00000130600	processed_transcript	H19, imprinted maternally expressed transcript Source	H19	1.32231	-0.697345	4.84851	2.45e-06	0.00180945	4.49213	Yes	Yes	Yes	Yes
ENSG00000002745	protein_coding	Wnt family member 16 Source	WNT16	-0.880241	-0.294553	-3.42165	0.000750962	0.0158953	-0.650217	Yes	Yes	Yes	Yes
ENSG00000030419	protein_coding	IKAROS family zinc finger 2 Source	IKZF2	-0.649358	4.11383	-4.91564	1.81e-06	0.00171489	4.76946	Yes	Yes	Yes	Yes
ENSG00000037280	protein_coding	fms related tyrosine kinase 4 Source	FLT4	-0.599718	1.79111	-3.69843	0.00027843	0.0107317	0.228823	Yes	Yes	Yes	Yes
ENSG00000062524	protein_coding	leukocyte receptor tyrosine kinase Source	LTK	-0.59046	2.55285	-3.82337	0.000174515	0.00909201	0.645101	Yes	Yes	Yes	Yes
ENSG00000074527	protein_coding	netrin 4 Source	NTN4	-0.791165	0.026026	-3.40981	0.000782479	0.0161197	-0.68647	Yes	Yes	Yes	Yes
ENSG00000081052	protein_coding	collagen type IV alpha 4 chain Source	COL4A4	-1.04017	0.57788	-5.76865	2.91e-08	0.000221394	8.54113	Yes	Yes	Yes	Yes
ENSG00000082438	protein_coding	cordon-bleu WH2 repeat protein like 1 Source	COBLL1	-0.684711	3.24288	-4.74315	3.93e-06	0.00220784	4.06284	Yes	Yes	Yes	Yes
ENSG00000088827	protein_coding	sialic acid binding Ig like lectin 1 Source	SIGLEC1	0.850115	3.73704	3.64306	0.000341162	0.0115081	0.0482093	Yes	Yes	Yes	Yes
ENSG00000091129	protein_coding	neuronal cell adhesion molecule Source	NRCAM	-0.903932	0.323435	-3.40934	0.00078378	0.0161247	-0.687935	Yes	Yes	Yes	Yes
ENSG00000100473	protein_coding	cochlin Source	COCH	-0.691009	1.56318	-3.66668	0.00031293	0.0112289	0.124956	Yes	Yes	Yes	Yes
ENSG00000100985	protein_coding	matrix metallopeptidase 9 Source	MMP9	0.751545	6.69209	3.65435	0.000327387	0.0115081	0.0848231	Yes	Yes	Yes	Yes
ENSG00000101425	protein_coding	bactericidal permeability increasing protein Source	BPI	0.721831	3.69897	3.3934	0.000828234	0.0168796	-0.736559	Yes	Yes	Yes	Yes
ENSG00000103647	protein_coding	coronin 2B Source	CORO2B	-0.740291	0.708709	-3.01156	0.00292528	0.0323181	-1.84032	Yes	Yes	Yes	Yes
ENSG00000106686	protein_coding	spermatogenesis associated 6 like Source	SPATA6L	-0.630031	-0.52703	-3.29566	0.00115663	0.020124	-1.03032	Yes	Yes	Yes	Yes
ENSG00000108797	protein_coding	contactin associated protein 1 Source	CNTNAP1	-0.654893	2.07513	-5.17245	5.47e-07	0.00138882	5.85754	Yes	Yes	Yes	Yes
ENSG00000110318	protein_coding	centrosomal protein 126 Source	CEP126	-0.620565	1.68223	-4.82487	2.73e-06	0.00188767	4.39515	Yes	Yes	Yes	Yes
ENSG00000114948	protein_coding	ADAM metallopeptidase domain 23 Source	ADAM23	-0.660133	1.35124	-3.4433	0.000696367	0.0153973	-0.58362	Yes	Yes	Yes	Yes
ENSG00000117281	protein_coding	CD160 molecule Source	CD160	-0.6968	3.81627	-4.52591	1.02e-05	0.00309741	3.20147	Yes	Yes	Yes	Yes
ENSG00000119917	protein_coding	interferon induced protein with tetratricopeptide repeats 3 Source	IFIT3	0.599253	7.2181	3.13488	0.00197094	0.0265771	-1.49681	Yes	Yes	Yes	Yes
ENSG00000123095	protein_coding	basic helix-loop-helix family member e41 Source	BHLHE41	-0.75476	1.14133	-4.48846	1.19e-05	0.00310253	3.05624	Yes	Yes	Yes	Yes
ENSG00000123096	protein_coding	sarcospan Source	SSPN	-0.72246	0.281907	-4.14148	5.04e-05	0.00508912	1.75808	Yes	Yes	Yes	Yes
ENSG00000123219	protein_coding	centromere protein K Source	CENPK	-0.600139	2.37715	-3.17945	0.00170375	0.0246888	-1.36962	Yes	Yes	Yes	Yes
ENSG00000126709	protein_coding	interferon alpha inducible protein 6 Source	IFI6	0.692073	5.39653	3.46172	0.000652889	0.0151026	-0.526697	Yes	Yes	Yes	Yes
ENSG00000127990	protein_coding	sarcoglycan epsilon Source	SGCE	-0.690547	-0.524848	-3.49698	0.00057662	0.0143219	-0.416918	Yes	Yes	Yes	Yes
ENSG00000132185	protein_coding	Fc receptor like A Source	FCRLA	-0.662324	4.68524	-4.26386	3.06e-05	0.00404618	2.20609	Yes	Yes	Yes	Yes
ENSG00000132704	protein_coding	Fc receptor like 2 Source	FCRL2	-0.719927	3.7266	-4.24796	3.27e-05	0.00415457	2.14729	Yes	Yes	Yes	Yes
ENSG00000134121	protein_coding	cell adhesion molecule L1 like Source	CHL1	-0.882753	-1.06772	-3.27664	0.00123325	0.0208612	-1.08662	Yes	Yes	Yes	Yes
ENSG00000134321	protein_coding	radical S-adenosyl methionine domain containing 2 Source	RSAD2	0.949501	5.13246	3.30509	0.00112034	0.0199486	-1.00232	Yes	Yes	Yes	Yes
ENSG00000134326	protein_coding	cytidine/uridine monophosphate kinase 2 Source	CMPK2	0.674546	4.23192	3.20662	0.00155773	0.0235033	-1.29126	Yes	Yes	Yes	Yes
ENSG00000135318	protein_coding	5'-nucleotidase ecto Source	NT5E	-0.586241	3.42678	-3.86416	0.000149445	0.00817451	0.783584	Yes	Yes	Yes	Yes
ENSG00000136573	protein_coding	BLK proto-oncogene, Src family tyrosine kinase Source	BLK	-0.615702	4.52841	-4.54033	9.56e-06	0.00303232	3.25764	Yes	Yes	Yes	Yes
ENSG00000137959	protein_coding	interferon induced protein 44 like Source	IFI44L	0.858267	4.76978	3.41938	0.000756927	0.0159026	-0.657195	Yes	Yes	Yes	Yes
ENSG00000137965	protein_coding	interferon induced protein 44 Source	IFI44	0.679622	5.2674	3.69971	0.000277112	0.0107317	0.233045	Yes	Yes	Yes	Yes
ENSG00000139572	protein_coding	G protein-coupled receptor 84 Source	GPR84	0.585199	1.05359	4.20676	3.87e-05	0.00461407	1.99569	Yes	Yes	Yes	Yes
ENSG00000144290	protein_coding	solute carrier family 4 member 10 Source	SLC4A10	-1.09846	2.33468	-4.24554	3.3e-05	0.00415457	2.13833	Yes	Yes	Yes	Yes
ENSG00000144645	protein_coding	oxysterol binding protein like 10 Source	OSBPL10	-0.752407	3.2414	-4.99645	1.25e-06	0.00159478	5.10728	Yes	Yes	Yes	Yes
ENSG00000144824	protein_coding	pleckstrin homology like domain family B member 2 Source	PHLDB2	-0.602304	2.72112	-4.4019	1.72e-05	0.00350937	2.72438	Yes	Yes	Yes	Yes
ENSG00000147180	protein_coding	zinc finger protein 711 Source	ZNF711	-0.736532	0.44823	-4.09546	6.06e-05	0.00555648	1.5924	Yes	Yes	Yes	Yes
ENSG00000148600	protein_coding	cadherin related family member 1 Source	CDHR1	-0.655746	1.53101	-4.95853	1.48e-06	0.00171489	4.94822	Yes	Yes	Yes	Yes
ENSG00000148848	protein_coding	ADAM metallopeptidase domain 12 Source	ADAM12	-0.686954	0.723444	-3.70404	0.00027272	0.0107317	0.24726	Yes	Yes	Yes	Yes
ENSG00000149131	protein_coding	serpin family G member 1 Source	SERPING1	0.619798	4.54452	3.0968	0.00222943	0.0282199	-1.60422	Yes	Yes	Yes	Yes
ENSG00000149557	protein_coding	fasciculation and elongation protein zeta 1 Source	FEZ1	-0.63336	1.82227	-4.12238	5.44e-05	0.00527533	1.68912	Yes	Yes	Yes	Yes
ENSG00000150625	protein_coding	glycoprotein M6A Source	GPM6A	-0.833654	-0.482708	-2.86872	0.00455183	0.0406822	-2.22248	Yes	Yes	Yes	Yes
ENSG00000152766	protein_coding	ankyrin repeat domain 22 Source	ANKRD22	0.645007	1.78788	3.64049	0.000344386	0.0115081	0.0398566	Yes	Yes	Yes	Yes
ENSG00000152894	protein_coding	protein tyrosine phosphatase, receptor type K Source	PTPRK	-0.61565	2.0842	-4.06881	6.74e-05	0.00586255	1.4972	Yes	Yes	Yes	Yes
ENSG00000153064	protein_coding	B cell scaffold protein with ankyrin repeats 1 Source	BANK1	-0.592285	5.60259	-4.26065	3.1e-05	0.00404618	2.19421	Yes	Yes	Yes	Yes
ENSG00000154734	protein_coding	ADAM metallopeptidase with thrombospondin type 1 motif 1 Source	ADAMTS1	-0.743209	2.05907	-4.28552	2.8e-05	0.00394872	2.28653	Yes	Yes	Yes	Yes
ENSG00000155974	protein_coding	glutamate receptor interacting protein 1 Source	GRIP1	-0.847545	-0.165767	-3.9655	0.000101115	0.00687221	1.13305	Yes	Yes	Yes	Yes
ENSG00000156453	protein_coding	protocadherin 1 Source	PCDH1	-0.804229	1.06376	-4.31116	2.52e-05	0.00379244	2.38216	Yes	Yes	Yes	Yes
ENSG00000156738	protein_coding	membrane spanning 4-domains A1 Source	MS4A1	-0.612324	6.77093	-3.973	9.82e-05	0.00684094	1.1592	Yes	Yes	Yes	Yes
ENSG00000157601	protein_coding	MX dynamin like GTPase 1 Source	MX1	0.618036	7.04742	3.23991	0.00139466	0.022071	-1.19445	Yes	Yes	Yes	Yes
ENSG00000159958	protein_coding	TNF receptor superfamily member 13C Source	TNFRSF13C	-0.71455	1.63707	-4.54411	9.41e-06	0.00303232	3.27237	Yes	Yes	Yes	Yes
ENSG00000162630	protein_coding	beta-1,3-galactosyltransferase 2 Source	B3GALT2	-0.681856	1.14673	-3.77091	0.000212638	0.00985934	0.468873	Yes	Yes	Yes	Yes
ENSG00000163534	protein_coding	Fc receptor like 1 Source	FCRL1	-0.688252	4.7068	-3.75398	0.00022654	0.00992578	0.412437	Yes	Yes	Yes	Yes
ENSG00000163701	protein_coding	interleukin 17 receptor E Source	IL17RE	-0.793258	-0.369098	-4.05851	7.02e-05	0.0059352	1.46052	Yes	Yes	Yes	Yes
ENSG00000164047	protein_coding	cathelicidin antimicrobial peptide Source	CAMP	0.674196	3.44722	3.11941	0.00207245	0.0273661	-1.54061	Yes	Yes	Yes	Yes
ENSG00000164330	protein_coding	EBF transcription factor 1 Source	EBF1	-0.665931	1.93977	-3.94724	0.000108551	0.00718515	1.06951	Yes	Yes	Yes	Yes
ENSG00000165338	protein_coding	HECT domain E3 ubiquitin protein ligase 2 Source	HECTD2	-0.655411	-0.334715	-3.75159	0.000228575	0.00992578	0.404471	Yes	Yes	Yes	Yes
ENSG00000165810	protein_coding	butyrophilin like 9 Source	BTNL9	-0.855973	-1.09464	-3.11729	0.00208672	0.0274628	-1.54659	Yes	Yes	Yes	Yes
ENSG00000165949	protein_coding	interferon alpha inducible protein 27 Source	IFI27	0.955226	0.927565	2.86807	0.00456076	0.0406822	-2.22417	Yes	Yes	Yes	Yes
ENSG00000167633	protein_coding	killer cell immunoglobulin like receptor, three Ig domains and long cytoplasmic tail 1 Source	KIR3DL1	-0.621518	2.62259	-3.00941	0.00294518	0.0324518	-1.8462	Yes	Yes	Yes	Yes
ENSG00000167723	protein_coding	transient receptor potential cation channel subfamily V member 3 Source	TRPV3	-0.670374	-0.427681	-3.49107	0.000588804	0.0144347	-0.435406	Yes	Yes	Yes	Yes
ENSG00000168062	protein_coding	basic leucine zipper ATF-like transcription factor 2 Source	BATF2	0.616319	2.78843	3.05516	0.00254768	0.0301366	-1.72032	Yes	Yes	Yes	Yes
ENSG00000169031	protein_coding	collagen type IV alpha 3 chain Source	COL4A3	-1.17134	0.527	-5.561	8.29e-08	0.000420542	7.58234	Yes	Yes	Yes	Yes
ENSG00000169744	protein_coding	LIM domain binding 2 Source	LDB2	-0.705534	-0.685064	-3.22087	0.0014859	0.0228037	-1.24995	Yes	Yes	Yes	Yes
ENSG00000170866	protein_coding	Leukocyte immunoglobulin-like receptor, subfamily A (without TM domain), member 3	LILRA3	0.597102	5.68635	2.91181	0.00399037	0.0381213	-2.10899	Yes	Yes	Yes	Yes
ENSG00000174469	protein_coding	contactin associated protein like 2 Source	CNTNAP2	-1.13806	1.71495	-3.38783	0.000844309	0.0169575	-0.753495	Yes	Yes	Yes	Yes
ENSG00000174607	protein_coding	UDP glycosyltransferase 8 Source	UGT8	-0.720368	0.212778	-3.28439	0.00120146	0.0206212	-1.0637	Yes	Yes	Yes	Yes
ENSG00000179044	protein_coding	exocyst complex component 3 like 1 Source	EXOC3L1	0.84392	-1.10258	3.52175	0.000528136	0.0139368	-0.339226	Yes	Yes	Yes	Yes
ENSG00000183960	protein_coding	potassium voltage-gated channel subfamily H member 8 Source	KCNH8	-0.961149	0.49158	-4.54806	9.25e-06	0.00303232	3.28781	Yes	Yes	Yes	Yes
ENSG00000184226	protein_coding	protocadherin 9 Source	PCDH9	-0.619934	1.37025	-3.04418	0.0026383	0.0307782	-1.75069	Yes	Yes	Yes	Yes
ENSG00000185745	protein_coding	interferon induced protein with tetratricopeptide repeats 1 Source	IFIT1	0.804818	6.17115	3.28995	0.00117916	0.0203531	-1.04725	Yes	Yes	Yes	Yes
ENSG00000186231	protein_coding	kelch like family member 32 Source	KLHL32	-0.672456	0.0311704	-4.40577	1.7e-05	0.00350937	2.7391	Yes	Yes	Yes	Yes
ENSG00000187608	protein_coding	ISG15 ubiquitin-like modifier Source	ISG15	0.815001	4.37684	3.51092	0.000548851	0.0141522	-0.373267	Yes	Yes	Yes	Yes
ENSG00000188848	protein_coding	BEN domain containing 4 Source	BEND4	-0.64132	1.23709	-3.86353	0.000149809	0.00817451	0.781414	Yes	Yes	Yes	Yes
ENSG00000196159	protein_coding	FAT atypical cadherin 4 Source	FAT4	-0.776889	-0.0896197	-3.30512	0.00112021	0.0199486	-1.00222	Yes	Yes	Yes	Yes
ENSG00000197385	protein_coding	zinc finger protein 860 Source	ZNF860	-0.983992	1.14874	-4.57166	8.35e-06	0.00288933	3.38015	Yes	Yes	Yes	Yes
ENSG00000214279	protein_coding	scavenger receptor family member expressed on T cells 1 Source	SCART1	-0.756156	1.55725	-4.49683	1.15e-05	0.00310253	3.08862	Yes	Yes	Yes	Yes
ENSG00000227051	protein_coding	chromosome 14 open reading frame 132 Source	C14orf132	-0.631654	1.55816	-3.3044	0.00112294	0.0199548	-1.00436	Yes	Yes	Yes	Yes
ENSG00000240505	protein_coding	TNF receptor superfamily member 13B Source	TNFRSF13B	-0.792591	0.803071	-4.18463	4.23e-05	0.00468696	1.91478	Yes	Yes	Yes	Yes
ENSG00000242265	protein_coding	paternally expressed 10 Source	PEG10	-0.694572	1.37778	-4.03503	7.7e-05	0.00624795	1.37726	Yes	Yes	Yes	Yes
ENSG00000257017	protein_coding	haptoglobin Source	HP	1.0118	3.1279	4.46549	1.32e-05	0.00318336	2.96765	Yes	Yes	Yes	Yes
ENSG00000257950	protein_coding	P2RX5-TAX1BP3 readthrough (NMD candidate) Source	P2RX5-TAX1BP3	-0.68639	0.35824	-3.69094	0.000286224	0.0108981	0.204269	Yes	Yes	Yes	Yes
ENSG00000251606	putative_protein_coding	Uncharacterized protein	CTD-2215E18.1	-0.900129	-0.929224	-3.4429	0.000697343	0.0153973	-0.584856	Yes	Yes	Yes	Yes
ENSG00000211803	TR_V_gene	T cell receptor alpha variable 23/delta variable 6 Source	TRAV23DV6	-0.789323	1.63923	-4.10216	5.9e-05	0.00547571	1.61644	Yes	Yes	Yes	Yes
ENSG00000211821	TR_V_gene	T cell receptor delta variable 2 Source	TRDV2	-1.04399	1.4474	-3.10776	0.00215201	0.0277999	-1.57344	Yes	Yes	Yes	Yes
ENSG00000128438	transcribed_unprocessed_pseudogene	TBC1 domain family member 27, pseudogene Source	TBC1D27P	-0.870717	0.659756	-4.32283	2.4e-05	0.00379244	2.42584	Yes	Yes	Yes	Yes
ENSG00000171101	transcribed_unprocessed_pseudogene	sialic acid binding Ig like lectin 17, pseudogene Source	SIGLEC17P	-0.65248	3.11436	-4.88174	2.11e-06	0.00171489	4.62904	Yes	Yes	Yes	Yes
ENSG00000186481	transcribed_unprocessed_pseudogene	ankyrin repeat domain 20 family member A5, pseudogene Source	ANKRD20A5P	-0.642566	0.0397312	-3.24076	0.00139074	0.0220319	-1.19199	Yes	Yes	Yes	Yes

## Sheet: Discovery
Gene	Biotype	Gene Name	Gene Symbol	logFC	AveExpr	t	P.Value	adj.P.Val	B	|FC| > 1.5	q <0.05	Significant	Replicated
ENSG00000240137	antisense	ERICH6 antisense RNA 1 Source	ERICH6-AS1	-0.652289	-0.0322167	-4.67702	5.27e-06	0.00243154	3.79721	Yes	Yes	Yes	Yes
ENSG00000266923	antisense	novel transcript, antisense to CLLU1OS	AC063949.2	-0.595443	2.39239	-3.5581	0.000463876	0.0133767	-0.224354	Yes	Yes	Yes	Yes
ENSG00000204466	known_processed_transcript	Diacylglycerol kinase, kappa	DGKK	-0.955655	0.899509	-3.44584	0.000690233	0.0153688	-0.57581	Yes	Yes	Yes	Yes
ENSG00000205056	lincRNA	long intergenic non-protein coding RNA 2397 Source	LINC02397	-0.918667	1.22487	-4.35454	2.1e-05	0.00363865	2.54501	Yes	Yes	Yes	Yes
ENSG00000234184	lincRNA	long intergenic non-protein coding RNA 1781 Source	LINC01781	-0.978358	0.547621	-4.68259	5.14e-06	0.00243154	3.81946	Yes	Yes	Yes	Yes
ENSG00000235621	lincRNA	long intergenic non-protein coding RNA 494 Source	LINC00494	-1.03412	1.0276	-5.87536	1.68e-08	0.000221394	9.04346	Yes	Yes	Yes	Yes
ENSG00000247982	lincRNA	long intergenic non-protein coding RNA 926 Source	LINC00926	-0.65162	4.75119	-3.67227	0.000306572	0.0112289	0.143201	Yes	Yes	Yes	Yes
ENSG00000260655	lincRNA	CTA-250D10.23	CTA-250D10.23	-0.65087	3.07224	-3.97163	9.87e-05	0.00684094	1.15443	Yes	Yes	Yes	Yes
ENSG00000256720	processed_pseudogene	BTG anti-proliferation factor 1 pseudogene 1 Source	BTG1P1	-0.639794	-0.281297	-3.5594	0.000461718	0.0133658	-0.220221	Yes	Yes	Yes	Yes
ENSG00000130600	processed_transcript	H19, imprinted maternally expressed transcript Source	H19	1.32231	-0.697345	4.84851	2.45e-06	0.00180945	4.49213	Yes	Yes	Yes	Yes
ENSG00000002745	protein_coding	Wnt family member 16 Source	WNT16	-0.880241	-0.294553	-3.42165	0.000750962	0.0158953	-0.650217	Yes	Yes	Yes	Yes
ENSG00000030419	protein_coding	IKAROS family zinc finger 2 Source	IKZF2	-0.649358	4.11383	-4.91564	1.81e-06	0.00171489	4.76946	Yes	Yes	Yes	Yes
ENSG00000037280	protein_coding	fms related tyrosine kinase 4 Source	FLT4	-0.599718	1.79111	-3.69843	0.00027843	0.0107317	0.228823	Yes	Yes	Yes	Yes
ENSG00000062524	protein_coding	leukocyte receptor tyrosine kinase Source	LTK	-0.59046	2.55285	-3.82337	0.000174515	0.00909201	0.645101	Yes	Yes	Yes	Yes
ENSG00000074527	protein_coding	netrin 4 Source	NTN4	-0.791165	0.026026	-3.40981	0.000782479	0.0161197	-0.68647	Yes	Yes	Yes	Yes
ENSG00000081052	protein_coding	collagen type IV alpha 4 chain Source	COL4A4	-1.04017	0.57788	-5.76865	2.91e-08	0.000221394	8.54113	Yes	Yes	Yes	Yes
ENSG00000082438	protein_coding	cordon-bleu WH2 repeat protein like 1 Source	COBLL1	-0.684711	3.24288	-4.74315	3.93e-06	0.00220784	4.06284	Yes	Yes	Yes	Yes
ENSG00000088827	protein_coding	sialic acid binding Ig like lectin 1 Source	SIGLEC1	0.850115	3.73704	3.64306	0.000341162	0.0115081	0.0482093	Yes	Yes	Yes	Yes
ENSG00000091129	protein_coding	neuronal cell adhesion molecule Source	NRCAM	-0.903932	0.323435	-3.40934	0.00078378	0.0161247	-0.687935	Yes	Yes	Yes	Yes
ENSG00000100473	protein_coding	cochlin Source	COCH	-0.691009	1.56318	-3.66668	0.00031293	0.0112289	0.124956	Yes	Yes	Yes	Yes
ENSG00000100985	protein_coding	matrix metallopeptidase 9 Source	MMP9	0.751545	6.69209	3.65435	0.000327387	0.0115081	0.0848231	Yes	Yes	Yes	Yes
ENSG00000101425	protein_coding	bactericidal permeability increasing protein Source	BPI	0.721831	3.69897	3.3934	0.000828234	0.0168796	-0.736559	Yes	Yes	Yes	Yes
ENSG00000103647	protein_coding	coronin 2B Source	CORO2B	-0.740291	0.708709	-3.01156	0.00292528	0.0323181	-1.84032	Yes	Yes	Yes	Yes
ENSG00000106686	protein_coding	spermatogenesis associated 6 like Source	SPATA6L	-0.630031	-0.52703	-3.29566	0.00115663	0.020124	-1.03032	Yes	Yes	Yes	Yes
ENSG00000108797	protein_coding	contactin associated protein 1 Source	CNTNAP1	-0.654893	2.07513	-5.17245	5.47e-07	0.00138882	5.85754	Yes	Yes	Yes	Yes
ENSG00000110318	protein_coding	centrosomal protein 126 Source	CEP126	-0.620565	1.68223	-4.82487	2.73e-06	0.00188767	4.39515	Yes	Yes	Yes	Yes
ENSG00000114948	protein_coding	ADAM metallopeptidase domain 23 Source	ADAM23	-0.660133	1.35124	-3.4433	0.000696367	0.0153973	-0.58362	Yes	Yes	Yes	Yes
ENSG00000117281	protein_coding	CD160 molecule Source	CD160	-0.6968	3.81627	-4.52591	1.02e-05	0.00309741	3.20147	Yes	Yes	Yes	Yes
ENSG00000119917	protein_coding	interferon induced protein with tetratricopeptide repeats 3 Source	IFIT3	0.599253	7.2181	3.13488	0.00197094	0.0265771	-1.49681	Yes	Yes	Yes	Yes
ENSG00000123095	protein_coding	basic helix-loop-helix family member e41 Source	BHLHE41	-0.75476	1.14133	-4.48846	1.19e-05	0.00310253	3.05624	Yes	Yes	Yes	Yes
ENSG00000123096	protein_coding	sarcospan Source	SSPN	-0.72246	0.281907	-4.14148	5.04e-05	0.00508912	1.75808	Yes	Yes	Yes	Yes
ENSG00000123219	protein_coding	centromere protein K Source	CENPK	-0.600139	2.37715	-3.17945	0.00170375	0.0246888	-1.36962	Yes	Yes	Yes	Yes
ENSG00000126709	protein_coding	interferon alpha inducible protein 6 Source	IFI6	0.692073	5.39653	3.46172	0.000652889	0.0151026	-0.526697	Yes	Yes	Yes	Yes
ENSG00000127990	protein_coding	sarcoglycan epsilon Source	SGCE	-0.690547	-0.524848	-3.49698	0.00057662	0.0143219	-0.416918	Yes	Yes	Yes	Yes
ENSG00000132185	protein_coding	Fc receptor like A Source	FCRLA	-0.662324	4.68524	-4.26386	3.06e-05	0.00404618	2.20609	Yes	Yes	Yes	Yes
ENSG00000132704	protein_coding	Fc receptor like 2 Source	FCRL2	-0.719927	3.7266	-4.24796	3.27e-05	0.00415457	2.14729	Yes	Yes	Yes	Yes
ENSG00000134121	protein_coding	cell adhesion molecule L1 like Source	CHL1	-0.882753	-1.06772	-3.27664	0.00123325	0.0208612	-1.08662	Yes	Yes	Yes	Yes
ENSG00000134321	protein_coding	radical S-adenosyl methionine domain containing 2 Source	RSAD2	0.949501	5.13246	3.30509	0.00112034	0.0199486	-1.00232	Yes	Yes	Yes	Yes
ENSG00000134326	protein_coding	cytidine/uridine monophosphate kinase 2 Source	CMPK2	0.674546	4.23192	3.20662	0.00155773	0.0235033	-1.29126	Yes	Yes	Yes	Yes
ENSG00000135318	protein_coding	5'-nucleotidase ecto Source	NT5E	-0.586241	3.42678	-3.86416	0.000149445	0.00817451	0.783584	Yes	Yes	Yes	Yes
ENSG00000136573	protein_coding	BLK proto-oncogene, Src family tyrosine kinase Source	BLK	-0.615702	4.52841	-4.54033	9.56e-06	0.00303232	3.25764	Yes	Yes	Yes	Yes
ENSG00000137959	protein_coding	interferon induced protein 44 like Source	IFI44L	0.858267	4.76978	3.41938	0.000756927	0.0159026	-0.657195	Yes	Yes	Yes	Yes
ENSG00000137965	protein_coding	interferon induced protein 44 Source	IFI44	0.679622	5.2674	3.69971	0.000277112	0.0107317	0.233045	Yes	Yes	Yes	Yes
ENSG00000139572	protein_coding	G protein-coupled receptor 84 Source	GPR84	0.585199	1.05359	4.20676	3.87e-05	0.00461407	1.99569	Yes	Yes	Yes	Yes
ENSG00000144290	protein_coding	solute carrier family 4 member 10 Source	SLC4A10	-1.09846	2.33468	-4.24554	3.3e-05	0.00415457	2.13833	Yes	Yes	Yes	Yes
ENSG00000144645	protein_coding	oxysterol binding protein like 10 Source	OSBPL10	-0.752407	3.2414	-4.99645	1.25e-06	0.00159478	5.10728	Yes	Yes	Yes	Yes
ENSG00000144824	protein_coding	pleckstrin homology like domain family B member 2 Source	PHLDB2	-0.602304	2.72112	-4.4019	1.72e-05	0.00350937	2.72438	Yes	Yes	Yes	Yes
ENSG00000147180	protein_coding	zinc finger protein 711 Source	ZNF711	-0.736532	0.44823	-4.09546	6.06e-05	0.00555648	1.5924	Yes	Yes	Yes	Yes
ENSG00000148600	protein_coding	cadherin related family member 1 Source	CDHR1	-0.655746	1.53101	-4.95853	1.48e-06	0.00171489	4.94822	Yes	Yes	Yes	Yes
ENSG00000148848	protein_coding	ADAM metallopeptidase domain 12 Source	ADAM12	-0.686954	0.723444	-3.70404	0.00027272	0.0107317	0.24726	Yes	Yes	Yes	Yes
ENSG00000149131	protein_coding	serpin family G member 1 Source	SERPING1	0.619798	4.54452	3.0968	0.00222943	0.0282199	-1.60422	Yes	Yes	Yes	Yes
ENSG00000149557	protein_coding	fasciculation and elongation protein zeta 1 Source	FEZ1	-0.63336	1.82227	-4.12238	5.44e-05	0.00527533	1.68912	Yes	Yes	Yes	Yes
ENSG00000150625	protein_coding	glycoprotein M6A Source	GPM6A	-0.833654	-0.482708	-2.86872	0.00455183	0.0406822	-2.22248	Yes	Yes	Yes	Yes
ENSG00000152766	protein_coding	ankyrin repeat domain 22 Source	ANKRD22	0.645007	1.78788	3.64049	0.000344386	0.0115081	0.0398566	Yes	Yes	Yes	Yes
ENSG00000152894	protein_coding	protein tyrosine phosphatase, receptor type K Source	PTPRK	-0.61565	2.0842	-4.06881	6.74e-05	0.00586255	1.4972	Yes	Yes	Yes	Yes
ENSG00000153064	protein_coding	B cell scaffold protein with ankyrin repeats 1 Source	BANK1	-0.592285	5.60259	-4.26065	3.1e-05	0.00404618	2.19421	Yes	Yes	Yes	Yes
ENSG00000154734	protein_coding	ADAM metallopeptidase with thrombospondin type 1 motif 1 Source	ADAMTS1	-0.743209	2.05907	-4.28552	2.8e-05	0.00394872	2.28653	Yes	Yes	Yes	Yes
ENSG00000155974	protein_coding	glutamate receptor interacting protein 1 Source	GRIP1	-0.847545	-0.165767	-3.9655	0.000101115	0.00687221	1.13305	Yes	Yes	Yes	Yes
ENSG00000156453	protein_coding	protocadherin 1 Source	PCDH1	-0.804229	1.06376	-4.31116	2.52e-05	0.00379244	2.38216	Yes	Yes	Yes	Yes
ENSG00000156738	protein_coding	membrane spanning 4-domains A1 Source	MS4A1	-0.612324	6.77093	-3.973	9.82e-05	0.00684094	1.1592	Yes	Yes	Yes	Yes
ENSG00000157601	protein_coding	MX dynamin like GTPase 1 Source	MX1	0.618036	7.04742	3.23991	0.00139466	0.022071	-1.19445	Yes	Yes	Yes	Yes
ENSG00000159958	protein_coding	TNF receptor superfamily member 13C Source	TNFRSF13C	-0.71455	1.63707	-4.54411	9.41e-06	0.00303232	3.27237	Yes	Yes	Yes	Yes
ENSG00000162630	protein_coding	beta-1,3-galactosyltransferase 2 Source	B3GALT2	-0.681856	1.14673	-3.77091	0.000212638	0.00985934	0.468873	Yes	Yes	Yes	Yes
ENSG00000163534	protein_coding	Fc receptor like 1 Source	FCRL1	-0.688252	4.7068	-3.75398	0.00022654	0.00992578	0.412437	Yes	Yes	Yes	Yes
ENSG00000163701	protein_coding	interleukin 17 receptor E Source	IL17RE	-0.793258	-0.369098	-4.05851	7.02e-05	0.0059352	1.46052	Yes	Yes	Yes	Yes
ENSG00000164047	protein_coding	cathelicidin antimicrobial peptide Source	CAMP	0.674196	3.44722	3.11941	0.00207245	0.0273661	-1.54061	Yes	Yes	Yes	Yes
ENSG00000164330	protein_coding	EBF transcription factor 1 Source	EBF1	-0.665931	1.93977	-3.94724	0.000108551	0.00718515	1.06951	Yes	Yes	Yes	Yes
ENSG00000165338	protein_coding	HECT domain E3 ubiquitin protein ligase 2 Source	HECTD2	-0.655411	-0.334715	-3.75159	0.000228575	0.00992578	0.404471	Yes	Yes	Yes	Yes
ENSG00000165810	protein_coding	butyrophilin like 9 Source	BTNL9	-0.855973	-1.09464	-3.11729	0.00208672	0.0274628	-1.54659	Yes	Yes	Yes	Yes
ENSG00000165949	protein_coding	interferon alpha inducible protein 27 Source	IFI27	0.955226	0.927565	2.86807	0.00456076	0.0406822	-2.22417	Yes	Yes	Yes	Yes
ENSG00000167633	protein_coding	killer cell immunoglobulin like receptor, three Ig domains and long cytoplasmic tail 1 Source	KIR3DL1	-0.621518	2.62259	-3.00941	0.00294518	0.0324518	-1.8462	Yes	Yes	Yes	Yes
ENSG00000167723	protein_coding	transient receptor potential cation channel subfamily V member 3 Source	TRPV3	-0.670374	-0.427681	-3.49107	0.000588804	0.0144347	-0.435406	Yes	Yes	Yes	Yes
ENSG00000168062	protein_coding	basic leucine zipper ATF-like transcription factor 2 Source	BATF2	0.616319	2.78843	3.05516	0.00254768	0.0301366	-1.72032	Yes	Yes	Yes	Yes
ENSG00000169031	protein_coding	collagen type IV alpha 3 chain Source	COL4A3	-1.17134	0.527	-5.561	8.29e-08	0.000420542	7.58234	Yes	Yes	Yes	Yes
ENSG00000169744	protein_coding	LIM domain binding 2 Source	LDB2	-0.705534	-0.685064	-3.22087	0.0014859	0.0228037	-1.24995	Yes	Yes	Yes	Yes
ENSG00000170866	protein_coding	Leukocyte immunoglobulin-like receptor, subfamily A (without TM domain), member 3	LILRA3	0.597102	5.68635	2.91181	0.00399037	0.0381213	-2.10899	Yes	Yes	Yes	Yes
ENSG00000174469	protein_coding	contactin associated protein like 2 Source	CNTNAP2	-1.13806	1.71495	-3.38783	0.000844309	0.0169575	-0.753495	Yes	Yes	Yes	Yes
ENSG00000174607	protein_coding	UDP glycosyltransferase 8 Source	UGT8	-0.720368	0.212778	-3.28439	0.00120146	0.0206212	-1.0637	Yes	Yes	Yes	Yes
ENSG00000179044	protein_coding	exocyst complex component 3 like 1 Source	EXOC3L1	0.84392	-1.10258	3.52175	0.000528136	0.0139368	-0.339226	Yes	Yes	Yes	Yes
ENSG00000183960	protein_coding	potassium voltage-gated channel subfamily H member 8 Source	KCNH8	-0.961149	0.49158	-4.54806	9.25e-06	0.00303232	3.28781	Yes	Yes	Yes	Yes
ENSG00000184226	protein_coding	protocadherin 9 Source	PCDH9	-0.619934	1.37025	-3.04418	0.0026383	0.0307782	-1.75069	Yes	Yes	Yes	Yes
ENSG00000185745	protein_coding	interferon induced protein with tetratricopeptide repeats 1 Source	IFIT1	0.804818	6.17115	3.28995	0.00117916	0.0203531	-1.04725	Yes	Yes	Yes	Yes
ENSG00000186231	protein_coding	kelch like family member 32 Source	KLHL32	-0.672456	0.0311704	-4.40577	1.7e-05	0.00350937	2.7391	Yes	Yes	Yes	Yes
ENSG00000187608	protein_coding	ISG15 ubiquitin-like modifier Source	ISG15	0.815001	4.37684	3.51092	0.000548851	0.0141522	-0.373267	Yes	Yes	Yes	Yes
ENSG00000188848	protein_coding	BEN domain containing 4 Source	BEND4	-0.64132	1.23709	-3.86353	0.000149809	0.00817451	0.781414	Yes	Yes	Yes	Yes
ENSG00000196159	protein_coding	FAT atypical cadherin 4 Source	FAT4	-0.776889	-0.0896197	-3.30512	0.00112021	0.0199486	-1.00222	Yes	Yes	Yes	Yes
ENSG00000197385	protein_coding	zinc finger protein 860 Source	ZNF860	-0.983992	1.14874	-4.57166	8.35e-06	0.00288933	3.38015	Yes	Yes	Yes	Yes
ENSG00000214279	protein_coding	scavenger receptor family member expressed on T cells 1 Source	SCART1	-0.756156	1.55725	-4.49683	1.15e-05	0.00310253	3.08862	Yes	Yes	Yes	Yes
ENSG00000227051	protein_coding	chromosome 14 open reading frame 132 Source	C14orf132	-0.631654	1.55816	-3.3044	0.00112294	0.0199548	-1.00436	Yes	Yes	Yes	Yes
ENSG00000240505	protein_coding	TNF receptor superfamily member 13B Source	TNFRSF13B	-0.792591	0.803071	-4.18463	4.23e-05	0.00468696	1.91478	Yes	Yes	Yes	Yes
ENSG00000242265	protein_coding	paternally expressed 10 Source	PEG10	-0.694572	1.37778	-4.03503	7.7e-05	0.00624795	1.37726	Yes	Yes	Yes	Yes
ENSG00000257017	protein_coding	haptoglobin Source	HP	1.0118	3.1279	4.46549	1.32e-05	0.00318336	2.96765	Yes	Yes	Yes	Yes
ENSG00000257950	protein_coding	P2RX5-TAX1BP3 readthrough (NMD candidate) Source	P2RX5-TAX1BP3	-0.68639	0.35824	-3.69094	0.000286224	0.0108981	0.204269	Yes	Yes	Yes	Yes
ENSG00000251606	putative_protein_coding	Uncharacterized protein	CTD-2215E18.1	-0.900129	-0.929224	-3.4429	0.000697343	0.0153973	-0.584856	Yes	Yes	Yes	Yes
ENSG00000211803	TR_V_gene	T cell receptor alpha variable 23/delta variable 6 Source	TRAV23DV6	-0.789323	1.63923	-4.10216	5.9e-05	0.00547571	1.61644	Yes	Yes	Yes	Yes
ENSG00000211821	TR_V_gene	T cell receptor delta variable 2 Source	TRDV2	-1.04399	1.4474	-3.10776	0.00215201	0.0277999	-1.57344	Yes	Yes	Yes	Yes
ENSG00000128438	transcribed_unprocessed_pseudogene	TBC1 domain family member 27, pseudogene Source	TBC1D27P	-0.870717	0.659756	-4.32283	2.4e-05	0.00379244	2.42584	Yes	Yes	Yes	Yes
ENSG00000171101	transcribed_unprocessed_pseudogene	sialic acid binding Ig like lectin 17, pseudogene Source	SIGLEC17P	-0.65248	3.11436	-4.88174	2.11e-06	0.00171489	4.62904	Yes	Yes	Yes	Yes
ENSG00000186481	transcribed_unprocessed_pseudogene	ankyrin repeat domain 20 family member A5, pseudogene Source	ANKRD20A5P	-0.642566	0.0397312	-3.24076	0.00139074	0.0220319	-1.19199	Yes	Yes	Yes	Yes
ENSG00000257221	antisense	novel transcript, antisense to SELPLG	AC007569.1	-0.665687	-1.1496	-3.21234	0.00152849	0.0231309	-1.27468	Yes	Yes	Yes	No
ENSG00000257275	antisense	novel transcript, antisense to TCL1A	AL139020.1	-0.850094	1.21307	-3.07482	0.00239256	0.0292436	-1.66569	Yes	Yes	Yes	No
ENSG00000211967	IG_V_gene	immunoglobulin heavy variable 3-53 Source	IGHV3-53	-0.723627	0.884577	-3.49255	0.000585721	0.0144055	-0.430766	Yes	Yes	Yes	No
ENSG00000240864	IG_V_gene	immunoglobulin kappa variable 1-16 Source	IGKV1-16	-0.897104	1.20961	-3.46537	0.000644558	0.0151026	-0.515354	Yes	Yes	Yes	No
ENSG00000244575	IG_V_gene	immunoglobulin kappa variable 1-27 Source	IGKV1-27	-0.64867	1.2751	-2.89961	0.00414256	0.038691	-2.14129	Yes	Yes	Yes	No
ENSG00000189011	known_pseudogene	AC138783.12	AC138783.12	-1.2781	0.161664	-3.08865	0.00228865	0.028536	-1.62705	Yes	Yes	Yes	No
ENSG00000232855	lincRNA	novel transcript	AF165147.1	-0.587943	-1.00294	-2.95068	0.00353905	0.0357209	-2.00529	Yes	Yes	Yes	No
ENSG00000230850	lincRNA	RP11-782C8.1	RP11-782C8.1	-0.955995	-0.614807	-3.64024	0.000344699	0.0115081	0.0390494	Yes	Yes	Yes	No
ENSG00000240754	lincRNA	RP11-38J22.6	RP11-38J22.6	-0.782141	-0.405023	-3.6011	0.000397349	0.0125243	-0.0871181	Yes	Yes	Yes	No
ENSG00000253701	lincRNA	AL928768.3	AL928768.3	-0.937657	2.32458	-4.72807	4.21e-06	0.00220784	4.002	Yes	Yes	Yes	No
ENSG00000218208	processed_pseudogene	ribosomal protein S27a pseudogene 11 Source	RPS27AP11	-0.661642	-0.983892	-2.8525	0.00478111	0.0419042	-2.26478	Yes	Yes	Yes	No
ENSG00000226564	processed_pseudogene	ferritin heavy chain 1 pseudogene 20 Source	FTH1P20	0.941368	-1.25786	2.84394	0.00490639	0.0426341	-2.28703	Yes	Yes	Yes	No
ENSG00000232460	processed_pseudogene	bone morphogenetic protein receptor type 1A pseudogene 2 Source	BMPR1APS2	-0.74285	-1.03616	-2.91751	0.00392097	0.0378282	-2.09385	Yes	Yes	Yes	No
ENSG00000240445	processed_pseudogene	forkhead box O3B (pseudogene) Source	FOXO3B	-0.740404	-0.248073	-2.86335	0.00462664	0.0409992	-2.23652	Yes	Yes	Yes	No
ENSG00000224376	processed_transcript	novel transcript	AC017104.1	-0.800759	-0.748752	-4.50511	1.11e-05	0.00310253	3.12067	Yes	Yes	Yes	No
ENSG00000271816	processed_transcript	novel transcript	BMS1P4	-0.796829	0.0222778	-3.57129	0.000442426	0.0130887	-0.182401	Yes	Yes	Yes	No
ENSG00000075275	protein_coding	cadherin EGF LAG seven-pass G-type receptor 1 Source	CELSR1	-0.586252	2.18179	-4.18371	4.25e-05	0.00468696	1.91144	Yes	Yes	Yes	No
ENSG00000082293	protein_coding	collagen type XIX alpha 1 chain Source	COL19A1	-0.707663	0.812107	-3.03976	0.0026756	0.0311179	-1.76289	Yes	Yes	Yes	No
ENSG00000100448	protein_coding	cathepsin G Source	CTSG	0.967791	0.593621	3.17392	0.00173495	0.0248882	-1.38548	Yes	Yes	Yes	No
ENSG00000105492	protein_coding	sialic acid binding Ig like lectin 6 Source	SIGLEC6	-0.653978	0.669459	-3.52171	0.000528213	0.0139368	-0.339355	Yes	Yes	Yes	No
ENSG00000109686	protein_coding	SH3 domain containing 19 Source	SH3D19	-0.768973	-0.923405	-3.13982	0.00193952	0.0263401	-1.4828	Yes	Yes	Yes	No
ENSG00000110237	protein_coding	Rho guanine nucleotide exchange factor 17 Source	ARHGEF17	0.594743	-0.0127483	2.89034	0.0042616	0.0393442	-2.16572	Yes	Yes	Yes	No
ENSG00000113356	protein_coding	RNA polymerase III subunit G Source	POLR3G	-0.625439	-0.715739	-3.52327	0.000525285	0.0139325	-0.334437	Yes	Yes	Yes	No
ENSG00000114993	protein_coding	rhotekin Source	RTKN	-0.67183	-0.171478	-4.06067	6.96e-05	0.00591744	1.46821	Yes	Yes	Yes	No
ENSG00000115183	protein_coding	tetratricopeptide repeat, ankyrin repeat and coiled-coil containing 1 Source	TANC1	-0.672922	-1.17248	-2.95829	0.00345631	0.0352631	-1.98483	Yes	Yes	Yes	No
ENSG00000122642	protein_coding	FKBP prolyl isomerase 9 Source	FKBP9	0.616845	2.02635	5.28287	3.23e-07	0.0012301	6.3383	Yes	Yes	Yes	No
ENSG00000128218	protein_coding	V-set pre-B cell surrogate light chain 3 Source	VPREB3	-0.597853	2.2909	-3.18982	0.00164657	0.0242197	-1.33978	Yes	Yes	Yes	No
ENSG00000128886	protein_coding	elongation factor for RNA polymerase II 3 Source	ELL3	-0.64439	0.200663	-3.65137	0.00033097	0.0115081	0.0751512	Yes	Yes	Yes	No
ENSG00000130202	protein_coding	nectin cell adhesion molecule 2 Source	NECTIN2	0.906601	2.59527	3.45932	0.000658408	0.0151414	-0.534132	Yes	Yes	Yes	No
ENSG00000130222	protein_coding	growth arrest and DNA damage inducible gamma Source	GADD45G	0.609088	-0.967709	3.05892	0.00251733	0.0298938	-1.7099	Yes	Yes	Yes	No
ENSG00000130702	protein_coding	laminin subunit alpha 5 Source	LAMA5	-0.611368	1.01789	-3.20278	0.00157762	0.0235931	-1.30237	Yes	Yes	Yes	No
ENSG00000135116	protein_coding	harakiri, BCL2 interacting protein Source	HRK	-0.661611	-0.128505	-2.7963	0.00565987	0.0455422	-2.40972	Yes	Yes	Yes	No
ENSG00000136895	protein_coding	GTPase activating Rap/RanGAP domain like 3 Source	GARNL3	-0.611949	-0.833318	-3.35371	0.00094939	0.0180895	-0.856771	Yes	Yes	Yes	No
ENSG00000139044	protein_coding	beta-1,4-N-acetyl-galactosaminyltransferase 3 Source	B4GALNT3	-0.829909	1.52795	-2.75803	0.0063396	0.0477556	-2.50688	Yes	Yes	Yes	No
ENSG00000141622	protein_coding	ring finger protein 165 Source	RNF165	-0.604241	1.5305	-3.91787	0.000121614	0.00752622	0.967823	Yes	Yes	Yes	No
ENSG00000143184	protein_coding	X-C motif chemokine ligand 1 Source	XCL1	-0.738125	1.11546	-3.6965	0.000280413	0.0107803	0.222513	Yes	Yes	Yes	No
ENSG00000143297	protein_coding	Fc receptor like 5 Source	FCRL5	-0.597463	3.88497	-3.44852	0.000683791	0.0153314	-0.567532	Yes	Yes	Yes	No
ENSG00000148346	protein_coding	lipocalin 2 Source	LCN2	0.673308	3.98549	2.73653	0.00675309	0.0494274	-2.56092	Yes	Yes	Yes	No
ENSG00000153253	protein_coding	sodium voltage-gated channel alpha subunit 3 Source	SCN3A	-1.08006	0.737008	-4.15799	4.71e-05	0.00489918	1.81785	Yes	Yes	Yes	No
ENSG00000158528	protein_coding	protein phosphatase 1 regulatory subunit 9A Source	PPP1R9A	-0.625377	-0.113327	-3.16488	0.00178717	0.0253096	-1.41138	Yes	Yes	Yes	No
ENSG00000160318	protein_coding	claudin domain containing 2 Source	CLDND2	-0.58672	0.747805	-3.73746	0.000240924	0.0101485	0.357602	Yes	Yes	Yes	No
ENSG00000164082	protein_coding	glutamate metabotropic receptor 2 Source	GRM2	-0.590821	-0.534476	-2.95286	0.00351516	0.0356349	-1.99944	Yes	Yes	Yes	No
ENSG00000164821	protein_coding	defensin alpha 4 Source	DEFA4	0.931569	1.746	2.95811	0.00345821	0.0352631	-1.98531	Yes	Yes	Yes	No
ENSG00000169435	protein_coding	Ras association domain family member 6 Source	RASSF6	-0.630126	-0.270155	-2.97999	0.00323016	0.0338567	-1.92625	Yes	Yes	Yes	No
ENSG00000170456	protein_coding	DENN domain containing 5B Source	DENND5B	-0.630522	2.49034	-4.44605	1.43e-05	0.00340348	2.89297	Yes	Yes	Yes	No
ENSG00000172548	protein_coding	NIPA like domain containing 4 Source	NIPAL4	-0.747423	-0.691472	-3.30841	0.00110779	0.0198636	-0.992431	Yes	Yes	Yes	No
ENSG00000187912	protein_coding	C-type lectin domain containing 17A Source	CLEC17A	-0.694798	2.63825	-4.10896	5.74e-05	0.00536165	1.64084	Yes	Yes	Yes	No
ENSG00000188385	protein_coding	Janus kinase and microtubule interacting protein 3 Source	JAKMIP3	-0.622885	-0.700212	-2.93853	0.00367477	0.0363987	-2.03783	Yes	Yes	Yes	No
ENSG00000196092	protein_coding	paired box 5 Source	PAX5	-0.623126	5.15888	-3.61115	0.000383147	0.0123476	-0.0548268	Yes	Yes	Yes	No
ENSG00000196735	protein_coding	major histocompatibility complex, class II, DQ alpha 1 Source	HLA-DQA1	-0.711432	6.04778	-3.01549	0.00288927	0.032156	-1.82958	Yes	Yes	Yes	No
ENSG00000197705	protein_coding	kelch like family member 14 Source	KLHL14	-0.605895	2.15988	-3.64144	0.000343192	0.0115081	0.0429421	Yes	Yes	Yes	No
ENSG00000204172	protein_coding	ArfGAP with GTPase domain, ankyrin repeat and PH domain 9 Source	AGAP9	-0.635186	1.77304	-2.91318	0.00397356	0.0380941	-2.10535	Yes	Yes	Yes	No
ENSG00000205238	protein_coding	speedy/RINGO cell cycle regulator family member E2 Source	SPDYE2	-0.736843	-1.16768	-2.887	0.0043054	0.0396044	-2.17453	Yes	Yes	Yes	No
ENSG00000206077	protein_coding	zinc finger DHHC-type containing 11B Source	ZDHHC11B	-0.742415	0.810339	-3.1491	0.00188177	0.0258556	-1.45642	Yes	Yes	Yes	No
ENSG00000213214	protein_coding	Rho guanine nucleotide exchange factor 35 Source	ARHGEF35	-0.614556	0.63914	-2.81537	0.0053464	0.0444774	-2.36083	Yes	Yes	Yes	No
ENSG00000214595	protein_coding	EMAP like 6 Source	EML6	-0.808807	1.05334	-4.99469	1.26e-06	0.00159478	5.09985	Yes	Yes	Yes	No
ENSG00000228486	protein_coding	chromosome 2 open reading frame 92 Source	C2orf92	-0.701522	0.0298335	-4.8785	2.14e-06	0.00171489	4.61567	Yes	Yes	Yes	No
ENSG00000239704	protein_coding	CMT1A duplicated region transcript 4 Source	CDRT4	-0.779545	2.16185	-3.24318	0.00137955	0.021984	-1.18491	Yes	Yes	Yes	No
ENSG00000242866	protein_coding	stereocilin Source	STRC	-0.793739	-0.923012	-3.89021	0.000135267	0.00786631	0.872673	Yes	Yes	Yes	No
ENSG00000256514	protein_coding	novel protein	AP003419.1	-0.808	2.65062	-2.78071	0.0059282	0.0462751	-2.44943	Yes	Yes	Yes	No
ENSG00000270181	protein_coding	BIVM-ERCC5 readthrough Source	BIVM-ERCC5	-0.772223	3.95633	-2.79369	0.005704	0.0456184	-2.41638	Yes	Yes	Yes	No
ENSG00000211695	TR_V_gene	T cell receptor gamma variable 9 Source	TRGV9	-0.742576	2.02275	-3.75852	0.000222727	0.0099146	0.427561	Yes	Yes	Yes	No
ENSG00000211698	TR_V_gene	T cell receptor gamma variable 4 Source	TRGV4	-1.02274	0.692943	-2.94469	0.00360538	0.0360276	-2.02135	Yes	Yes	Yes	No
ENSG00000211699	TR_V_gene	T cell receptor gamma variable 3 Source	TRGV3	-0.707659	1.10531	-3.41431	0.000770374	0.0160372	-0.672723	Yes	Yes	Yes	No
ENSG00000211720	TR_V_gene	T cell receptor beta variable 11-1 Source	TRBV11-1	-0.629144	-0.753307	-2.86334	0.00462668	0.0409992	-2.23653	Yes	Yes	Yes	No
ENSG00000211816	TR_V_gene	T cell receptor alpha variable 38-1 Source	TRAV38-1	-0.802814	0.225205	-4.25885	3.13e-05	0.00404618	2.18755	Yes	Yes	Yes	No
ENSG00000214776	transcribed_unprocessed_pseudogene	ovostatin	AC092821.1	-0.793813	-0.685366	-3.11166	0.00212509	0.0276676	-1.56247	Yes	Yes	Yes	No
ENSG00000226942	unprocessed_pseudogene	interleukin 9 receptor pseudogene 3 Source	IL9RP3	-0.888149	-0.960603	-3.00964	0.00294304	0.0324518	-1.84557	Yes	Yes	Yes	No

## Sheet: Validation
Gene	Biotype	Gene Name	Gene Symbol	logFC	AveExpr	t	P.Value	adj.P.Val	B	|FC| > 1.5	q <0.05	Significant	Replicated
ENSG00000091129	protein_coding	neuronal cell adhesion molecule	NRCAM	-1.90467	0.0667772	-5.83367	3.71e-08	1.82e-05	8.4431	Yes	Yes	Yes	Yes
ENSG00000110318	protein_coding	centrosomal protein 126	CEP126	-0.748803	1.68298	-5.69899	7.06e-08	2.56e-05	7.84063	Yes	Yes	Yes	Yes
ENSG00000030419	protein_coding	IKAROS family zinc finger 2	IKZF2	-0.81125	4.14669	-5.50798	1.73e-07	3.82e-05	7.00086	Yes	Yes	Yes	Yes
ENSG00000149131	protein_coding	serpin family G member 1	SERPING1	1.45646	4.75631	5.33674	3.81e-07	5.49e-05	6.26325	Yes	Yes	Yes	Yes
ENSG00000152766	protein_coding	ankyrin repeat domain 22	ANKRD22	1.15562	1.96749	5.30795	4.34e-07	5.75e-05	6.1407	Yes	Yes	Yes	Yes
ENSG00000227051	protein_coding	chromosome 14 open reading frame 132	C14orf132	-1.21318	1.49141	-5.29059	4.7e-07	5.96e-05	6.067	Yes	Yes	Yes	Yes
ENSG00000135318	protein_coding	5'-nucleotidase ecto	NT5E	-1.08644	3.30626	-5.22699	6.27e-07	7.07e-05	5.79834	Yes	Yes	Yes	Yes
ENSG00000139572	protein_coding	G protein-coupled receptor 84	GPR84	0.832234	1.16394	5.21089	6.74e-07	7.21e-05	5.7307	Yes	Yes	Yes	Yes
ENSG00000168062	protein_coding	basic leucine zipper ATF-like transcription factor 2	BATF2	1.28796	3.13086	5.11005	1.06e-06	8.92e-05	5.30998	Yes	Yes	Yes	Yes
ENSG00000234184	lincRNA	long intergenic non-protein coding RNA 1781	LINC01781	-1.18982	0.255539	-5.05937	1.32e-06	9.96e-05	5.10063	Yes	Yes	Yes	Yes
ENSG00000149557	protein_coding	fasciculation and elongation protein zeta 1	FEZ1	-0.878483	1.64619	-4.91361	2.51e-06	0.000146681	4.50637	Yes	Yes	Yes	Yes
ENSG00000257017	protein_coding	haptoglobin	HP	1.22571	3.38094	4.81213	3.88e-06	0.000187604	4.09974	Yes	Yes	Yes	Yes
ENSG00000148600	protein_coding	cadherin related family member 1	CDHR1	-0.947515	1.10748	-4.69747	6.32e-06	0.00024262	3.64743	Yes	Yes	Yes	Yes
ENSG00000169031	protein_coding	collagen type IV alpha 3 chain	COL4A3	-1.21579	0.551037	-4.67677	6.89e-06	0.000252851	3.56662	Yes	Yes	Yes	Yes
ENSG00000171101	transcribed_unprocessed_pseudogene	sialic acid binding Ig like lectin 17, pseudogene	SIGLEC17P	-0.817385	2.829	-4.63685	8.15e-06	0.000280858	3.41147	Yes	Yes	Yes	Yes
ENSG00000002745	protein_coding	Wnt family member 16	WNT16	-1.31183	-0.340377	-4.49682	1.45e-05	0.000409263	2.87482	Yes	Yes	Yes	Yes
ENSG00000037280	protein_coding	fms related tyrosine kinase 4	FLT4	-0.960191	1.55846	-4.49098	1.49e-05	0.000413011	2.85269	Yes	Yes	Yes	Yes
ENSG00000130600	processed_transcript	H19, imprinted maternally expressed transcript	H19	1.43558	-0.376898	4.35654	2.57e-05	0.000577471	2.34936	Yes	Yes	Yes	Yes
ENSG00000119917	protein_coding	interferon induced protein with tetratricopeptide repeats 3	IFIT3	1.16282	7.64572	4.32843	2.87e-05	0.000606043	2.24554	Yes	Yes	Yes	Yes
ENSG00000137965	protein_coding	interferon induced protein 44	IFI44	1.24826	5.69898	4.29377	3.3e-05	0.000660825	2.11826	Yes	Yes	Yes	Yes
ENSG00000126709	protein_coding	interferon alpha inducible protein 6	IFI6	1.23359	5.75883	4.26942	3.63e-05	0.000707305	2.02929	Yes	Yes	Yes	Yes
ENSG00000134326	protein_coding	cytidine/uridine monophosphate kinase 2	CMPK2	1.28618	4.68858	4.25267	3.88e-05	0.000739609	1.96832	Yes	Yes	Yes	Yes
ENSG00000144824	protein_coding	pleckstrin homology like domain family B member 2	PHLDB2	-0.669148	2.73363	-4.24801	3.95e-05	0.000749943	1.95137	Yes	Yes	Yes	Yes
ENSG00000157601	protein_coding	MX dynamin like GTPase 1	MX1	1.1708	7.4393	4.23421	4.17e-05	0.000768475	1.90131	Yes	Yes	Yes	Yes
ENSG00000186231	protein_coding	kelch like family member 32	KLHL32	-0.857983	-0.0418489	-4.23253	4.2e-05	0.000772637	1.89522	Yes	Yes	Yes	Yes
ENSG00000185745	protein_coding	interferon induced protein with tetratricopeptide repeats 1	IFIT1	1.43798	6.7057	4.17758	5.21e-05	0.000878652	1.69719	Yes	Yes	Yes	Yes
ENSG00000156453	protein_coding	protocadherin 1	PCDH1	-1.02248	1.12687	-4.1579	5.63e-05	0.000904321	1.62674	Yes	Yes	Yes	Yes
ENSG00000156738	protein_coding	membrane spanning 4-domains A1	MS4A1	-0.816573	6.75144	-4.15627	5.66e-05	0.000906262	1.62092	Yes	Yes	Yes	Yes
ENSG00000088827	protein_coding	sialic acid binding Ig like lectin 1	SIGLEC1	1.50206	4.26378	4.11371	6.67e-05	0.00100809	1.46951	Yes	Yes	Yes	Yes
ENSG00000134321	protein_coding	radical S-adenosyl methionine domain containing 2	RSAD2	1.70787	5.74228	4.11221	6.71e-05	0.00101115	1.46419	Yes	Yes	Yes	Yes
ENSG00000100473	protein_coding	cochlin	COCH	-0.859723	1.3577	-4.07567	7.73e-05	0.00110228	1.3352	Yes	Yes	Yes	Yes
ENSG00000164330	protein_coding	EBF transcription factor 1	EBF1	-0.832869	1.78998	-4.05925	8.23e-05	0.00115221	1.27749	Yes	Yes	Yes	Yes
ENSG00000082438	protein_coding	cordon-bleu WH2 repeat protein like 1	COBLL1	-0.744549	3.20326	-4.02572	9.35e-05	0.00125272	1.16029	Yes	Yes	Yes	Yes
ENSG00000106686	protein_coding	spermatogenesis associated 6 like	SPATA6L	-0.92932	-0.738379	-3.95974	0.000119935	0.00148383	0.931838	Yes	Yes	Yes	Yes
ENSG00000144290	protein_coding	solute carrier family 4 member 10	SLC4A10	-1.29431	1.95712	-3.94241	0.00012799	0.00154944	0.872314	Yes	Yes	Yes	Yes
ENSG00000137959	protein_coding	interferon induced protein 44 like	IFI44L	1.5052	5.40616	3.91612	0.000141199	0.00163821	0.782415	Yes	Yes	Yes	Yes
ENSG00000153064	protein_coding	B cell scaffold protein with ankyrin repeats 1	BANK1	-0.641088	5.59382	-3.88008	0.000161426	0.00179252	0.659976	Yes	Yes	Yes	Yes
ENSG00000260655	lincRNA	CTA-250D10.23	CTA-250D10.23	-0.85568	2.87133	-3.86683	0.000169535	0.00185683	0.615177	Yes	Yes	Yes	Yes
ENSG00000144645	protein_coding	oxysterol binding protein like 10	OSBPL10	-0.837298	3.13197	-3.85197	0.000179084	0.0019295	0.565106	Yes	Yes	Yes	Yes
ENSG00000187608	protein_coding	ISG15 ubiquitin-like modifier	ISG15	1.23436	4.78364	3.80465	0.000213033	0.00217665	0.406615	Yes	Yes	Yes	Yes
ENSG00000127990	protein_coding	sarcoglycan epsilon	SGCE	-1.04015	-0.568198	-3.78014	0.000232928	0.00231771	0.325169	Yes	Yes	Yes	Yes
ENSG00000108797	protein_coding	contactin associated protein 1	CNTNAP1	-0.642441	2.02964	-3.67997	0.000334114	0.00295487	-0.00336355	Yes	Yes	Yes	Yes
ENSG00000214279	protein_coding	scavenger receptor family member expressed on T cells 1	SCART1	-0.612414	1.52826	-3.67564	0.000339317	0.00298397	-0.0174158	Yes	Yes	Yes	Yes
ENSG00000152894	protein_coding	protein tyrosine phosphatase, receptor type K	PTPRK	-0.813845	2.00445	-3.64665	0.000376138	0.00320085	-0.111055	Yes	Yes	Yes	Yes
ENSG00000184226	protein_coding	protocadherin 9	PCDH9	-0.848515	1.21166	-3.64405	0.000379626	0.00321917	-0.119442	Yes	Yes	Yes	Yes
ENSG00000247982	lincRNA	long intergenic non-protein coding RNA 926	LINC00926	-0.781437	4.77812	-3.62858	0.000400966	0.00334666	-0.169118	Yes	Yes	Yes	Yes
ENSG00000132704	protein_coding	Fc receptor like 2	FCRL2	-0.772944	3.78272	-3.61107	0.000426506	0.0034797	-0.225177	Yes	Yes	Yes	Yes
ENSG00000197385	protein_coding	zinc finger protein 860	ZNF860	-0.941689	1.18436	-3.59991	0.000443564	0.00357263	-0.260765	Yes	Yes	Yes	Yes
ENSG00000148848	protein_coding	ADAM metallopeptidase domain 12	ADAM12	-0.796389	0.501192	-3.59899	0.000445005	0.00357507	-0.263709	Yes	Yes	Yes	Yes
ENSG00000167723	protein_coding	transient receptor potential cation channel subfamily V member 3	TRPV3	-0.841589	-0.431132	-3.5728	0.000487749	0.00380593	-0.346888	Yes	Yes	Yes	Yes
ENSG00000196159	protein_coding	FAT atypical cadherin 4	FAT4	-0.980001	-0.177515	-3.56153	0.0005073	0.00389349	-0.382512	Yes	Yes	Yes	Yes
ENSG00000235621	lincRNA	long intergenic non-protein coding RNA 494	LINC00494	-0.810325	0.959128	-3.55789	0.00051378	0.0039207	-0.394016	Yes	Yes	Yes	Yes
ENSG00000136573	protein_coding	BLK proto-oncogene, Src family tyrosine kinase	BLK	-0.657257	4.3437	-3.55353	0.000521631	0.00395832	-0.407757	Yes	Yes	Yes	Yes
ENSG00000165810	protein_coding	butyrophilin like 9	BTNL9	-1.37098	-1.27684	-3.51693	0.000592184	0.00431566	-0.52263	Yes	Yes	Yes	Yes
ENSG00000240137	antisense	ERICH6 antisense RNA 1	ERICH6-AS1	-0.62646	-0.192395	-3.45645	0.000728805	0.00503328	-0.710317	Yes	Yes	Yes	Yes
ENSG00000062524	protein_coding	leukocyte receptor tyrosine kinase	LTK	-0.640531	2.27622	-3.43969	0.000771604	0.00521852	-0.761845	Yes	Yes	Yes	Yes
ENSG00000074527	protein_coding	netrin 4	NTN4	-0.964805	-0.362992	-3.43768	0.000776891	0.00524032	-0.768009	Yes	Yes	Yes	Yes
ENSG00000081052	protein_coding	collagen type IV alpha 4 chain	COL4A4	-0.826722	0.646291	-3.42499	0.000811083	0.00541377	-0.806879	Yes	Yes	Yes	Yes
ENSG00000147180	protein_coding	zinc finger protein 711	ZNF711	-0.72451	0.483836	-3.38409	0.000931104	0.00599118	-0.931304	Yes	Yes	Yes	Yes
ENSG00000204466	protein_coding	Diacylglycerol kinase, kappa	DGKK	-1.08834	0.936333	-3.3637	0.000996963	0.00626662	-0.992857	Yes	Yes	Yes	Yes
ENSG00000169744	protein_coding	LIM domain binding 2	LDB2	-0.930886	-1.10423	-3.35932	0.00101167	0.00633035	-1.00604	Yes	Yes	Yes	Yes
ENSG00000256720	processed_pseudogene	BTG anti-proliferation factor 1 pseudogene 1	BTG1P1	-0.678615	-0.32858	-3.35831	0.00101508	0.00634643	-1.00907	Yes	Yes	Yes	Yes
ENSG00000100985	protein_coding	matrix metallopeptidase 9	MMP9	0.728525	6.67237	3.31759	0.0011623	0.00697749	-1.13089	Yes	Yes	Yes	Yes
ENSG00000163701	protein_coding	interleukin 17 receptor E	IL17RE	-0.783441	-0.548157	-3.30419	0.00121496	0.00715258	-1.17071	Yes	Yes	Yes	Yes
ENSG00000266923	antisense	novel transcript, antisense to CLLU1OS	AC063949.2	-0.736372	2.37036	-3.29109	0.00126858	0.00735168	-1.20949	Yes	Yes	Yes	Yes
ENSG00000159958	protein_coding	TNF receptor superfamily member 13C	TNFRSF13C	-0.686656	1.58059	-3.26629	0.00137623	0.00780324	-1.28259	Yes	Yes	Yes	Yes
ENSG00000162630	protein_coding	beta-1,3-galactosyltransferase 2	B3GALT2	-0.756146	0.959369	-3.26238	0.00139393	0.00786259	-1.29406	Yes	Yes	Yes	Yes
ENSG00000132185	protein_coding	Fc receptor like A	FCRLA	-0.695829	4.60105	-3.23441	0.00152706	0.00834551	-1.37583	Yes	Yes	Yes	Yes
ENSG00000186481	transcribed_unprocessed_pseudogene	ankyrin repeat domain 20 family member A5, pseudogene	ANKRD20A5P	-0.720459	0.064404	-3.22825	0.00155795	0.00845269	-1.39377	Yes	Yes	Yes	Yes
ENSG00000257950	protein_coding	P2RX5-TAX1BP3 readthrough (NMD candidate)	P2RX5-TAX1BP3	-0.719235	0.19091	-3.22238	0.00158793	0.00857258	-1.41084	Yes	Yes	Yes	Yes
ENSG00000167633	protein_coding	killer cell immunoglobulin like receptor, three Ig domains and long cytoplasmic tail 1	KIR3DL1	-0.802329	2.49685	-3.20316	0.00168981	0.00894529	-1.46651	Yes	Yes	Yes	Yes
ENSG00000123096	protein_coding	sarcospan	SSPN	-0.683907	0.170096	-3.16419	0.00191525	0.00967242	-1.57848	Yes	Yes	Yes	Yes
ENSG00000154734	protein_coding	ADAM metallopeptidase with thrombospondin type 1 motif 1	ADAMTS1	-0.712441	2.0222	-3.05371	0.00271524	0.0124847	-1.88954	Yes	Yes	Yes	Yes
ENSG00000123095	protein_coding	basic helix-loop-helix family member e41	BHLHE41	-0.635833	0.924489	-3.03965	0.00283675	0.0128993	-1.92845	Yes	Yes	Yes	Yes
ENSG00000155974	protein_coding	glutamate receptor interacting protein 1	GRIP1	-0.716153	-0.253163	-3.01921	0.00302235	0.0135251	-1.98473	Yes	Yes	Yes	Yes
ENSG00000134121	protein_coding	cell adhesion molecule L1 like	CHL1	-0.890442	-0.882721	-2.98229	0.00338624	0.014704	-2.08554	Yes	Yes	Yes	Yes
ENSG00000211803	TR_V_gene	T cell receptor alpha variable 23/delta variable 6	TRAV23DV6	-0.793061	1.50605	-2.87802	0.00464241	0.0186628	-2.36435	Yes	Yes	Yes	Yes
ENSG00000188848	protein_coding	BEN domain containing 4	BEND4	-0.594514	1.32584	-2.85654	0.00494922	0.0196114	-2.42072	Yes	Yes	Yes	Yes
ENSG00000150625	protein_coding	glycoprotein M6A	GPM6A	-1.07427	-0.524396	-2.85107	0.0050302	0.0198393	-2.435	Yes	Yes	Yes	Yes
ENSG00000128438	transcribed_unprocessed_pseudogene	TBC1 domain family member 27, pseudogene	TBC1D27P	-0.766376	0.560865	-2.80966	0.00568402	0.0216859	-2.54241	Yes	Yes	Yes	Yes
ENSG00000163534	protein_coding	Fc receptor like 1	FCRL1	-0.597505	4.83269	-2.79523	0.00592948	0.0223552	-2.57951	Yes	Yes	Yes	Yes
ENSG00000164047	protein_coding	cathelicidin antimicrobial peptide	CAMP	0.665802	3.57538	2.782	0.0061629	0.0230243	-2.61337	Yes	Yes	Yes	Yes
ENSG00000165949	protein_coding	interferon alpha inducible protein 27	IFI27	1.34051	1.2528	2.7767	0.00625873	0.0233042	-2.62689	Yes	Yes	Yes	Yes
ENSG00000205056	lincRNA	long intergenic non-protein coding RNA 2397	LINC02397	-0.656805	1.34667	-2.77442	0.00630041	0.0233831	-2.63271	Yes	Yes	Yes	Yes
ENSG00000165338	protein_coding	HECT domain E3 ubiquitin protein ligase 2	HECTD2	-0.616565	-0.202355	-2.75628	0.00664079	0.0242736	-2.67879	Yes	Yes	Yes	Yes
ENSG00000174469	protein_coding	contactin associated protein like 2	CNTNAP2	-1.04549	1.68836	-2.72096	0.0073522	0.0262008	-2.76776	Yes	Yes	Yes	Yes
ENSG00000240505	protein_coding	TNF receptor superfamily member 13B	TNFRSF13B	-0.634225	0.732989	-2.67596	0.00835823	0.0289129	-2.8796	Yes	Yes	Yes	Yes
ENSG00000174607	protein_coding	UDP glycosyltransferase 8	UGT8	-0.616444	0.157434	-2.67052	0.00848815	0.029256	-2.89304	Yes	Yes	Yes	Yes
ENSG00000114948	protein_coding	ADAM metallopeptidase domain 23	ADAM23	-0.653562	1.29011	-2.66746	0.0085618	0.0294498	-2.90056	Yes	Yes	Yes	Yes
ENSG00000183960	protein_coding	potassium voltage-gated channel subfamily H member 8	KCNH8	-0.656285	0.548832	-2.66108	0.00871737	0.0298428	-2.91623	Yes	Yes	Yes	Yes
ENSG00000123219	protein_coding	centromere protein K	CENPK	-0.621836	2.33698	-2.66086	0.00872278	0.0298428	-2.91677	Yes	Yes	Yes	Yes
ENSG00000242265	protein_coding	paternally expressed 10	PEG10	-0.643971	1.31523	-2.64154	0.00921013	0.0309936	-2.96403	Yes	Yes	Yes	Yes
ENSG00000103647	protein_coding	coronin 2B	CORO2B	-0.915913	0.560279	-2.63626	0.00934754	0.0313225	-2.9769	Yes	Yes	Yes	Yes
ENSG00000179044	protein_coding	exocyst complex component 3 like 1	EXOC3L1	0.861366	-0.698932	2.61866	0.00981903	0.0324826	-3.01962	Yes	Yes	Yes	Yes
ENSG00000211821	TR_V_gene	T cell receptor delta variable 2	TRDV2	-1.10745	0.821698	-2.61597	0.00989289	0.0326914	-3.02612	Yes	Yes	Yes	Yes
ENSG00000170866	protein_coding	leukocyte immunoglobulin-like receptor, subfamily A	LILRA3	0.715133	5.67718	2.57807	0.0109888	0.0354361	-3.11714	Yes	Yes	Yes	Yes
ENSG00000117281	protein_coding	CD160 molecule	CD160	-0.595059	3.73663	-2.57312	0.0111399	0.0357793	-3.12895	Yes	Yes	Yes	Yes
ENSG00000101425	protein_coding	bactericidal permeability increasing protein	BPI	0.663005	3.73615	2.5025	0.0135049	0.0411938	-3.29503	Yes	Yes	Yes	Yes
ENSG00000251606	protein_coding	Uncharacterized protein	CTD-2215E18.1	-0.717658	-0.925361	-2.42063	0.0168005	0.0488764	-3.48231	Yes	Yes	Yes	Yes
ENSG00000129270	protein_coding	matrix metallopeptidase 28	MM28	-1.90028	-0.297724	-7.17839	4.03e-11	6.13e-07	14.8607	Yes	Yes	Yes	No
ENSG00000251369	protein_coding	zinc finger protein 550	ZNF550	-0.654349	3.58987	-6.70383	4.84e-10	3.68e-06	12.5203	Yes	Yes	Yes	No
ENSG00000232021	processed_transcript	LEF1 antisense RNA 1	LEF1-AS1	-1.22173	0.612452	-6.37734	2.56e-09	6.26e-06	10.9554	Yes	Yes	Yes	No
ENSG00000158427	protein_coding	thymosin beta 15B	TMSB15B	-0.831207	1.00309	-6.3272	3.29e-09	6.26e-06	10.7186	Yes	Yes	Yes	No
ENSG00000080546	protein_coding	sestrin 1	SESN1	-0.611534	5.22752	-6.35603	2.84e-09	6.26e-06	10.8546	Yes	Yes	Yes	No
ENSG00000113319	protein_coding	Ras protein specific guanine nucleotide releasing factor 2	RASGRF2	-0.878846	4.29061	-6.36711	2.69e-09	6.26e-06	10.907	Yes	Yes	Yes	No
ENSG00000183691	protein_coding	noggin	NOG	-1.47348	1.49931	-6.33902	3.1e-09	6.26e-06	10.7743	Yes	Yes	Yes	No
ENSG00000091409	protein_coding	integrin subunit alpha 6	ITGA6	-0.710106	6.19625	-6.44173	1.85e-09	6.26e-06	11.2609	Yes	Yes	Yes	No
ENSG00000228956	processed_transcript	SATB1 antisense RNA 1	SATB1-AS1	-0.861178	2.52509	-6.29964	3.77e-09	6.38e-06	10.5889	Yes	Yes	Yes	No
ENSG00000257151	lincRNA	Prader Willi/Angelman region RNA 6	PWAR6	-0.833449	1.66735	-6.10984	9.68e-09	1.47e-05	9.70376	Yes	Yes	Yes	No
ENSG00000245164	lincRNA	long intergenic non-protein coding RNA 861	LINC00861	-0.720299	6.5307	-6.0806	1.12e-08	1.49e-05	9.56873	Yes	Yes	Yes	No
ENSG00000112394	protein_coding	solute carrier family 16 member 10	SLC16A10	-1.20895	1.63193	-5.99327	1.71e-08	1.74e-05	9.16762	Yes	Yes	Yes	No
ENSG00000174136	protein_coding	repulsive guidance molecule BMP co-receptor b	RGMB	-0.813826	3.29445	-5.89691	2.74e-08	1.82e-05	8.72882	Yes	Yes	Yes	No
ENSG00000102760	protein_coding	regulator of cell cycle	RGCC	-0.633767	4.53086	-5.86583	3.18e-08	1.82e-05	8.5882	Yes	Yes	Yes	No
ENSG00000070087	protein_coding	profilin 2	PFN2	-0.961812	1.27646	-5.96922	1.93e-08	1.82e-05	9.0577	Yes	Yes	Yes	No
ENSG00000152527	protein_coding	pleckstrin homology, MyTH4 and FERM domain containing H2	PLEKHH2	-1.76856	-1.07591	-5.83139	3.75e-08	1.82e-05	8.43282	Yes	Yes	Yes	No
ENSG00000107679	protein_coding	pleckstrin homology domain containing A1	PLEKHA1	-0.669895	5.17807	-5.87015	3.11e-08	1.82e-05	8.60771	Yes	Yes	Yes	No
ENSG00000151623	protein_coding	nuclear receptor subfamily 3 group C member 2	NR3C2	-0.824091	3.61433	-5.87603	3.03e-08	1.82e-05	8.63428	Yes	Yes	Yes	No
ENSG00000105926	protein_coding	membrane palmitoylated protein 6	MPP6	-0.839865	2.70287	-5.90842	2.59e-08	1.82e-05	8.78103	Yes	Yes	Yes	No
ENSG00000157978	protein_coding	low density lipoprotein receptor adaptor protein 1	LDLRAP1	-0.627842	6.8977	-5.91938	2.45e-08	1.82e-05	8.83077	Yes	Yes	Yes	No
ENSG00000029993	protein_coding	high mobility group box 3	HMGB3	0.77504	1.18389	5.82778	3.82e-08	1.82e-05	8.4166	Yes	Yes	Yes	No
ENSG00000181754	protein_coding	adhesion molecule with Ig like domain 1	AMIGO1	-0.7823	4.40046	-5.75075	5.52e-08	2.21e-05	8.07119	Yes	Yes	Yes	No
ENSG00000254837	bidirectional_promoter_lncRNA	uncharacterized LOC100287896	AP001372.2	-0.654448	1.23623	-5.73438	5.97e-08	2.33e-05	7.99815	Yes	Yes	Yes	No
ENSG00000161381	protein_coding	plexin domain containing 1	PLXDC1	-1.1164	3.13224	-5.69401	7.23e-08	2.56e-05	7.81855	Yes	Yes	Yes	No
ENSG00000172508	protein_coding	carnosine synthase 1	CARNS1	-0.80788	2.95739	-5.70575	6.84e-08	2.56e-05	7.87069	Yes	Yes	Yes	No
ENSG00000074966	protein_coding	TXK tyrosine kinase	TXK	-0.663646	5.03654	-5.6766	7.85e-08	2.65e-05	7.74132	Yes	Yes	Yes	No
ENSG00000149582	protein_coding	transmembrane protein 25	TMEM25	-0.642766	2.4514	-5.64424	9.14e-08	3.03e-05	7.59815	Yes	Yes	Yes	No
ENSG00000224078	processed_transcript	small nucleolar RNA host gene 14	SNHG14	-0.651966	4.49031	-5.6147	1.05e-07	3.31e-05	7.46792	Yes	Yes	Yes	No
ENSG00000147231	protein_coding	RPA1 related single stranded DNA binding protein, X-linked	CXorf57	-0.819497	2.03393	-5.61153	1.07e-07	3.31e-05	7.45394	Yes	Yes	Yes	No
ENSG00000100346	protein_coding	calcium voltage-gated channel subunit alpha1 I	CACNA1I	-0.826825	3.95567	-5.61841	1.03e-07	3.31e-05	7.48426	Yes	Yes	Yes	No
ENSG00000171817	protein_coding	zinc finger protein 540	ZNF540	-0.717758	2.59577	-5.59971	1.13e-07	3.43e-05	7.40197	Yes	Yes	Yes	No
ENSG00000204789	processed_pseudogene	zinc finger protein 204, pseudogene	ZNF204P	-0.862211	2.42004	-5.56204	1.35e-07	3.49e-05	7.23678	Yes	Yes	Yes	No
ENSG00000184271	protein_coding	POU class 6 homeobox 1	POU6F1	-0.659527	3.54567	-5.56919	1.3e-07	3.49e-05	7.26809	Yes	Yes	Yes	No
ENSG00000119514	protein_coding	polypeptide N-acetylgalactosaminyltransferase 12	GALNT12	-0.643103	2.5241	-5.58624	1.2e-07	3.49e-05	7.34281	Yes	Yes	Yes	No
ENSG00000181690	protein_coding	PLAG1 zinc finger	PLAG1	-0.727371	2.32032	-5.56062	1.35e-07	3.49e-05	7.23053	Yes	Yes	Yes	No
ENSG00000140545	protein_coding	milk fat globule-EGF factor 8 protein	MFGE8	-0.646383	3.05368	-5.57608	1.26e-07	3.49e-05	7.29824	Yes	Yes	Yes	No
ENSG00000261556	transcribed_unprocessed_pseudogene	SMG1 pseudogene 7	SMG1P7	-0.663765	1.95373	-5.55573	1.39e-07	3.52e-05	7.20914	Yes	Yes	Yes	No
ENSG00000151135	protein_coding	transmembrane protein 263	TMEM263	-0.613182	4.13256	-5.54845	1.43e-07	3.58e-05	7.17731	Yes	Yes	Yes	No
ENSG00000225948	lincRNA	long intergenic non-protein coding RNA 2648	AL158210.1	-1.18763	-0.30615	-5.53422	1.53e-07	3.64e-05	7.11517	Yes	Yes	Yes	No
ENSG00000168661	protein_coding	zinc finger protein 30	ZNF30	-0.619247	2.00052	-5.50478	1.76e-07	3.82e-05	6.98695	Yes	Yes	Yes	No
ENSG00000133131	protein_coding	MORC family CW-type zinc finger 4	MORC4	-0.673923	2.85972	-5.50505	1.75e-07	3.82e-05	6.98812	Yes	Yes	Yes	No
ENSG00000110079	protein_coding	membrane spanning 4-domains A4A	MS4A4A	0.884713	2.79629	5.45815	2.18e-07	4.49e-05	6.7847	Yes	Yes	Yes	No
ENSG00000140470	protein_coding	ADAM metallopeptidase with thrombospondin type 1 motif 17	ADAMTS17	-0.845207	0.238584	-5.43598	2.42e-07	4.66e-05	6.68894	Yes	Yes	Yes	No
ENSG00000021300	protein_coding	pleckstrin homology domain containing B1	PLEKHB1	-0.729783	4.34735	-5.40608	2.77e-07	5.04e-05	6.56017	Yes	Yes	Yes	No
ENSG00000146021	protein_coding	kelch like family member 3	KLHL3	-0.656403	3.15304	-5.40559	2.78e-07	5.04e-05	6.55803	Yes	Yes	Yes	No
ENSG00000099204	protein_coding	actin binding LIM protein 1	ABLIM1	-0.610231	7.4532	-5.39855	2.87e-07	5.14e-05	6.52778	Yes	Yes	Yes	No
ENSG00000183019	protein_coding	mast cell expressed membrane protein 1	MCEMP1	0.839371	4.61815	5.39402	2.93e-07	5.19e-05	6.50832	Yes	Yes	Yes	No
ENSG00000126368	protein_coding	nuclear receptor subfamily 1 group D member 1	NR1D1	-0.674494	3.2732	-5.38668	3.03e-07	5.26e-05	6.47683	Yes	Yes	Yes	No
ENSG00000168056	protein_coding	latent transforming growth factor beta binding protein 3	LTBP3	-0.721206	5.25255	-5.37927	3.14e-07	5.26e-05	6.44505	Yes	Yes	Yes	No
ENSG00000064309	protein_coding	cell adhesion associated, oncogene regulated	CDON	-1.14363	0.0869056	-5.37156	3.25e-07	5.32e-05	6.41203	Yes	Yes	Yes	No
ENSG00000168646	protein_coding	axin 2	AXIN2	-0.790238	3.6292	-5.36446	3.36e-07	5.38e-05	6.38165	Yes	Yes	Yes	No
ENSG00000165521	protein_coding	EMAP like 5	EML5	-0.76891	1.80047	-5.3562	3.49e-07	5.41e-05	6.34631	Yes	Yes	Yes	No
ENSG00000134709	protein_coding	hook microtubule tethering protein 1	HOOK1	-0.849381	2.74783	-5.33371	3.86e-07	5.5e-05	6.25033	Yes	Yes	Yes	No
ENSG00000159445	protein_coding	thioesterase superfamily member 4	THEM4	-0.648496	4.4611	-5.33027	3.92e-07	5.53e-05	6.23566	Yes	Yes	Yes	No
ENSG00000010030	protein_coding	ETS variant 7	ETV7	1.50423	2.20295	5.32789	3.97e-07	5.53e-05	6.22553	Yes	Yes	Yes	No
ENSG00000173611	protein_coding	suppressor of cancer cell invasion	SCAI	-0.598038	2.98487	-5.31269	4.25e-07	5.74e-05	6.16081	Yes	Yes	Yes	No
ENSG00000168685	protein_coding	interleukin 7 receptor	IL7R	-0.666	9.4959	-5.31209	4.26e-07	5.74e-05	6.15827	Yes	Yes	Yes	No
ENSG00000068079	protein_coding	interferon induced protein 35	IFI35	0.761085	5.49344	5.31033	4.3e-07	5.74e-05	6.15078	Yes	Yes	Yes	No
ENSG00000257242	processed_transcript	long intergenic non-protein coding RNA 1619	LINC01619	-0.759611	0.942137	-5.29924	4.52e-07	5.83e-05	6.10367	Yes	Yes	Yes	No
ENSG00000165821	protein_coding	spalt like transcription factor 2	SALL2	-0.752548	1.86951	-5.2971	4.56e-07	5.84e-05	6.09461	Yes	Yes	Yes	No
ENSG00000175414	protein_coding	ADP ribosylation factor like GTPase 10	ARL10	-0.585785	3.23234	-5.28381	4.85e-07	6e-05	6.03825	Yes	Yes	Yes	No
ENSG00000150337	protein_coding	Fc fragment of IgG receptor Ia	FCGR1A	0.968879	5.10912	5.2656	5.26e-07	6.38e-05	5.96118	Yes	Yes	Yes	No
ENSG00000080561	protein_coding	midline 2	MID2	-0.891338	1.52173	-5.24482	5.78e-07	6.62e-05	5.87343	Yes	Yes	Yes	No
ENSG00000272529	antisense	novel transcript, antisense to RFTN1	AC090948.3	-0.832613	0.65516	-5.2047	6.93e-07	7.21e-05	5.70469	Yes	Yes	Yes	No
ENSG00000188171	protein_coding	zinc finger protein 626	ZNF626	-0.677194	2.477	-5.20565	6.9e-07	7.21e-05	5.70867	Yes	Yes	Yes	No
ENSG00000152582	protein_coding	sperm flagellar 2	SPEF2	-0.722392	2.2969	-5.21102	6.73e-07	7.21e-05	5.73122	Yes	Yes	Yes	No
ENSG00000187116	protein_coding	leukocyte immunoglobulin like receptor A5	LILRA5	0.656283	6.82859	5.20599	6.89e-07	7.21e-05	5.71013	Yes	Yes	Yes	No
ENSG00000002549	protein_coding	leucine aminopeptidase 3	LAP3	0.809343	6.25028	5.21063	6.75e-07	7.21e-05	5.72958	Yes	Yes	Yes	No
ENSG00000169508	protein_coding	G protein-coupled receptor 183	GPR183	-0.659534	6.00083	-5.19779	7.15e-07	7.23e-05	5.67571	Yes	Yes	Yes	No
ENSG00000225151	transcribed_unprocessed_pseudogene	GOLGA2 pseudogene 7	GOLGA2P7	-0.760053	2.31532	-5.1974	7.16e-07	7.23e-05	5.67409	Yes	Yes	Yes	No
ENSG00000152495	protein_coding	calcium/calmodulin dependent protein kinase IV	CAMK4	-0.715154	5.70897	-5.19056	7.38e-07	7.39e-05	5.64541	Yes	Yes	Yes	No
ENSG00000144935	protein_coding	transient receptor potential cation channel subfamily C member 1	TRPC1	-0.870485	0.879326	-5.18844	7.45e-07	7.42e-05	5.63655	Yes	Yes	Yes	No
ENSG00000185875	protein_coding	threonine synthase like 1	THNSL1	-0.63319	2.4613	-5.16345	8.34e-07	7.88e-05	5.53209	Yes	Yes	Yes	No
ENSG00000127152	protein_coding	BCL11B, BAF complex component	BCL11B	-0.611676	6.61067	-5.16222	8.38e-07	7.88e-05	5.52695	Yes	Yes	Yes	No
ENSG00000136153	protein_coding	LIM domain 7	LMO7	-0.659252	3.62078	-5.12746	9.79e-07	8.72e-05	5.38223	Yes	Yes	Yes	No
ENSG00000266904	lincRNA	long intergenic non-protein coding RNA 663	LINC00663	-0.820406	0.733715	-5.1216	1e-06	8.74e-05	5.35791	Yes	Yes	Yes	No
ENSG00000118922	protein_coding	Kruppel like factor 12	KLF12	-0.614387	6.09328	-5.1211	1.01e-06	8.74e-05	5.3558	Yes	Yes	Yes	No
ENSG00000135424	protein_coding	integrin subunit alpha 7	ITGA7	0.746047	0.357829	5.12025	1.01e-06	8.74e-05	5.35231	Yes	Yes	Yes	No
ENSG00000166313	protein_coding	amyloid beta precursor protein binding family B member 1	APBB1	-0.616249	5.09761	-5.12083	1.01e-06	8.74e-05	5.35471	Yes	Yes	Yes	No
ENSG00000154027	protein_coding	adenylate kinase 5	AK5	-0.920109	2.9335	-5.11657	1.03e-06	8.84e-05	5.33701	Yes	Yes	Yes	No
ENSG00000272316	lincRNA	novel transcript	AL021368.2	-0.742869	2.05659	-5.1082	1.07e-06	8.92e-05	5.30232	Yes	Yes	Yes	No
ENSG00000126217	protein_coding	MCF.2 cell line derived transforming sequence like	MCF2L	-0.630858	2.29165	-5.07454	1.24e-06	9.63e-05	5.16314	Yes	Yes	Yes	No
ENSG00000119699	protein_coding	transforming growth factor beta 3	TGFB3	-0.74217	0.883981	-5.0644	1.3e-06	9.86e-05	5.12134	Yes	Yes	Yes	No
ENSG00000247287	antisense	novel transcript, antisense to PRKCH	AL359220.1	-0.804527	0.775292	-5.05774	1.33e-06	9.96e-05	5.09391	Yes	Yes	Yes	No
ENSG00000267278	antisense	MAP3K14 antisense RNA 1	MAP3K14-AS1	-0.667714	1.18848	-5.05744	1.34e-06	9.96e-05	5.09266	Yes	Yes	Yes	No
ENSG00000171860	protein_coding	complement C3a receptor 1	C3AR1	0.654039	5.65156	5.05645	1.34e-06	9.96e-05	5.08861	Yes	Yes	Yes	No
ENSG00000186854	protein_coding	TraB domain containing 2A	TRABD2A	-0.763172	5.35187	-5.05403	1.36e-06	0.000100194	5.07867	Yes	Yes	Yes	No
ENSG00000214999	antisense	novel transcript, antisense to ALOX12B	AC129492.1	-0.79159	0.127225	-5.05103	1.37e-06	0.000100828	5.06631	Yes	Yes	Yes	No
ENSG00000167106	protein_coding	family with sequence similarity 102 member A	FAM102A	-0.619543	7.07458	-5.04875	1.39e-06	0.000101087	5.05693	Yes	Yes	Yes	No
ENSG00000237943	processed_transcript	PRKCQ antisense RNA 1	PRKCQ-AS1	-0.604319	4.49189	-5.04524	1.41e-06	0.00010169	5.04251	Yes	Yes	Yes	No
ENSG00000173114	protein_coding	leucine rich repeat neuronal 3	LRRN3	-1.60021	3.43865	-5.04216	1.43e-06	0.000102595	5.02986	Yes	Yes	Yes	No
ENSG00000123612	protein_coding	activin A receptor type 1C	ACVR1C	-0.927676	1.27891	-5.02852	1.52e-06	0.00010793	4.97387	Yes	Yes	Yes	No
ENSG00000188313	protein_coding	phospholipid scramblase 1	PLSCR1	0.79235	6.13997	5.02553	1.54e-06	0.000108345	4.96163	Yes	Yes	Yes	No
ENSG00000151882	protein_coding	C-C motif chemokine ligand 28	CCL28	-0.612715	2.71275	-5.02593	1.53e-06	0.000108345	4.96323	Yes	Yes	Yes	No
ENSG00000120915	protein_coding	epoxide hydrolase 2	EPHX2	-0.724358	3.81907	-5.00597	1.68e-06	0.000114364	4.88156	Yes	Yes	Yes	No
ENSG00000047634	protein_coding	Scm polycomb group protein like 1	SCML1	-0.648556	2.52813	-5.00265	1.7e-06	0.000115267	4.86797	Yes	Yes	Yes	No
ENSG00000161298	protein_coding	zinc finger protein 382	ZNF382	-0.643923	1.9069	-4.99637	1.75e-06	0.000117183	4.84232	Yes	Yes	Yes	No
ENSG00000141696	protein_coding	prolyl 3-hydroxylase family member 4 (non-enzymatic)	P3H4	-0.688141	0.810235	-4.99323	1.77e-06	0.000117836	4.82951	Yes	Yes	Yes	No
ENSG00000254539	lincRNA	novel transcript	AC239804.1	-0.854804	0.146639	-4.98673	1.82e-06	0.000120379	4.80298	Yes	Yes	Yes	No
ENSG00000171451	protein_coding	dermatan sulfate epimerase like	DSEL	-0.964605	0.993025	-4.98482	1.84e-06	0.000120379	4.79521	Yes	Yes	Yes	No
ENSG00000238105	transcribed_unprocessed_pseudogene	GOLGA2 pseudogene 5	GOLGA2P5	-0.631166	2.83598	-4.96786	1.98e-06	0.00012769	4.72617	Yes	Yes	Yes	No
ENSG00000128536	protein_coding	cadherin related family member 3	CDHR3	-0.891697	0.585651	-4.95265	2.12e-06	0.000135309	4.66436	Yes	Yes	Yes	No
ENSG00000138795	protein_coding	lymphoid enhancer binding factor 1	LEF1	-0.677004	7.37037	-4.9444	2.19e-06	0.000139217	4.63092	Yes	Yes	Yes	No
ENSG00000150045	protein_coding	killer cell lectin like receptor F1	KLRF1	-0.855302	4.60521	-4.93183	2.32e-06	0.000140904	4.57999	Yes	Yes	Yes	No
ENSG00000117602	protein_coding	RCAN family member 3	RCAN3	-0.643474	6.89299	-4.92416	2.39e-06	0.000144087	4.54898	Yes	Yes	Yes	No
ENSG00000072071	protein_coding	adhesion G protein-coupled receptor L1	ADGRL1	-0.691653	3.06122	-4.92185	2.42e-06	0.000144397	4.53965	Yes	Yes	Yes	No
ENSG00000142303	protein_coding	ADAM metallopeptidase with thrombospondin type 1 motif 10	ADAMTS10	-0.80234	2.87775	-4.91996	2.44e-06	0.000144459	4.53201	Yes	Yes	Yes	No
ENSG00000157077	protein_coding	zinc finger FYVE-type containing 9	ZFYVE9	-0.757161	1.79595	-4.91638	2.48e-06	0.000145581	4.51757	Yes	Yes	Yes	No
ENSG00000197124	protein_coding	zinc finger protein 682	ZNF682	-0.598546	1.40114	-4.91287	2.51e-06	0.000146681	4.50341	Yes	Yes	Yes	No
ENSG00000196867	protein_coding	ZFP28 zinc finger protein	ZFP28	-0.691442	2.21353	-4.89421	2.73e-06	0.000154849	4.42819	Yes	Yes	Yes	No
ENSG00000133106	protein_coding	epithelial stromal interaction 1	EPSTI1	1.18377	5.67691	4.89158	2.76e-06	0.000155338	4.4176	Yes	Yes	Yes	No
ENSG00000248124	transcribed_unprocessed_pseudogene	RRN3 homolog, RNA polymerase I transcription factor pseudogene 1	RRN3P1	-0.598356	2.89563	-4.88905	2.79e-06	0.000155343	4.40743	Yes	Yes	Yes	No
ENSG00000198019	protein_coding	Fc fragment of IgG receptor Ib	FCGR1B	0.832492	4.84392	4.88322	2.86e-06	0.00015714	4.38399	Yes	Yes	Yes	No
ENSG00000211713	TR_V_gene	T cell receptor beta variable 6-4	TRBV6-4	-1.19492	-0.783455	-4.85734	3.2e-06	0.000168843	4.28015	Yes	Yes	Yes	No
ENSG00000160856	protein_coding	Fc receptor like 3	FCRL3	-0.700625	5.81745	-4.84849	3.32e-06	0.000173743	4.24474	Yes	Yes	Yes	No
ENSG00000136014	protein_coding	ubiquitin specific peptidase 44	USP44	-0.877356	1.20303	-4.84625	3.35e-06	0.000174778	4.23579	Yes	Yes	Yes	No
ENSG00000270189	lincRNA	RP11-258C19.7	RP11-258C19.7	-0.676226	1.72588	-4.84305	3.4e-06	0.000175438	4.22303	Yes	Yes	Yes	No
ENSG00000135960	protein_coding	ectodysplasin A receptor	EDAR	-0.995623	2.3765	-4.83368	3.54e-06	0.000180809	4.18559	Yes	Yes	Yes	No
ENSG00000132849	protein_coding	PATJ, crumbs cell polarity complex component	PATJ	-0.608447	4.23672	-4.81529	3.83e-06	0.000187467	4.11229	Yes	Yes	Yes	No
ENSG00000189283	protein_coding	fragile histidine triad	FHIT	-0.950625	3.60691	-4.80936	3.93e-06	0.000189244	4.0887	Yes	Yes	Yes	No
ENSG00000008277	protein_coding	ADAM metallopeptidase domain 22	ADAM22	-0.675939	1.58748	-4.80433	4.01e-06	0.000189498	4.0687	Yes	Yes	Yes	No
ENSG00000162772	protein_coding	activating transcription factor 3	ATF3	0.929277	1.45879	4.78764	4.31e-06	0.00019884	4.00247	Yes	Yes	Yes	No
ENSG00000258405	protein_coding	zinc finger protein 578	ZNF578	-0.7929	0.591097	-4.7717	4.61e-06	0.000205947	3.93939	Yes	Yes	Yes	No
ENSG00000271918	antisense	novel transcript, antisense to COMMD10	AC034236.2	-0.875224	-0.905868	-4.76234	4.8e-06	0.00020762	3.90238	Yes	Yes	Yes	No
ENSG00000174292	protein_coding	tyrosine kinase non receptor 1	TNK1	-0.838362	0.937919	-4.76459	4.75e-06	0.00020762	3.91129	Yes	Yes	Yes	No
ENSG00000185339	protein_coding	transcobalamin 2	TCN2	0.75925	3.41932	4.76239	4.8e-06	0.00020762	3.9026	Yes	Yes	Yes	No
ENSG00000177989	protein_coding	outer dense fiber of sperm tails 3B	ODF3B	0.854098	4.27488	4.7662	4.72e-06	0.00020762	3.91762	Yes	Yes	Yes	No
ENSG00000124466	protein_coding	LY6/PLAUR domain containing 3	LYPD3	-0.763087	0.246573	-4.7657	4.73e-06	0.00020762	3.91565	Yes	Yes	Yes	No
ENSG00000104290	protein_coding	frizzled class receptor 3	FZD3	-0.63825	1.32731	-4.76509	4.74e-06	0.00020762	3.91325	Yes	Yes	Yes	No
ENSG00000183662	protein_coding	family with sequence similarity 19 member A1, C-C motif chemokine like	FAM19A1	-0.915991	0.587465	-4.76274	4.79e-06	0.00020762	3.90398	Yes	Yes	Yes	No
ENSG00000146856	protein_coding	ATP/GTP binding protein like 3	AGBL3	-0.882477	-0.565852	-4.75103	5.04e-06	0.000211837	3.85776	Yes	Yes	Yes	No
ENSG00000081059	protein_coding	transcription factor 7	TCF7	-0.62613	8.25785	-4.74111	5.25e-06	0.000219111	3.81869	Yes	Yes	Yes	No
ENSG00000186462	protein_coding	nucleosome assembly protein 1 like 2	NAP1L2	-0.616037	2.40581	-4.74005	5.28e-06	0.000219497	3.81451	Yes	Yes	Yes	No
ENSG00000164241	protein_coding	chromosome 5 open reading frame 63	C5orf63	-0.589105	1.67232	-4.73457	5.4e-06	0.000222231	3.79293	Yes	Yes	Yes	No
ENSG00000264098	antisense	CTD-2350C19.1	CTD-2350C19.1	-0.776264	0.0377996	-4.73326	5.43e-06	0.000222814	3.78778	Yes	Yes	Yes	No
ENSG00000256553	TR_V_gene	T cell receptor alpha variable 1-2	TRAV1-2	-0.981948	1.6304	-4.73119	5.48e-06	0.000223621	3.77964	Yes	Yes	Yes	No
ENSG00000185267	protein_coding	cerebral dopamine neurotrophic factor	CDNF	-1.05317	-0.875172	-4.7263	5.59e-06	0.000227683	3.76045	Yes	Yes	Yes	No
ENSG00000146904	protein_coding	EPH receptor A1	EPHA1	-0.674851	3.29731	-4.71622	5.84e-06	0.000232624	3.72088	Yes	Yes	Yes	No
ENSG00000251595	transcribed_processed_pseudogene	ATP binding cassette subfamily A member 11, pseudogene	ABCA11P	-0.808304	0.968251	-4.711	5.97e-06	0.000237186	3.70042	Yes	Yes	Yes	No
ENSG00000205930	antisense	C21orf62 antisense RNA 1	C21orf62-AS1	-0.769242	0.0516286	-4.70984	6e-06	0.00023773	3.69588	Yes	Yes	Yes	No
ENSG00000196911	protein_coding	karyopherin subunit alpha 5	KPNA5	-0.619878	3.58347	-4.69852	6.29e-06	0.00024262	3.65156	Yes	Yes	Yes	No
ENSG00000132623	protein_coding	ankyrin repeat and EF-hand domain containing 1	ANKEF1	-0.655961	2.19357	-4.69461	6.39e-06	0.000242754	3.63627	Yes	Yes	Yes	No
ENSG00000246790	antisense	novel transcript, antisense to SORL1	AP000977.1	-0.948342	-0.373966	-4.69275	6.44e-06	0.000244056	3.629	Yes	Yes	Yes	No
ENSG00000231528	lincRNA	family with sequence similarity 225 member A	FAM225A	1.11794	1.5097	4.68184	6.75e-06	0.000251153	3.58639	Yes	Yes	Yes	No
ENSG00000111331	protein_coding	2'-5'-oligoadenylate synthetase 3	OAS3	1.34329	7.31647	4.68004	6.8e-06	0.000251274	3.57938	Yes	Yes	Yes	No
ENSG00000269911	sense_intronic	family with sequence similarity 226 member B	FAM226B	-0.716617	0.741065	-4.6801	6.8e-06	0.000251274	3.57958	Yes	Yes	Yes	No
ENSG00000170264	protein_coding	FAM161A, centrosomal protein	FAM161A	-0.757021	0.04222	-4.67719	6.88e-06	0.000252851	3.56825	Yes	Yes	Yes	No
ENSG00000025708	protein_coding	thymidine phosphorylase	TYMP	0.628517	7.48166	4.66749	7.17e-06	0.000258327	3.53047	Yes	Yes	Yes	No
ENSG00000106624	protein_coding	AE binding protein 1	AEBP1	-0.756852	2.98227	-4.6556	7.53e-06	0.000268574	3.48423	Yes	Yes	Yes	No
ENSG00000249459	protein_coding	zinc finger protein 286B	ZNF286B	-0.732107	1.22235	-4.6474	7.8e-06	0.000274111	3.45237	Yes	Yes	Yes	No
ENSG00000166707	protein_coding	zinc finger CCHC-type containing 18	ZCCHC18	-0.732579	1.25806	-4.64197	7.98e-06	0.000276573	3.43132	Yes	Yes	Yes	No
ENSG00000233355	processed_transcript	CHRM3 antisense RNA 2	CHRM3-AS2	-0.846661	4.07618	-4.63833	8.1e-06	0.000280176	3.4172	Yes	Yes	Yes	No
ENSG00000204475	protein_coding	natural cytotoxicity triggering receptor 3	NCR3	-0.585975	3.93263	-4.62748	8.47e-06	0.000288582	3.37517	Yes	Yes	Yes	No
ENSG00000176928	protein_coding	glucosaminyl (N-acetyl) transferase 4	GCNT4	-0.736794	2.80242	-4.62532	8.55e-06	0.000289255	3.3668	Yes	Yes	Yes	No
ENSG00000134765	protein_coding	desmocollin 1	DSC1	-1.2216	1.25104	-4.62041	8.73e-06	0.000294188	3.34785	Yes	Yes	Yes	No
ENSG00000126353	protein_coding	C-C motif chemokine receptor 7	CCR7	-0.691216	7.38096	-4.61771	8.83e-06	0.000295953	3.33738	Yes	Yes	Yes	No
ENSG00000157827	protein_coding	formin like 2	FMNL2	0.713607	2.43813	4.59898	9.54e-06	0.000309259	3.26514	Yes	Yes	Yes	No
ENSG00000198780	protein_coding	family with sequence similarity 169 member A	FAM169A	-0.662954	3.15223	-4.59882	9.55e-06	0.000309259	3.26452	Yes	Yes	Yes	No
ENSG00000131634	protein_coding	transmembrane protein 204	TMEM204	-0.704496	4.18683	-4.59476	9.71e-06	0.000312944	3.24889	Yes	Yes	Yes	No
ENSG00000138311	protein_coding	zinc finger protein 365	ZNF365	-0.956766	0.692982	-4.58715	1e-05	0.000316098	3.21961	Yes	Yes	Yes	No
ENSG00000196793	protein_coding	zinc finger protein 239	ZNF239	-0.723127	0.85179	-4.58698	1e-05	0.000316098	3.21898	Yes	Yes	Yes	No
ENSG00000065717	protein_coding	TLE family member 2, transcriptional corepressor	TLE2	-0.72855	2.09415	-4.58503	1.01e-05	0.000317395	3.21146	Yes	Yes	Yes	No
ENSG00000148468	protein_coding	family with sequence similarity 171 member A1	FAM171A1	-0.661599	2.59853	-4.57513	1.05e-05	0.000325949	3.17344	Yes	Yes	Yes	No
ENSG00000182983	protein_coding	zinc finger protein 662	ZNF662	-0.974256	0.299377	-4.56297	1.11e-05	0.000337957	3.12685	Yes	Yes	Yes	No
ENSG00000260711	sense_intronic	novel transcript, intronic to CATSPERB	AL121839.2	-0.676188	2.37083	-4.55945	1.12e-05	0.000342227	3.11336	Yes	Yes	Yes	No
ENSG00000140092	protein_coding	fibulin 5	FBLN5	-0.850507	3.11214	-4.55792	1.13e-05	0.000343169	3.10748	Yes	Yes	Yes	No
ENSG00000149970	protein_coding	connector enhancer of kinase suppressor of Ras 2	CNKSR2	-0.807436	1.54765	-4.55182	1.16e-05	0.000349007	3.08415	Yes	Yes	Yes	No
ENSG00000145390	protein_coding	ubiquitin specific peptidase 53	USP53	-0.688226	4.134	-4.54849	1.18e-05	0.000353139	3.07142	Yes	Yes	Yes	No
ENSG00000171766	protein_coding	glycine amidinotransferase	GATM	-0.730096	1.40051	-4.5347	1.24e-05	0.000364447	3.0188	Yes	Yes	Yes	No
ENSG00000159899	protein_coding	natriuretic peptide receptor 2	NPR2	-0.65562	1.08251	-4.53389	1.25e-05	0.000364959	3.01572	Yes	Yes	Yes	No
ENSG00000162913	antisense	OBSCN antisense RNA 1	OBSCN-AS1	-0.964061	-0.566936	-4.52705	1.28e-05	0.000372527	2.98964	Yes	Yes	Yes	No
ENSG00000197880	lincRNA	myelodysplastic syndrome 2 translocation associated	MDS2	-0.91924	0.768029	-4.51899	1.33e-05	0.0003811	2.95896	Yes	Yes	Yes	No
ENSG00000155970	protein_coding	mitochondrial calcium uptake family member 3	MICU3	-0.912235	-0.166812	-4.51287	1.36e-05	0.000387492	2.93572	Yes	Yes	Yes	No
ENSG00000089127	protein_coding	2'-5'-oligoadenylate synthetase 1	OAS1	0.986498	6.81747	4.50815	1.39e-05	0.000393608	2.91778	Yes	Yes	Yes	No
ENSG00000034053	protein_coding	amyloid beta precursor protein binding family A member 2	APBA2	-0.630305	4.82677	-4.50378	1.41e-05	0.000399237	2.9012	Yes	Yes	Yes	No
ENSG00000225032	antisense	novel transcript	AL162586.1	-0.707304	1.41195	-4.49129	1.49e-05	0.000413011	2.85385	Yes	Yes	Yes	No
ENSG00000246430	lincRNA	long intergenic non-protein coding RNA 968	LINC00968	0.625887	0.532073	4.48929	1.5e-05	0.000413011	2.84631	Yes	Yes	Yes	No
ENSG00000245146	antisense	mitosis associated long intergenic non-coding RNA 1	MALINC1	-0.663773	0.448071	-4.48755	1.51e-05	0.00041512	2.83971	Yes	Yes	Yes	No
ENSG00000244701	antisense	novel transcript, antisense to AGK	AC004918.1	-0.664867	1.1442	-4.48446	1.53e-05	0.000417378	2.82803	Yes	Yes	Yes	No
ENSG00000145911	protein_coding	NEDD4 binding protein 3	N4BP3	-0.794229	1.79317	-4.48159	1.55e-05	0.000418307	2.81715	Yes	Yes	Yes	No
ENSG00000169245	protein_coding	C-X-C motif chemokine ligand 10	CXCL10	1.13564	1.35128	4.4828	1.54e-05	0.000418307	2.82174	Yes	Yes	Yes	No
ENSG00000182463	protein_coding	teashirt zinc finger homeobox 2	TSHZ2	-0.827536	2.8758	-4.47869	1.57e-05	0.000420333	2.80622	Yes	Yes	Yes	No
ENSG00000137962	protein_coding	Rho GTPase activating protein 29	ARHGAP29	0.841086	0.190578	4.47628	1.58e-05	0.00042174	2.79711	Yes	Yes	Yes	No
ENSG00000246223	lincRNA	long intergenic non-protein coding RNA 1550	LINC01550	-0.603638	2.54297	-4.46699	1.64e-05	0.000433373	2.76203	Yes	Yes	Yes	No
ENSG00000198932	protein_coding	G protein-coupled receptor associated sorting protein 1	GPRASP1	-0.686802	4.38986	-4.4574	1.71e-05	0.00044611	2.72593	Yes	Yes	Yes	No
ENSG00000137501	protein_coding	synaptotagmin like 2	SYTL2	-0.642042	4.647	-4.45696	1.71e-05	0.000446111	2.72424	Yes	Yes	Yes	No
ENSG00000166405	protein_coding	RIC3 acetylcholine receptor chaperone	RIC3	-0.708968	2.50936	-4.45614	1.72e-05	0.000446111	2.72118	Yes	Yes	Yes	No
ENSG00000166278	protein_coding	complement C2	C2	0.919562	2.69486	4.44511	1.8e-05	0.000463635	2.67967	Yes	Yes	Yes	No
ENSG00000164292	protein_coding	Rho related BTB domain containing 3	RHOBTB3	-0.585484	1.79267	-4.44261	1.81e-05	0.000465538	2.67029	Yes	Yes	Yes	No
ENSG00000270012	lincRNA	novel transcript	AC232271.1	-0.622955	1.41149	-4.43522	1.87e-05	0.000475166	2.64256	Yes	Yes	Yes	No
ENSG00000124615	protein_coding	molybdenum cofactor synthesis 1	MOCS1	-1.2548	-0.995552	-4.43422	1.88e-05	0.000476304	2.63881	Yes	Yes	Yes	No
ENSG00000270015	sense_intronic	novel transcript, sense intronic to FAN1	AC087481.3	-0.612412	1.78857	-4.41752	2.01e-05	0.000496989	2.57625	Yes	Yes	Yes	No
ENSG00000185697	protein_coding	MYB proto-oncogene like 1	MYBL1	-0.651481	4.92625	-4.41352	2.04e-05	0.000501433	2.56131	Yes	Yes	Yes	No
ENSG00000113555	protein_coding	protocadherin 12	PCDH12	0.731985	0.683826	4.40823	2.09e-05	0.000509362	2.54153	Yes	Yes	Yes	No
ENSG00000103494	protein_coding	RPGRIP1 like	RPGRIP1L	-0.627631	1.27491	-4.3989	2.17e-05	0.000519209	2.50674	Yes	Yes	Yes	No
ENSG00000182107	protein_coding	transmembrane protein 30B	TMEM30B	-0.700402	1.17242	-4.39387	2.21e-05	0.000525061	2.48798	Yes	Yes	Yes	No
ENSG00000155980	protein_coding	kinesin family member 5A	KIF5A	-0.790307	-0.509449	-4.38738	2.27e-05	0.000533804	2.46382	Yes	Yes	Yes	No
ENSG00000143167	protein_coding	glycoprotein A33	GPA33	-0.604757	3.30649	-4.38168	2.32e-05	0.000542102	2.44261	Yes	Yes	Yes	No
ENSG00000079385	protein_coding	carcinoembryonic antigen related cell adhesion molecule 1	CEACAM1	0.65125	5.11282	4.38094	2.33e-05	0.000542806	2.43985	Yes	Yes	Yes	No
ENSG00000180938	protein_coding	zinc finger protein 572	ZNF572	-0.595093	0.865159	-4.37736	2.36e-05	0.00054859	2.42657	Yes	Yes	Yes	No
ENSG00000067840	protein_coding	PDZ domain containing 4	PDZD4	-0.658186	4.31031	-4.37303	2.4e-05	0.000555251	2.41047	Yes	Yes	Yes	No
ENSG00000070018	protein_coding	LDL receptor related protein 6	LRP6	-0.843874	1.37996	-4.36641	2.47e-05	0.000563375	2.38592	Yes	Yes	Yes	No
ENSG00000112182	protein_coding	BTB domain and CNC homolog 2	BACH2	-0.678592	5.69993	-4.35696	2.56e-05	0.000577359	2.35091	Yes	Yes	Yes	No
ENSG00000120756	protein_coding	plastin 1	PLS1	-0.73998	0.620482	-4.3554	2.58e-05	0.000578415	2.34513	Yes	Yes	Yes	No
ENSG00000115423	protein_coding	dynein axonemal heavy chain 6	DNAH6	-1.05268	0.108203	-4.35403	2.59e-05	0.00058074	2.34007	Yes	Yes	Yes	No
ENSG00000162545	protein_coding	calcium/calmodulin dependent protein kinase II inhibitor 1	CAMK2N1	-0.706703	0.945671	-4.35251	2.61e-05	0.000581726	2.33444	Yes	Yes	Yes	No
ENSG00000185920	protein_coding	patched 1	PTCH1	-0.649733	4.52402	-4.35112	2.62e-05	0.000584109	2.32932	Yes	Yes	Yes	No
ENSG00000140398	protein_coding	nei like DNA glycosylase 1	NEIL1	-0.598964	2.39573	-4.34947	2.64e-05	0.000585427	2.3232	Yes	Yes	Yes	No
ENSG00000166762	protein_coding	cation channel sperm associated 2	CATSPER2	-0.653297	1.41123	-4.34712	2.67e-05	0.000587156	2.31451	Yes	Yes	Yes	No
ENSG00000204314	protein_coding	proline rich transmembrane protein 1	PRRT1	-0.927732	0.0960714	-4.34433	2.7e-05	0.000589879	2.30419	Yes	Yes	Yes	No
ENSG00000166342	protein_coding	neuropilin and tolloid like 1	NETO1	-1.15247	-0.684925	-4.33974	2.75e-05	0.000596995	2.28726	Yes	Yes	Yes	No
ENSG00000174500	protein_coding	germinal center associated signaling and motility	GCSAM	-0.600254	4.08972	-4.33565	2.79e-05	0.00060207	2.27215	Yes	Yes	Yes	No
ENSG00000257495	antisense	KRT73 antisense RNA 1	KRT73-AS1	-1.28562	-0.714247	-4.32114	2.96e-05	0.000617829	2.21873	Yes	Yes	Yes	No
ENSG00000196172	protein_coding	zinc finger protein 681	ZNF681	-0.591876	2.36849	-4.31967	2.98e-05	0.000619782	2.21329	Yes	Yes	Yes	No
ENSG00000269834	processed_transcript	ZNF528 antisense RNA 1	ZNF528-AS1	-0.943436	0.174168	-4.31084	3.08e-05	0.000634162	2.18084	Yes	Yes	Yes	No
ENSG00000101842	protein_coding	V-set and immunoglobulin domain containing 1	VSIG1	-0.642652	3.55433	-4.30603	3.14e-05	0.000641219	2.16319	Yes	Yes	Yes	No
ENSG00000253193	processed_pseudogene	Fc fragment of IgG, high affinity Ic, receptor (CD64), pseudogene	FCGR1C	1.02696	2.84769	4.29514	3.28e-05	0.00066022	2.12329	Yes	Yes	Yes	No
ENSG00000144451	protein_coding	sperm associated antigen 16	SPAG16	-0.61944	1.07573	-4.29411	3.29e-05	0.00066081	2.1195	Yes	Yes	Yes	No
ENSG00000171224	protein_coding	family with sequence similarity 241 member B	FAM241B	-0.709707	0.529577	-4.26492	3.7e-05	0.000716333	2.0129	Yes	Yes	Yes	No
ENSG00000272977	sense_intronic	novel transcript	AL008721.2	-0.644242	0.522625	-4.2474	3.96e-05	0.000749943	1.94915	Yes	Yes	Yes	No
ENSG00000261589	lincRNA	CTC-462L7.1	CTC-462L7.1	-0.651912	0.471671	-4.24052	4.07e-05	0.000759724	1.9242	Yes	Yes	Yes	No
ENSG00000229590	processed_pseudogene	msh homeobox 2 pseudogene 1	MSX2P1	-0.673678	0.25906	-4.22333	4.36e-05	0.000792729	1.86195	Yes	Yes	Yes	No
ENSG00000178038	protein_coding	ALS2 C-terminal like	ALS2CL	-0.608547	3.40396	-4.22309	4.36e-05	0.000792729	1.86107	Yes	Yes	Yes	No
ENSG00000157404	protein_coding	KIT proto-oncogene receptor tyrosine kinase	KIT	-0.596297	2.03491	-4.21838	4.44e-05	0.000802935	1.84406	Yes	Yes	Yes	No
ENSG00000085465	protein_coding	oviductal glycoprotein 1	OVGP1	-0.674181	1.23528	-4.2165	4.48e-05	0.000807219	1.83727	Yes	Yes	Yes	No
ENSG00000254682	antisense	novel transcript	AP002387.2	-0.755463	1.84784	-4.21585	4.49e-05	0.000807222	1.83492	Yes	Yes	Yes	No
ENSG00000211791	TR_V_gene	T cell receptor alpha variable 13-2	TRAV13-2	-0.628577	1.38358	-4.21398	4.52e-05	0.000810265	1.82815	Yes	Yes	Yes	No
ENSG00000173369	protein_coding	complement C1q B chain	C1QB	1.18716	0.97667	4.21207	4.55e-05	0.000811969	1.82127	Yes	Yes	Yes	No
ENSG00000171476	protein_coding	HOP homeobox	HOPX	-0.655439	4.54722	-4.21031	4.59e-05	0.00081313	1.81493	Yes	Yes	Yes	No
ENSG00000271964	antisense	novel transcript, antisense to RFTN1	AC090948.1	-0.819645	-0.166347	-4.19504	4.87e-05	0.000841276	1.7599	Yes	Yes	Yes	No
ENSG00000224631	transcribed_processed_pseudogene	ribosomal protein S27a pseudogene 16	RPS27AP16	-0.627279	3.44221	-4.18692	5.02e-05	0.000861357	1.73073	Yes	Yes	Yes	No
ENSG00000171033	protein_coding	cAMP-dependent protein kinase inhibitor alpha	PKIA	-0.612874	3.50205	-4.18484	5.07e-05	0.000866453	1.72324	Yes	Yes	Yes	No
ENSG00000088881	protein_coding	EBF family member 4	EBF4	-0.792539	0.276231	-4.18359	5.09e-05	0.000868711	1.71877	Yes	Yes	Yes	No
ENSG00000236901	sense_intronic	MIR600 host gene	MIR600HG	-0.726703	3.04835	-4.17761	5.21e-05	0.000878652	1.69729	Yes	Yes	Yes	No
ENSG00000178809	protein_coding	tripartite motif containing 73	TRIM73	-0.734691	0.860515	-4.17576	5.25e-05	0.000879852	1.69069	Yes	Yes	Yes	No
ENSG00000238241	transcribed_unprocessed_pseudogene	C-C motif chemokine receptor 12, pseudogene	CCR12P	-1.11504	-0.186157	-4.17402	5.28e-05	0.000880992	1.68445	Yes	Yes	Yes	No
ENSG00000273226	antisense	novel transcript, antisense to RPS6	AL391834.2	-0.835282	-0.0431231	-4.15809	5.62e-05	0.000904321	1.62745	Yes	Yes	Yes	No
ENSG00000164114	protein_coding	microtubule associated protein 9	MAP9	-0.635254	1.82925	-4.15876	5.61e-05	0.000904321	1.62983	Yes	Yes	Yes	No
ENSG00000173295	transcribed_unprocessed_pseudogene	family with sequence similarity 86 member B3, pseudogene	FAM86B3P	-0.791977	0.222188	-4.15923	5.6e-05	0.000904321	1.63149	Yes	Yes	Yes	No
ENSG00000226711	antisense	family with sequence similarity 66 member C	FAM66C	-0.723977	0.0116976	-4.15674	5.65e-05	0.000905569	1.62259	Yes	Yes	Yes	No
ENSG00000198237	unprocessed_pseudogene	glucuronidase, beta (GUSB) pseudogene	AC131392.1	-1.50999	-0.702451	-4.15443	5.7e-05	0.000909885	1.61435	Yes	Yes	Yes	No
ENSG00000162415	protein_coding	zinc finger SWIM-type containing 5	ZSWIM5	-0.671075	1.33396	-4.15214	5.75e-05	0.000914184	1.60617	Yes	Yes	Yes	No
ENSG00000109654	protein_coding	tripartite motif containing 2	TRIM2	-0.679064	1.47007	-4.15248	5.74e-05	0.000914184	1.60741	Yes	Yes	Yes	No
ENSG00000268804	lincRNA	long intergenic non-protein coding RNA 2132	LINC02132	-0.982714	-0.534836	-4.14922	5.82e-05	0.000919782	1.59577	Yes	Yes	Yes	No
ENSG00000260496	lincRNA	novel transcript	AC009041.1	-0.936706	-0.267124	-4.14291	5.96e-05	0.000935772	1.57326	Yes	Yes	Yes	No
ENSG00000178075	protein_coding	GRAM domain containing 1C	GRAMD1C	-0.612456	3.12129	-4.13359	6.18e-05	0.00095928	1.54008	Yes	Yes	Yes	No
ENSG00000197093	protein_coding	galactose-3-O-sulfotransferase 4	GAL3ST4	-0.623273	2.61439	-4.13258	6.21e-05	0.00096106	1.5365	Yes	Yes	Yes	No
ENSG00000112218	protein_coding	G protein-coupled receptor 63	GPR63	-0.960062	-0.797838	-4.1239	6.42e-05	0.000979912	1.50565	Yes	Yes	Yes	No
ENSG00000179088	protein_coding	chromosome 12 open reading frame 42	C12orf42	-0.754181	0.316945	-4.12224	6.46e-05	0.000985224	1.49976	Yes	Yes	Yes	No
ENSG00000168229	protein_coding	prostaglandin D2 receptor	PTGDR	-0.63098	3.16347	-4.1151	6.64e-05	0.00100578	1.47443	Yes	Yes	Yes	No
ENSG00000187922	protein_coding	lipocalin 10	LCN10	-0.864945	2.08929	-4.11118	6.74e-05	0.00101397	1.46053	Yes	Yes	Yes	No
ENSG00000143365	protein_coding	RAR related orphan receptor C	RORC	-0.767913	2.58306	-4.10719	6.84e-05	0.00102359	1.44642	Yes	Yes	Yes	No
ENSG00000111879	protein_coding	family with sequence similarity 184 member A	FAM184A	-0.742643	0.79104	-4.10626	6.87e-05	0.00102625	1.44313	Yes	Yes	Yes	No
ENSG00000273081	lincRNA	RP4-813F11.4	RP4-813F11.4	-0.660992	0.52931	-4.10461	6.91e-05	0.00103078	1.43728	Yes	Yes	Yes	No
ENSG00000124613	protein_coding	zinc finger protein 391	ZNF391	-0.698215	1.18508	-4.0994	7.05e-05	0.00104347	1.41887	Yes	Yes	Yes	No
ENSG00000186310	protein_coding	nucleosome assembly protein 1 like 3	NAP1L3	-0.628738	1.90905	-4.09953	7.05e-05	0.00104347	1.41932	Yes	Yes	Yes	No
ENSG00000231154	antisense	MORF4L2 antisense RNA 1	MORF4L2-AS1	-0.905932	-0.67638	-4.09889	7.07e-05	0.0010445	1.41707	Yes	Yes	Yes	No
ENSG00000117228	protein_coding	guanylate binding protein 1	GBP1	0.667881	7.44625	4.09476	7.18e-05	0.00105276	1.40248	Yes	Yes	Yes	No
ENSG00000121690	protein_coding	DEP domain containing 7	DEPDC7	-0.947488	-0.283735	-4.09388	7.2e-05	0.00105323	1.39937	Yes	Yes	Yes	No
ENSG00000197763	protein_coding	thioredoxin reductase 3	TXNRD3	-0.73395	-0.191651	-4.08663	7.41e-05	0.00107283	1.37379	Yes	Yes	Yes	No
ENSG00000114107	protein_coding	centrosomal protein 70	CEP70	-0.622414	1.47252	-4.08295	7.51e-05	0.00108107	1.36082	Yes	Yes	Yes	No
ENSG00000102934	protein_coding	plasmolipin	PLLP	-1.06312	-0.808321	-4.07757	7.67e-05	0.0010974	1.34186	Yes	Yes	Yes	No
ENSG00000271738	lincRNA	RP11-137H2.6	RP11-137H2.6	-0.726857	-0.552106	-4.07373	7.78e-05	0.00110741	1.32837	Yes	Yes	Yes	No
ENSG00000038945	protein_coding	macrophage scavenger receptor 1	MSR1	0.863499	2.13328	4.06887	7.93e-05	0.00111723	1.31126	Yes	Yes	Yes	No
ENSG00000162614	protein_coding	nexilin F-actin binding protein	NEXN	0.600507	2.46485	4.06389	8.08e-05	0.00113506	1.29379	Yes	Yes	Yes	No
ENSG00000270157	sense_intronic	novel transcript	AC004918.3	-0.670453	0.393203	-4.06315	8.1e-05	0.00113724	1.29118	Yes	Yes	Yes	No
ENSG00000185272	protein_coding	RNA binding motif protein 11	RBM11	-0.771846	0.0915504	-4.05746	8.28e-05	0.00115379	1.27121	Yes	Yes	Yes	No
ENSG00000235532	lincRNA	long intergenic non-protein coding RNA 402	LINC00402	-0.761802	2.8255	-4.05453	8.38e-05	0.00116033	1.26096	Yes	Yes	Yes	No
ENSG00000178947	protein_coding	small integral membrane protein 10 like 2A	SMIM10L2A	-0.878922	-0.347985	-4.03685	8.96e-05	0.00122454	1.1991	Yes	Yes	Yes	No
ENSG00000136514	protein_coding	receptor transporter protein 4	RTP4	0.66402	3.65341	4.03328	9.08e-05	0.00123682	1.18665	Yes	Yes	Yes	No
ENSG00000177409	protein_coding	sterile alpha motif domain containing 9 like	SAMD9L	0.60427	7.50276	4.03155	9.14e-05	0.00124168	1.1806	Yes	Yes	Yes	No
ENSG00000130489	protein_coding	SCO2, cytochrome c oxidase assembly protein	SCO2	0.662861	4.33491	4.02962	9.21e-05	0.00124746	1.17388	Yes	Yes	Yes	No
ENSG00000124256	protein_coding	Z-DNA binding protein 1	ZBP1	0.599163	5.32773	4.02721	9.29e-05	0.00125115	1.16548	Yes	Yes	Yes	No
ENSG00000260807	lincRNA	novel transcript	AC009041.2	-0.862906	2.02928	-4.01481	9.74e-05	0.00127673	1.1223	Yes	Yes	Yes	No
ENSG00000139173	protein_coding	transmembrane protein 117	TMEM117	-0.6549	0.447688	-4.01489	9.74e-05	0.00127673	1.12258	Yes	Yes	Yes	No
ENSG00000167664	protein_coding	transmembrane and immunoglobulin domain containing 2	TMIGD2	-0.714465	2.56081	-4.01476	9.74e-05	0.00127673	1.12212	Yes	Yes	Yes	No
ENSG00000164512	protein_coding	ankyrin repeat domain 55	ANKRD55	-0.640732	2.75179	-4.01533	9.72e-05	0.00127673	1.12411	Yes	Yes	Yes	No
ENSG00000072195	protein_coding	striated muscle enriched protein kinase	SPEG	-0.780428	0.548113	-4.00853	9.98e-05	0.00130052	1.10047	Yes	Yes	Yes	No
ENSG00000170629	transcribed_unprocessed_pseudogene	DPY19L2 pseudogene 2	DPY19L2P2	-0.62924	0.88779	-4.00347	0.000101708	0.00132229	1.08289	Yes	Yes	Yes	No
ENSG00000197928	protein_coding	zinc finger protein 677	ZNF677	-0.598141	2.26879	-3.99883	0.000103507	0.00134109	1.06682	Yes	Yes	Yes	No
ENSG00000196141	protein_coding	spermatogenesis associated serine rich 2 like	SPATS2L	0.802407	3.00296	3.99641	0.000104459	0.00134564	1.05843	Yes	Yes	Yes	No
ENSG00000079215	protein_coding	solute carrier family 1 member 3	SLC1A3	0.818234	0.26211	3.99671	0.000104342	0.00134564	1.05946	Yes	Yes	Yes	No
ENSG00000142794	protein_coding	NBPF member 3	NBPF3	-0.60829	3.25783	-3.99183	0.000106281	0.0013574	1.04258	Yes	Yes	Yes	No
ENSG00000184515	protein_coding	brain expressed X-linked 5	BEX5	-0.729102	0.459154	-3.98792	0.000107863	0.00136956	1.02903	Yes	Yes	Yes	No
ENSG00000107282	protein_coding	amyloid beta precursor protein binding family A member 1	APBA1	-0.718704	0.167782	-3.98362	0.000109627	0.00138594	1.01417	Yes	Yes	Yes	No
ENSG00000092096	protein_coding	solute carrier family 22 member 17	SLC22A17	-0.783112	1.2494	-3.9812	0.000110633	0.0013936	1.0058	Yes	Yes	Yes	No
ENSG00000135114	protein_coding	2'-5'-oligoadenylate synthetase like	OASL	0.919196	5.36104	3.97239	0.000114364	0.00142477	0.975411	Yes	Yes	Yes	No
ENSG00000260398	sense_overlapping	novel transcript, overlapping to PKIA	AC068700.1	-1.04026	-1.0767	-3.97006	0.00011537	0.00143496	0.967382	Yes	Yes	Yes	No
ENSG00000188227	protein_coding	zinc finger protein 793	ZNF793	-0.625983	1.81789	-3.95018	0.000124316	0.00152443	0.898981	Yes	Yes	Yes	No
ENSG00000221890	protein_coding	neuronal pentraxin receptor	NPTXR	-0.59197	2.86016	-3.93845	0.0001299	0.00156629	0.858752	Yes	Yes	Yes	No
ENSG00000145428	protein_coding	ring finger protein 175	RNF175	-0.911739	-0.265766	-3.93695	0.00013063	0.00157053	0.853621	Yes	Yes	Yes	No
ENSG00000166341	protein_coding	dachsous cadherin-related 1	DCHS1	-0.701537	3.33917	-3.9351	0.000131537	0.00157477	0.847288	Yes	Yes	Yes	No
ENSG00000255221	protein_coding	caspase recruitment domain family member 17	CARD17	0.91233	-0.519914	3.93468	0.000131745	0.00157556	0.845842	Yes	Yes	Yes	No
ENSG00000179909	protein_coding	zinc finger protein 154	ZNF154	-0.707751	2.81495	-3.92693	0.000135616	0.00160048	0.819333	Yes	Yes	Yes	No
ENSG00000117519	protein_coding	calponin 3	CNN3	-0.719432	0.688839	-3.92488	0.000136657	0.00160518	0.812339	Yes	Yes	Yes	No
ENSG00000211792	TR_V_gene	T cell receptor alpha variable 14/delta variable 4	TRAV14DV4	-0.803819	1.7103	-3.92313	0.000137553	0.00161334	0.806355	Yes	Yes	Yes	No
ENSG00000197467	protein_coding	collagen type XIII alpha 1 chain	COL13A1	-1.24931	-1.03209	-3.91729	0.000140583	0.0016353	0.786416	Yes	Yes	Yes	No
ENSG00000135047	protein_coding	cathepsin L	CTSL	0.621244	3.65903	3.91215	0.000143298	0.00165899	0.768915	Yes	Yes	Yes	No
ENSG00000131797	transcribed_unprocessed_pseudogene	clustered mitochondria homolog pseudogene 3	CLUHP3	-0.597745	3.32331	-3.90909	0.000144942	0.0016712	0.758479	Yes	Yes	Yes	No
ENSG00000142235	protein_coding	lemur tyrosine kinase 3	LMTK3	-0.663206	1.25578	-3.90232	0.00014864	0.0016976	0.735435	Yes	Yes	Yes	No
ENSG00000186049	protein_coding	keratin 73	KRT73	-1.2338	1.26123	-3.89431	0.00015313	0.00173133	0.70822	Yes	Yes	Yes	No
ENSG00000272498	antisense	novel transcript, antisense to RFTN1	AC090948.2	-0.697319	0.361689	-3.89153	0.000154718	0.00174156	0.69878	Yes	Yes	Yes	No
ENSG00000100311	protein_coding	platelet derived growth factor subunit B	PDGFB	-0.588621	2.13307	-3.88666	0.00015754	0.00176352	0.682257	Yes	Yes	Yes	No
ENSG00000173482	protein_coding	protein tyrosine phosphatase, receptor type M	PTPRM	-0.732386	2.79835	-3.8864	0.000157687	0.00176388	0.681399	Yes	Yes	Yes	No
ENSG00000271997	sense intronic	RP11-97O12.6	RP11-97O12.6	-0.670025	0.0443772	-3.8861	0.000157865	0.00176456	0.68037	Yes	Yes	Yes	No
ENSG00000271858	antisense	novel transcript, antisense to CACNA2D2	Z84492.1	-0.609816	0.58303	-3.88317	0.000159589	0.00177861	0.67044	Yes	Yes	Yes	No
ENSG00000104177	protein_coding	myelin expression factor 2	MYEF2	-0.592042	2.13404	-3.87498	0.000164503	0.00181741	0.642716	Yes	Yes	Yes	No
ENSG00000108950	protein_coding	FAM20A, golgi associated secretory pathway pseudokinase	FAM20A	1.1934	-0.271573	3.86763	0.000169033	0.00185268	0.617884	Yes	Yes	Yes	No
ENSG00000184613	protein_coding	neural EGFL like 2	NELL2	-0.680887	6.14579	-3.85875	0.000174663	0.00190004	0.587947	Yes	Yes	Yes	No
ENSG00000184911	protein_coding	DMRT like family C1B	DMRTC1B	-1.02931	-0.842868	-3.84735	0.00018216	0.00195159	0.549548	Yes	Yes	Yes	No
ENSG00000127903	protein_coding	zinc finger protein 835	ZNF835	-0.748744	-0.173417	-3.83735	0.00018898	0.00200072	0.515979	Yes	Yes	Yes	No
ENSG00000170089	transcribed_unprocessed_pseudogene	THO complex 3 (THOC3) pseudogene	AC106795.1	-0.613185	3.95919	-3.83264	0.000192282	0.00202959	0.50016	Yes	Yes	Yes	No
ENSG00000174171	antisense	novel transcript, antisense to SPTBN5	AC020659.1	-0.754	2.11076	-3.82718	0.000196171	0.00205682	0.481881	Yes	Yes	Yes	No
ENSG00000211814	TR_V_pseudogene	T cell receptor alpha variable 35	TRAV35	-0.739524	0.349	-3.81507	0.000205065	0.00211798	0.441403	Yes	Yes	Yes	No
ENSG00000171992	protein_coding	synaptopodin	SYNPO	-0.727544	2.21565	-3.80483	0.000212888	0.00217663	0.407235	Yes	Yes	Yes	No
ENSG00000052126	protein_coding	pleckstrin homology domain containing A5	PLEKHA5	-0.592014	2.25829	-3.80395	0.000213579	0.00218076	0.40428	Yes	Yes	Yes	No
ENSG00000198865	protein_coding	coiled-coil domain containing 152	CCDC152	-0.689497	0.878279	-3.80339	0.000214015	0.00218376	0.402416	Yes	Yes	Yes	No
ENSG00000170485	protein_coding	neuronal PAS domain protein 2	NPAS2	-0.979637	0.372597	-3.80095	0.000215931	0.00220035	0.394286	Yes	Yes	Yes	No
ENSG00000197409	protein_coding	histone cluster 1 H3 family member d	HIST1H3D	0.816973	0.197858	3.79523	0.000220477	0.00223769	0.375278	Yes	Yes	Yes	No
ENSG00000169992	protein_coding	neuroligin 2	NLGN2	-0.605272	1.63771	-3.79264	0.000222572	0.00224697	0.366652	Yes	Yes	Yes	No
ENSG00000132530	protein_coding	XIAP associated factor 1	XAF1	0.80116	6.94458	3.77583	0.000236605	0.00234222	0.310888	Yes	Yes	Yes	No
ENSG00000129422	protein_coding	microtubule associated scaffold protein 1	MTUS1	-0.922036	1.7363	-3.77438	0.000237861	0.0023499	0.306061	Yes	Yes	Yes	No
ENSG00000108771	protein_coding	DExH-box helicase 58	DHX58	0.591354	4.66056	3.76601	0.000245192	0.00240516	0.278387	Yes	Yes	Yes	No
ENSG00000264885	sense_intronic	novel transcript	AC026271.3	-0.801029	0.0775272	-3.76552	0.000245628	0.00240788	0.276769	Yes	Yes	Yes	No
ENSG00000145555	protein_coding	myosin X	MYO10	0.775615	0.523294	3.76423	0.000246781	0.00241313	0.272501	Yes	Yes	Yes	No
ENSG00000000971	protein_coding	complement factor H	CFH	-0.800963	2.57268	-3.76421	0.000246797	0.00241313	0.27244	Yes	Yes	Yes	No
ENSG00000133401	protein_coding	PDZ domain containing 2	PDZD2	-0.845732	-0.624722	-3.75152	0.000258402	0.00248982	0.230563	Yes	Yes	Yes	No
ENSG00000112796	protein_coding	ectonucleotide pyrophosphatase/phosphodiesterase 5 (putative)	ENPP5	-0.655652	1.91736	-3.74925	0.000260526	0.00250052	0.223104	Yes	Yes	Yes	No
ENSG00000244479	antisense	OR2A1 antisense RNA 1	OR2A1-AS1	-0.606056	1.83122	-3.74459	0.000264957	0.00252738	0.207738	Yes	Yes	Yes	No
ENSG00000228205	processed_pseudogene	ribosomal protein S3 (RPS3) pseudogene	AC131235.1	-0.701685	-0.587121	-3.73608	0.000273213	0.00257229	0.179786	Yes	Yes	Yes	No
ENSG00000119922	protein_coding	interferon induced protein with tetratricopeptide repeats 2	IFIT2	0.778104	8.55095	3.7357	0.000273593	0.00257427	0.178522	Yes	Yes	Yes	No
ENSG00000247746	protein_coding	ubiquitin specific peptidase 51	USP51	-0.624542	0.593545	-3.73513	0.00027415	0.00257792	0.176669	Yes	Yes	Yes	No
ENSG00000169429	protein_coding	C-X-C motif chemokine ligand 8	CXCL8	-0.69809	3.76614	-3.73071	0.000278552	0.00260644	0.16216	Yes	Yes	Yes	No
ENSG00000251578	TR_V_pseudogene	T cell receptor beta variable 21-1 (pseudogene)	TRBV21-1	-1.00776	-0.597043	-3.73082	0.000278447	0.00260644	0.162502	Yes	Yes	Yes	No
ENSG00000133424	protein_coding	LARGE xylosyl- and glucuronyltransferase 1	LARGE1	-0.910789	1.77145	-3.72546	0.000283864	0.00264315	0.144957	Yes	Yes	Yes	No
ENSG00000233913	processed_pseudogene	ribosomal protein L10 pseudogene 9	RPL10P9	-0.739294	0.834334	-3.72294	0.000286453	0.00265801	0.136692	Yes	Yes	Yes	No
ENSG00000123610	protein_coding	TNF alpha induced protein 6	TNFAIP6	0.717354	4.52637	3.71933	0.000290193	0.00268077	0.124878	Yes	Yes	Yes	No
ENSG00000173406	protein_coding	DAB1, reelin adaptor protein	DAB1	-0.896957	-0.348079	-3.71604	0.00029365	0.00270449	0.1141	Yes	Yes	Yes	No
ENSG00000224934	bidirectional_promoter_lncRNA	novel transcript	AL391684.1	-0.761091	-0.450869	-3.71308	0.000296781	0.00272509	0.104443	Yes	Yes	Yes	No
ENSG00000260261	transcribed_unprocessed_pseudogene	programmed cell death 6 (PDCD6) pseudogene	AC124944.3	-0.585098	0.573537	-3.70658	0.000303785	0.00276605	0.0832119	Yes	Yes	Yes	No
ENSG00000111335	protein_coding	2'-5'-oligoadenylate synthetase 2	OAS2	0.707935	7.80977	3.70481	0.000305718	0.00277783	0.0774413	Yes	Yes	Yes	No
ENSG00000177707	protein_coding	nectin cell adhesion molecule 3	NECTIN3	-0.762861	0.0968587	-3.69521	0.000316415	0.00284531	0.046146	Yes	Yes	Yes	No
ENSG00000235823	lincRNA	oligodendrocyte maturation-associated long intergenic non-coding RNA	OLMALINC	-0.631215	-0.134119	-3.692	0.000320065	0.00287473	0.0357119	Yes	Yes	Yes	No
ENSG00000111199	protein_coding	transient receptor potential cation channel subfamily V member 4	TRPV4	0.75873	-0.465864	3.69091	0.000321313	0.00288085	0.03217	Yes	Yes	Yes	No
ENSG00000174028	processed_pseudogene	family with sequence similarity 3 member C2 (pseudogene)	FAM3C2	-1.00054	1.31451	-3.68588	0.00032714	0.0029108	0.0158216	Yes	Yes	Yes	No
ENSG00000172215	protein_coding	C-X-C motif chemokine receptor 6	CXCR6	-0.744494	3.08635	-3.66745	0.000349353	0.00304162	-0.0439169	Yes	Yes	Yes	No
ENSG00000166126	protein_coding	amnion associated transmembrane protein	AMN	-0.74004	-0.145337	-3.66723	0.000349635	0.00304162	-0.0446493	Yes	Yes	Yes	No
ENSG00000137338	protein_coding	piggyBac transposable element derived 1	PGBD1	-0.602046	0.13953	-3.66627	0.000350829	0.00304679	-0.0477493	Yes	Yes	Yes	No
ENSG00000138646	protein_coding	HECT and RLD domain containing E3 ubiquitin protein ligase 5	HERC5	1.03269	5.70782	3.65695	0.000362642	0.00312443	-0.0778526	Yes	Yes	Yes	No
ENSG00000166527	protein_coding	C-type lectin domain family 4 member D	CLEC4D	0.605653	4.33325	3.65355	0.000367044	0.00315521	-0.0888166	Yes	Yes	Yes	No
ENSG00000256271	antisense	CACNA1C antisense RNA 2	CACNA1C-AS2	-0.601562	0.0807256	-3.65117	0.000370161	0.00317484	-0.0965022	Yes	Yes	Yes	No
ENSG00000118402	protein_coding	ELOVL fatty acid elongase 4	ELOVL4	-0.743248	0.708848	-3.65096	0.000370439	0.00317543	-0.0971838	Yes	Yes	Yes	No
ENSG00000163520	protein_coding	fibulin 2	FBLN2	-0.747844	0.57846	-3.64905	0.00037295	0.0031844	-0.103321	Yes	Yes	Yes	No
ENSG00000135951	protein_coding	testis specific 10	TSGA10	-0.612114	1.22146	-3.64394	0.000379771	0.00321917	-0.11979	Yes	Yes	Yes	No
ENSG00000174928	protein_coding	chromosome 3 open reading frame 33	C3orf33	-0.638181	0.205283	-3.63814	0.000387652	0.00327322	-0.138447	Yes	Yes	Yes	No
ENSG00000240875	lincRNA	long intergenic non-protein coding RNA 886	LINC00886	-0.681991	0.177421	-3.63036	0.00039846	0.00333305	-0.163423	Yes	Yes	Yes	No
ENSG00000145908	protein_coding	zinc finger protein 300	ZNF300	-0.596302	1.34362	-3.62659	0.000403803	0.0033644	-0.17552	Yes	Yes	Yes	No
ENSG00000240954	processed_pseudogene	ribosomal protein L4 pseudogene 1	RPL4P1	-0.67315	0.050775	-3.62484	0.000406294	0.00337137	-0.181104	Yes	Yes	Yes	No
ENSG00000163995	protein_coding	actin binding LIM protein family member 2	ABLIM2	-0.655856	-0.381959	-3.62456	0.000406694	0.00337137	-0.181998	Yes	Yes	Yes	No
ENSG00000215105	processed_pseudogene	tetratricopeptide repeat domain 3 pseudogene 1	TTC3P1	-0.653846	-0.322043	-3.61734	0.00041718	0.00342011	-0.205109	Yes	Yes	Yes	No
ENSG00000142156	protein_coding	collagen type VI alpha 1 chain	COL6A1	-0.850844	0.671648	-3.61678	0.000418017	0.00342277	-0.206929	Yes	Yes	Yes	No
ENSG00000176490	protein_coding	DIRAS family GTPase 1	DIRAS1	-0.879919	-0.450078	-3.60814	0.000430915	0.00350628	-0.234512	Yes	Yes	Yes	No
ENSG00000003249	protein_coding	dysbindin domain containing 1	DBNDD1	-0.797728	1.5808	-3.60567	0.000434682	0.00352563	-0.242412	Yes	Yes	Yes	No
ENSG00000184731	protein_coding	family with sequence similarity 110 member C	FAM110C	-0.886299	-0.524129	-3.60075	0.000442253	0.00357181	-0.25808	Yes	Yes	Yes	No
ENSG00000121753	protein_coding	adhesion G protein-coupled receptor B2	ADGRB2	-0.648082	0.0338203	-3.59558	0.000450354	0.00359716	-0.274548	Yes	Yes	Yes	No
ENSG00000110811	protein_coding	prolyl 3-hydroxylase 3	P3H3	-0.80632	-0.0881569	-3.59048	0.000458484	0.00364489	-0.290778	Yes	Yes	Yes	No
ENSG00000212127	protein_coding	taste 2 receptor member 14	TAS2R14	-0.714744	-0.0788682	-3.59028	0.000458814	0.00364561	-0.291431	Yes	Yes	Yes	No
ENSG00000225964	antisense	negative regulator of interferon response	NRIR	1.23855	-0.369439	3.58754	0.000463242	0.00367503	-0.300142	Yes	Yes	Yes	No
ENSG00000169855	protein_coding	roundabout guidance receptor 1	ROBO1	-1.03849	-1.07294	-3.56826	0.000495544	0.00383462	-0.361262	Yes	Yes	Yes	No
ENSG00000111863	protein_coding	androgen dependent TFPI regulating protein	ADTRP	-0.761276	2.76538	-3.563	0.000504716	0.00388659	-0.377884	Yes	Yes	Yes	No
ENSG00000231233	antisense	CFAP58 divergent transcript	CFAP58-AS1	0.668582	1.39829	3.56032	0.00050944	0.0039052	-0.386328	Yes	Yes	Yes	No
ENSG00000211752	TR_V_gene	T cell receptor beta variable 27	TRBV27	-0.6702	2.12125	-3.55536	0.000518317	0.00394542	-0.401981	Yes	Yes	Yes	No
ENSG00000129474	protein_coding	ajuba LIM protein	AJUBA	-0.699512	-0.689284	-3.54639	0.000534735	0.00401961	-0.430234	Yes	Yes	Yes	No
ENSG00000104918	protein_coding	resistin	RETN	0.693826	1.63258	3.53427	0.000557709	0.0041504	-0.468333	Yes	Yes	Yes	No
ENSG00000011028	protein_coding	mannose receptor C type 2	MRC2	-0.672189	1.08579	-3.53201	0.000562091	0.00417021	-0.475419	Yes	Yes	Yes	No
ENSG00000211777	TR_V_gene	T cell receptor alpha variable 3 (gene/pseudogene)	TRAV3	-0.679773	1.57655	-3.53073	0.000564594	0.00418064	-0.479443	Yes	Yes	Yes	No
ENSG00000050030	protein_coding	neurite extension and migration factor	NEXMIF	-0.824166	-0.166172	-3.52978	0.000566446	0.00418824	-0.482407	Yes	Yes	Yes	No
ENSG00000211807	TR_V_gene	T cell receptor alpha variable 26-1	TRAV26-1	-0.609371	1.80911	-3.52433	0.000577235	0.00424328	-0.499489	Yes	Yes	Yes	No
ENSG00000250251	transcribed_unprocessed_pseudogene	polycystin 1, transient receptor potential channel interacting pseudogene 6	PKD1P6	-0.740385	2.43293	-3.52177	0.000582368	0.00426629	-0.507502	Yes	Yes	Yes	No
ENSG00000139547	protein_coding	retinol dehydrogenase 16	RDH16	-0.701653	-0.61975	-3.51726	0.000591511	0.00431464	-0.5216	Yes	Yes	Yes	No
ENSG00000160191	protein_coding	phosphodiesterase 9A	PDE9A	-0.73715	1.44334	-3.51557	0.000594988	0.00432781	-0.526905	Yes	Yes	Yes	No
ENSG00000153832	protein_coding	F-box protein 36	FBXO36	-0.72322	-0.708722	-3.50949	0.000607599	0.00439903	-0.545884	Yes	Yes	Yes	No
ENSG00000258210	processed_transcript	novel transcript	AC144548.1	-1.3071	-0.977189	-3.5052	0.000616653	0.00444504	-0.559266	Yes	Yes	Yes	No
ENSG00000176293	protein_coding	zinc finger protein 135	ZNF135	-0.613126	0.67287	-3.49854	0.000630941	0.0045254	-0.579986	Yes	Yes	Yes	No
ENSG00000270074	lincRNA	novel transcript	AC087203.3	-0.833725	-0.659953	-3.49751	0.00063319	0.00453632	-0.583205	Yes	Yes	Yes	No
ENSG00000158966	protein_coding	cache domain containing 1	CACHD1	-0.785835	0.284129	-3.49586	0.000636803	0.0045515	-0.58835	Yes	Yes	Yes	No
ENSG00000139610	protein_coding	chymotrypsin like elastase family member 1	CELA1	-0.890252	-0.43718	-3.48974	0.000650326	0.00462643	-0.607353	Yes	Yes	Yes	No
ENSG00000170486	protein_coding	keratin 72	KRT72	-1.20144	2.04259	-3.4776	0.000677986	0.00477854	-0.645008	Yes	Yes	Yes	No
ENSG00000267128	antisense	RNF157 antisense RNA 1	RNF157-AS1	-0.872561	-0.522068	-3.47555	0.000682755	0.00480513	-0.651344	Yes	Yes	Yes	No
ENSG00000240291	antisense	novel transcript, antisense to CACNB2	AL450384.2	-0.644088	0.152456	-3.47365	0.000687218	0.00482797	-0.657233	Yes	Yes	Yes	No
ENSG00000211706	TR_V_gene	T cell receptor beta variable 6-1	TRBV6-1	-0.628177	1.77035	-3.47213	0.000690807	0.0048487	-0.661939	Yes	Yes	Yes	No
ENSG00000225492	transcribed_unprocessed_pseudogene	guanylate binding protein 1 pseudogene 1	GBP1P1	1.14306	-0.514557	3.47058	0.000694464	0.00486321	-0.666711	Yes	Yes	Yes	No
ENSG00000162512	protein_coding	syndecan 3	SDC3	0.601645	2.13389	3.46407	0.00071009	0.0049464	-0.686817	Yes	Yes	Yes	No
ENSG00000125148	protein_coding	metallothionein 2A	MT2A	0.652603	4.06062	3.45796	0.000725069	0.00502191	-0.705674	Yes	Yes	Yes	No
ENSG00000185507	protein_coding	interferon regulatory factor 7	IRF7	0.617402	5.60892	3.45612	0.000729627	0.00503528	-0.711334	Yes	Yes	Yes	No
ENSG00000227354	antisense	RBM26 antisense RNA 1	RBM26-AS1	-0.684263	0.0802382	-3.45597	0.000730004	0.00503561	-0.711801	Yes	Yes	Yes	No
ENSG00000211753	TR_V_gene	T cell receptor beta variable 28	TRBV28	-1.01135	2.77397	-3.44628	0.000754502	0.00515092	-0.74161	Yes	Yes	Yes	No
ENSG00000176160	protein_coding	heat shock transcription factor 5	HSF5	-0.702319	0.568957	-3.44084	0.000768593	0.00521058	-0.758315	Yes	Yes	Yes	No
ENSG00000182230	protein_coding	family with sequence similarity 153 member B	FAM153B	-0.875586	2.35705	-3.44005	0.000770655	0.00521442	-0.760733	Yes	Yes	Yes	No
ENSG00000257497	antisense	novel transcript, antisense to GLIPR1	AC121761.1	-0.734298	-0.0390642	-3.42816	0.000802418	0.00537914	-0.797187	Yes	Yes	Yes	No
ENSG00000269988	antisense	RP11-395P17.11	RP11-395P17.11	-0.609689	-0.457012	-3.41993	0.000825104	0.00547815	-0.822341	Yes	Yes	Yes	No
ENSG00000165905	protein_coding	LARGE xylosyl- and glucuronyltransferase 2	LARGE2	-0.598697	2.15083	-3.41695	0.000833467	0.00552403	-0.831438	Yes	Yes	Yes	No
ENSG00000196648	protein_coding	Golgin A6 family-like 20	GOLGA6L20	-0.935926	1.55054	-3.41657	0.00083454	0.00552633	-0.832598	Yes	Yes	Yes	No
ENSG00000231621	antisense	novel transcript	AC013264.1	-0.723728	0.531154	-3.40942	0.000854946	0.00563206	-0.854386	Yes	Yes	Yes	No
ENSG00000007350	protein_coding	transketolase like 1	TKTL1	-0.609055	2.58756	-3.4038	0.000871316	0.00569404	-0.871488	Yes	Yes	Yes	No
ENSG00000205959	lincRNA	novel transcript	AC105345.1	-0.774191	-1.04269	-3.40243	0.000875355	0.00570724	-0.875658	Yes	Yes	Yes	No
ENSG00000258511	lincRNA	long intergenic non-protein coding RNA 2295	LINC02295	-0.847131	-1.21039	-3.39985	0.000883014	0.00573936	-0.883511	Yes	Yes	Yes	No
ENSG00000204934	antisense	ATP6V0E2 antisense RNA 1	ATP6V0E2-AS1	-0.592062	0.937077	-3.38857	0.000917191	0.00591917	-0.917738	Yes	Yes	Yes	No
ENSG00000154764	protein_coding	Wnt family member 7A	WNT7A	-0.73022	0.99832	-3.38434	0.000930318	0.00598865	-0.930543	Yes	Yes	Yes	No
ENSG00000179750	protein_coding	apolipoprotein B mRNA editing enzyme catalytic subunit 3B	APOBEC3B	1.20386	3.01957	3.37792	0.000950589	0.00607802	-0.949961	Yes	Yes	Yes	No
ENSG00000245498	antisense	novel transcript, antisense to C11orf61	AP000866.1	-0.768302	-0.681186	-3.37687	0.000953944	0.00608595	-0.953135	Yes	Yes	Yes	No
ENSG00000142173	protein_coding	collagen type VI alpha 2 chain	COL6A2	-0.724819	3.99173	-3.37706	0.000953313	0.00608595	-0.952539	Yes	Yes	Yes	No
ENSG00000272216	lincRNA	LL22NC03-2H8.5	LL22NC03-2H8.5	-0.78313	-0.111432	-3.37354	0.000964632	0.00613516	-0.963171	Yes	Yes	Yes	No
ENSG00000177570	protein_coding	sterile alpha motif domain containing 12	SAMD12	-0.637272	1.26694	-3.37106	0.000972705	0.00615122	-0.970676	Yes	Yes	Yes	No
ENSG00000134193	protein_coding	regenerating family member 4	REG4	-0.908669	-0.878368	-3.37117	0.000972342	0.00615122	-0.970341	Yes	Yes	Yes	No
ENSG00000090920	protein_coding	Fc fragment of IgG binding protein	FCGBP	-0.777966	3.73733	-3.37094	0.000973076	0.00615122	-0.97102	Yes	Yes	Yes	No
ENSG00000115523	protein_coding	granulysin	GNLY	-0.639547	8.16228	-3.36959	0.000977511	0.00616983	-0.975115	Yes	Yes	Yes	No
ENSG00000211689	TR_C_gene	T cell receptor gamma constant 1	TRGC1	-0.678482	4.03942	-3.36191	0.00100295	0.00629128	-0.998245	Yes	Yes	Yes	No
ENSG00000159231	protein_coding	carbonyl reductase 3	CBR3	-0.626318	1.03036	-3.35277	0.00103402	0.00641095	-1.02571	Yes	Yes	Yes	No
ENSG00000108387	protein_coding	septin 4	SEPT4	0.597153	1.54398	3.33741	0.00108832	0.00665897	-1.07176	Yes	Yes	Yes	No
ENSG00000237940	lincRNA	long intergenic non-protein coding RNA 1238	LINC01238	-0.611191	0.847463	-3.33461	0.00109851	0.00671094	-1.08014	Yes	Yes	Yes	No
ENSG00000099365	protein_coding	syntaxin 1B	STX1B	-0.63909	-0.226289	-3.33183	0.00110868	0.00674872	-1.08843	Yes	Yes	Yes	No
ENSG00000152268	processed_transcript	Spondin 1, extracellular matrix protein	SPON1	-0.661986	0.785947	-3.32895	0.00111935	0.00679733	-1.09704	Yes	Yes	Yes	No
ENSG00000205846	protein_coding	C-type lectin domain containing 6A	CLEC6A	0.6609	0.353158	3.32003	0.00115297	0.00694612	-1.12365	Yes	Yes	Yes	No
ENSG00000125730	protein_coding	complement C3	C3	0.614159	2.18134	3.31966	0.00115435	0.00694893	-1.12472	Yes	Yes	Yes	No
ENSG00000136315	lincRNA	novel transcript	AL355922.1	0.603802	0.695175	3.31196	0.00118418	0.00704495	-1.14766	Yes	Yes	Yes	No
ENSG00000182809	protein_coding	cysteine rich protein 2	CRIP2	-0.784358	2.44979	-3.30609	0.00120737	0.00712691	-1.16508	Yes	Yes	Yes	No
ENSG00000160321	protein_coding	zinc finger protein 208	ZNF208	-0.976695	-0.328343	-3.30265	0.00122115	0.00717513	-1.17527	Yes	Yes	Yes	No
ENSG00000173372	protein_coding	complement C1q A chain	C1QA	0.783319	2.12339	3.30087	0.00122835	0.00720633	-1.18055	Yes	Yes	Yes	No
ENSG00000263394	lincRNA	novel transcript	AC007952.7	-1.00758	-0.753517	-3.29775	0.00124108	0.00724367	-1.18981	Yes	Yes	Yes	No
ENSG00000213860	processed_pseudogene	ribosomal protein L21 pseudogene 75	RPL21P75	-0.939537	3.18664	-3.29582	0.00124899	0.00727695	-1.19552	Yes	Yes	Yes	No
ENSG00000272927	antisense	novel transcript, antisense to PDE6B	AC107464.3	-0.628776	-0.478881	-3.29398	0.0012566	0.0073045	-1.20097	Yes	Yes	Yes	No
ENSG00000182489	protein_coding	XK related X-linked	XKRX	-0.887571	-0.360397	-3.29343	0.00125885	0.00730642	-1.20258	Yes	Yes	Yes	No
ENSG00000008311	protein_coding	aminoadipate-semialdehyde synthase	AASS	-0.684086	0.529496	-3.29206	0.00126454	0.00733665	-1.20663	Yes	Yes	Yes	No
ENSG00000166839	protein_coding	ankyrin repeat and death domain containing 1A	ANKDD1A	0.675412	1.87313	3.28709	0.00128541	0.00743225	-1.22133	Yes	Yes	Yes	No
ENSG00000271741	protein_coding	novel transcript, ZMYM6-ZMYM6NB readthrough	AC114490.2	-0.789994	3.28702	-3.28605	0.00128981	0.00744478	-1.2244	Yes	Yes	Yes	No
ENSG00000184979	protein_coding	ubiquitin specific peptidase 18	USP18	0.921617	2.60244	3.28619	0.00128924	0.00744478	-1.224	Yes	Yes	Yes	No
ENSG00000227403	lincRNA	long intergenic non-protein coding RNA 1806	LINC01806	-0.592828	0.284712	-3.28459	0.00129602	0.00746523	-1.22871	Yes	Yes	Yes	No
ENSG00000196542	protein_coding	serine palmitoyltransferase small subunit B	SPTSSB	-0.796866	0.580119	-3.28184	0.00130778	0.00750225	-1.23682	Yes	Yes	Yes	No
ENSG00000251230	lincRNA	MIR3945 host gene	MIR3945HG	0.721796	0.598898	3.28104	0.00131121	0.00751322	-1.23917	Yes	Yes	Yes	No
ENSG00000099953	protein_coding	matrix metallopeptidase 11	MMP11	-0.600437	0.117566	-3.28076	0.00131244	0.00751597	-1.24001	Yes	Yes	Yes	No
ENSG00000157985	protein_coding	ArfGAP with GTPase domain, ankyrin repeat and PH domain 1	AGAP1	-0.620401	2.59828	-3.27944	0.00131812	0.00753834	-1.24388	Yes	Yes	Yes	No
ENSG00000102038	protein_coding	SWI/SNF related, matrix associated, actin dependent regulator of chromatin, subfamily a, member 1	SMARCA1	-0.752424	-0.960906	-3.27218	0.0013499	0.00767709	-1.26526	Yes	Yes	Yes	No
ENSG00000169085	protein_coding	vexin	C8orf46	-0.728583	-0.702803	-3.2651	0.00138157	0.00781318	-1.28607	Yes	Yes	Yes	No
ENSG00000170074	protein_coding	family with sequence similarity 153 member A	FAM153A	-0.722106	2.88606	-3.25707	0.00141838	0.0079563	-1.30965	Yes	Yes	Yes	No
ENSG00000181585	protein_coding	transmembrane inner ear	TMIE	-0.652517	-0.461978	-3.25646	0.00142119	0.00796325	-1.31143	Yes	Yes	Yes	No
ENSG00000162373	protein_coding	BEN domain containing 5	BEND5	-0.607093	0.595806	-3.25498	0.00142806	0.00799282	-1.31575	Yes	Yes	Yes	No
ENSG00000167483	protein_coding	family with sequence similarity 129 member C	FAM129C	-0.634883	4.57487	-3.2455	0.00147293	0.00816527	-1.34349	Yes	Yes	Yes	No
ENSG00000160932	protein_coding	lymphocyte antigen 6 family member E	LY6E	0.787164	6.95221	3.2446	0.00147727	0.00818112	-1.34612	Yes	Yes	Yes	No
ENSG00000172650	protein_coding	ArfGAP with GTPase domain, ankyrin repeat and PH domain 5	AGAP5	-0.626024	2.20443	-3.24444	0.00147806	0.00818252	-1.3466	Yes	Yes	Yes	No
ENSG00000183542	protein_coding	killer cell lectin like receptor C4	KLRC4	-1.03155	0.589951	-3.2438	0.00148113	0.00819359	-1.34846	Yes	Yes	Yes	No
ENSG00000005513	protein_coding	SRY-box 8	SOX8	-0.658341	0.279256	-3.24016	0.00149878	0.00824626	-1.35908	Yes	Yes	Yes	No
ENSG00000151320	protein_coding	A-kinase anchoring protein 6	AKAP6	-0.747835	0.500112	-3.23869	0.00150597	0.00827387	-1.36337	Yes	Yes	Yes	No
ENSG00000138755	protein_coding	C-X-C motif chemokine ligand 9	CXCL9	0.798979	-0.366345	3.22301	0.00158468	0.00855806	-1.40901	Yes	Yes	Yes	No
ENSG00000167748	protein_coding	kallikrein 1	KLK1	-0.791972	-0.631029	-3.22023	0.00159899	0.00860992	-1.41706	Yes	Yes	Yes	No
ENSG00000178852	protein_coding	EF-hand calcium binding domain 13	EFCAB13	-0.610647	0.867196	-3.20765	0.00166545	0.00884061	-1.45351	Yes	Yes	Yes	No
ENSG00000129757	protein_coding	cyclin dependent kinase inhibitor 1C	CDKN1C	0.654936	3.27334	3.20368	0.00168695	0.00894224	-1.46499	Yes	Yes	Yes	No
ENSG00000102010	protein_coding	BMX non-receptor tyrosine kinase	BMX	0.647684	2.57342	3.1972	0.0017226	0.00907434	-1.4837	Yes	Yes	Yes	No
ENSG00000233846	processed_pseudogene	selenoprotein T pseudogene 1	SELENOTP1	0.592824	0.183073	3.19135	0.00175536	0.00919284	-1.50055	Yes	Yes	Yes	No
ENSG00000211800	TR_V_gene	T cell receptor alpha variable 20	TRAV20	-0.645902	1.02917	-3.18875	0.00177011	0.00922647	-1.50804	Yes	Yes	Yes	No
ENSG00000174807	protein_coding	CD248 molecule	CD248	-0.69817	1.28726	-3.18647	0.00178316	0.00926549	-1.5146	Yes	Yes	Yes	No
ENSG00000152990	protein_coding	adhesion G protein-coupled receptor A3	ADGRA3	-0.628029	0.704891	-3.18283	0.00180413	0.00933587	-1.52506	Yes	Yes	Yes	No
ENSG00000110723	protein_coding	exophilin 5	EXPH5	-0.596112	0.553376	-3.18074	0.00181629	0.00936376	-1.53106	Yes	Yes	Yes	No
ENSG00000164904	protein_coding	aldehyde dehydrogenase 7 family member A1	ALDH7A1	-0.639048	-0.345575	-3.17792	0.00183285	0.00941089	-1.53918	Yes	Yes	Yes	No
ENSG00000188001	protein_coding	tumor protein p63 regulated 1	TPRG1	-0.639478	1.90062	-3.17557	0.00184671	0.00946928	-1.54591	Yes	Yes	Yes	No
ENSG00000254852	protein_coding	nuclear pore complex interacting protein family member A2	NPIPA2	-1.70529	-0.359933	-3.17568	0.00184603	0.00946928	-1.54558	Yes	Yes	Yes	No
ENSG00000273096	sense_intronic	novel transcript, sense intronic to SUN2	AL021707.8	-0.734994	-0.90903	-3.1739	0.0018566	0.00949364	-1.55068	Yes	Yes	Yes	No
ENSG00000225630	unprocessed_pseudogene	MT-ND2 pseudogene 28	MTND2P28	-1.76261	0.862702	-3.1729	0.00186256	0.00951529	-1.55355	Yes	Yes	Yes	No
ENSG00000197506	protein_coding	solute carrier family 28 member 3	SLC28A3	0.681203	-0.394469	3.17056	0.00187662	0.00955434	-1.56027	Yes	Yes	Yes	No
ENSG00000128739	protein_coding	small nuclear ribonucleoprotein polypeptide N	SNRPN	-0.653065	3.51151	-3.1655	0.00190727	0.0096434	-1.57474	Yes	Yes	Yes	No
ENSG00000227939	processed_pseudogene	ribosomal protein L3 pseudogene 2	RPL3P2	-0.612067	-0.0294406	-3.16415	0.00191555	0.00967242	-1.57861	Yes	Yes	Yes	No
ENSG00000134545	protein_coding	killer cell lectin like receptor C1	KLRC1	-0.66778	2.60041	-3.14972	0.00200591	0.0100625	-1.61978	Yes	Yes	Yes	No
ENSG00000004799	protein_coding	pyruvate dehydrogenase kinase 4	PDK4	0.679	4.78254	3.14405	0.0020425	0.0101651	-1.63592	Yes	Yes	Yes	No
ENSG00000150076	protein_coding	Homo sapiens coiled-coil domain containing 7 (CCDC7), transcript variant 5, mRNA	CCDC7	-0.725767	-0.967138	-3.14288	0.00205009	0.0101929	-1.63923	Yes	Yes	Yes	No
ENSG00000174912	processed_pseudogene	methyltransferase like 15 pseudogene 1	METTL15P1	-0.901797	-1.14079	-3.13522	0.00210066	0.01039	-1.66097	Yes	Yes	Yes	No
ENSG00000105048	protein_coding	troponin T1, slow skeletal type	TNNT1	0.816895	1.25481	3.13532	0.00210002	0.01039	-1.6607	Yes	Yes	Yes	No
ENSG00000172232	protein_coding	azurocidin 1	AZU1	0.846908	0.981443	3.13502	0.00210203	0.0103934	-1.66155	Yes	Yes	Yes	No
ENSG00000135919	protein_coding	serpin family E member 2	SERPINE2	-0.613446	1.11438	-3.13341	0.00211276	0.0104363	-1.6661	Yes	Yes	Yes	No
ENSG00000177455	protein_coding	CD19 molecule	CD19	-0.626987	3.92873	-3.12817	0.00214826	0.0105292	-1.68096	Yes	Yes	Yes	No
ENSG00000259658	transcribed_unprocessed_pseudogene	putative ubiquitin-conjugating enzyme E2Q2-like protein	AC027559.1	-0.751882	-0.436863	-3.12374	0.00217863	0.0106191	-1.69348	Yes	Yes	Yes	No
ENSG00000211750	TR_V_gene	T cell receptor beta variable 24-1	TRBV24-1	-0.655382	0.81258	-3.09534	0.00238319	0.0113451	-1.77347	Yes	Yes	Yes	No
ENSG00000255641	protein_coding	novel protein	AC068775.1	-1.03412	1.69779	-3.09497	0.00238594	0.0113547	-1.77449	Yes	Yes	Yes	No
ENSG00000227184	protein_coding	epiplakin 1	EPPK1	-0.754511	0.921145	-3.09178	0.00241004	0.0114336	-1.78345	Yes	Yes	Yes	No
ENSG00000131831	protein_coding	retinoic acid induced 2	RAI2	-0.733426	-0.90526	-3.08941	0.00242807	0.0115012	-1.79008	Yes	Yes	Yes	No
ENSG00000253368	protein_coding	TMF1-regulated nuclear protein 1	TRNP1	0.707745	-0.674399	3.0846	0.00246505	0.011633	-1.80354	Yes	Yes	Yes	No
ENSG00000123689	protein_coding	G0/G1 switch 2	G0S2	0.713281	-0.159241	3.07864	0.00251158	0.0118086	-1.82019	Yes	Yes	Yes	No
ENSG00000000003	protein_coding	tetraspanin 6	TSPAN6	-0.817305	-0.970571	-3.07491	0.00254117	0.0119257	-1.83061	Yes	Yes	Yes	No
ENSG00000227678	antisense	novel transcript, antisense to L3MBTL3	AL355581.1	-0.618311	-0.226307	-3.07142	0.00256912	0.0120161	-1.84035	Yes	Yes	Yes	No
ENSG00000229417	processed_pseudogene	nucleophosmin 1 pseudogene 25	NPM1P25	-0.74267	-0.228628	-3.06413	0.00262835	0.012233	-1.86062	Yes	Yes	Yes	No
ENSG00000111077	protein_coding	tensin 2	TNS2	-0.645935	-0.904829	-3.05601	0.00269585	0.0124331	-1.88317	Yes	Yes	Yes	No
ENSG00000204860	antisense	family with sequence similarity 201 member A	FAM201A	-0.674492	-0.8933	-3.05303	0.00272104	0.0125001	-1.89144	Yes	Yes	Yes	No
ENSG00000019169	protein_coding	macrophage receptor with collagenous structure	MARCO	0.625139	3.3343	3.04654	0.00277659	0.0126894	-1.9094	Yes	Yes	Yes	No
ENSG00000204677	protein_coding	family with sequence similarity 153 member C	FAM153C	-0.958006	-0.253041	-3.04385	0.00279998	0.0127664	-1.91686	Yes	Yes	Yes	No
ENSG00000234277	lincRNA	long intergenic non-protein coding RNA 1641	LINC01641	-0.82887	0.293317	-3.04281	0.002809	0.0127953	-1.91971	Yes	Yes	Yes	No
ENSG00000123358	protein_coding	nuclear receptor subfamily 4 group A member 1	NR4A1	0.614241	2.83797	3.04274	0.00280969	0.0127953	-1.91993	Yes	Yes	Yes	No
ENSG00000257800	processed_pseudogene	formin binding protein 1 pseudogene 1	FNBP1P1	-0.695066	-0.916378	-3.03636	0.00286595	0.0129937	-1.93755	Yes	Yes	Yes	No
ENSG00000249684	antisense	novel transcript, antisense to PROP1	AC106795.2	-0.591512	-0.354117	-3.03418	0.00288537	0.0130618	-1.94354	Yes	Yes	Yes	No
ENSG00000203778	protein_coding	family with sequence similarity 229 member B	FAM229B	-0.778004	-1.14038	-3.02566	0.00296265	0.0133245	-1.96702	Yes	Yes	Yes	No
ENSG00000231682	lincRNA	long intergenic non-protein coding RNA 1891	LINC01891	-0.849852	-1.1238	-3.02284	0.00298865	0.0134097	-1.97477	Yes	Yes	Yes	No
ENSG00000162366	protein_coding	PDZK1 interacting protein 1	PDZK1IP1	-0.618694	4.31058	-3.01929	0.00302165	0.0135251	-1.98452	Yes	Yes	Yes	No
ENSG00000233806	processed_transcript	long intergenic non-protein coding RNA 1237	LINC01237	-0.655683	-0.601825	-3.01173	0.00309307	0.0137578	-2.00525	Yes	Yes	Yes	No
ENSG00000169629	protein_coding	RANBP2-like and GRIP domain containing 8	RGPD8	-0.818515	2.80944	-3.00737	0.00313488	0.0138979	-2.01716	Yes	Yes	Yes	No
ENSG00000171680	protein_coding	pleckstrin homology and RhoGEF domain containing G5	PLEKHG5	-0.709188	0.777587	-2.99953	0.00321153	0.014184	-2.03859	Yes	Yes	Yes	No
ENSG00000226338	processed_pseudogene	pseudogene similar to part of phospholipase C, gamma 1 PLCG1	AC079150.2	-0.616647	-0.127379	-2.99923	0.00321456	0.01419	-2.03942	Yes	Yes	Yes	No
ENSG00000172460	transcribed_unitary_pseudogene	serine protease 30, pseudogene	PRSS30P	-0.618573	1.00375	-2.99066	0.00330041	0.0144501	-2.06279	Yes	Yes	Yes	No
ENSG00000225756	antisense	DBH antisense RNA 1	DBH-AS1	-0.708327	0.171853	-2.9789	0.00342154	0.0148066	-2.09473	Yes	Yes	Yes	No
ENSG00000259328	Known pseudogene	RP11-152F13.7	RP11-152F13.7	-1.17762	-1.44653	-2.9731	0.00348282	0.015029	-2.11045	Yes	Yes	Yes	No
ENSG00000101230	protein_coding	isthmin 1	ISM1	-0.596497	1.13858	-2.97255	0.00348874	0.0150448	-2.11196	Yes	Yes	Yes	No
ENSG00000173578	protein_coding	X-C motif chemokine receptor 1	XCR1	-0.738911	-0.142297	-2.96957	0.00352067	0.0151494	-2.12003	Yes	Yes	Yes	No
ENSG00000233175	antisense	novel transcript, antisense to FMNL1	AC008105.1	-0.604446	-0.181719	-2.96567	0.00356288	0.0152832	-2.13058	Yes	Yes	Yes	No
ENSG00000143248	protein_coding	regulator of G protein signaling 5	RGS5	-0.665448	-0.744327	-2.96095	0.00361446	0.0154352	-2.1433	Yes	Yes	Yes	No
ENSG00000158747	protein_coding	NBL1, DAN family BMP antagonist	NBL1	-0.776184	0.95611	-2.95523	0.00367809	0.0156499	-2.15874	Yes	Yes	Yes	No
ENSG00000070526	protein_coding	ST6 N-acetylgalactosaminide alpha-2,6-sialyltransferase 1	ST6GALNAC1	-0.740809	1.25326	-2.95131	0.00372221	0.0158023	-2.16929	Yes	Yes	Yes	No
ENSG00000259660	transcribed_unprocessed_pseudogene	dynamin 1 pseudogene 47	DNM1P47	-0.712671	-0.349961	-2.94746	0.00376607	0.015944	-2.17965	Yes	Yes	Yes	No
ENSG00000121236	protein_coding	tripartite motif containing 6	TRIM6	0.895441	0.044882	2.93995	0.00385286	0.0162347	-2.1998	Yes	Yes	Yes	No
ENSG00000211749	TR_V_gene	T cell receptor beta variable 23-1 (non-functional)	TRBV23-1	-0.725056	-0.563385	-2.93674	0.00389061	0.0163416	-2.20842	Yes	Yes	Yes	No
ENSG00000205746	transcribed_unprocessed_pseudogene	polycystic kidney disease 1 (autosomal dominant) (PKD1) pseudogene	AC126755.1	-0.672778	3.08385	-2.92961	0.00397547	0.0165906	-2.22749	Yes	Yes	Yes	No
ENSG00000260943	lincRNA	long intergenic non-protein coding RNA 2555	LINC02555	0.64124	1.4775	2.91256	0.00418552	0.0172637	-2.27297	Yes	Yes	Yes	No
ENSG00000108852	protein_coding	membrane palmitoylated protein 2	MPP2	-0.664131	-0.438518	-2.90816	0.00424134	0.0174373	-2.28466	Yes	Yes	Yes	No
ENSG00000097096	protein_coding	synapse defective Rho GTPase homolog 2	SYDE2	-0.717329	-0.358852	-2.9066	0.00426125	0.0174917	-2.2888	Yes	Yes	Yes	No
ENSG00000256667	transcribed_unprocessed_pseudogene	killer cell lectin like receptor A1, pseudogene	KLRA1P	-0.706294	1.08155	-2.90124	0.00433056	0.0177156	-2.30304	Yes	Yes	Yes	No
ENSG00000157734	protein_coding	sorting nexin 22	SNX22	-0.59141	3.1136	-2.90089	0.0043351	0.017727	-2.30396	Yes	Yes	Yes	No
ENSG00000183054	protein_coding	RANBP2-like and GRIP domain containing 6	RGPD6	-0.705518	4.51	-2.89145	0.00445962	0.0181067	-2.32894	Yes	Yes	Yes	No
ENSG00000106341	protein_coding	protein phosphatase 1 regulatory subunit 17	PPP1R17	0.987049	-0.316384	2.88949	0.0044859	0.0181921	-2.33412	Yes	Yes	Yes	No
ENSG00000157856	protein_coding	dynein regulatory complex subunit 1	DRC1	0.674287	-0.961971	2.88681	0.00452208	0.0183096	-2.3412	Yes	Yes	Yes	No
ENSG00000198892	protein_coding	shisa family member 4	SHISA4	-0.596627	1.85843	-2.87897	0.00462923	0.0186344	-2.36185	Yes	Yes	Yes	No
ENSG00000203797	protein_coding	D-aspartate oxidase	DDO	0.586661	-0.0432082	2.87743	0.00465068	0.0186911	-2.36592	Yes	Yes	Yes	No
ENSG00000215417	processed_transcript	miR-17-92a-1 cluster host gene	MIR17HG	-0.587397	-0.610456	-2.8628	0.00485788	0.0193502	-2.40432	Yes	Yes	Yes	No
ENSG00000272962	protein_coding	sodium/myo-inositol cotransporter	SLC5A3	-0.641458	3.153	-2.86078	0.00488721	0.0194263	-2.40962	Yes	Yes	Yes	No
ENSG00000156395	protein_coding	sortilin related VPS10 domain containing receptor 3	SORCS3	-0.872828	0.0501143	-2.85172	0.00502052	0.0198217	-2.43331	Yes	Yes	Yes	No
ENSG00000078081	protein_coding	lysosomal associated membrane protein 3	LAMP3	0.715955	1.90755	2.85128	0.00502707	0.0198372	-2.43445	Yes	Yes	Yes	No
ENSG00000166803	protein_coding	PCNA clamp associated factor	PCLAF	0.75054	-0.0397467	2.85021	0.00504311	0.0198697	-2.43726	Yes	Yes	Yes	No
ENSG00000270018	lincRNA	RP3-462E2.5	RP3-462E2.5	-0.650658	-1.18463	-2.83181	0.00532516	0.0207292	-2.48512	Yes	Yes	Yes	No
ENSG00000197353	protein_coding	LY6/PLAUR domain containing 2	LYPD2	0.995621	0.013201	2.82782	0.00538831	0.0208998	-2.49548	Yes	Yes	Yes	No
ENSG00000122026	protein_coding	ribosomal protein L21	RPL21	-0.710977	7.00432	-2.82295	0.00546615	0.0211263	-2.50808	Yes	Yes	Yes	No
ENSG00000100320	protein_coding	RNA binding fox-1 homolog 2	RBFOX2	-0.620702	-0.563072	-2.81968	0.00551908	0.0212769	-2.51655	Yes	Yes	Yes	No
ENSG00000225138	processed_transcript	SLC9A3 antisense RNA 1	SLC9A3-AS1	-0.611081	1.56251	-2.81797	0.00554683	0.0213623	-2.52096	Yes	Yes	Yes	No
ENSG00000188626	protein_coding	golgin A8 family member M	GOLGA8M	-0.798484	-0.738039	-2.81583	0.00558186	0.0214375	-2.52649	Yes	Yes	Yes	No
ENSG00000183298	processed_pseudogene	ribosomal protein SA pseudogene 19	RPSAP19	-0.849773	-1.29999	-2.81295	0.0056293	0.0215617	-2.53392	Yes	Yes	Yes	No
ENSG00000188611	protein_coding	N-acylsphingosine amidohydrolase 2	ASAH2	-0.701414	-0.558277	-2.80947	0.00568725	0.0216859	-2.54291	Yes	Yes	Yes	No
ENSG00000163687	protein_coding	deoxyribonuclease 1 like 3	DNASE1L3	-0.647312	0.32248	-2.80775	0.00571591	0.0217547	-2.54732	Yes	Yes	Yes	No
ENSG00000174705	protein_coding	SH3 and PX domains 2B	SH3PXD2B	0.647095	1.08771	2.80276	0.00580021	0.0220096	-2.56017	Yes	Yes	Yes	No
ENSG00000057019	protein_coding	discoidin, CUB and LCCL domain containing 2	DCBLD2	-0.588975	-0.385533	-2.79337	0.00596176	0.0224281	-2.58428	Yes	Yes	Yes	No
ENSG00000204936	protein_coding	CD177 molecule	CD177	1.3924	1.83144	2.79283	0.00597119	0.0224569	-2.58566	Yes	Yes	Yes	No
ENSG00000185168	lincRNA	long intergenic non-protein coding RNA 482	LINC00482	0.610953	0.140794	2.78361	0.00613403	0.0229559	-2.60925	Yes	Yes	Yes	No
ENSG00000214401	antisense	KANSL1 antisense RNA 1	KANSL1-AS1	-0.599217	1.52611	-2.78257	0.00615265	0.0229916	-2.61191	Yes	Yes	Yes	No
ENSG00000198035	protein_coding	ArfGAP with GTPase domain, ankyrin repeat and PH domain 9	AGAP9	-1.15328	1.07939	-2.77844	0.00622717	0.0232131	-2.62246	Yes	Yes	Yes	No
ENSG00000186185	protein_coding	kinesin family member 18B	KIF18B	0.654033	-0.567285	2.7751	0.00628803	0.0233599	-2.63099	Yes	Yes	Yes	No
ENSG00000188157	protein_coding	agrin	AGRN	0.719758	2.12158	2.77173	0.00634982	0.0235304	-2.63955	Yes	Yes	Yes	No
ENSG00000164283	protein_coding	endothelial cell specific molecule 1	ESM1	-0.791421	-0.871227	-2.76719	0.00643417	0.0237338	-2.65111	Yes	Yes	Yes	No
ENSG00000230903	processed_pseudogene	Ribosomal protein L9 pseudogene 8	RPL9P8	-0.696386	7.3569	-2.76105	0.00654976	0.0240389	-2.6667	Yes	Yes	Yes	No
ENSG00000237550	transcribed_processed_pseudogene	ribosomal protein L9 pseudogene 9	RPL9P9	-0.696386	7.3569	-2.76105	0.00654976	0.0240389	-2.6667	Yes	Yes	Yes	No
ENSG00000241134	processed_pseudogene	Bet1 golgi vesicular membrane trafficking protein pseudogene 1	BET1P1	-1.15021	-0.945698	-2.75809	0.00660617	0.0241702	-2.67421	Yes	Yes	Yes	No
ENSG00000091972	protein_coding	CD200 molecule	CD200	-0.642001	2.34763	-2.75709	0.0066253	0.0242286	-2.67674	Yes	Yes	Yes	No
ENSG00000260306	lincRNA	novel transcript	AC092375.2	-0.73475	0.835546	-2.75523	0.006661	0.0243299	-2.68144	Yes	Yes	Yes	No
ENSG00000260286	protein_coding	armadillo-like helical domain containing 2	C6orf229	-0.971957	-1.39621	-2.75208	0.00672212	0.0244944	-2.68944	Yes	Yes	Yes	No
ENSG00000231752	transcribed_unprocessed_pseudogene	embigin pseudogene 1	EMBP1	-0.784439	-0.326967	-2.74754	0.00681088	0.0247467	-2.70091	Yes	Yes	Yes	No
ENSG00000116983	protein_coding	hippocalcin like 4	HPCAL4	-0.623653	2.68226	-2.7436	0.00688877	0.0250059	-2.71086	Yes	Yes	Yes	No
ENSG00000254415	protein_coding	sialic acid binding Ig like lectin 14	SIGLEC14	1.42479	6.14847	2.74183	0.00692394	0.0250797	-2.71531	Yes	Yes	Yes	No
ENSG00000106565	protein_coding	transmembrane protein 176B	TMEM176B	1.38035	5.03789	2.74168	0.00692703	0.0250849	-2.7157	Yes	Yes	Yes	No
ENSG00000260828	processed_pseudogene	high mobility group box 3 pseudogene 32	HMGB3P32	-0.70052	-0.958973	-2.73561	0.00704914	0.0254304	-2.73098	Yes	Yes	Yes	No
ENSG00000246090	antisense	novel transcript, antisense to ADH4, ADH6 & ADH1A	AP002026.1	-0.618637	-0.647021	-2.73083	0.00714672	0.0256789	-2.743	Yes	Yes	Yes	No
ENSG00000272917	processed_transcript	novel transcript	AC010186.4	-1.18066	-0.321566	-2.7257	0.00725288	0.0259205	-2.75588	Yes	Yes	Yes	No
ENSG00000197358	transcribed_processed_pseudogene	BCL2 interacting protein 3 pseudogene 1	BNIP3P1	-0.638416	-0.71179	-2.72551	0.00725692	0.025928	-2.75637	Yes	Yes	Yes	No
ENSG00000213204	protein_coding	novel transcript, C6orf165-SLC35A1 readthrough	AL049697.1	-0.836048	-0.428436	-2.72351	0.00729862	0.0260465	-2.76137	Yes	Yes	Yes	No
ENSG00000198155	transcribed_unprocessed_pseudogene	zinc finger protein 876, pseudogene	ZNF876P	-0.621201	-1.20973	-2.71227	0.00753759	0.0267098	-2.7895	Yes	Yes	Yes	No
ENSG00000240563	protein_coding	LINE1 type transposase domain containing 1	L1TD1	0.712058	-0.553006	2.70631	0.00766704	0.0270756	-2.80436	Yes	Yes	Yes	No
ENSG00000089685	protein_coding	baculoviral IAP repeat containing 5	BIRC5	0.593874	0.323852	2.70562	0.00768203	0.027116	-2.80607	Yes	Yes	Yes	No
ENSG00000211751	TR_C_gene	T cell receptor beta constant 1	TRBC1	-0.595028	0.250166	-2.70528	0.00768957	0.0271297	-2.80692	Yes	Yes	Yes	No
ENSG00000198208	protein_coding	ribosomal protein S6 kinase like 1	RPS6KL1	-0.588061	-0.342873	-2.69531	0.00791129	0.0277004	-2.83172	Yes	Yes	Yes	No
ENSG00000211725	TR_V_gene	T cell receptor beta variable 5-5	TRBV5-5	-0.620141	-0.0257296	-2.68228	0.00820993	0.0285229	-2.86401	Yes	Yes	Yes	No
ENSG00000181634	protein_coding	TNF superfamily member 15	TNFSF15	0.60269	0.135077	2.66644	0.00858665	0.0295219	-2.90308	Yes	Yes	Yes	No
ENSG00000169607	protein_coding	cytoskeleton associated protein 2 like	CKAP2L	0.656525	-0.577719	2.66176	0.0087007	0.0297997	-2.91456	Yes	Yes	Yes	No
ENSG00000162620	protein_coding	leucine rich repeats and IQ motif containing 3	LRRIQ3	-0.650273	-0.9343	-2.65545	0.0088569	0.0301683	-2.93004	Yes	Yes	Yes	No
ENSG00000100336	protein_coding	apolipoprotein L4	APOL4	0.642724	0.0251613	2.64737	0.00906076	0.0306604	-2.94982	Yes	Yes	Yes	No
ENSG00000196951	antisense	SCOC antisense RNA 1	SCOC-AS1	-0.597604	-0.880128	-2.64423	0.00914105	0.0308498	-2.95749	Yes	Yes	Yes	No
ENSG00000175746	lincRNA	chromosome 15 open reading frame 54 (putative)	C15orf54	-0.717228	0.207307	-2.64365	0.0091559	0.0308862	-2.9589	Yes	Yes	Yes	No
ENSG00000273432	processed_transcript	novel transcript, POLR2J4 pseudogene-RASA4 pseudogene readthrough	AC004951.4	-0.732453	-1.15612	-2.6323	0.00945183	0.0315905	-2.98654	Yes	Yes	Yes	No
ENSG00000234287	processed_pseudogene	ribosomal protein S27 (RPS27) pseudogene	AC099560.2	-0.832197	6.87453	-2.59596	0.0104588	0.034183	-3.07434	Yes	Yes	Yes	No
ENSG00000256745	processed_pseudogene	actin related protein 2/3 complex, subunit 3, 21kDa (ARPC3) pseudogene	AP002784.2	0.685828	0.519277	2.59477	0.0104933	0.0342663	-3.07719	Yes	Yes	Yes	No
ENSG00000233396	lincRNA	long intergenic non-protein coding RNA 1719	LINC01719	-0.704426	-0.486672	-2.58211	0.0108672	0.035163	-3.1075	Yes	Yes	Yes	No
ENSG00000130433	protein_coding	calcium voltage-gated channel auxiliary subunit gamma 6	CACNG6	-0.716451	0.461903	-2.5738	0.0111189	0.0357345	-3.12732	Yes	Yes	Yes	No
ENSG00000198750	protein_coding	GATS protein-like 2	GATSL2	-0.977396	-0.0413083	-2.57233	0.011164	0.0358471	-3.13082	Yes	Yes	Yes	No
ENSG00000197646	protein_coding	programmed cell death 1 ligand 2	PDCD1LG2	0.591853	-0.0479648	2.56449	0.0114075	0.0363853	-3.14947	Yes	Yes	Yes	No
ENSG00000253861	processed_pseudogene	solute carrier family 2 member 3 pseudogene 1	SLC2A3P1	1.04825	-0.453692	2.55813	0.0116082	0.0368173	-3.16454	Yes	Yes	Yes	No
ENSG00000221874	protein_coding	ZNF816-ZNF321P readthrough	ZNF816-ZNF321P	-1.02895	-1.54827	-2.55748	0.011629	0.0368678	-3.16609	Yes	Yes	Yes	No
ENSG00000177990	protein_coding	dpy-19 like 2	DPY19L2	-0.690888	-1.09052	-2.55133	0.0118264	0.037346	-3.18063	Yes	Yes	Yes	No
ENSG00000178458	processed_pseudogene	H3 histone, family 3A, pseudogene 6	H3F3AP6	0.973003	-0.545453	2.5461	0.0119969	0.0377358	-3.19299	Yes	Yes	Yes	No
ENSG00000198046	protein_coding	zinc finger protein 667	ZNF667	-0.62188	-0.162535	-2.54595	0.0120017	0.037743	-3.19333	Yes	Yes	Yes	No
ENSG00000255831	novel_pseudogene	AL139385.1	AL139385.1	-0.783725	0.874679	-2.54134	0.0121538	0.0381238	-3.2042	Yes	Yes	Yes	No
ENSG00000248015	antisense	novel transcript, antisense to NDUFS7	AC005329.1	-0.599328	-1.03464	-2.53618	0.012326	0.0385557	-3.21634	Yes	Yes	Yes	No
ENSG00000197520	protein_coding	family with sequence similarity 177 member B	FAM177B	-0.746916	-0.159073	-2.53473	0.0123748	0.0386768	-3.21975	Yes	Yes	Yes	No
ENSG00000181524	processed_pseudogene	ribosomal protein L24 pseudogene 4	RPL24P4	-0.799309	-1.08987	-2.53256	0.0124482	0.0388264	-3.22485	Yes	Yes	Yes	No
ENSG00000125498	protein_coding	killer cell immunoglobulin like receptor, two Ig domains and long cytoplasmic tail 1	KIR2DL1	-0.878566	0.725793	-2.52311	0.0127723	0.0396019	-3.247	Yes	Yes	Yes	No
ENSG00000242550	protein_coding	serpin family B member 10	SERPINB10	0.762675	0.856497	2.52214	0.0128059	0.0396657	-3.24926	Yes	Yes	Yes	No
ENSG00000169439	protein_coding	syndecan 2	SDC2	-0.596423	0.845802	-2.5206	0.0128596	0.0397512	-3.25287	Yes	Yes	Yes	No
ENSG00000259472	Known pseudogene	RP13-996F3.3	RP13-996F3.3	-0.793637	-0.755603	-2.51272	0.0131371	0.0403721	-3.27126	Yes	Yes	Yes	No
ENSG00000186523	protein_coding	family with sequence similarity 86 member B1	FAM86B1	-0.935132	-1.29612	-2.50665	0.0133546	0.0408748	-3.2854	Yes	Yes	Yes	No
ENSG00000115155	protein_coding	otoferlin	OTOF	0.92764	0.364603	2.48842	0.0140269	0.042492	-3.32764	Yes	Yes	Yes	No
ENSG00000065328	protein_coding	minichromosome maintenance 10 replication initiation factor	MCM10	0.65651	-0.562391	2.48839	0.0140282	0.042492	-3.32772	Yes	Yes	Yes	No
ENSG00000128040	protein_coding	serine peptidase inhibitor, Kazal type 2	SPINK2	-0.598204	-1.14657	-2.47926	0.0143762	0.0432706	-3.34877	Yes	Yes	Yes	No
ENSG00000214389	processed_pseudogene	ribosomal protein S3a pseudogene 26	RPS3AP26	-1.29926	-0.753708	-2.46987	0.0147422	0.0441019	-3.37036	Yes	Yes	Yes	No
ENSG00000242299	processed_pseudogene	ribosomal protein S18 (RPS18) pseudogene	AC073861.1	-0.635127	-0.126319	-2.46655	0.0148734	0.0443636	-3.37796	Yes	Yes	Yes	No
ENSG00000159189	protein_coding	complement C1q C chain	C1QC	0.90336	-0.988102	2.45837	0.0152016	0.0451393	-3.39669	Yes	Yes	Yes	No
ENSG00000002587	protein_coding	heparan sulfate-glucosamine 3-sulfotransferase 1	HS3ST1	-0.696006	-0.220484	-2.44653	0.015688	0.0463397	-3.42368	Yes	Yes	Yes	No
ENSG00000172264	protein_coding	MACRO domain containing 2	MACROD2	-0.703643	1.37722	-2.43874	0.0160156	0.0470334	-3.44138	Yes	Yes	Yes	No
ENSG00000234631	protein_coding	Uncharacterized protein	AL162407.1	-0.603564	1.6521	-2.42324	0.0166854	0.0486346	-3.47644	Yes	Yes	Yes	No
ENSG00000107249	protein_coding	GLIS family zinc finger 3	GLIS3	-0.61896	-0.609814	-2.42146	0.0167639	0.0487886	-3.48045	Yes	Yes	Yes	No
ENSG00000129173	protein_coding	E2F transcription factor 8	E2F8	0.710108	-0.699566	2.42083	0.0167916	0.04886	-3.48186	Yes	Yes	Yes	No
ENSG00000261611	protein_coding	novel transcript	AC010547.4	-1.57051	-1.49578	-2.41431	0.0170823	0.0494035	-3.49653	Yes	Yes	Yes	No
