# Supplementary material
Source: HighWire-hosted journal article supplement (https://ard.bmj.com/content/79/9/1218)
Supplement: inline-supplementary-material-4 [file inline-supplementary-material-4.xlsx]

## Sheet: Reactome Discovery
GO Term	Pathway	Mean cases	SD cases	Mean controls	SD controls	FDR q	Effect size	Effect size (r)	Also in Validation
R-HSA-9617324	Negative regulation of NMDA receptor-mediated neuronal transmission	0.612746	0.0910387	0.742669	0.0591543	2.19659e-27	-1.1731	-0.50594	Yes
R-HSA-1442490	Collagen degradation	-0.85189	0.0457414	-0.911927	0.0276894	1.8931e-25	1.11381	0.486545	Yes
R-HSA-2022377	Metabolism of Angiotensinogen to Angiotensins	0.827757	0.0505309	0.745754	0.0475615	1.47769e-24	1.08445	0.476661	Yes
R-HSA-2682334	EPH-Ephrin signaling	0.820519	0.0323051	0.766207	0.0330844	7.50602e-24	1.06199	0.468978	Yes
R-HSA-622312	Inflammasomes	0.839316	0.0470451	0.749596	0.0581176	1.40514e-23	1.05177	0.465447	Yes
R-HSA-1566948	Elastic fibre formation	-0.808201	0.048253	-0.869289	0.0321854	8.34306e-23	1.02781	0.457082	Yes
R-HSA-2022928	HS-GAG biosynthesis	-0.798647	0.0732131	-0.877955	0.0346487	4.14163e-22	1.00781	0.45	Yes
R-HSA-3781865	Diseases of glycosylation	-0.843952	0.0525132	-0.905438	0.0312818	6.62949e-22	1.00046	0.447378	Yes
R-HSA-5633007	Regulation of TP53 Activity	0.532923	0.112194	0.662119	0.0646248	7.49098e-22	-0.997805	-0.446428	Yes
R-HSA-5609975	Diseases associated with glycosylation precursor biosynthesis	-0.822701	0.0536551	-0.885033	0.0319823	1.07024e-21	0.992364	0.444475	Yes
R-HSA-975576	N-glycan antennae elongation in the medial/trans-Golgi	0.738922	0.0560789	0.807447	0.0376065	1.22835e-21	-0.989492	-0.443442	Yes
R-HSA-1474244	Extracellular matrix organization	-0.684081	0.0609772	-0.760572	0.0440716	2.85272e-21	0.978342	0.439415	Yes
R-HSA-909733	Interferon alpha/beta signaling	0.757274	0.0804639	0.652044	0.0631768	3.38439e-21	0.975276	0.438302	Yes
R-HSA-196854	Metabolism of vitamins and cofactors	-0.657813	0.0634605	-0.735639	0.044905	6.40361e-21	0.966961	0.435276	Yes
R-HSA-71240	Tryptophan catabolism	-0.877838	0.0397393	-0.923782	0.0249977	7.42728e-21	0.964589	0.43441	Yes
R-HSA-844456	The NLRP3 inflammasome	0.85822	0.0503216	0.770606	0.0623325	1.03043e-20	0.958249	0.432089	Yes
R-HSA-6798695	Neutrophil degranulation	0.838465	0.0503804	0.752968	0.0606546	1.35754e-20	0.95431	0.430643	Yes
R-HSA-1474165	Reproduction	0.839173	0.0301293	0.883782	0.0300553	1.57859e-20	-0.952112	-0.429835	Yes
R-HSA-6806003	Regulation of TP53 Expression and Degradation	0.855309	0.0348507	0.899208	0.026789	1.7542e-20	-0.950513	-0.429246	Yes
R-HSA-73614	Pyrimidine salvage	-0.829481	0.0688347	-0.90563	0.0404714	1.7542e-20	0.950489	0.429237	Yes
R-HSA-1280215	Cytokine Signaling in Immune system	0.754334	0.0705541	0.651787	0.0690055	1.99702e-20	0.947097	0.427986	Yes
R-HSA-5362517	Signaling by Retinoic Acid	-0.774473	0.0643288	-0.852647	0.0464942	1.99702e-20	0.947768	0.428234	Yes
R-HSA-1474228	Degradation of the extracellular matrix	-0.374481	0.310789	-0.644248	0.063419	4.79796e-20	0.937788	0.424541	Yes
R-HSA-392517	Rap1 signalling	0.751917	0.0579279	0.825514	0.0474846	1.22012e-19	-0.924402	-0.419554	Yes
R-HSA-8943724	Regulation of PTEN gene transcription	0.688411	0.0799216	0.782993	0.0580022	1.57639e-19	-0.920997	-0.418279	Yes
R-HSA-3700989	Transcriptional Regulation by TP53	0.73828	0.0700617	0.826499	0.0574682	2.2887e-19	-0.91581	-0.416333	Yes
R-HSA-1638074	Keratan sulfate/keratin metabolism	-0.226007	0.411531	-0.574752	0.0837772	2.51676e-19	0.915733	0.416304	Yes
R-HSA-977068	Termination of O-glycan biosynthesis	-0.831247	0.0619751	-0.732455	0.0728782	2.73835e-19	-0.912291	-0.415009	Yes
R-HSA-373755	Semaphorin interactions	0.869183	0.0376673	0.812776	0.0411462	5.14904e-19	0.90423	0.411967	Yes
R-HSA-3928665	EPH-ephrin mediated repulsion of cells	0.782015	0.0537755	0.700472	0.0602397	7.4746e-19	0.899224	0.410071	Yes
R-HSA-2129379	Molecules associated with elastic fibres	-0.812822	0.0504519	-0.867956	0.0327151	7.75077e-19	0.899158	0.410045	Yes
R-HSA-933542	TRAF6 mediated NF-kB activation	0.856952	0.0380234	0.806665	0.0349328	8.17973e-19	0.897621	0.409462	Yes
R-HSA-6783310	Fanconi Anemia Pathway	-0.78578	0.0415863	-0.719294	0.050292	8.80469e-19	-0.896015	-0.408852	Yes
R-HSA-5602498	MyD88 deficiency (TLR2/4)	0.871412	0.044133	0.805047	0.0492314	9.78642e-19	0.894456	0.408259	Yes
R-HSA-389357	CD28 dependent PI3K/Akt signaling	0.504895	0.167567	0.659451	0.0695903	1.37373e-18	-0.89127	-0.407046	Yes
R-HSA-1592389	Activation of Matrix Metalloproteinases	-0.185214	0.436694	-0.547396	0.101163	2.08326e-18	0.885926	0.405007	Yes
R-HSA-6804758	Regulation of TP53 Activity through Acetylation	0.726269	0.0697372	0.811975	0.058222	2.08326e-18	-0.884634	-0.404513	Yes
R-HSA-75205	Dissolution of Fibrin Clot	-0.159812	0.426894	-0.511674	0.0929336	2.08326e-18	0.885647	0.4049	Yes
R-HSA-5576892	Phase 0 - rapid depolarisation	-0.847546	0.041077	-0.781713	0.0511867	3.20141e-18	-0.878047	-0.401989	Yes
R-HSA-6804757	Regulation of TP53 Degradation	0.871534	0.0389212	0.913538	0.0263131	6.11278e-18	-0.870487	-0.399081	Yes
R-HSA-438066	Unblocking of NMDA receptors, glutamate binding and activation	-0.744416	0.059582	-0.644448	0.0798894	6.57763e-18	-0.868413	-0.398282	Yes
R-HSA-917937	Iron uptake and transport	0.737547	0.041534	0.674876	0.049235	1.44282e-17	0.858424	0.394416	Yes
R-HSA-202670	ERKs are inactivated	0.844126	0.0480706	0.788188	0.0392268	3.12183e-17	0.848897	0.390711	Yes
R-HSA-168325	Viral Messenger RNA Synthesis	0.199075	0.415665	0.534587	0.110634	3.43e-17	-0.848693	-0.390631	Yes
R-HSA-159231	Transport of Mature mRNA Derived from an Intronless Transcript	0.0584167	0.430076	0.429292	0.17342	6.67341e-17	-0.839648	-0.387094	Yes
R-HSA-211945	Phase I - Functionalization of compounds	-0.749027	0.0706604	-0.819354	0.0437835	8.34778e-17	0.836012	0.385668	Yes
R-HSA-1236974	ER-Phagosome pathway	0.672483	0.0469259	0.603087	0.0562037	8.38874e-17	0.834848	0.385211	Yes
R-HSA-211000	Gene Silencing by RNA	0.753439	0.0600352	0.822628	0.0496753	9.14276e-17	-0.833943	-0.384855	Yes
R-HSA-5656121	Translesion synthesis by POLI	0.817146	0.0498044	0.873063	0.0394937	1.00007e-16	-0.832608	-0.38433	Yes
R-HSA-381426	Regulation of Insulin-like Growth Factor (IGF) transport and uptake by Insulin-like Growth Factor Binding Proteins (IGFBPs)	0.803495	0.0642492	0.726605	0.0568865	1.07368e-16	0.831312	0.38382	Yes
R-HSA-211859	Biological oxidations	-0.879232	0.0411821	-0.918923	0.0240101	1.13005e-16	0.830981	0.38369	Yes
R-HSA-71336	Pentose phosphate pathway	0.824611	0.0446623	0.756996	0.0558317	1.36085e-16	0.827417	0.382285	Yes
R-HSA-5686938	Regulation of TLR by endogenous ligand	0.859001	0.0496925	0.790766	0.0545707	1.50818e-16	0.826009	0.381729	Yes
R-HSA-159236	Transport of Mature mRNA derived from an Intron-Containing Transcript	0.775434	0.0645517	0.843659	0.0464745	1.55073e-16	-0.825958	-0.381709	Yes
R-HSA-114508	Effects of PIP2 hydrolysis	0.297034	0.390053	0.59757	0.0908396	2.16463e-16	-0.822597	-0.380381	Yes
R-HSA-975577	N-Glycan antennae elongation	0.836586	0.0464624	0.886926	0.0354417	2.18854e-16	-0.821028	-0.37976	Yes
R-HSA-5666185	RHO GTPases Activate Rhotekin and Rhophilins	0.772855	0.0539836	0.707887	0.0493703	2.43903e-16	0.819186	0.379031	Yes
R-HSA-4551638	SUMOylation of chromatin organization proteins	0.637375	0.0921135	0.727789	0.0580281	2.65134e-16	-0.818394	-0.378717	Yes
R-HSA-389356	CD28 co-stimulation	0.868564	0.0366221	0.907097	0.026839	3.43606e-16	-0.814652	-0.377232	Yes
R-HSA-8964539	Glutamate and glutamine metabolism	0.231185	0.417733	0.549442	0.096839	3.96083e-16	-0.813758	-0.376877	Yes
R-HSA-8957275	Post-translational protein phosphorylation	0.795784	0.0619572	0.721337	0.0573784	4.19097e-16	0.811381	0.375932	Yes
R-HSA-5655862	Translesion synthesis by POLK	0.819976	0.0529143	0.875165	0.0386876	5.26638e-16	-0.808543	-0.374802	Yes
R-HSA-203927	MicroRNA (miRNA) biogenesis	0.643428	0.0886783	0.729736	0.0567411	6.52432e-16	-0.805756	-0.373691	Yes
R-HSA-913531	Interferon Signaling	0.750435	0.0786403	0.665211	0.0621603	6.60154e-16	0.805128	0.37344	Yes
R-HSA-71387	Metabolism of carbohydrates	0.711548	0.0754075	0.621905	0.0696493	6.93257e-16	0.804105	0.373032	Yes
R-HSA-5607763	CLEC7A (Dectin-1) induces NFAT activation	0.818068	0.039732	0.866906	0.0387261	7.52568e-16	-0.802788	-0.372506	Yes
R-HSA-163125	Post-translational modification: synthesis of GPI-anchored proteins	-0.698728	0.0829346	-0.781421	0.056306	7.80664e-16	0.802587	0.372425	Yes
R-HSA-15869	Metabolism of nucleotides	-0.853606	0.0437873	-0.899071	0.0323295	8.78283e-16	0.800766	0.371697	Yes
R-HSA-5685942	HDR through Homologous Recombination (HRR)	-0.812644	0.0413833	-0.748676	0.0555899	9.48536e-16	-0.798905	-0.370952	Yes
R-HSA-72202	Transport of Mature Transcript to Cytoplasm	0.775354	0.0674642	0.843275	0.0473837	1.16432e-15	-0.796812	-0.370114	Yes
R-HSA-1500620	Meiosis	0.876029	0.0259002	0.908808	0.0267594	1.31147e-15	-0.794608	-0.36923	Yes
R-HSA-1236975	Antigen processing-Cross presentation	0.643766	0.0475555	0.57935	0.0543609	1.62379e-15	0.791546	0.368	Yes
R-HSA-977225	Amyloid fiber formation	0.823009	0.0775765	0.72317	0.0826645	1.69801e-15	0.790865	0.367726	Yes
R-HSA-73857	RNA Polymerase II Transcription	-0.847324	0.053728	-0.777532	0.0581977	1.92063e-15	-0.789071	-0.367004	Yes
R-HSA-917977	Transferrin endocytosis and recycling	0.738956	0.0492829	0.668259	0.0612877	2.17402e-15	0.787146	0.36623	Yes
R-HSA-168256	Immune System	0.829991	0.0643725	0.757313	0.0566453	2.18867e-15	0.787269	0.366279	Yes
R-HSA-72187	mRNA 3'-end processing	0.788752	0.0558493	0.844307	0.0393051	2.34591e-15	-0.786481	-0.365962	Yes
R-HSA-193692	Regulated proteolysis of p75NTR	0.835067	0.0527235	0.768988	0.0545883	2.35992e-15	0.785766	0.365673	Yes
R-HSA-110312	Translesion synthesis by REV1	0.81822	0.0503404	0.871633	0.0401567	2.66291e-15	-0.784213	-0.365047	Yes
R-HSA-3214858	RMTs methylate histone arginines	0.154904	0.432595	0.493616	0.153444	2.66291e-15	-0.785112	-0.36541	Yes
R-HSA-879415	Advanced glycosylation endproduct receptor signaling	0.913353	0.0274856	0.873523	0.0349303	2.97883e-15	0.782034	0.364167	Yes
R-HSA-936837	Ion transport by P-type ATPases	0.328957	0.322116	0.56678	0.0811257	3.4701e-15	-0.78156	-0.363976	Yes
R-HSA-74160	Gene expression (Transcription)	-0.845002	0.0561736	-0.771831	0.062172	3.60822e-15	-0.779195	-0.36302	Yes
R-HSA-5357769	Caspase activation via extrinsic apoptotic signalling pathway	0.804721	0.0681391	0.723581	0.0666179	4.44641e-15	0.77614	0.361783	Yes
R-HSA-77387	Insulin receptor recycling	0.744447	0.0477908	0.675792	0.0606577	4.44641e-15	0.776043	0.361744	Yes
R-HSA-77595	Processing of Intronless Pre-mRNAs	0.615008	0.110832	0.711959	0.0599584	4.44641e-15	-0.776889	-0.362087	Yes
R-HSA-5668914	Diseases of metabolism	-0.264178	0.424193	-0.575068	0.105662	4.61107e-15	0.776813	0.362056	Yes
R-HSA-9022692	Regulation of MECP2 expression and activity	0.794164	0.0438602	0.839216	0.0336992	4.69351e-15	-0.775286	-0.361437	Yes
R-HSA-140877	Formation of Fibrin Clot (Clotting Cascade)	-0.808109	0.0555604	-0.859452	0.0345261	4.75824e-15	0.775234	0.361416	Yes
R-HSA-5655253	Signaling by FGFR2 in disease	0.114081	0.495615	0.500007	0.181449	4.79458e-15	-0.775572	-0.361553	Yes
R-HSA-2990846	SUMOylation	0.732413	0.0523322	0.784725	0.0383065	4.86165e-15	-0.774463	-0.361103	Yes
R-HSA-3108232	SUMO E3 ligases SUMOylate target proteins	0.75368	0.0483943	0.801767	0.0351521	5.40601e-15	-0.772938	-0.360485	Yes
R-HSA-5685938	HDR through Single Strand Annealing (SSA)	-0.779788	0.0393879	-0.721624	0.0523453	6.51141e-15	-0.769682	-0.359162	Yes
R-HSA-5260271	Diseases of Immune System	0.862626	0.0433837	0.806828	0.0482164	7.88552e-15	0.767054	0.358094	Yes
R-HSA-5602358	Diseases associated with the TLR signaling cascade	0.862626	0.0433837	0.806828	0.0482164	7.88552e-15	0.767054	0.358094	Yes
R-HSA-6804115	TP53 regulates transcription of additional cell cycle genes whose exact role in the p53 pathway remain uncertain	0.828733	0.0537241	0.882053	0.0396329	8.93191e-15	-0.765752	-0.357564	Yes
R-HSA-936964	Activation of IRF3/IRF7 mediated by TBK1/IKK epsilon	0.84805	0.060416	0.774124	0.0628882	9.55943e-15	0.764314	0.356978	Yes
R-HSA-3108214	SUMOylation of DNA damage response and repair proteins	0.524273	0.102729	0.617931	0.063933	9.91797e-15	-0.764317	-0.356979	Yes
R-HSA-166058	MyD88:MAL(TIRAP) cascade initiated on plasma membrane	0.87742	0.0386553	0.827312	0.0438922	1.14407e-14	0.761205	0.35571	Yes
R-HSA-168179	Toll Like Receptor TLR1:TLR2 Cascade	0.87742	0.0386553	0.827312	0.0438922	1.14407e-14	0.761205	0.35571	Yes
R-HSA-168188	Toll Like Receptor TLR6:TLR2 Cascade	0.87742	0.0386553	0.827312	0.0438922	1.14407e-14	0.761205	0.35571	Yes
R-HSA-181438	Toll Like Receptor 2 (TLR2) Cascade	0.87742	0.0386553	0.827312	0.0438922	1.14407e-14	0.761205	0.35571	Yes
R-HSA-9005891	Loss of function of MECP2 in Rett syndrome	0.757165	0.0654568	0.820784	0.0471061	1.30802e-14	-0.759706	-0.355098	Yes
R-HSA-9005895	Pervasive developmental disorders	0.757165	0.0654568	0.820784	0.0471061	1.30802e-14	-0.759706	-0.355098	Yes
R-HSA-5693616	Presynaptic phase of homologous DNA pairing and strand exchange	-0.763557	0.0381186	-0.707692	0.0511983	1.45133e-14	-0.757525	-0.354206	Yes
R-HSA-168181	Toll Like Receptor 7/8 (TLR7/8) Cascade	0.873068	0.0403417	0.82373	0.0425566	1.52146e-14	0.756884	0.353944	Yes
R-HSA-975155	MyD88 dependent cascade initiated on endosome	0.873068	0.0403417	0.82373	0.0425566	1.52146e-14	0.756884	0.353944	Yes
R-HSA-176187	Activation of ATR in response to replication stress	-0.8555	0.0477517	-0.793083	0.0553455	1.58666e-14	-0.756111	-0.353628	Yes
R-HSA-3371556	Cellular response to heat stress	0.771966	0.0520823	0.825729	0.0422945	1.73821e-14	-0.755173	-0.353244	Yes
R-HSA-68962	Activation of the pre-replicative complex	-0.896798	0.0341991	-0.852141	0.0397715	1.89979e-14	-0.753475	-0.352548	Yes
R-HSA-2025928	Calcineurin activates NFAT	0.818087	0.0370965	0.8609	0.0362656	2.06094e-14	-0.752267	-0.352053	Yes
R-HSA-445355	Smooth Muscle Contraction	0.818739	0.0413823	0.771916	0.039241	2.06094e-14	0.752455	0.352131	Yes
R-HSA-4570464	SUMOylation of RNA binding proteins	0.815313	0.0500681	0.864011	0.0367403	2.06094e-14	-0.752563	-0.352175	Yes
R-HSA-168249	Innate Immune System	0.844597	0.0623759	0.773841	0.0595349	2.19775e-14	0.751166	0.351602	Yes
R-HSA-373753	Nephrin family interactions	0.796872	0.0438416	0.844489	0.039128	2.26279e-14	-0.750741	-0.351428	Yes
R-HSA-975163	IRAK2 mediated activation of TAK1 complex upon TLR7/8 or 9 stimulation	0.855091	0.0578172	0.789736	0.0549618	2.27257e-14	0.750501	0.351329	Yes
R-HSA-140534	Caspase activation via Death Receptors in the presence of ligand	0.809515	0.0599344	0.735677	0.0648939	2.5728e-14	0.748593	0.350546	Yes
R-HSA-9617828	FOXO-mediated transcription of cell cycle genes	0.893561	0.0348661	0.927057	0.0252635	2.7038e-14	-0.748281	-0.350418	Yes
R-HSA-3371453	Regulation of HSF1-mediated heat shock response	0.768482	0.0499206	0.821164	0.042937	3.08366e-14	-0.746205	-0.349564	Yes
R-HSA-8978868	Fatty acid metabolism	-0.804456	0.0491463	-0.856792	0.0430378	3.3973e-14	0.744778	0.348977	Yes
R-HSA-166166	MyD88-independent TLR4 cascade	0.866378	0.0446665	0.810268	0.0501638	3.58763e-14	0.743565	0.348478	Yes
R-HSA-937061	TRIF(TICAM1)-mediated TLR4 signaling	0.866378	0.0446665	0.810268	0.0501638	3.58763e-14	0.743565	0.348478	Yes
R-HSA-446219	Synthesis of substrates in N-glycan biosythesis	-0.788251	0.0733511	-0.856604	0.0506757	3.6834e-14	0.74366	0.348517	Yes
R-HSA-109581	Apoptosis	0.685436	0.050066	0.630202	0.0466426	3.99248e-14	0.742117	0.347882	Yes
R-HSA-5693532	DNA Double-Strand Break Repair	-0.841117	0.0523326	-0.767273	0.0688341	4.06198e-14	-0.741441	-0.347603	Yes
R-HSA-937072	TRAF6-mediated induction of TAK1 complex within TLR4 complex	0.855401	0.0579068	0.791283	0.0543305	4.1272e-14	0.741457	0.347609	Yes
R-HSA-5578749	Transcriptional regulation by small RNAs	0.77418	0.0588717	0.835028	0.0494529	4.19225e-14	-0.741271	-0.347533	Yes
R-HSA-1963642	PI3K events in ERBB2 signaling	0.108578	0.393614	0.407109	0.155791	4.2301e-14	-0.7419	-0.347792	Yes
R-HSA-6796648	TP53 Regulates Transcription of DNA Repair Genes	-0.844237	0.0536724	-0.77757	0.0597363	4.42632e-14	-0.740032	-0.347022	Yes
R-HSA-212436	Generic Transcription Pathway	-0.820542	0.053084	-0.758563	0.0542841	5.04191e-14	-0.738265	-0.346293	Yes
R-HSA-190236	Signaling by FGFR	0.825539	0.0630509	0.882531	0.0416648	5.65493e-14	-0.737127	-0.345823	Yes
R-HSA-5603041	IRAK4 deficiency (TLR2/4)	0.873762	0.0456976	0.815708	0.0528696	5.88828e-14	0.735852	0.345296	Yes
R-HSA-8986944	Transcriptional Regulation by MECP2	0.843026	0.0317639	0.876239	0.0276797	7.11276e-14	-0.733502	-0.344324	Yes
R-HSA-6805567	Keratinization	-0.826474	0.0590389	-0.888724	0.0521867	7.17361e-14	0.733176	0.344189	Yes
R-HSA-6809371	Formation of the cornified envelope	-0.826474	0.0590389	-0.888724	0.0521867	7.17361e-14	0.733176	0.344189	Yes
R-HSA-1614558	Degradation of cysteine and homocysteine	-0.873187	0.0442465	-0.915128	0.0325018	7.32131e-14	0.733022	0.344126	Yes
R-HSA-159230	Transport of the SLBP Dependant Mature mRNA	0.510165	0.120492	0.615123	0.0745829	7.94497e-14	-0.732025	-0.343713	Yes
R-HSA-975138	TRAF6 mediated induction of NFkB and MAP kinases upon TLR7/8 or 9 activation	0.874464	0.0397889	0.827109	0.0424191	8.05416e-14	0.73112	0.343338	Yes
R-HSA-8939243	RUNX1 interacts with co-factors whose precise effect on RUNX1 targets is not known	0.73966	0.0461408	0.78666	0.0387877	8.71327e-14	-0.73022	-0.342965	Yes
R-HSA-168138	Toll Like Receptor 9 (TLR9) Cascade	0.876869	0.0375313	0.83326	0.0388283	9.39769e-14	0.728873	0.342407	Yes
R-HSA-5654738	Signaling by FGFR2	0.821037	0.0660532	0.879655	0.043013	9.80839e-14	-0.728731	-0.342348	Yes
R-HSA-1266695	Interleukin-7 signaling	0.864566	0.0370078	0.900102	0.028252	1.06496e-13	-0.727331	-0.341767	Yes
R-HSA-9006925	Intracellular signaling by second messengers	0.689482	0.0807366	0.763199	0.055989	1.07052e-13	-0.727282	-0.341747	Yes
R-HSA-200425	Import of palmitoyl-CoA into the mitochondrial matrix	-0.767662	0.0722457	-0.834529	0.0517472	1.23293e-13	0.725231	0.340895	Yes
R-HSA-5696397	Gap-filling DNA repair synthesis and ligation in GG-NER	0.750222	0.0533672	0.799656	0.0385473	1.47744e-13	-0.722666	-0.339829	Yes
R-HSA-9020702	Interleukin-1 signaling	0.696774	0.0487644	0.634319	0.0587635	1.74962e-13	0.71972	0.338603	Yes
R-HSA-140837	Intrinsic Pathway of Fibrin Clot Formation	-0.841754	0.0372953	-0.881269	0.034315	1.94983e-13	0.71842	0.338061	Yes
R-HSA-6804760	Regulation of TP53 Activity through Methylation	0.854107	0.0438385	0.895267	0.0329397	2.13194e-13	-0.71734	-0.337611	Yes
R-HSA-2500257	Resolution of Sister Chromatid Cohesion	0.349341	0.367295	0.600148	0.0998587	2.50715e-13	-0.715987	-0.337047	Yes
R-HSA-3906995	Diseases associated with O-glycosylation of proteins	-0.875212	0.0359512	-0.909756	0.028545	3.04158e-13	0.712049	0.335402	Yes
R-HSA-159227	Transport of the SLBP independent Mature mRNA	0.526812	0.10944	0.621567	0.0710769	3.11721e-13	-0.711859	-0.335322	Yes
R-HSA-8956321	Nucleotide salvage	-0.836818	0.0477071	-0.88034	0.0344969	3.19507e-13	0.711307	0.335092	Yes
R-HSA-176033	Interactions of Vpr with host cellular proteins	0.701174	0.0826222	0.775008	0.058007	4.17907e-13	-0.707419	-0.333464	Yes
R-HSA-418990	Adherens junctions interactions	0.811901	0.0357758	0.772941	0.0351846	4.17907e-13	0.70701	0.333293	Yes
R-HSA-212165	Epigenetic regulation of gene expression	0.660986	0.0734364	0.732535	0.0605602	4.39821e-13	-0.706411	-0.333042	Yes
R-HSA-2173796	SMAD2/SMAD3:SMAD4 heterotrimer regulates transcription	0.784397	0.0549599	0.838924	0.0469115	4.91297e-13	-0.70476	-0.332349	Yes
R-HSA-73856	RNA Polymerase II Transcription Termination	0.787873	0.0573549	0.838286	0.0394398	5.61592e-13	-0.703074	-0.331642	Yes
R-HSA-9013700	NOTCH4 Activation and Transmission of Signal to the Nucleus	0.840635	0.0587034	0.782715	0.049964	5.88603e-13	0.702097	0.331231	Yes
R-HSA-3214815	HDACs deacetylate histones	0.778768	0.0552811	0.832981	0.0466688	6.2199e-13	-0.701258	-0.330879	Yes
R-HSA-5083635	Defective B3GALTL causes Peters-plus syndrome (PpS)	-0.905353	0.031272	-0.936089	0.026587	6.84588e-13	0.699839	0.330283	Yes
R-HSA-5668599	RHO GTPases Activate NADPH Oxidases	0.80341	0.0523077	0.735694	0.0664544	7.12127e-13	0.698817	0.329853	Yes
R-HSA-5663084	Diseases of carbohydrate metabolism	0.827747	0.0495344	0.770132	0.0545143	7.25513e-13	0.698603	0.329763	Yes
R-HSA-445095	Interaction between L1 and Ankyrins	0.739517	0.0707746	0.80263	0.0510064	8.65228e-13	-0.696527	-0.328889	Yes
R-HSA-72203	Processing of Capped Intron-Containing Pre-mRNA	0.791286	0.064683	0.845963	0.0418561	8.89314e-13	-0.696187	-0.328746	Yes
R-HSA-3899300	SUMOylation of transcription cofactors	0.803537	0.0480084	0.847853	0.0369885	9.04444e-13	-0.695672	-0.328529	Yes
R-HSA-3769402	Deactivation of the beta-catenin transactivating complex	0.784917	0.0548711	0.833926	0.0401157	1.13997e-12	-0.692426	-0.32716	Yes
R-HSA-5357956	TNFR1-induced NFkappaB signaling pathway	0.847211	0.0411983	0.883025	0.028613	1.18025e-12	-0.691919	-0.326947	Yes
R-HSA-2173788	Downregulation of TGF-beta receptor signaling	0.849845	0.0350343	0.88395	0.0299895	1.29309e-12	-0.69033	-0.326276	Yes
R-HSA-400685	Sema4D in semaphorin signaling	0.858997	0.0333101	0.824312	0.0317549	1.29978e-12	0.690064	0.326164	Yes
R-HSA-168898	Toll-like Receptor Cascades	0.877019	0.0365504	0.834535	0.0409487	1.35611e-12	0.689236	0.325813	Yes
R-HSA-198753	ERK/MAPK targets	0.836778	0.0455136	0.787536	0.0461156	1.43681e-12	0.688444	0.325479	Yes
R-HSA-5625970	RHO GTPases activate KTN1	0.841305	0.0412685	0.792394	0.0475821	1.43849e-12	0.688229	0.325388	Yes
R-HSA-171007	p38MAPK events	0.83205	0.0380614	0.783307	0.0487486	1.55329e-12	0.686988	0.324863	Yes
R-HSA-4615885	SUMOylation of DNA replication proteins	0.557796	0.101242	0.639949	0.0615057	1.56939e-12	-0.687535	-0.325094	Yes
R-HSA-2424491	DAP12 signaling	0.716054	0.0560681	0.775266	0.0550173	1.60003e-12	-0.68666	-0.324725	Yes
R-HSA-975634	Retinoid metabolism and transport	-0.669079	0.0765442	-0.737557	0.0572906	1.83698e-12	0.684938	0.323996	Yes
R-HSA-5693538	Homology Directed Repair	-0.837086	0.044273	-0.78081	0.0564488	1.84758e-12	-0.684253	-0.323706	Yes
R-HSA-180910	Vpr-mediated nuclear import of PICs	0.649296	0.0816839	0.719951	0.0573507	1.85546e-12	-0.684717	-0.323902	Yes
R-HSA-1638091	Heparan sulfate/heparin (HS-GAG) metabolism	-0.772403	0.0792186	-0.830445	0.0369026	1.85995e-12	0.685048	0.324042	Yes
R-HSA-170834	Signaling by TGF-beta Receptor Complex	0.901895	0.0212368	0.922632	0.0185723	1.9686e-12	-0.683492	-0.323383	Yes
R-HSA-3299685	Detoxification of Reactive Oxygen Species	0.658358	0.0510721	0.598622	0.05891	2.63111e-12	0.678989	0.321474	Yes
R-HSA-5173214	O-glycosylation of TSR domain-containing proteins	-0.906826	0.031185	-0.936727	0.0267502	2.65189e-12	0.679095	0.321519	Yes
R-HSA-4085377	SUMOylation of SUMOylation proteins	0.693589	0.0648077	0.750485	0.0476494	2.77161e-12	-0.678567	-0.321294	Yes
R-HSA-1169410	Antiviral mechanism by IFN-stimulated genes	0.760232	0.0698372	0.699452	0.0506109	2.91166e-12	0.677814	0.320974	Yes
R-HSA-166016	Toll Like Receptor 4 (TLR4) Cascade	0.875404	0.0346726	0.83446	0.0406665	2.93743e-12	0.677127	0.320683	Yes
R-HSA-5669034	TNFs bind their physiological receptors	-0.78171	0.0712596	-0.851035	0.0631672	3.38948e-12	0.6753	0.319906	Yes
R-HSA-446193	Biosynthesis of the N-glycan precursor (dolichol lipid-linked oligosaccharide, LLO) and transfer to a nascent protein	-0.826258	0.05847	-0.877559	0.0434062	3.5682e-12	0.674692	0.319648	Yes
R-HSA-430116	GP1b-IX-V activation signalling	0.862185	0.0327735	0.892206	0.0263227	3.60531e-12	-0.674387	-0.319518	Yes
R-HSA-9613354	Lipophagy	0.758837	0.0577432	0.702811	0.0513726	4.2199e-12	0.671975	0.318491	Yes
R-HSA-982772	Growth hormone receptor signaling	0.823335	0.0259198	0.79387	0.0292014	4.31544e-12	0.671357	0.318228	Yes
R-HSA-76005	Response to elevated platelet cytosolic Ca2+	0.783434	0.0630382	0.71843	0.0624874	6.30356e-12	0.665943	0.315919	Yes
R-HSA-877312	Regulation of IFNG signaling	0.883535	0.0285041	0.851304	0.032293	6.60647e-12	0.665079	0.31555	Yes
R-HSA-114608	Platelet degranulation	0.786681	0.0650833	0.722158	0.0610805	7.31127e-12	0.663738	0.314977	Yes
R-HSA-3301854	Nuclear Pore Complex (NPC) Disassembly	0.538573	0.0963125	0.617327	0.0646766	8.55029e-12	-0.661713	-0.314111	Yes
R-HSA-180746	Nuclear import of Rev protein	0.804857	0.0537117	0.851466	0.040558	8.72895e-12	-0.661219	-0.313899	Yes
R-HSA-6806667	Metabolism of fat-soluble vitamins	-0.668946	0.0756069	-0.734629	0.0575773	1.01886e-11	0.658922	0.312916	Yes
R-HSA-416572	Sema4D induced cell migration and growth-cone collapse	0.868931	0.0308631	0.839386	0.0277688	1.04089e-11	0.658371	0.31268	Yes
R-HSA-2160916	Hyaluronan uptake and degradation	0.6156	0.118175	0.494802	0.11793	1.11298e-11	0.657169	0.312165	Yes
R-HSA-3214841	PKMTs methylate histone lysines	0.472337	0.103996	0.558413	0.0730721	1.32563e-11	-0.654947	-0.311211	Yes
R-HSA-877300	Interferon gamma signaling	0.746152	0.0828211	0.664501	0.0790743	1.50726e-11	0.652707	0.31025	Yes
R-HSA-165054	Rev-mediated nuclear export of HIV RNA	0.650139	0.0799906	0.716636	0.0573585	1.72174e-11	-0.651013	-0.309522	Yes
R-HSA-1614635	Sulfur amino acid metabolism	-0.90225	0.0277404	-0.926292	0.02155	1.80555e-11	0.650172	0.30916	Yes
R-HSA-170822	Regulation of Glucokinase by Glucokinase Regulatory Protein	0.584529	0.08334	0.654509	0.0612928	1.95674e-11	-0.648931	-0.308626	Yes
R-HSA-5619107	Defective TPR may confer susceptibility towards thyroid papillary carcinoma (TPC)	0.584529	0.08334	0.654509	0.0612928	1.95674e-11	-0.648931	-0.308626	Yes
R-HSA-68877	Mitotic Prometaphase	-0.78892	0.0625914	-0.715327	0.0774387	2.03963e-11	-0.647701	-0.308097	Yes
R-HSA-446652	Interleukin-1 family signaling	0.743724	0.0499765	0.689591	0.0554119	2.12833e-11	0.647108	0.307841	Yes
R-HSA-168333	NEP/NS2 Interacts with the Cellular Export Machinery	0.723708	0.0604073	0.77574	0.0469903	2.38872e-11	-0.64571	-0.307239	Yes
R-HSA-416700	Other semaphorin interactions	0.802684	0.062255	0.739129	0.0639673	2.7226e-11	0.6434	0.306243	Yes
R-HSA-5693607	Processing of DNA double-strand break ends	-0.842792	0.0429526	-0.797034	0.0469055	2.7226e-11	-0.643398	-0.306243	Yes
R-HSA-2173795	Downregulation of SMAD2/3:SMAD4 transcriptional activity	0.869988	0.0378881	0.902103	0.0288091	2.76008e-11	-0.643434	-0.306258	Yes
R-HSA-442982	Ras activation upon Ca2+ influx through NMDA receptor	0.42779	0.176892	0.557121	0.0981139	2.8683e-11	-0.643139	-0.306131	Yes
R-HSA-140875	Common Pathway of Fibrin Clot Formation	-0.661894	0.0812743	-0.722035	0.0468227	3.26601e-11	0.64114	0.305268	Yes
R-HSA-109704	PI3K Cascade	0.189592	0.360785	0.416539	0.117687	3.35815e-11	-0.641082	-0.305243	Yes
R-HSA-168928	DDX58/IFIH1-mediated induction of interferon-alpha/beta	0.828343	0.0419857	0.790823	0.0354147	3.54522e-11	0.63935	0.304495	Yes
R-HSA-5683826	Surfactant metabolism	0.58091	0.10544	0.280012	0.361102	3.63102e-11	0.63817	0.303985	Yes
R-HSA-157118	Signaling by NOTCH	0.851313	0.04612	0.805859	0.0455782	3.87266e-11	0.637776	0.303815	Yes
R-HSA-901032	ER Quality Control Compartment (ERQC)	0.804126	0.0649586	0.856775	0.0461563	3.96423e-11	-0.637702	-0.303783	Yes
R-HSA-1483249	Inositol phosphate metabolism	0.804348	0.0480442	0.844886	0.0368854	4.0806e-11	-0.637134	-0.303537	Yes
R-HSA-5693567	HDR through Homologous Recombination (HRR) or Single Strand Annealing (SSA)	-0.854066	0.0409873	-0.808907	0.0476375	4.2654e-11	-0.63603	-0.303059	Yes
R-HSA-9615017	FOXO-mediated transcription of oxidative stress, metabolic and neuronal genes	0.857281	0.0327922	0.88678	0.02836	4.97719e-11	-0.633972	-0.302169	Yes
R-HSA-177243	Interactions of Rev with host cellular proteins	0.812051	0.0494001	0.854113	0.0389895	5.28839e-11	-0.633111	-0.301795	Yes
R-HSA-196757	Metabolism of folate and pterines	-0.885925	0.0397399	-0.919379	0.0308327	5.69487e-11	0.631976	0.301303	Yes
R-HSA-3232142	SUMOylation of ubiquitinylation proteins	0.650496	0.0697369	0.70819	0.0524882	5.86802e-11	-0.631504	-0.301099	Yes
R-HSA-1257604	PIP3 activates AKT signaling	0.59218	0.0671562	0.654421	0.0614385	6.07616e-11	-0.630732	-0.300764	Yes
R-HSA-1433559	Regulation of KIT signaling	0.865843	0.0363405	0.894679	0.0254109	6.68307e-11	-0.629434	-0.300201	Yes
R-HSA-2022090	Assembly of collagen fibrils and other multimeric structures	-0.854669	0.0418311	-0.907271	0.0266583	2.70516e-23	1.04298	0.462392	No
R-HSA-70268	Pyruvate metabolism	-0.741668	0.0629038	-0.817233	0.0432956	9.74733e-21	0.960445	0.432894	No
R-HSA-4085001	Sialic acid metabolism	-0.753193	0.0819537	-0.832736	0.0557997	3.54512e-15	0.780163	0.363411	No
R-HSA-5357905	Regulation of TNFR1 signaling	0.850782	0.0395943	0.889077	0.0270736	4.61107e-15	-0.775811	-0.36165	No
R-HSA-5693579	Homologous DNA Pairing and Strand Exchange	-0.763528	0.0384668	-0.707862	0.0513775	2.13949e-14	-0.751307	-0.35166	No
R-HSA-1474290	Collagen formation	-0.832711	0.0485553	-0.879533	0.0385607	2.57528e-13	0.714509	0.33643	No
R-HSA-1660514	Synthesis of PIPs at the Golgi membrane	0.655264	0.0666992	0.722335	0.0569842	2.65352e-13	-0.713927	-0.336187	No
R-HSA-166208	mTORC1-mediated signalling	0.717773	0.0348453	0.681218	0.0322706	3.84685e-13	0.708386	0.333869	No
R-HSA-445144	Signal transduction by L1	0.795211	0.0588881	0.739544	0.0488493	2.03293e-12	0.683023	0.323185	No
R-HSA-1221632	Meiotic synapsis	0.86765	0.0276835	0.897811	0.0294495	4.63608e-12	-0.67032	-0.317786	No
R-HSA-75893	TNF signaling	0.882884	0.0271524	0.908203	0.0231178	7.48563e-12	-0.663431	-0.314845	No
R-HSA-211897	Cytochrome P450 - arranged by substrate type	-0.277829	0.376195	-0.523414	0.129202	1.0674e-11	0.658873	0.312895	No
R-HSA-6803157	Antimicrobial peptides	0.712267	0.085606	0.62582	0.0856585	2.0268e-11	0.648042	0.308243	No
R-HSA-69190	DNA strand elongation	-0.885557	0.035421	-0.84735	0.0396431	3.34193e-11	-0.640076	-0.304809	No
R-HSA-168164	Toll Like Receptor 3 (TLR3) Cascade	0.880663	0.0315928	0.843873	0.0400507	6.39098e-11	0.629646	0.300293	No
R-HSA-901042	Calnexin/calreticulin cycle	0.838147	0.0537529	0.881462	0.0387419	6.68307e-11	-0.629383	-0.300179	No

## Sheet: Reactome Validation
GO Term	Pathway	Mean cases	SD cases	Mean controls	SD controls	FDR q	Effect size (d)	Effect size (r)	Also in Discovery
R-HSA-9617828	FOXO-mediated transcription of cell cycle genes	0.893561	0.0348661	0.927057	0.0252635	1.16436e-45	-2.05666	-0.716914	Yes
R-HSA-6806003	Regulation of TP53 Expression and Degradation	0.855309	0.0348507	0.899208	0.026789	5.22349e-45	-2.02011	-0.710635	Yes
R-HSA-6804757	Regulation of TP53 Degradation	0.871534	0.0389212	0.913538	0.0263131	1.20195e-44	-1.99955	-0.707027	Yes
R-HSA-9617324	Negative regulation of NMDA receptor-mediated neuronal transmission	0.612746	0.0910387	0.742669	0.0591543	1.16691e-43	-1.95727	-0.699431	Yes
R-HSA-975577	N-Glycan antennae elongation	0.836586	0.0464624	0.886926	0.0354417	1.67776e-40	-1.83563	-0.676184	Yes
R-HSA-9615017	FOXO-mediated transcription of oxidative stress, metabolic and neuronal genes	0.857281	0.0327922	0.88678	0.02836	1.49994e-38	-1.76099	-0.660838	Yes
R-HSA-844456	The NLRP3 inflammasome	0.85822	0.0503216	0.770606	0.0623325	9.9847e-37	1.69242	0.645967	Yes
R-HSA-8957275	Post-translational protein phosphorylation	0.795784	0.0619572	0.721337	0.0573784	1.98894e-36	1.67949	0.643078	Yes
R-HSA-71240	Tryptophan catabolism	-0.877838	0.0397393	-0.923782	0.0249977	2.23372e-35	1.6372	0.633431	Yes
R-HSA-73857	RNA Polymerase II Transcription	-0.847324	0.053728	-0.777532	0.0581977	7.32539e-35	-1.61726	-0.628778	Yes
R-HSA-392517	Rap1 signalling	0.751917	0.0579279	0.825514	0.0474846	7.49138e-35	-1.61581	-0.628437	Yes
R-HSA-168256	Immune System	0.829991	0.0643725	0.757313	0.0566453	1.82063e-34	1.60087	0.624903	Yes
R-HSA-381426	Regulation of Insulin-like Growth Factor (IGF) transport and uptake by Insulin-like Growth Factor Binding Proteins (IGFBPs)	0.803495	0.0642492	0.726605	0.0568865	2.99231e-34	1.59203	0.622791	Yes
R-HSA-877300	Interferon gamma signaling	0.746152	0.0828211	0.664501	0.0790743	4.82424e-34	1.58375	0.620804	Yes
R-HSA-212436	Generic Transcription Pathway	-0.820542	0.053084	-0.758563	0.0542841	8.08134e-34	-1.57395	-0.618434	Yes
R-HSA-5576892	Phase 0 - rapid depolarisation	-0.847546	0.041077	-0.781713	0.0511867	1.05229e-33	-1.5691	-0.617256	Yes
R-HSA-438066	Unblocking of NMDA receptors, glutamate binding and activation	-0.744416	0.059582	-0.644448	0.0798894	1.62737e-33	-1.56152	-0.615403	Yes
R-HSA-140534	Caspase activation via Death Receptors in the presence of ligand	0.809515	0.0599344	0.735677	0.0648939	3.26401e-33	1.54947	0.612441	Yes
R-HSA-8943724	Regulation of PTEN gene transcription	0.688411	0.0799216	0.782993	0.0580022	7.00882e-33	-1.53722	-0.609401	Yes
R-HSA-3700989	Transcriptional Regulation by TP53	0.73828	0.0700617	0.826499	0.0574682	1.14315e-32	-1.52918	-0.607393	Yes
R-HSA-5633007	Regulation of TP53 Activity	0.532923	0.112194	0.662119	0.0646248	1.15286e-32	-1.52788	-0.607066	Yes
R-HSA-1236975	Antigen processing-Cross presentation	0.643766	0.0475555	0.57935	0.0543609	2.36601e-32	1.51518	0.603866	Yes
R-HSA-9020702	Interleukin-1 signaling	0.696774	0.0487644	0.634319	0.0587635	2.36601e-32	1.51502	0.603824	Yes
R-HSA-446652	Interleukin-1 family signaling	0.743724	0.0499765	0.689591	0.0554119	2.73269e-32	1.51228	0.603131	Yes
R-HSA-9022692	Regulation of MECP2 expression and activity	0.794164	0.0438602	0.839216	0.0336992	3.11136e-32	-1.50998	-0.602546	Yes
R-HSA-1614558	Degradation of cysteine and homocysteine	-0.873187	0.0442465	-0.915128	0.0325018	3.73508e-32	1.50678	0.601731	Yes
R-HSA-9005891	Loss of function of MECP2 in Rett syndrome	0.757165	0.0654568	0.820784	0.0471061	8.26356e-31	-1.45831	-0.589166	Yes
R-HSA-9005895	Pervasive developmental disorders	0.757165	0.0654568	0.820784	0.0471061	8.26356e-31	-1.45831	-0.589166	Yes
R-HSA-1236974	ER-Phagosome pathway	0.672483	0.0469259	0.603087	0.0562037	1.15554e-30	1.45199	0.587496	Yes
R-HSA-74160	Gene expression (Transcription)	-0.845002	0.0561736	-0.771831	0.062172	1.33393e-30	-1.44882	-0.586653	Yes
R-HSA-5357769	Caspase activation via extrinsic apoptotic signalling pathway	0.804721	0.0681391	0.723581	0.0666179	2.25837e-30	1.4404	0.584412	Yes
R-HSA-2173795	Downregulation of SMAD2/3:SMAD4 transcriptional activity	0.869988	0.0378881	0.902103	0.0288091	6.29307e-30	-1.42436	-0.580103	Yes
R-HSA-9613354	Lipophagy	0.758837	0.0577432	0.702811	0.0513726	6.90478e-30	1.42249	0.579596	Yes
R-HSA-909733	Interferon alpha/beta signaling	0.757274	0.0804639	0.652044	0.0631768	1.46952e-29	1.41082	0.576426	Yes
R-HSA-975576	N-glycan antennae elongation in the medial/trans-Golgi	0.738922	0.0560789	0.807447	0.0376065	1.70789e-29	-1.4083	-0.575736	Yes
R-HSA-977068	Termination of O-glycan biosynthesis	-0.831247	0.0619751	-0.732455	0.0728782	7.18543e-29	-1.38545	-0.569441	Yes
R-HSA-1614635	Sulfur amino acid metabolism	-0.90225	0.0277404	-0.926292	0.02155	8.85658e-29	1.38219	0.568534	Yes
R-HSA-168249	Innate Immune System	0.844597	0.0623759	0.773841	0.0595349	9.09906e-29	1.38134	0.568297	Yes
R-HSA-9006925	Intracellular signaling by second messengers	0.689482	0.0807366	0.763199	0.055989	9.79519e-29	-1.38008	-0.567948	Yes
R-HSA-389356	CD28 co-stimulation	0.868564	0.0366221	0.907097	0.026839	7.54793e-28	-1.34848	-0.55904	Yes
R-HSA-1280215	Cytokine Signaling in Immune system	0.754334	0.0705541	0.651787	0.0690055	1.00232e-27	1.3438	0.557703	Yes
R-HSA-445355	Smooth Muscle Contraction	0.818739	0.0413823	0.771916	0.039241	1.17731e-27	1.34101	0.556904	Yes
R-HSA-8986944	Transcriptional Regulation by MECP2	0.843026	0.0317639	0.876239	0.0276797	1.34729e-27	-1.33891	-0.556302	Yes
R-HSA-3769402	Deactivation of the beta-catenin transactivating complex	0.784917	0.0548711	0.833926	0.0401157	2.46145e-27	-1.32938	-0.553561	Yes
R-HSA-109581	Apoptosis	0.685436	0.050066	0.630202	0.0466426	5.18571e-27	1.31775	0.550187	Yes
R-HSA-196854	Metabolism of vitamins and cofactors	-0.657813	0.0634605	-0.735639	0.044905	1.58595e-26	1.3006	0.545166	Yes
R-HSA-5656121	Translesion synthesis by POLI	0.817146	0.0498044	0.873063	0.0394937	2.91931e-26	-1.29067	-0.542229	Yes
R-HSA-877312	Regulation of IFNG signaling	0.883535	0.0285041	0.851304	0.032293	5.7001e-26	1.27981	0.538997	Yes
R-HSA-6798695	Neutrophil degranulation	0.838465	0.0503804	0.752968	0.0606546	5.72951e-26	1.27958	0.538928	Yes
R-HSA-913531	Interferon Signaling	0.750435	0.0786403	0.665211	0.0621603	6.89061e-26	1.27603	0.537867	Yes
R-HSA-622312	Inflammasomes	0.839316	0.0470451	0.749596	0.0581176	1.13635e-25	1.26809	0.535482	Yes
R-HSA-5602498	MyD88 deficiency (TLR2/4)	0.871412	0.044133	0.805047	0.0492314	1.89322e-25	1.25975	0.532961	Yes
R-HSA-110312	Translesion synthesis by REV1	0.81822	0.0503404	0.871633	0.0401567	2.09704e-25	-1.25792	-0.532408	Yes
R-HSA-6783310	Fanconi Anemia Pathway	-0.78578	0.0415863	-0.719294	0.050292	2.09704e-25	-1.25765	-0.532325	Yes
R-HSA-936964	Activation of IRF3/IRF7 mediated by TBK1/IKK epsilon	0.84805	0.060416	0.774124	0.0628882	2.09704e-25	1.25797	0.532422	Yes
R-HSA-196757	Metabolism of folate and pterines	-0.885925	0.0397399	-0.919379	0.0308327	3.98538e-25	1.2477	0.529298	Yes
R-HSA-389357	CD28 dependent PI3K/Akt signaling	0.504895	0.167567	0.659451	0.0695903	4.74691e-25	-1.24504	-0.528485	Yes
R-HSA-933542	TRAF6 mediated NF-kB activation	0.856952	0.0380234	0.806665	0.0349328	5.47257e-25	1.24245	0.52769	Yes
R-HSA-1483249	Inositol phosphate metabolism	0.804348	0.0480442	0.844886	0.0368854	6.43129e-25	-1.23958	-0.52681	Yes
R-HSA-5603041	IRAK4 deficiency (TLR2/4)	0.873762	0.0456976	0.815708	0.0528696	6.43129e-25	1.23953	0.526797	Yes
R-HSA-8964539	Glutamate and glutamine metabolism	0.231185	0.417733	0.549442	0.096839	1.42179e-24	-1.22736	-0.523043	Yes
R-HSA-2025928	Calcineurin activates NFAT	0.818087	0.0370965	0.8609	0.0362656	1.4788e-24	-1.22643	-0.522754	Yes
R-HSA-5654738	Signaling by FGFR2	0.821037	0.0660532	0.879655	0.043013	1.78547e-24	-1.22313	-0.521733	Yes
R-HSA-170834	Signaling by TGF-beta Receptor Complex	0.901895	0.0212368	0.922632	0.0185723	1.84788e-24	-1.22241	-0.521507	Yes
R-HSA-212165	Epigenetic regulation of gene expression	0.660986	0.0734364	0.732535	0.0605602	1.9987e-24	-1.22109	-0.521098	Yes
R-HSA-190236	Signaling by FGFR	0.825539	0.0630509	0.882531	0.0416648	2.90675e-24	-1.21534	-0.519307	Yes
R-HSA-5607763	CLEC7A (Dectin-1) induces NFAT activation	0.818068	0.039732	0.866906	0.0387261	3.18937e-24	-1.21377	-0.518817	Yes
R-HSA-982772	Growth hormone receptor signaling	0.823335	0.0259198	0.79387	0.0292014	4.57067e-24	1.20778	0.516941	Yes
R-HSA-442982	Ras activation upon Ca2+ influx through NMDA receptor	0.42779	0.176892	0.557121	0.0981139	4.94789e-24	-1.20661	-0.516574	Yes
R-HSA-109704	PI3K Cascade	0.189592	0.360785	0.416539	0.117687	6.6851e-24	-1.20159	-0.514998	Yes
R-HSA-2173796	SMAD2/SMAD3:SMAD4 heterotrimer regulates transcription	0.784397	0.0549599	0.838924	0.0469115	1.03812e-23	-1.19485	-0.51287	Yes
R-HSA-1257604	PIP3 activates AKT signaling	0.59218	0.0671562	0.654421	0.0614385	2.89679e-23	-1.17844	-0.50765	Yes
R-HSA-5655862	Translesion synthesis by POLK	0.819976	0.0529143	0.875165	0.0386876	3.25385e-23	-1.17653	-0.50704	Yes
R-HSA-3108232	SUMO E3 ligases SUMOylate target proteins	0.75368	0.0483943	0.801767	0.0351521	3.3037e-23	-1.17624	-0.506945	Yes
R-HSA-1442490	Collagen degradation	-0.85189	0.0457414	-0.911927	0.0276894	3.67286e-23	1.17438	0.506351	Yes
R-HSA-193692	Regulated proteolysis of p75NTR	0.835067	0.0527235	0.768988	0.0545883	4.56184e-23	1.17065	0.505154	Yes
R-HSA-114508	Effects of PIP2 hydrolysis	0.297034	0.390053	0.59757	0.0908396	7.89084e-23	-1.16228	-0.502456	Yes
R-HSA-73614	Pyrimidine salvage	-0.829481	0.0688347	-0.90563	0.0404714	1.07725e-22	1.15725	0.500827	Yes
R-HSA-4551638	SUMOylation of chromatin organization proteins	0.637375	0.0921135	0.727789	0.0580281	1.27246e-22	-1.15441	-0.499907	Yes
R-HSA-373755	Semaphorin interactions	0.869183	0.0376673	0.812776	0.0411462	1.39028e-22	1.15275	0.499366	Yes
R-HSA-2173788	Downregulation of TGF-beta receptor signaling	0.849845	0.0350343	0.88395	0.0299895	1.64983e-22	-1.15006	-0.498491	Yes
R-HSA-157118	Signaling by NOTCH	0.851313	0.04612	0.805859	0.0455782	2.37405e-22	1.14401	0.496515	Yes
R-HSA-6804758	Regulation of TP53 Activity through Acetylation	0.726269	0.0697372	0.811975	0.058222	2.37405e-22	-1.14411	-0.496549	Yes
R-HSA-2990846	SUMOylation	0.732413	0.0523322	0.784725	0.0383065	4.96958e-22	-1.13262	-0.492777	Yes
R-HSA-3214815	HDACs deacetylate histones	0.778768	0.0552811	0.832981	0.0466688	7.29796e-22	-1.12649	-0.490755	Yes
R-HSA-211000	Gene Silencing by RNA	0.753439	0.0600352	0.822628	0.0496753	1.28276e-21	-1.11749	-0.487768	Yes
R-HSA-9013700	NOTCH4 Activation and Transmission of Signal to the Nucleus	0.840635	0.0587034	0.782715	0.049964	1.32078e-21	1.11681	0.487544	Yes
R-HSA-5260271	Diseases of Immune System	0.862626	0.0433837	0.806828	0.0482164	1.47914e-21	1.11488	0.4869	Yes
R-HSA-5602358	Diseases associated with the TLR signaling cascade	0.862626	0.0433837	0.806828	0.0482164	1.47914e-21	1.11488	0.4869	Yes
R-HSA-6804760	Regulation of TP53 Activity through Methylation	0.854107	0.0438385	0.895267	0.0329397	1.5755e-21	-1.11397	-0.486597	Yes
R-HSA-3899300	SUMOylation of transcription cofactors	0.803537	0.0480084	0.847853	0.0369885	3.5343e-21	-1.10147	-0.482413	Yes
R-HSA-1474228	Degradation of the extracellular matrix	-0.374481	0.310789	-0.644248	0.063419	3.79095e-21	1.10029	0.482016	Yes
R-HSA-5683826	Surfactant metabolism	0.58091	0.10544	0.280012	0.361102	6.3921e-21	1.09172	0.479127	Yes
R-HSA-1169410	Antiviral mechanism by IFN-stimulated genes	0.760232	0.0698372	0.699452	0.0506109	7.06004e-21	1.09025	0.478628	Yes
R-HSA-8939243	RUNX1 interacts with co-factors whose precise effect on RUNX1 targets is not known	0.73966	0.0461408	0.78666	0.0387877	1.24987e-20	-1.0813	-0.475591	Yes
R-HSA-168928	DDX58/IFIH1-mediated induction of interferon-alpha/beta	0.828343	0.0419857	0.790823	0.0354147	1.59267e-20	1.07735	0.474246	Yes
R-HSA-3781865	Diseases of glycosylation	-0.843952	0.0525132	-0.905438	0.0312818	1.77175e-20	1.07563	0.473659	Yes
R-HSA-75205	Dissolution of Fibrin Clot	-0.159812	0.426894	-0.511674	0.0929336	2.43028e-20	1.07065	0.471953	Yes
R-HSA-4570464	SUMOylation of RNA binding proteins	0.815313	0.0500681	0.864011	0.0367403	3.07364e-20	-1.06667	-0.470588	Yes
R-HSA-936837	Ion transport by P-type ATPases	0.328957	0.322116	0.56678	0.0811257	4.21703e-20	-1.06175	-0.468896	Yes
R-HSA-6804115	TP53 regulates transcription of additional cell cycle genes whose exact role in the p53 pathway remain uncertain	0.828733	0.0537241	0.882053	0.0396329	4.75e-20	-1.05975	-0.468206	Yes
R-HSA-168898	Toll-like Receptor Cascades	0.877019	0.0365504	0.834535	0.0409487	7.18372e-20	1.05299	0.465872	Yes
R-HSA-2129379	Molecules associated with elastic fibres	-0.812822	0.0504519	-0.867956	0.0327151	1.0405e-19	1.04696	0.463779	Yes
R-HSA-198753	ERK/MAPK targets	0.836778	0.0455136	0.787536	0.0461156	1.04644e-19	1.04665	0.463669	Yes
R-HSA-140837	Intrinsic Pathway of Fibrin Clot Formation	-0.841754	0.0372953	-0.881269	0.034315	1.08134e-19	1.04624	0.463529	Yes
R-HSA-977225	Amyloid fiber formation	0.823009	0.0775765	0.72317	0.0826645	1.1356e-19	1.04527	0.463192	Yes
R-HSA-1566948	Elastic fibre formation	-0.808201	0.048253	-0.869289	0.0321854	1.1364e-19	1.04525	0.463183	Yes
R-HSA-5362517	Signaling by Retinoic Acid	-0.774473	0.0643288	-0.852647	0.0464942	1.45075e-19	1.04134	0.461819	Yes
R-HSA-2682334	EPH-Ephrin signaling	0.820519	0.0323051	0.766207	0.0330844	1.8443e-19	1.03726	0.460397	Yes
R-HSA-5693607	Processing of DNA double-strand break ends	-0.842792	0.0429526	-0.797034	0.0469055	8.13604e-19	-1.0132	-0.451917	Yes
R-HSA-5609975	Diseases associated with glycosylation precursor biosynthesis	-0.822701	0.0536551	-0.885033	0.0319823	8.37886e-19	1.0128	0.451775	Yes
R-HSA-211859	Biological oxidations	-0.879232	0.0411821	-0.918923	0.0240101	8.62814e-19	1.01234	0.451611	Yes
R-HSA-418990	Adherens junctions interactions	0.811901	0.0357758	0.772941	0.0351846	1.66893e-18	1.00153	0.447759	Yes
R-HSA-5693532	DNA Double-Strand Break Repair	-0.841117	0.0523326	-0.767273	0.0688341	1.73983e-18	-1.00066	-0.447451	Yes
R-HSA-159236	Transport of Mature mRNA derived from an Intron-Containing Transcript	0.775434	0.0645517	0.843659	0.0464745	1.81783e-18	-0.999956	-0.447198	Yes
R-HSA-77387	Insulin receptor recycling	0.744447	0.0477908	0.675792	0.0606577	2.19817e-18	0.996904	0.446105	Yes
R-HSA-203927	MicroRNA (miRNA) biogenesis	0.643428	0.0886783	0.729736	0.0567411	2.60831e-18	-0.994194	-0.445133	Yes
R-HSA-917977	Transferrin endocytosis and recycling	0.738956	0.0492829	0.668259	0.0612877	3.24651e-18	0.990543	0.443821	Yes
R-HSA-168138	Toll Like Receptor 9 (TLR9) Cascade	0.876869	0.0375313	0.83326	0.0388283	4.13437e-18	0.986625	0.442409	Yes
R-HSA-373753	Nephrin family interactions	0.796872	0.0438416	0.844489	0.039128	4.14629e-18	-0.98664	-0.442415	Yes
R-HSA-430116	GP1b-IX-V activation signalling	0.862185	0.0327735	0.892206	0.0263227	4.69069e-18	-0.984606	-0.441681	Yes
R-HSA-1638091	Heparan sulfate/heparin (HS-GAG) metabolism	-0.772403	0.0792186	-0.830445	0.0369026	6.08772e-18	0.980473	0.440186	Yes
R-HSA-72202	Transport of Mature Transcript to Cytoplasm	0.775354	0.0674642	0.843275	0.0473837	7.76755e-18	-0.976419	-0.438717	Yes
R-HSA-168181	Toll Like Receptor 7/8 (TLR7/8) Cascade	0.873068	0.0403417	0.82373	0.0425566	8.61058e-18	0.974345	0.437964	Yes
R-HSA-975155	MyD88 dependent cascade initiated on endosome	0.873068	0.0403417	0.82373	0.0425566	8.61058e-18	0.974345	0.437964	Yes
R-HSA-917937	Iron uptake and transport	0.737547	0.041534	0.674876	0.049235	9.06601e-18	0.973471	0.437647	Yes
R-HSA-5696397	Gap-filling DNA repair synthesis and ligation in GG-NER	0.750222	0.0533672	0.799656	0.0385473	9.51833e-18	-0.972653	-0.437349	Yes
R-HSA-6796648	TP53 Regulates Transcription of DNA Repair Genes	-0.844237	0.0536724	-0.77757	0.0597363	1.26168e-17	-0.9674	-0.435436	Yes
R-HSA-8978868	Fatty acid metabolism	-0.804456	0.0491463	-0.856792	0.0430378	1.5977e-17	0.963644	0.434065	Yes
R-HSA-3108214	SUMOylation of DNA damage response and repair proteins	0.524273	0.102729	0.617931	0.063933	2.4562e-17	-0.956586	-0.431479	Yes
R-HSA-975138	TRAF6 mediated induction of NFkB and MAP kinases upon TLR7/8 or 9 activation	0.874464	0.0397889	0.827109	0.0424191	2.99761e-17	0.953253	0.430255	Yes
R-HSA-71387	Metabolism of carbohydrates	0.711548	0.0754075	0.621905	0.0696493	3.37697e-17	0.951156	0.429483	Yes
R-HSA-5578749	Transcriptional regulation by small RNAs	0.77418	0.0588717	0.835028	0.0494529	3.8082e-17	-0.949348	-0.428816	Yes
R-HSA-200425	Import of palmitoyl-CoA into the mitochondrial matrix	-0.767662	0.0722457	-0.834529	0.0517472	4.67125e-17	0.945971	0.42757	Yes
R-HSA-1266695	Interleukin-7 signaling	0.864566	0.0370078	0.900102	0.028252	5.05648e-17	-0.944654	-0.427084	Yes
R-HSA-166016	Toll Like Receptor 4 (TLR4) Cascade	0.875404	0.0346726	0.83446	0.0406665	5.49421e-17	0.943098	0.426508	Yes
R-HSA-3232142	SUMOylation of ubiquitinylation proteins	0.650496	0.0697369	0.70819	0.0524882	7.97843e-17	-0.936945	-0.424228	Yes
R-HSA-2424491	DAP12 signaling	0.716054	0.0560681	0.775266	0.0550173	1.13291e-16	-0.931181	-0.422084	Yes
R-HSA-72187	mRNA 3'-end processing	0.788752	0.0558493	0.844307	0.0393051	1.16733e-16	-0.930655	-0.421888	Yes
R-HSA-180910	Vpr-mediated nuclear import of PICs	0.649296	0.0816839	0.719951	0.0573507	1.26691e-16	-0.929231	-0.421357	Yes
R-HSA-166058	MyD88:MAL(TIRAP) cascade initiated on plasma membrane	0.87742	0.0386553	0.827312	0.0438922	1.44296e-16	0.926877	0.420479	Yes
R-HSA-168179	Toll Like Receptor TLR1:TLR2 Cascade	0.87742	0.0386553	0.827312	0.0438922	1.44296e-16	0.926877	0.420479	Yes
R-HSA-168188	Toll Like Receptor TLR6:TLR2 Cascade	0.87742	0.0386553	0.827312	0.0438922	1.44296e-16	0.926877	0.420479	Yes
R-HSA-181438	Toll Like Receptor 2 (TLR2) Cascade	0.87742	0.0386553	0.827312	0.0438922	1.44296e-16	0.926877	0.420479	Yes
R-HSA-5686938	Regulation of TLR by endogenous ligand	0.859001	0.0496925	0.790766	0.0545707	1.54079e-16	0.925735	0.420052	Yes
R-HSA-1963642	PI3K events in ERBB2 signaling	0.108578	0.393614	0.407109	0.155791	2.0072e-16	-0.921514	-0.418473	Yes
R-HSA-140877	Formation of Fibrin Clot (Clotting Cascade)	-0.808109	0.0555604	-0.859452	0.0345261	2.01055e-16	0.921403	0.418431	Yes
R-HSA-446219	Synthesis of substrates in N-glycan biosythesis	-0.788251	0.0733511	-0.856604	0.0506757	2.18622e-16	0.919816	0.417837	Yes
R-HSA-1474165	Reproduction	0.839173	0.0301293	0.883782	0.0300553	2.46474e-16	-0.917613	-0.41701	Yes
R-HSA-1638074	Keratan sulfate/keratin metabolism	-0.226007	0.411531	-0.574752	0.0837772	4.31993e-16	0.908463	0.413566	Yes
R-HSA-4085377	SUMOylation of SUMOylation proteins	0.693589	0.0648077	0.750485	0.0476494	4.47291e-16	-0.907818	-0.413323	Yes
R-HSA-5663084	Diseases of carbohydrate metabolism	0.827747	0.0495344	0.770132	0.0545143	4.74786e-16	0.90665	0.412882	Yes
R-HSA-73856	RNA Polymerase II Transcription Termination	0.787873	0.0573549	0.838286	0.0394398	6.70737e-16	-0.901003	-0.410745	Yes
R-HSA-171007	p38MAPK events	0.83205	0.0380614	0.783307	0.0487486	8.80377e-16	0.896284	0.408954	Yes
R-HSA-5693538	Homology Directed Repair	-0.837086	0.044273	-0.78081	0.0564488	1.04571e-15	-0.893434	-0.407871	Yes
R-HSA-2500257	Resolution of Sister Chromatid Cohesion	0.349341	0.367295	0.600148	0.0998587	1.25524e-15	-0.890588	-0.406786	Yes
R-HSA-5693567	HDR through Homologous Recombination (HRR) or Single Strand Annealing (SSA)	-0.854066	0.0409873	-0.808907	0.0476375	1.54214e-15	-0.88705	-0.405436	Yes
R-HSA-3301854	Nuclear Pore Complex (NPC) Disassembly	0.538573	0.0963125	0.617327	0.0646766	1.90322e-15	-0.883708	-0.404159	Yes
R-HSA-445095	Interaction between L1 and Ankyrins	0.739517	0.0707746	0.80263	0.0510064	2.20386e-15	-0.881178	-0.40319	Yes
R-HSA-166166	MyD88-independent TLR4 cascade	0.866378	0.0446665	0.810268	0.0501638	3.64113e-15	0.872359	0.399803	Yes
R-HSA-937061	TRIF(TICAM1)-mediated TLR4 signaling	0.866378	0.0446665	0.810268	0.0501638	3.64113e-15	0.872359	0.399803	Yes
R-HSA-1474244	Extracellular matrix organization	-0.684081	0.0609772	-0.760572	0.0440716	4.17523e-15	0.870068	0.39892	Yes
R-HSA-1500620	Meiosis	0.876029	0.0259002	0.908808	0.0267594	4.65433e-15	-0.868285	-0.398232	Yes
R-HSA-176187	Activation of ATR in response to replication stress	-0.8555	0.0477517	-0.793083	0.0553455	5.33714e-15	-0.865925	-0.397321	Yes
R-HSA-5669034	TNFs bind their physiological receptors	-0.78171	0.0712596	-0.851035	0.0631672	7.63417e-15	0.859941	0.395005	Yes
R-HSA-5685942	HDR through Homologous Recombination (HRR)	-0.812644	0.0413833	-0.748676	0.0555899	8.86107e-15	-0.857296	-0.393979	Yes
R-HSA-2160916	Hyaluronan uptake and degradation	0.6156	0.118175	0.494802	0.11793	9.04485e-15	0.85688	0.393817	Yes
R-HSA-68877	Mitotic Prometaphase	-0.78892	0.0625914	-0.715327	0.0774387	9.22525e-15	-0.856517	-0.393676	Yes
R-HSA-416572	Sema4D induced cell migration and growth-cone collapse	0.868931	0.0308631	0.839386	0.0277688	9.99891e-15	0.855199	0.393164	Yes
R-HSA-140875	Common Pathway of Fibrin Clot Formation	-0.661894	0.0812743	-0.722035	0.0468227	2.27926e-14	0.841337	0.387756	Yes
R-HSA-5668914	Diseases of metabolism	-0.264178	0.424193	-0.575068	0.105662	2.39412e-14	0.840534	0.387442	Yes
R-HSA-975634	Retinoid metabolism and transport	-0.669079	0.0765442	-0.737557	0.0572906	2.42327e-14	0.840171	0.387299	Yes
R-HSA-159227	Transport of the SLBP independent Mature mRNA	0.526812	0.10944	0.621567	0.0710769	2.65123e-14	-0.838733	-0.386736	Yes
R-HSA-77595	Processing of Intronless Pre-mRNAs	0.615008	0.110832	0.711959	0.0599584	5.17326e-14	-0.82731	-0.382243	Yes
R-HSA-975163	IRAK2 mediated activation of TAK1 complex upon TLR7/8 or 9 stimulation	0.855091	0.0578172	0.789736	0.0549618	5.25504e-14	0.826886	0.382075	Yes
R-HSA-416700	Other semaphorin interactions	0.802684	0.062255	0.739129	0.0639673	5.3101e-14	0.826718	0.382009	Yes
R-HSA-5083635	Defective B3GALTL causes Peters-plus syndrome (PpS)	-0.905353	0.031272	-0.936089	0.026587	5.39806e-14	0.826477	0.381914	Yes
R-HSA-159230	Transport of the SLBP Dependant Mature mRNA	0.510165	0.120492	0.615123	0.0745829	5.94682e-14	-0.824842	-0.381268	Yes
R-HSA-937072	TRAF6-mediated induction of TAK1 complex within TLR4 complex	0.855401	0.0579068	0.791283	0.0543305	6.0031e-14	0.824518	0.381141	Yes
R-HSA-879415	Advanced glycosylation endproduct receptor signaling	0.913353	0.0274856	0.873523	0.0349303	6.05197e-14	0.824339	0.38107	Yes
R-HSA-1433559	Regulation of KIT signaling	0.865843	0.0363405	0.894679	0.0254109	6.79328e-14	-0.822392	-0.3803	Yes
R-HSA-5655253	Signaling by FGFR2 in disease	0.114081	0.495615	0.500007	0.181449	1.04556e-13	-0.815044	-0.377388	Yes
R-HSA-8956321	Nucleotide salvage	-0.836818	0.0477071	-0.88034	0.0344969	1.11253e-13	0.813866	0.37692	Yes
R-HSA-177243	Interactions of Rev with host cellular proteins	0.812051	0.0494001	0.854113	0.0389895	1.18701e-13	-0.812721	-0.376465	Yes
R-HSA-176033	Interactions of Vpr with host cellular proteins	0.701174	0.0826222	0.775008	0.058007	1.22639e-13	-0.812069	-0.376206	Yes
R-HSA-5666185	RHO GTPases Activate Rhotekin and Rhophilins	0.772855	0.0539836	0.707887	0.0493703	1.6807e-13	0.806391	0.373944	Yes
R-HSA-163125	Post-translational modification: synthesis of GPI-anchored proteins	-0.698728	0.0829346	-0.781421	0.056306	1.78042e-13	0.80553	0.373601	Yes
R-HSA-114608	Platelet degranulation	0.786681	0.0650833	0.722158	0.0610805	1.79784e-13	0.805108	0.373432	Yes
R-HSA-15869	Metabolism of nucleotides	-0.853606	0.0437873	-0.899071	0.0323295	1.81755e-13	0.804993	0.373386	Yes
R-HSA-170822	Regulation of Glucokinase by Glucokinase Regulatory Protein	0.584529	0.08334	0.654509	0.0612928	1.99182e-13	-0.803316	-0.372717	Yes
R-HSA-5619107	Defective TPR may confer susceptibility towards thyroid papillary carcinoma (TPC)	0.584529	0.08334	0.654509	0.0612928	1.99182e-13	-0.803316	-0.372717	Yes
R-HSA-72203	Processing of Capped Intron-Containing Pre-mRNA	0.791286	0.064683	0.845963	0.0418561	1.99292e-13	-0.803281	-0.372703	Yes
R-HSA-5173214	O-glycosylation of TSR domain-containing proteins	-0.906826	0.031185	-0.936727	0.0267502	2.24085e-13	0.801283	0.371904	Yes
R-HSA-4615885	SUMOylation of DNA replication proteins	0.557796	0.101242	0.639949	0.0615057	2.34294e-13	-0.800538	-0.371606	Yes
R-HSA-211945	Phase I - Functionalization of compounds	-0.749027	0.0706604	-0.819354	0.0437835	2.47559e-13	0.799485	0.371184	Yes
R-HSA-168333	NEP/NS2 Interacts with the Cellular Export Machinery	0.723708	0.0604073	0.77574	0.0469903	2.92003e-13	-0.796627	-0.37004	Yes
R-HSA-68962	Activation of the pre-replicative complex	-0.896798	0.0341991	-0.852141	0.0397715	3.75218e-13	-0.792313	-0.368308	Yes
R-HSA-3928665	EPH-ephrin mediated repulsion of cells	0.782015	0.0537755	0.700472	0.0602397	6.05303e-13	0.783904	0.364922	Yes
R-HSA-3371453	Regulation of HSF1-mediated heat shock response	0.768482	0.0499206	0.821164	0.042937	6.20103e-13	-0.783524	-0.364769	Yes
R-HSA-3906995	Diseases associated with O-glycosylation of proteins	-0.875212	0.0359512	-0.909756	0.028545	6.32385e-13	0.78317	0.364626	Yes
R-HSA-446193	Biosynthesis of the N-glycan precursor (dolichol lipid-linked oligosaccharide, LLO) and transfer to a nascent protein	-0.826258	0.05847	-0.877559	0.0434062	6.94708e-13	0.781431	0.363924	Yes
R-HSA-5357956	TNFR1-induced NFkappaB signaling pathway	0.847211	0.0411983	0.883025	0.028613	1.03554e-12	-0.774432	-0.361091	Yes
R-HSA-165054	Rev-mediated nuclear export of HIV RNA	0.650139	0.0799906	0.716636	0.0573585	1.07686e-12	-0.773763	-0.36082	Yes
R-HSA-180746	Nuclear import of Rev protein	0.804857	0.0537117	0.851466	0.040558	1.19958e-12	-0.771762	-0.360007	Yes
R-HSA-3214841	PKMTs methylate histone lysines	0.472337	0.103996	0.558413	0.0730721	1.43707e-12	-0.768638	-0.358738	Yes
R-HSA-400685	Sema4D in semaphorin signaling	0.858997	0.0333101	0.824312	0.0317549	1.93933e-12	0.763332	0.356578	Yes
R-HSA-202670	ERKs are inactivated	0.844126	0.0480706	0.788188	0.0392268	2.16004e-12	0.761394	0.355787	Yes
R-HSA-6806667	Metabolism of fat-soluble vitamins	-0.668946	0.0756069	-0.734629	0.0575773	3.29079e-12	0.753972	0.352752	Yes
R-HSA-3214858	RMTs methylate histone arginines	0.154904	0.432595	0.493616	0.153444	3.85248e-12	-0.751279	-0.351648	Yes
R-HSA-76005	Response to elevated platelet cytosolic Ca2+	0.783434	0.0630382	0.71843	0.0624874	3.85248e-12	0.75114	0.351591	Yes
R-HSA-168325	Viral Messenger RNA Synthesis	0.199075	0.415665	0.534587	0.110634	5.27077e-12	-0.745894	-0.349436	Yes
R-HSA-3299685	Detoxification of Reactive Oxygen Species	0.658358	0.0510721	0.598622	0.05891	9.5203e-12	0.735303	0.345069	Yes
R-HSA-6805567	Keratinization	-0.826474	0.0590389	-0.888724	0.0521867	1.08153e-11	0.733068	0.344145	Yes
R-HSA-6809371	Formation of the cornified envelope	-0.826474	0.0590389	-0.888724	0.0521867	1.08153e-11	0.733068	0.344145	Yes
R-HSA-901032	ER Quality Control Compartment (ERQC)	0.804126	0.0649586	0.856775	0.0461563	1.33235e-11	-0.729147	-0.34252	Yes
R-HSA-3371556	Cellular response to heat stress	0.771966	0.0520823	0.825729	0.0422945	1.34515e-11	-0.728976	-0.342449	Yes
R-HSA-2022928	HS-GAG biosynthesis	-0.798647	0.0732131	-0.877955	0.0346487	4.9844e-11	0.705383	0.332611	Yes
R-HSA-5625970	RHO GTPases activate KTN1	0.841305	0.0412685	0.792394	0.0475821	1.05875e-10	0.691627	0.326823	Yes
R-HSA-71336	Pentose phosphate pathway	0.824611	0.0446623	0.756996	0.0558317	1.76625e-10	0.682284	0.322872	Yes
R-HSA-2022377	Metabolism of Angiotensinogen to Angiotensins	0.827757	0.0505309	0.745754	0.0475615	1.78392e-10	0.68205	0.322772	Yes
R-HSA-1592389	Activation of Matrix Metalloproteinases	-0.185214	0.436694	-0.547396	0.101163	1.79387e-10	0.681947	0.322729	Yes
R-HSA-159231	Transport of Mature mRNA Derived from an Intronless Transcript	0.0584167	0.430076	0.429292	0.17342	2.53802e-10	-0.675634	-0.320048	Yes
R-HSA-5668599	RHO GTPases Activate NADPH Oxidases	0.80341	0.0523077	0.735694	0.0664544	2.62556e-10	0.674863	0.31972	Yes
R-HSA-5685938	HDR through Single Strand Annealing (SSA)	-0.779788	0.0393879	-0.721624	0.0523453	2.62556e-10	-0.674811	-0.319698	Yes
R-HSA-5693616	Presynaptic phase of homologous DNA pairing and strand exchange	-0.763557	0.0381186	-0.707692	0.0511983	2.64911e-09	-0.631383	-0.301046	Yes
R-HSA-1679131	Trafficking and processing of endosomal TLR	0.805769	0.0497321	0.755845	0.0530987	7.14902e-36	1.65771	0.638148	No
R-HSA-112310	Neurotransmitter release cycle	-0.372616	0.27197	-0.215114	0.347846	8.10051e-36	-1.65456	-0.637428	No
R-HSA-111932	CaMK IV-mediated phosphorylation of CREB	0.744052	0.0573691	0.784592	0.0569113	7.53619e-34	-1.57608	-0.618951	No
R-HSA-3000157	Laminin interactions	-0.80349	0.0567862	-0.770745	0.0502572	2.5453e-33	-1.55401	-0.613559	No
R-HSA-111996	Ca-dependent events	0.871631	0.0346594	0.897729	0.0284682	1.15286e-32	-1.52792	-0.607076	No
R-HSA-442729	CREB1 phosphorylation through the activation of CaMKII/CaMKK/CaMKIV cascasde	0.745639	0.0601976	0.783435	0.0567833	1.54149e-32	-1.52277	-0.605781	No
R-HSA-9614085	FOXO-mediated transcription	0.915104	0.0244488	0.934082	0.0197401	4.64319e-32	-1.50287	-0.600735	No
R-HSA-9614399	Regulation of localization of FOXO transcription factors	0.879962	0.0297989	0.894296	0.0321866	1.06336e-30	-1.45398	-0.588023	No
R-HSA-111933	Calmodulin induced events	0.848176	0.0405466	0.878193	0.0338132	1.15554e-30	-1.4515	-0.587365	No
R-HSA-111997	CaM pathway	0.848176	0.0405466	0.878193	0.0338132	1.15554e-30	-1.4515	-0.587365	No
R-HSA-2219528	PI3K/AKT Signaling in Cancer	0.844147	0.031793	0.860144	0.0290481	4.51187e-30	-1.42969	-0.581539	No
R-HSA-9634638	Estrogen-dependent nuclear events downstream of ESR-membrane signaling	0.898141	0.0235069	0.905518	0.022916	3.03197e-29	-1.39925	-0.573257	No
R-HSA-1489509	DAG and IP3 signaling	0.818813	0.0466131	0.856068	0.0363429	5.381e-29	-1.39032	-0.570793	No
R-HSA-1181150	Signaling by NODAL	-0.308353	0.340532	-0.189998	0.402693	1.33147e-28	-1.37486	-0.56649	No
R-HSA-6804756	Regulation of TP53 Activity through Phosphorylation	-0.329274	0.343056	-0.0196109	0.418073	7.05756e-28	-1.34982	-0.559421	No
R-HSA-77289	Mitochondrial Fatty Acid Beta-Oxidation	-0.898433	0.0313275	-0.91225	0.0255695	1.42544e-27	1.33778	0.555979	No
R-HSA-201722	Formation of the beta-catenin:TCF transactivating complex	0.77699	0.0787237	0.808849	0.0645129	1.33996e-26	-1.3034	-0.54599	No
R-HSA-2173793	Transcriptional activity of SMAD2/SMAD3:SMAD4 heterotrimer	0.880447	0.0360167	0.908416	0.0280836	1.96603e-26	-1.29715	-0.544146	No
R-HSA-199418	Negative regulation of the PI3K/AKT network	0.796538	0.0431877	0.807952	0.0427281	2.30968e-26	-1.29443	-0.543343	No
R-HSA-4086398	Ca2+ pathway	0.826708	0.0396109	0.853453	0.0357233	2.99995e-26	-1.28999	-0.542028	No
R-HSA-5621481	C-type lectin receptors (CLRs)	0.759673	0.0416816	0.731377	0.042828	5.49722e-26	1.28056	0.53922	No
R-HSA-399719	Trafficking of AMPA receptors	0.72636	0.0797757	0.786676	0.059638	6.43981e-26	-1.27752	-0.538313	No
R-HSA-399721	Glutamate binding, activation of AMPA receptors and synaptic plasticity	0.72636	0.0797757	0.786676	0.059638	6.43981e-26	-1.27752	-0.538313	No
R-HSA-1502540	Signaling by Activin	-0.834595	0.0384475	-0.791672	0.0587193	6.89061e-26	-1.27588	-0.537821	No
R-HSA-8953750	Transcriptional Regulation by E2F6	-0.591657	0.0964798	-0.503518	0.121473	1.13635e-25	-1.26783	-0.535403	No
R-HSA-2206281	Mucopolysaccharidoses	0.778168	0.0670341	0.714883	0.0671638	1.17199e-25	1.26735	0.535259	No
R-HSA-112043	PLC beta mediated events	0.882965	0.0323578	0.903875	0.0263514	1.21452e-25	-1.26683	-0.535101	No
R-HSA-5357801	Programmed Cell Death	0.670113	0.0554871	0.622694	0.0485745	2.44026e-25	1.25523	0.531591	No
R-HSA-5654743	Signaling by FGFR4	0.875715	0.0358882	0.900775	0.0257078	5.11812e-25	-1.2437	-0.528074	No
R-HSA-199992	trans-Golgi Network Vesicle Budding	0.751453	0.0724457	0.713573	0.0694222	5.6583e-25	1.24161	0.527432	No
R-HSA-5654736	Signaling by FGFR1	0.875697	0.0360627	0.900908	0.0253933	8.66662e-25	-1.23493	-0.52538	No
R-HSA-8934593	Regulation of RUNX1 Expression and Activity	0.721246	0.0468381	0.760895	0.045783	1.42179e-24	-1.22705	-0.522946	No
R-HSA-933541	TRAF6 mediated IRF7 activation	0.77946	0.0400008	0.75205	0.0408644	1.73946e-24	1.22374	0.521921	No
R-HSA-5654741	Signaling by FGFR3	0.87693	0.0344709	0.901113	0.0253478	1.74247e-24	-1.22362	-0.521884	No
R-HSA-8853659	RET signaling	0.816945	0.0451586	0.842719	0.0358851	3.28768e-24	-1.21311	-0.518611	No
R-HSA-2514859	Inactivation, recovery and regulation of the phototransduction cascade	0.682753	0.105814	0.757879	0.0652373	4.09277e-24	-1.20969	-0.51754	No
R-HSA-111885	Opioid Signalling	0.895743	0.0333035	0.911735	0.0244403	7.60842e-24	-1.19976	-0.514419	No
R-HSA-112040	G-protein mediated events	0.880236	0.030708	0.903277	0.0239311	8.77586e-24	-1.19757	-0.513729	No
R-HSA-983169	Class I MHC mediated antigen processing & presentation	0.720007	0.0506639	0.671563	0.0598115	1.06112e-23	1.19427	0.512685	No
R-HSA-1234174	Cellular response to hypoxia	0.597432	0.0359009	0.566387	0.0434025	1.31602e-23	1.19081	0.511589	No
R-HSA-181429	Serotonin Neurotransmitter Release Cycle	-0.870333	0.0538375	-0.828113	0.0492496	1.89716e-23	-1.18515	-0.509791	No
R-HSA-6783783	Interleukin-10 signaling	0.798717	0.0686402	0.738006	0.0753475	2.12618e-23	1.18326	0.509189	No
R-HSA-912694	Regulation of IFNA signaling	0.781922	0.0317834	0.749621	0.0403532	2.12618e-23	1.18323	0.50918	No
R-HSA-73762	RNA Polymerase I Transcription Initiation	-0.824188	0.0480415	-0.78216	0.0451207	2.77452e-23	-1.17906	-0.50785	No
R-HSA-9013694	Signaling by NOTCH4	0.617241	0.0522482	0.574054	0.0494095	3.63216e-23	1.17449	0.506387	No
R-HSA-181430	Norepinephrine Neurotransmitter Release Cycle	-0.869605	0.0540349	-0.827844	0.0487769	3.7767e-23	-1.17361	-0.506105	No
R-HSA-197264	Nicotinamide salvaging	0.871737	0.0270169	0.859557	0.0317192	5.628e-23	1.16741	0.504109	No
R-HSA-68875	Mitotic Prophase	0.747156	0.0599998	0.792151	0.0441876	7.19873e-23	-1.1637	-0.502913	No
R-HSA-73863	RNA Polymerase I Transcription Termination	-0.924985	0.0251736	-0.913295	0.0215311	7.98956e-23	-1.16177	-0.502292	No
R-HSA-5223345	Miscellaneous transport and binding events	-0.505594	0.116379	-0.319523	0.304217	8.38123e-23	-1.16116	-0.502094	No
R-HSA-110314	Recognition of DNA damage by PCNA-containing replication complex	0.749802	0.0478788	0.792184	0.0500026	1.20676e-22	-1.15528	-0.500189	No
R-HSA-2514856	The phototransduction cascade	0.772061	0.0774626	0.826941	0.0529899	1.38912e-22	-1.15295	-0.499431	No
R-HSA-1482839	Acyl chain remodelling of PE	-0.817189	0.0536689	-0.860149	0.0389284	1.69518e-22	1.14965	0.498356	No
R-HSA-8854691	Interleukin-20 family signaling	0.77117	0.0348852	0.730686	0.0450799	1.89959e-22	1.14762	0.497696	No
R-HSA-438064	Post NMDA receptor activation events	0.801247	0.0582656	0.810778	0.0432756	2.25968e-22	-1.145	-0.49684	No
R-HSA-4641265	Repression of WNT target genes	0.842261	0.0512254	0.861817	0.0400219	2.46657e-22	-1.14347	-0.496338	No
R-HSA-196807	Nicotinate metabolism	0.815044	0.0333012	0.787453	0.0353446	3.95557e-22	1.13601	0.493892	No
R-HSA-442755	Activation of NMDA receptors and postsynaptic events	0.822735	0.0508349	0.834533	0.0421352	5.01746e-22	-1.13233	-0.492682	No
R-HSA-9006936	Signaling by TGF-beta family members	0.899646	0.0232799	0.918734	0.0201906	7.46535e-22	-1.12611	-0.49063	No
R-HSA-8852135	Protein ubiquitination	0.748537	0.062952	0.77057	0.0553242	9.6371e-22	-1.12213	-0.489312	No
R-HSA-442742	CREB1 phosphorylation through NMDA receptor-mediated activation of RAS signaling	0.919821	0.0246522	0.933713	0.0202971	1.27909e-21	-1.11778	-0.487867	No
R-HSA-196849	Metabolism of water-soluble vitamins and cofactors	-0.717881	0.0451335	-0.75649	0.0389708	1.28276e-21	1.1176	0.487807	No
R-HSA-1855183	Synthesis of IP2, IP, and Ins in the cytosol	-0.823167	0.0512149	-0.776805	0.0558335	2.15419e-21	-1.10892	-0.484912	No
R-HSA-6811558	PI5P, PP2A and IER3 Regulate PI3K/AKT Signaling	0.792833	0.0485168	0.803236	0.0499774	2.18514e-21	-1.10877	-0.484861	No
R-HSA-9027284	Erythropoietin activates RAS	0.870843	0.0243425	0.857502	0.0240304	4.04851e-21	1.09906	0.481601	No
R-HSA-1643713	Signaling by EGFR in Cancer	0.888207	0.033875	0.91451	0.0268812	5.26406e-21	-1.09509	-0.480265	No
R-HSA-1236382	Constitutive Signaling by Ligand-Responsive EGFR Cancer Variants	0.884716	0.0336915	0.913006	0.02822	5.42884e-21	-1.09445	-0.48005	No
R-HSA-5637815	Signaling by Ligand-Responsive EGFR Variants in Cancer	0.884716	0.0336915	0.913006	0.02822	5.42884e-21	-1.09445	-0.48005	No
R-HSA-2173789	TGF-beta receptor signaling activates SMADs	0.850687	0.0363781	0.876897	0.0309587	7.21292e-21	-1.08976	-0.478464	No
R-HSA-5619084	ABC transporter disorders	0.595648	0.0446153	0.561781	0.0437179	1.02611e-20	1.08427	0.4766	No
R-HSA-918233	TRAF3-dependent IRF activation pathway	0.80532	0.034466	0.778614	0.0355527	1.35583e-20	1.07994	0.475127	No
R-HSA-450531	Regulation of mRNA stability by proteins that bind AU-rich elements	0.614702	0.0504144	0.572364	0.0550938	1.61232e-20	1.07706	0.474145	No
R-HSA-432720	Lysosome Vesicle Biogenesis	0.710305	0.0692085	0.676938	0.0629514	1.84547e-20	1.07478	0.47337	No
R-HSA-5696398	Nucleotide Excision Repair	-0.366783	0.317896	-0.150541	0.405461	2.30029e-20	-1.07156	-0.472265	No
R-HSA-1483191	Synthesis of PC	0.726814	0.0890628	0.763546	0.0702272	2.84639e-20	-1.06801	-0.471049	No
R-HSA-5621480	Dectin-2 family	0.833021	0.0538693	0.77778	0.0579737	3.00192e-20	1.06705	0.470718	No
R-HSA-5696394	DNA Damage Recognition in GG-NER	0.764358	0.0459563	0.800641	0.0382114	3.2825e-20	-1.06561	-0.470225	No
R-HSA-210500	Glutamate Neurotransmitter Release Cycle	0.0183479	0.421003	0.291399	0.339472	4.73955e-20	-1.05994	-0.468274	No
R-HSA-5696400	Dual Incision in GG-NER	0.672491	0.0617555	0.723547	0.0590335	6.03818e-20	-1.05592	-0.466885	No
R-HSA-933543	NF-kB activation through FADD/RIP-1 pathway mediated by caspase-8 and -10	0.75107	0.0418518	0.725386	0.0406354	6.05226e-20	1.05576	0.466831	No
R-HSA-69618	Mitotic Spindle Checkpoint	-0.827465	0.0732795	-0.759661	0.0827177	8.13842e-20	-1.051	-0.465179	No
R-HSA-3371378	Regulation by c-FLIP	0.79392	0.0545256	0.766829	0.0559741	8.7649e-20	1.04958	0.464689	No
R-HSA-5218900	CASP8 activity is inhibited	0.79392	0.0545256	0.766829	0.0559741	8.7649e-20	1.04958	0.464689	No
R-HSA-69416	Dimerization of procaspase-8	0.79392	0.0545256	0.766829	0.0559741	8.7649e-20	1.04958	0.464689	No
R-HSA-176407	Conversion from APC/C:Cdc20 to APC/C:Cdh1 in late anaphase	-0.844706	0.0459886	-0.826385	0.0367004	1.0405e-19	-1.04683	-0.463733	No
R-HSA-180024	DARPP-32 events	0.7707	0.0423663	0.79943	0.0330433	1.17587e-19	-1.04464	-0.46297	No
R-HSA-179409	APC-Cdc20 mediated degradation of Nek2A	0.703139	0.0641256	0.732805	0.0514548	1.3598e-19	-1.04238	-0.462183	No
R-HSA-3296469	Defects in cobalamin (B12) metabolism	-0.789445	0.046443	-0.747443	0.0535538	1.45484e-19	-1.04104	-0.461714	No
R-HSA-2428924	IGF1R signaling cascade	0.58694	0.0685244	0.620298	0.0504731	1.58546e-19	-1.0398	-0.461284	No
R-HSA-5693565	Recruitment and ATM-mediated phosphorylation of repair and signaling proteins at DNA double strand breaks	0.775575	0.0607074	0.822407	0.050063	2.58213e-19	-1.03207	-0.458576	No
R-HSA-5693606	DNA Double Strand Break Response	0.773397	0.0617149	0.820841	0.0510628	2.58213e-19	-1.03213	-0.458598	No
R-HSA-9034015	Signaling by NTRK3 (TRKC)	0.615994	0.100484	0.690313	0.0674769	2.61581e-19	-1.03184	-0.458495	No
R-HSA-5655291	Signaling by FGFR4 in disease	0.795892	0.0471556	0.832369	0.0372521	3.57005e-19	-1.02683	-0.456734	No
R-HSA-5655332	Signaling by FGFR3 in disease	0.754585	0.0525471	0.79513	0.0408664	3.57005e-19	-1.02684	-0.45674	No
R-HSA-8853338	Signaling by FGFR3 point mutants in cancer	0.754585	0.0525471	0.79513	0.0408664	3.57005e-19	-1.02684	-0.45674	No
R-HSA-9022699	MECP2 regulates neuronal receptors and channels	0.856541	0.0347463	0.881429	0.0315663	3.77148e-19	-1.02591	-0.456412	No
R-HSA-427389	ERCC6 (CSB) and EHMT2 (G9a) positively regulate rRNA expression	0.703008	0.0708417	0.736152	0.0643055	5.22037e-19	-1.02069	-0.454572	No
R-HSA-442720	CREB1 phosphorylation through the activation of Adenylate Cyclase	0.841339	0.0490583	0.864798	0.0351604	5.22037e-19	-1.02079	-0.454605	No
R-HSA-8868766	rRNA processing in the mitochondrion	0.587583	0.0698737	0.640983	0.0554943	5.82394e-19	-1.01898	-0.453964	No
R-HSA-1660499	Synthesis of PIPs at the plasma membrane	0.854659	0.0314416	0.879277	0.0300957	5.94823e-19	-1.01853	-0.453805	No
R-HSA-9006115	Signaling by NTRK2 (TRKB)	0.83199	0.0558739	0.876598	0.0413828	6.40082e-19	-1.01744	-0.45342	No
R-HSA-373752	Netrin-1 signaling	0.803268	0.0520306	0.840237	0.045506	6.93442e-19	-1.01611	-0.45295	No
R-HSA-5218921	VEGFR2 mediated cell proliferation	0.814883	0.0460153	0.849159	0.0337368	7.07242e-19	-1.01571	-0.452807	No
R-HSA-3781860	Diseases associated with N-glycosylation of proteins	-0.847655	0.0380847	-0.819329	0.0454835	7.36284e-19	-1.01484	-0.452501	No
R-HSA-418885	DCC mediated attractive signaling	0.799263	0.0683224	0.850386	0.0496187	7.709e-19	-1.01425	-0.452292	No
R-HSA-1483255	PI Metabolism	0.72204	0.0562238	0.76713	0.0448521	8.96486e-19	-1.0116	-0.451349	No
R-HSA-6782210	Gap-filling DNA repair synthesis and ligation in TC-NER	0.590057	0.112334	0.672168	0.0679011	9.00727e-19	-1.01152	-0.451321	No
R-HSA-429947	Deadenylation of mRNA	0.82103	0.0558233	0.867642	0.0437644	1.00853e-18	-1.00971	-0.450677	No
R-HSA-6782135	Dual incision in TC-NER	0.593352	0.111654	0.675041	0.0704317	1.03974e-18	-1.00917	-0.450484	No
R-HSA-186712	Regulation of beta-cell development	0.794502	0.0340637	0.80287	0.0303851	1.05258e-18	-1.00885	-0.450372	No
R-HSA-2428928	IRS-related events triggered by IGF1R	0.593821	0.0680564	0.627789	0.0474425	1.28938e-18	-1.00567	-0.449239	No
R-HSA-3296482	Defects in vitamin and cofactor metabolism	-0.807665	0.0417588	-0.764803	0.0498499	1.69845e-18	-1.00112	-0.447616	No
R-HSA-1234176	Oxygen-dependent proline hydroxylation of Hypoxia-inducible Factor Alpha	0.594534	0.0358469	0.565563	0.04353	1.7044e-18	1.00103	0.447581	No
R-HSA-2404192	Signaling by Type 1 Insulin-like Growth Factor 1 Receptor (IGF1R)	0.552749	0.0776196	0.590867	0.0556189	1.79393e-18	-1.00027	-0.447312	No
R-HSA-6781823	Formation of TC-NER Pre-Incision Complex	0.797774	0.0562	0.833518	0.0404756	2.25429e-18	-0.996546	-0.445976	No
R-HSA-432722	Golgi Associated Vesicle Biogenesis	0.754547	0.0813109	0.738729	0.0635498	2.85595e-18	0.99255	0.444542	No
R-HSA-452723	Transcriptional regulation of pluripotent stem cells	-0.59316	0.0723571	-0.565478	0.0781579	2.9117e-18	-0.992131	-0.444392	No
R-HSA-351202	Metabolism of polyamines	0.582209	0.0501903	0.542529	0.0525358	3.37418e-18	0.989797	0.443552	No
R-HSA-1538133	G0 and Early G1	-0.681887	0.0631049	-0.647975	0.0619037	5.32351e-18	-0.98236	-0.440869	No
R-HSA-8862803	Deregulated CDK5 triggers multiple neurodegenerative pathways in Alzheimer's disease models	0.793917	0.0578291	0.751173	0.055066	6.34459e-18	0.979627	0.43988	No
R-HSA-8863678	Neurodegenerative Diseases	0.793917	0.0578291	0.751173	0.055066	6.34459e-18	0.979627	0.43988	No
R-HSA-69273	Cyclin A/B1/B2 associated events during G2/M transition	-0.842828	0.0570535	-0.802047	0.0552474	7.12469e-18	-0.977776	-0.43921	No
R-HSA-5654687	Downstream signaling of activated FGFR1	0.600721	0.0859317	0.664649	0.0632229	7.82096e-18	-0.97625	-0.438656	No
R-HSA-5654696	Downstream signaling of activated FGFR2	0.657318	0.0708622	0.710782	0.0545811	7.88715e-18	-0.976053	-0.438585	No
R-HSA-5654708	Downstream signaling of activated FGFR3	0.706179	0.0612976	0.752676	0.0486512	7.90465e-18	-0.975893	-0.438527	No
R-HSA-5654716	Downstream signaling of activated FGFR4	0.706179	0.0612976	0.752676	0.0486512	7.90465e-18	-0.975893	-0.438527	No
R-HSA-1971475	A tetrasaccharide linker sequence is required for GAG synthesis	-0.660249	0.0567222	-0.676922	0.0649354	8.85236e-18	0.973873	0.437793	No
R-HSA-1266738	Developmental Biology	0.904491	0.036952	0.909458	0.0333733	9.59065e-18	-0.97256	-0.437315	No
R-HSA-5678895	Defective CFTR causes cystic fibrosis	0.596735	0.0456599	0.563709	0.0473023	9.91432e-18	0.971853	0.437058	No
R-HSA-1227986	Signaling by ERBB2	0.902183	0.0286801	0.922849	0.0244541	1.04114e-17	-0.971087	-0.43678	No
R-HSA-8941326	RUNX2 regulates bone development	-0.839002	0.0324665	-0.816785	0.0346223	1.04114e-17	-0.970959	-0.436733	No
R-HSA-110320	Translesion Synthesis by POLH	0.753585	0.0683388	0.805607	0.0480876	1.07498e-17	-0.970452	-0.436549	No
R-HSA-5663213	RHO GTPases Activate WASPs and WAVEs	0.855	0.0443852	0.816267	0.0447191	1.09681e-17	0.969983	0.436378	No
R-HSA-350562	Regulation of ornithine decarboxylase (ODC)	0.583517	0.0470229	0.546748	0.0520608	1.13853e-17	0.96937	0.436155	No
R-HSA-2980766	Nuclear Envelope Breakdown	0.680503	0.0570641	0.722882	0.0451165	1.17268e-17	-0.968923	-0.435991	No
R-HSA-1482788	Acyl chain remodelling of PC	-0.617782	0.0966122	-0.67277	0.0679903	1.18709e-17	0.968711	0.435914	No
R-HSA-5637810	Constitutive Signaling by EGFRvIII	0.878118	0.0335571	0.90217	0.0286437	1.20593e-17	-0.968367	-0.435789	No
R-HSA-5637812	Signaling by EGFRvIII in Cancer	0.878118	0.0335571	0.90217	0.0286437	1.20593e-17	-0.968367	-0.435789	No
R-HSA-75105	Fatty acyl-CoA biosynthesis	-0.489477	0.151933	-0.548243	0.1185	1.25518e-17	0.967767	0.43557	No
R-HSA-936440	Negative regulators of DDX58/IFIH1 signaling	0.720961	0.068537	0.666624	0.0596143	1.25586e-17	0.967543	0.435489	No
R-HSA-177929	Signaling by EGFR	0.912136	0.0258768	0.927267	0.0224175	1.45221e-17	-0.965196	-0.434632	No
R-HSA-174048	APC/C:Cdc20 mediated degradation of Cyclin B	0.717535	0.0614112	0.740324	0.0483469	1.88276e-17	-0.961044	-0.433113	No
R-HSA-196741	Cobalamin (Cbl, vitamin B12) transport and metabolism	-0.776822	0.0448803	-0.733545	0.0522576	2.09252e-17	-0.959243	-0.432454	No
R-HSA-5362768	Hh mutants that don't undergo autocatalytic processing are degraded by ERAD	0.595297	0.0449768	0.562882	0.0487875	2.24959e-17	0.958086	0.432029	No
R-HSA-5387390	Hh mutants abrogate ligand secretion	0.595145	0.045009	0.56278	0.0488353	2.28202e-17	0.957805	0.431927	No
R-HSA-72702	Ribosomal scanning and start codon recognition	0.817515	0.0422396	0.836373	0.0333753	2.37242e-17	-0.957235	-0.431717	No
R-HSA-5358346	Hedgehog ligand biogenesis	0.597419	0.0464555	0.565017	0.0487943	2.42999e-17	0.956702	0.431522	No
R-HSA-2142845	Hyaluronan metabolism	0.0199813	0.471354	-0.28173	0.369346	2.53368e-17	0.956117	0.431307	No
R-HSA-72649	Translation initiation complex formation	0.818494	0.0421042	0.83671	0.0332264	3.09937e-17	-0.952776	-0.430079	No
R-HSA-72662	Activation of the mRNA upon binding of the cap-binding complex and eIFs, and subsequent binding to 43S	0.818452	0.0421067	0.836657	0.0332258	3.10144e-17	-0.95271	-0.430055	No
R-HSA-5632684	Hedgehog 'on' state	0.595393	0.0469644	0.560494	0.0471536	4.03502e-17	0.948307	0.428432	No
R-HSA-73894	DNA Repair	-0.838247	0.0553373	-0.785433	0.0688902	4.43879e-17	-0.946766	-0.427864	No
R-HSA-5696395	Formation of Incision Complex in GG-NER	0.727202	0.0525068	0.767108	0.0465067	4.76712e-17	-0.945633	-0.427445	No
R-HSA-5250913	Positive epigenetic regulation of rRNA expression	0.803672	0.0539379	0.828126	0.0490796	5.06201e-17	-0.94456	-0.427049	No
R-HSA-168273	Influenza Viral RNA Transcription and Replication	0.871384	0.0364582	0.886773	0.0284241	5.21945e-17	-0.944094	-0.426877	No
R-HSA-198725	Nuclear Events (kinase and transcription factor activation)	0.836678	0.0372835	0.803407	0.0340213	5.62583e-17	0.94264	0.426339	No
R-HSA-111931	PKA-mediated phosphorylation of CREB	0.859785	0.0443978	0.885421	0.0325707	5.91403e-17	-0.941941	-0.42608	No
R-HSA-73864	RNA Polymerase I Transcription	-0.931945	0.0241792	-0.919838	0.0255316	6.11343e-17	-0.941213	-0.42581	No
R-HSA-141405	Inhibition of the proteolytic activity of APC/C required for the onset of anaphase by mitotic spindle checkpoint components	-0.840992	0.0413677	-0.825761	0.0359907	6.35274e-17	-0.940556	-0.425567	No
R-HSA-141430	Inactivation of APC/C via direct inhibition of the APC/C complex	-0.840992	0.0413677	-0.825761	0.0359907	6.35274e-17	-0.940556	-0.425567	No
R-HSA-450408	AUF1 (hnRNP D0) binds and destabilizes mRNA	0.596201	0.0486914	0.560014	0.0535684	7.81538e-17	0.937275	0.424351	No
R-HSA-156842	Eukaryotic Translation Elongation	0.856268	0.0368601	0.86875	0.0294423	8.32835e-17	-0.936282	-0.423981	No
R-HSA-192823	Viral mRNA Translation	0.855517	0.0357634	0.867793	0.0282227	9.08862e-17	-0.934851	-0.42345	No
R-HSA-156902	Peptide chain elongation	0.855385	0.0366121	0.867744	0.029484	9.51478e-17	-0.934081	-0.423163	No
R-HSA-72764	Eukaryotic Translation Termination	0.850818	0.0365667	0.86326	0.0285492	1.12815e-16	-0.931348	-0.422146	No
R-HSA-8964315	G beta:gamma signalling through BTK	0.797054	0.0842313	0.755044	0.0685165	1.24367e-16	0.929557	0.421479	No
R-HSA-73854	RNA Polymerase I Promoter Clearance	-0.931512	0.0241572	-0.919594	0.0257037	1.26545e-16	-0.929153	-0.421328	No
R-HSA-170670	Adenylate cyclase inhibitory pathway	0.906684	0.0252795	0.915374	0.0190284	1.47803e-16	0.926423	0.420309	No
R-HSA-72312	rRNA processing	0.831765	0.0408868	0.849763	0.0326754	1.71773e-16	-0.924115	-0.419446	No
R-HSA-8868773	rRNA processing in the nucleus and cytosol	0.833242	0.0410237	0.851255	0.0326482	1.89379e-16	-0.922524	-0.418851	No
R-HSA-975956	Nonsense Mediated Decay (NMD) independent of the Exon Junction Complex (EJC)	0.859596	0.036309	0.870769	0.02951	1.91367e-16	-0.922307	-0.41877	No
R-HSA-174403	Glutathione synthesis and recycling	-0.837496	0.0648367	-0.871308	0.056337	1.92919e-16	0.922115	0.418698	No
R-HSA-72695	Formation of the ternary complex, and subsequently, the 43S complex	0.807836	0.0425564	0.82447	0.0343568	2.0364e-16	-0.921105	-0.41832	No
R-HSA-927802	Nonsense-Mediated Decay (NMD)	0.862891	0.0359627	0.875422	0.0296506	2.15902e-16	-0.920102	-0.417944	No
R-HSA-975957	Nonsense Mediated Decay (NMD) enhanced by the Exon Junction Complex (EJC)	0.862891	0.0359627	0.875422	0.0296506	2.15902e-16	-0.920102	-0.417944	No
R-HSA-75876	Synthesis of very long-chain fatty acyl-CoAs	0.728121	0.0695816	0.703771	0.0645058	2.18588e-16	0.919705	0.417795	No
R-HSA-198323	AKT phosphorylates targets in the cytosol	0.69388	0.0690345	0.705738	0.0508349	2.23986e-16	-0.919315	-0.417649	No
R-HSA-168255	Influenza Life Cycle	0.871654	0.0362287	0.886219	0.0290871	2.29551e-16	-0.918942	-0.417509	No
R-HSA-1236978	Cross-presentation of soluble exogenous antigens (endosomes)	0.106424	0.334263	-0.0741108	0.335802	2.35544e-16	0.918225	0.41724	No
R-HSA-5689896	Ovarian tumor domain proteases	0.734397	0.0613238	0.67673	0.0696349	2.42536e-16	0.917884	0.417112	No
R-HSA-2559584	Formation of Senescence-Associated Heterochromatin Foci (SAHF)	0.055678	0.46093	-0.25541	0.372594	2.47019e-16	0.917657	0.417027	No
R-HSA-8978934	Metabolism of cofactors	-0.785522	0.0586032	-0.805138	0.0487988	2.61629e-16	0.916625	0.416639	No
R-HSA-6791226	Major pathway of rRNA processing in the nucleolus and cytosol	0.846977	0.0392997	0.863431	0.0314438	2.878e-16	-0.915085	-0.41606	No
R-HSA-9604323	Negative regulation of NOTCH4 signaling	0.590949	0.0465036	0.555603	0.0494979	3.09888e-16	0.913743	0.415556	No
R-HSA-4641257	Degradation of AXIN	0.574915	0.0499742	0.543699	0.0547643	3.22102e-16	0.913101	0.415314	No
R-HSA-389513	CTLA4 inhibitory signaling	0.753121	0.0734806	0.794242	0.0669358	3.32761e-16	-0.91263	-0.415137	No
R-HSA-167172	Transcription of the HIV genome	-0.916043	0.0385713	-0.887325	0.032565	4.66124e-16	-0.907018	-0.41302	No
R-HSA-3928662	EPHB-mediated forward signaling	0.919211	0.0220405	0.901746	0.0209008	4.72113e-16	0.906722	0.412909	No
R-HSA-8866652	Synthesis of active ubiquitin: roles of E1 and E2 enzymes	0.784124	0.0540135	0.797058	0.0533539	5.35414e-16	-0.904764	-0.412169	No
R-HSA-156590	Glutathione conjugation	-0.91692	0.0265786	-0.930751	0.0211559	5.40047e-16	0.9046	0.412107	No
R-HSA-4655427	SUMOylation of DNA methylation proteins	-0.654354	0.0737098	-0.582216	0.0838462	5.82845e-16	-0.903095	-0.411537	No
R-HSA-2408557	Selenocysteine synthesis	0.851124	0.0364429	0.864092	0.0289271	6.13395e-16	-0.902517	-0.411318	No
R-HSA-72706	GTP hydrolysis and joining of the 60S ribosomal subunit	0.849027	0.0378904	0.862357	0.0305461	7.56861e-16	-0.899082	-0.410017	No
R-HSA-72613	Eukaryotic Translation Initiation	0.848688	0.0379973	0.862162	0.0306973	8.01253e-16	-0.898083	-0.409637	No
R-HSA-72737	Cap-dependent Translation Initiation	0.848688	0.0379973	0.862162	0.0306973	8.01253e-16	-0.898083	-0.409637	No
R-HSA-156827	L13a-mediated translational silencing of Ceruloplasmin expression	0.850973	0.0377692	0.863801	0.0308113	8.03698e-16	-0.897989	-0.409602	No
R-HSA-5358606	Mismatch repair (MMR) directed by MSH2:MSH3 (MutSbeta)	-0.882694	0.0380929	-0.842968	0.0416995	8.62889e-16	-0.89669	-0.409108	No
R-HSA-168927	TICAM1, RIP1-mediated IKK complex recruitment	0.783671	0.0716324	0.805431	0.0515625	8.7113e-16	-0.896567	-0.409062	No
R-HSA-211733	Regulation of activated PAK-2p34 by proteasome mediated degradation	0.583052	0.0467087	0.54968	0.0513676	9.52628e-16	0.894985	0.40846	No
R-HSA-449147	Signaling by Interleukins	0.814197	0.0561016	0.761756	0.0595307	1.25569e-15	0.890472	0.406742	No
R-HSA-8852276	The role of GTSE1 in G2/M progression after G2 checkpoint	0.598991	0.0502382	0.5659	0.0494797	1.53579e-15	0.887163	0.40548	No
R-HSA-72689	Formation of a pool of free 40S subunits	0.846884	0.0378942	0.858997	0.0311235	1.89507e-15	-0.883855	-0.404215	No
R-HSA-180585	Vif-mediated degradation of APOBEC3G	0.571944	0.0473217	0.539943	0.0530571	1.93679e-15	0.883312	0.404007	No
R-HSA-75815	Ubiquitin-dependent degradation of Cyclin D	0.582544	0.0473956	0.54851	0.0504527	2.00122e-15	0.882733	0.403786	No
R-HSA-2408522	Selenoamino acid metabolism	0.850836	0.0365696	0.863001	0.0302008	2.06756e-15	-0.882286	-0.403615	No
R-HSA-5628897	TP53 Regulates Metabolic Genes	0.668536	0.031418	0.669227	0.0355032	2.14695e-15	-0.881557	-0.403335	No
R-HSA-68827	CDT1 association with the CDC6:ORC:origin complex	0.583407	0.0469192	0.550612	0.0515407	2.27613e-15	0.880504	0.402932	No
R-HSA-169911	Regulation of Apoptosis	0.583671	0.0467094	0.549987	0.0512805	2.50498e-15	0.87893	0.402328	No
R-HSA-74751	Insulin receptor signalling cascade	0.616308	0.0613971	0.640635	0.0462163	2.53496e-15	-0.878759	-0.402263	No
R-HSA-937042	IRAK2 mediated activation of TAK1 complex	0.853406	0.0350672	0.87694	0.0341234	2.58149e-15	-0.878391	-0.402121	No
R-HSA-1650814	Collagen biosynthesis and modifying enzymes	-0.896865	0.0377164	-0.914672	0.0289029	2.60994e-15	0.878192	0.402045	No
R-HSA-3214847	HATs acetylate histones	-0.132239	0.447389	0.106365	0.404624	2.7625e-15	-0.877037	-0.401602	No
R-HSA-168254	Influenza Infection	0.866821	0.0373659	0.88025	0.0290094	2.78955e-15	-0.877096	-0.401624	No
R-HSA-9020933	Interleukin-23 signaling	0.785693	0.0472535	0.747557	0.0498403	3.17312e-15	0.874883	0.400774	No
R-HSA-1169408	ISG15 antiviral mechanism	0.795015	0.056515	0.753531	0.0493096	3.43199e-15	0.873638	0.400295	No
R-HSA-9014325	TICAM1,TRAF6-dependent induction of TAK1 complex	0.853962	0.0352091	0.876468	0.0346553	3.51119e-15	-0.873199	-0.400126	No
R-HSA-69601	Ubiquitin Mediated Degradation of Phosphorylated Cdc25A	0.582851	0.0467186	0.54912	0.0521815	3.58958e-15	0.87268	0.399926	No
R-HSA-69610	p53-Independent DNA Damage Response	0.582851	0.0467186	0.54912	0.0521815	3.58958e-15	0.87268	0.399926	No
R-HSA-69613	p53-Independent G1/S DNA damage checkpoint	0.582851	0.0467186	0.54912	0.0521815	3.58958e-15	0.87268	0.399926	No
R-HSA-1170546	Prolactin receptor signaling	0.764224	0.0552425	0.749328	0.0573302	3.97675e-15	0.870915	0.399246	No
R-HSA-5358351	Signaling by Hedgehog	0.607302	0.049582	0.579867	0.0469527	3.98504e-15	0.870808	0.399205	No
R-HSA-4641258	Degradation of DVL	0.585813	0.0470032	0.551766	0.051651	4.12094e-15	0.870242	0.398987	No
R-HSA-5619115	Disorders of transmembrane transporters	0.627292	0.0472615	0.593371	0.0543517	4.86933e-15	0.867439	0.397906	No
R-HSA-162587	HIV Life Cycle	0.735575	0.0743623	0.7918	0.0581412	5.48891e-15	-0.865516	-0.397163	No
R-HSA-2024096	HS-GAG degradation	-0.825016	0.0712139	-0.839159	0.0439128	5.82688e-15	0.864516	0.396776	No
R-HSA-212676	Dopamine Neurotransmitter Release Cycle	-0.85293	0.0371427	-0.845417	0.0390371	6.10378e-15	-0.863621	-0.39643	No
R-HSA-69183	Processive synthesis on the lagging strand	-0.896784	0.0311767	-0.866919	0.03541	6.15179e-15	-0.863436	-0.396359	No
R-HSA-198203	PI3K/AKT activation	0.667455	0.0581702	0.676595	0.0500102	6.15532e-15	-0.863481	-0.396376	No
R-HSA-349425	Autodegradation of the E3 ubiquitin ligase COP1	0.587938	0.0456913	0.556575	0.0509961	7.78887e-15	0.859538	0.394849	No
R-HSA-167044	Signalling to RAS	0.869402	0.0298206	0.838419	0.0395638	8.12836e-15	0.858787	0.394557	No
R-HSA-174437	Removal of the Flap Intermediate from the C-strand	-0.899292	0.0313946	-0.870725	0.0362245	8.22399e-15	-0.85855	-0.394465	No
R-HSA-352230	Amino acid transport across the plasma membrane	0.806504	0.0484681	0.841918	0.0345305	9.04485e-15	-0.856984	-0.393858	No
R-HSA-4608870	Asymmetric localization of PCP proteins	0.579066	0.047549	0.545837	0.0523853	9.04485e-15	0.856902	0.393826	No
R-HSA-5676590	NIK-->noncanonical NF-kB signaling	0.589792	0.0454285	0.557759	0.0513661	1.04504e-14	0.854435	0.392867	No
R-HSA-4090294	SUMOylation of intracellular receptors	-0.737125	0.0506955	-0.728631	0.0523387	1.21858e-14	-0.851866	-0.391867	No
R-HSA-69166	Removal of the Flap Intermediate	-0.896817	0.0313208	-0.867884	0.0358663	1.24154e-14	-0.851521	-0.391733	No
R-HSA-450321	JNK (c-Jun kinases) phosphorylation and activation mediated by activated human TAK1	0.871624	0.0287236	0.886066	0.0239246	1.2821e-14	-0.850989	-0.391526	No
R-HSA-68867	Assembly of the pre-replicative complex	0.579852	0.0457682	0.547022	0.0528674	1.30841e-14	0.850632	0.391387	No
R-HSA-174414	Processive synthesis on the C-strand of the telomere	-0.899314	0.0313542	-0.869518	0.0355199	1.3876e-14	-0.849602	-0.390986	No
R-HSA-1799339	SRP-dependent cotranslational protein targeting to membrane	0.847167	0.0353412	0.858413	0.0292969	1.39914e-14	-0.849564	-0.390971	No
R-HSA-8940973	RUNX2 regulates osteoblast differentiation	-0.851922	0.0265336	-0.831021	0.0327301	1.57759e-14	-0.847453	-0.390147	No
R-HSA-5674400	Constitutive Signaling by AKT1 E17K in Cancer	0.603703	0.0818293	0.644779	0.061225	1.62668e-14	-0.847104	-0.390011	No
R-HSA-141424	Amplification of signal from the kinetochores	-0.785155	0.076991	-0.706619	0.0902216	1.75056e-14	-0.845602	-0.389425	No
R-HSA-141444	Amplification of signal from unattached kinetochores via a MAD2 inhibitory signal	-0.785155	0.076991	-0.706619	0.0902216	1.75056e-14	-0.845602	-0.389425	No
R-HSA-9018519	Estrogen-dependent gene expression	0.85838	0.0315248	0.881175	0.0293214	1.8184e-14	-0.845009	-0.389193	No
R-HSA-162599	Late Phase of HIV Life Cycle	0.547001	0.163327	0.66423	0.0930652	2.01829e-14	-0.843367	-0.388551	No
R-HSA-112399	IRS-mediated signalling	0.563032	0.0743216	0.594391	0.0519868	2.23496e-14	-0.841637	-0.387874	No
R-HSA-977443	GABA receptor activation	0.854397	0.042779	0.838634	0.0434105	2.88375e-14	0.837201	0.386135	No
R-HSA-5607761	Dectin-1 mediated noncanonical NF-kB signaling	0.592038	0.0456662	0.558831	0.0514272	2.94968e-14	0.836785	0.385972	No
R-HSA-73886	Chromosome Maintenance	-0.88923	0.0423972	-0.858434	0.0458803	2.94968e-14	-0.83677	-0.385966	No
R-HSA-8948751	Regulation of PTEN stability and activity	0.570783	0.0507782	0.535507	0.0563973	3.09009e-14	0.835942	0.38564	No
R-HSA-9603798	Class I peroxisomal membrane protein import	-0.848171	0.0637706	-0.808185	0.0531556	3.11709e-14	-0.835782	-0.385578	No
R-HSA-1358803	Downregulation of ERBB2:ERBB3 signaling	0.819889	0.059928	0.852519	0.0481579	3.13005e-14	-0.835677	-0.385537	No
R-HSA-6791312	TP53 Regulates Transcription of Cell Cycle Genes	-0.227061	0.407975	0.0263625	0.417398	3.33688e-14	-0.834783	-0.385185	No
R-HSA-69186	Lagging Strand Synthesis	-0.86876	0.0390742	-0.831484	0.0417272	3.67237e-14	-0.832972	-0.384473	No
R-HSA-6803207	TP53 Regulates Transcription of Caspase Activators and Caspases	0.904061	0.0271291	0.891206	0.0307929	4.26157e-14	0.830489	0.383496	No
R-HSA-1362277	Transcription of E2F targets under negative control by DREAM complex	-0.248001	0.369946	-0.13389	0.374418	4.69936e-14	-0.829063	-0.382934	No
R-HSA-450282	MAPK targets/ Nuclear events mediated by MAP kinases	0.834473	0.0390604	0.804343	0.0344649	4.91719e-14	0.828092	0.382551	No
R-HSA-383280	Nuclear Receptor transcription pathway	-0.757036	0.050052	-0.71022	0.0678173	5.15802e-14	-0.827249	-0.382219	No
R-HSA-5205647	Mitophagy	0.743182	0.0346093	0.737425	0.0374175	5.47179e-14	-0.826181	-0.381797	No
R-HSA-176412	Phosphorylation of the APC/C	-0.833012	0.0438342	-0.820919	0.0349932	6.13192e-14	-0.824124	-0.380985	No
R-HSA-397014	Muscle contraction	0.900859	0.0360002	0.897635	0.0334638	6.15202e-14	0.824018	0.380943	No
R-HSA-73933	Resolution of Abasic Sites (AP sites)	-0.892389	0.035358	-0.865577	0.036186	6.44768e-14	-0.823189	-0.380615	No
R-HSA-167152	Formation of HIV elongation complex in the absence of HIV Tat	-0.903828	0.0424913	-0.870494	0.0380683	6.71692e-14	-0.822515	-0.380349	No
R-HSA-382556	ABC-family proteins mediated transport	0.599411	0.0441402	0.570111	0.0454049	7.07181e-14	0.821615	0.379993	No
R-HSA-2586552	Signaling by Leptin	0.805183	0.0345344	0.786713	0.030103	8.96059e-14	0.817657	0.378425	No
R-HSA-167161	HIV Transcription Initiation	-0.87835	0.0397417	-0.855595	0.038484	9.83337e-14	-0.815906	-0.37773	No
R-HSA-167162	RNA Polymerase II HIV Promoter Escape	-0.87835	0.0397417	-0.855595	0.038484	9.83337e-14	-0.815906	-0.37773	No
R-HSA-73776	RNA Polymerase II Promoter Escape	-0.87835	0.0397417	-0.855595	0.038484	9.83337e-14	-0.815906	-0.37773	No
R-HSA-73779	RNA Polymerase II Transcription Pre-Initiation And Promoter Opening	-0.87835	0.0397417	-0.855595	0.038484	9.83337e-14	-0.815906	-0.37773	No
R-HSA-75953	RNA Polymerase II Transcription Initiation	-0.87835	0.0397417	-0.855595	0.038484	9.83337e-14	-0.815906	-0.37773	No
R-HSA-76042	RNA Polymerase II Transcription Initiation And Promoter Clearance	-0.87835	0.0397417	-0.855595	0.038484	9.83337e-14	-0.815906	-0.37773	No
R-HSA-8934903	Receptor Mediated Mitophagy	-0.817234	0.0358772	-0.824572	0.041794	1.04934e-13	-0.814732	-0.377264	No
R-HSA-375165	NCAM signaling for neurite out-growth	-0.313335	0.345866	-0.0255214	0.418128	1.14286e-13	-0.813373	-0.376724	No
R-HSA-180292	GAB1 signalosome	0.899975	0.0307858	0.917167	0.0252874	1.20868e-13	-0.81234	-0.376314	No
R-HSA-5205685	Pink/Parkin Mediated Mitophagy	0.760514	0.0308405	0.757443	0.0351791	1.20868e-13	-0.812293	-0.376295	No
R-HSA-174417	Telomere C-strand (Lagging Strand) Synthesis	-0.882848	0.0338439	-0.852304	0.0375804	1.24452e-13	-0.811676	-0.376049	No
R-HSA-195721	Signaling by WNT	0.634882	0.0758765	0.650902	0.0699482	1.30049e-13	-0.81104	-0.375796	No
R-HSA-3560782	Diseases associated with glycosaminoglycan metabolism	-0.820426	0.0572557	-0.854723	0.0406224	1.43505e-13	0.809298	0.375103	No
R-HSA-168142	Toll Like Receptor 10 (TLR10) Cascade	0.875669	0.0346506	0.846727	0.0348682	1.47958e-13	0.808697	0.374864	No
R-HSA-168176	Toll Like Receptor 5 (TLR5) Cascade	0.875669	0.0346506	0.846727	0.0348682	1.47958e-13	0.808697	0.374864	No
R-HSA-975871	MyD88 cascade initiated on plasma membrane	0.875669	0.0346506	0.846727	0.0348682	1.47958e-13	0.808697	0.374864	No
R-HSA-6803205	TP53 regulates transcription of several additional cell death genes whose specific roles in p53-dependent apoptosis remain uncertain	-0.662127	0.0461099	-0.649993	0.047195	1.51567e-13	0.80826	0.374689	No
R-HSA-3247509	Chromatin modifying enzymes	0.717332	0.0456885	0.755128	0.0377056	1.52942e-13	-0.808081	-0.374618	No
R-HSA-4839726	Chromatin organization	0.717332	0.0456885	0.755128	0.0377056	1.52942e-13	-0.808081	-0.374618	No
R-HSA-8864260	Transcriptional regulation by the AP-2 (TFAP2) family of transcription factors	0.659785	0.103211	0.712743	0.0639506	1.67534e-13	-0.806564	-0.374013	No
R-HSA-5651801	PCNA-Dependent Long Patch Base Excision Repair	-0.898707	0.0312698	-0.874133	0.0360516	1.79784e-13	-0.805188	-0.373464	No
R-HSA-5663220	RHO GTPases Activate Formins	0.768095	0.0721751	0.816284	0.056993	1.79784e-13	-0.805249	-0.373489	No
R-HSA-72766	Translation	0.815792	0.0367661	0.828274	0.0304195	1.81755e-13	-0.805006	-0.373392	No
R-HSA-5601884	PIWI-interacting RNA (piRNA) biogenesis	-0.812134	0.0425745	-0.778307	0.0449698	1.85004e-13	-0.804561	-0.373214	No
R-HSA-5358565	Mismatch repair (MMR) directed by MSH2:MSH6 (MutSalpha)	-0.881701	0.0391646	-0.847418	0.0386696	1.87701e-13	-0.804277	-0.3731	No
R-HSA-375276	Peptide ligand-binding receptors	0.832195	0.0444071	0.800724	0.0427075	2.3538e-13	0.800352	0.371532	No
R-HSA-429958	mRNA decay by 3' to 5' exoribonuclease	-0.853964	0.0556622	-0.795201	0.0655744	2.44024e-13	-0.799718	-0.371278	No
R-HSA-167287	HIV elongation arrest and recovery	-0.719957	0.0539023	-0.667536	0.0568398	2.54766e-13	-0.79885	-0.37093	No
R-HSA-167290	Pausing and recovery of HIV elongation	-0.719957	0.0539023	-0.667536	0.0568398	2.54766e-13	-0.79885	-0.37093	No
R-HSA-674695	RNA Polymerase II Pre-transcription Events	-0.851852	0.0644786	-0.802504	0.0619182	2.8773e-13	-0.796832	-0.370122	No
R-HSA-210990	PECAM1 interactions	0.750157	0.0725899	0.806341	0.0571041	3.59684e-13	-0.793106	-0.368627	No
R-HSA-5620916	VxPx cargo-targeting to cilium	0.617552	0.079904	0.56382	0.0729197	3.77134e-13	0.792159	0.368246	No
R-HSA-6794361	Neurexins and neuroligins	-0.789738	0.0529481	-0.807988	0.0436903	3.9051e-13	0.79159	0.368017	No
R-HSA-4419969	Depolymerisation of the Nuclear Lamina	0.911741	0.0255373	0.910353	0.0264373	4.26761e-13	-0.790057	-0.367401	No
R-HSA-69541	Stabilization of p53	0.580668	0.0461098	0.556026	0.0496967	4.26761e-13	0.79002	0.367387	No
R-HSA-977444	GABA B receptor activation	0.852027	0.0440522	0.839366	0.0469845	4.38645e-13	0.789481	0.36717	No
R-HSA-991365	Activation of GABAB receptors	0.852027	0.0440522	0.839366	0.0469845	4.38645e-13	0.789481	0.36717	No
R-HSA-1362300	Transcription of E2F targets under negative control by p107 (RBL1) and p130 (RBL2) in complex with HDAC1	-0.681948	0.0687895	-0.635233	0.0655324	5.23444e-13	-0.786518	-0.365976	No
R-HSA-5694530	Cargo concentration in the ER	0.856799	0.0427221	0.849879	0.0434611	5.3619e-13	0.786055	0.36579	No
R-HSA-170968	Frs2-mediated activation	0.911392	0.0190753	0.926483	0.0200804	5.43755e-13	-0.785855	-0.365709	No
R-HSA-174113	SCF-beta-TrCP mediated degradation of Emi1	0.590002	0.0470735	0.558973	0.0527775	5.82047e-13	0.784649	0.365223	No
R-HSA-421270	Cell-cell junction organization	0.80647	0.032973	0.781945	0.0311701	6.05303e-13	0.783934	0.364934	No
R-HSA-8939211	ESR-mediated signaling	0.899562	0.0251664	0.909999	0.0249728	6.10427e-13	-0.783783	-0.364873	No
R-HSA-8953854	Metabolism of RNA	0.804115	0.0468108	0.828923	0.0380378	6.65304e-13	-0.782289	-0.36427	No
R-HSA-5358508	Mismatch Repair	-0.875604	0.0423383	-0.835961	0.043024	6.78882e-13	-0.781802	-0.364074	No
R-HSA-8964616	G beta:gamma signalling through CDC42	0.822676	0.0737784	0.780694	0.0686625	6.78882e-13	0.781807	0.364075	No
R-HSA-1222556	ROS and RNS production in phagocytes	0.771407	0.0514674	0.713608	0.0653493	6.88618e-13	0.781539	0.363967	No
R-HSA-1630316	Glycosaminoglycan metabolism	-0.751893	0.0601902	-0.79538	0.0384437	7.11689e-13	0.780959	0.363733	No
R-HSA-3000171	Non-integrin membrane-ECM interactions	-0.842183	0.0509722	-0.846894	0.0431781	7.28767e-13	-0.78046	-0.363531	No
R-HSA-8854050	FBXL7 down-regulates AURKA during mitotic entry and in early mitosis	0.588286	0.0475101	0.555848	0.0531289	7.29972e-13	0.780425	0.363517	No
R-HSA-180786	Extension of Telomeres	-0.897358	0.0307282	-0.870055	0.0366664	8.19797e-13	-0.778411	-0.362703	No
R-HSA-73887	Death Receptor Signalling	0.894109	0.0254645	0.880261	0.0262181	9.36725e-13	0.776141	0.361783	No
R-HSA-168271	Transport of Ribonucleoproteins into the Host Nucleus	0.760989	0.0465161	0.80157	0.0390809	1.00552e-12	-0.774989	-0.361317	No
R-HSA-70221	Glycogen breakdown (glycogenolysis)	0.720934	0.0695869	0.676418	0.0585634	1.01858e-12	0.774704	0.361201	No
R-HSA-69615	G1/S DNA Damage Checkpoints	0.579816	0.0468722	0.553862	0.050833	1.07751e-12	0.773641	0.36077	No
R-HSA-69563	p53-Dependent G1 DNA Damage Response	0.579846	0.0468896	0.553888	0.0508402	1.09279e-12	0.773308	0.360635	No
R-HSA-69580	p53-Dependent G1/S DNA damage checkpoint	0.579846	0.0468896	0.553888	0.0508402	1.09279e-12	0.773308	0.360635	No
R-HSA-76046	RNA Polymerase III Transcription Initiation	-0.905043	0.0273804	-0.882741	0.0295959	1.09279e-12	-0.773329	-0.360643	No
R-HSA-3000170	Syndecan interactions	-0.84591	0.0484622	-0.850109	0.0430828	1.18373e-12	-0.771905	-0.360065	No
R-HSA-110373	Resolution of AP sites via the multiple-nucleotide patch replacement pathway	-0.883373	0.0346528	-0.858405	0.0354446	1.27625e-12	-0.770575	-0.359525	No
R-HSA-168643	Nucleotide-binding domain, leucine rich repeat containing receptor (NLR) signaling pathways	0.869625	0.0357818	0.838212	0.0392485	1.32924e-12	0.769806	0.359213	No
R-HSA-5579029	Metabolic disorders of biological oxidation enzymes	-0.838519	0.0624239	-0.880457	0.0401285	1.74637e-12	0.765258	0.357362	No
R-HSA-5610783	Degradation of GLI2 by the proteasome	0.596457	0.0463763	0.568923	0.049406	1.86685e-12	0.764037	0.356865	No
R-HSA-5610785	GLI3 is processed to GLI3R by the proteasome	0.596457	0.0463763	0.568923	0.049406	1.86685e-12	0.764037	0.356865	No
R-HSA-5668541	TNFR2 non-canonical NF-kB pathway	0.591502	0.0517602	0.547024	0.0580495	1.88595e-12	0.763796	0.356767	No
R-HSA-187577	SCF(Skp2)-mediated degradation of p27/p21	0.585471	0.0494861	0.555035	0.0535045	2.50409e-12	0.758931	0.354781	No
R-HSA-167169	HIV Transcription Elongation	-0.918279	0.0249377	-0.901588	0.0255957	2.61504e-12	-0.758004	-0.354402	No
R-HSA-167200	Formation of HIV-1 elongation complex containing HIV-1 Tat	-0.918279	0.0249377	-0.901588	0.0255957	2.61504e-12	-0.758004	-0.354402	No
R-HSA-167246	Tat-mediated elongation of the HIV-1 transcript	-0.918279	0.0249377	-0.901588	0.0255957	2.61504e-12	-0.758004	-0.354402	No
R-HSA-376176	Signaling by ROBO receptors	0.803808	0.0385062	0.811115	0.0317669	2.61504e-12	-0.758171	-0.354471	No
R-HSA-8956319	Nucleobase catabolism	0.317873	0.359415	-0.0304516	0.445041	2.61504e-12	0.758044	0.354419	No
R-HSA-1660516	Synthesis of PIPs at the early endosome membrane	-0.656757	0.0630046	-0.57256	0.096749	2.65202e-12	-0.757667	-0.354264	No
R-HSA-3232118	SUMOylation of transcription factors	0.454896	0.117635	0.491173	0.111737	2.72789e-12	-0.757372	-0.354144	No
R-HSA-6803529	FGFR2 alternative splicing	0.808763	0.0631657	0.851981	0.0430087	2.76946e-12	-0.757014	-0.353997	No
R-HSA-5633008	TP53 Regulates Transcription of Cell Death Genes	0.82772	0.0481432	0.811076	0.0448004	2.97775e-12	0.755668	0.353447	No
R-HSA-6781827	Transcription-Coupled Nucleotide Excision Repair (TC-NER)	-0.577972	0.112328	-0.477671	0.135147	3.38098e-12	-0.753449	-0.352538	No
R-HSA-180534	Vpu mediated degradation of CD4	0.59778	0.0470275	0.568139	0.0517416	3.67229e-12	0.752029	0.351956	No
R-HSA-8878166	Transcriptional regulation by RUNX2	0.578352	0.0510684	0.542906	0.0552603	5.80967e-12	0.744075	0.348688	No
R-HSA-5610787	Hedgehog 'off' state	0.598662	0.0503651	0.571221	0.0510135	5.81056e-12	0.744	0.348657	No
R-HSA-72086	mRNA Capping	-0.863867	0.0489973	-0.836506	0.0401248	6.08128e-12	-0.743205	-0.34833	No
R-HSA-112315	Transmission across Chemical Synapses	0.847621	0.038698	0.856324	0.0293155	7.37885e-12	-0.739897	-0.346966	No
R-HSA-392499	Metabolism of proteins	0.809931	0.0408256	0.824095	0.0341264	7.95233e-12	-0.7386	-0.346431	No
R-HSA-6807505	RNA polymerase II transcribes snRNA genes	-0.839523	0.0563154	-0.781958	0.0639157	8.03263e-12	-0.738308	-0.346311	No
R-HSA-422475	Axon guidance	0.844469	0.0360648	0.846857	0.0339384	8.72365e-12	-0.736975	-0.34576	No
R-HSA-164952	The role of Nef in HIV-1 replication and disease pathogenesis	0.720786	0.0630539	0.740258	0.0482828	9.60734e-12	-0.735224	-0.345037	No
R-HSA-1483213	Synthesis of PE	-0.0540016	0.486628	0.04884	0.429928	1.01615e-11	-0.73417	-0.344601	No
R-HSA-2468052	Establishment of Sister Chromatid Cohesion	0.817019	0.0403759	0.847722	0.0334898	1.17106e-11	-0.731665	-0.343564	No
R-HSA-167238	Pausing and recovery of Tat-mediated HIV elongation	-0.709326	0.0482189	-0.674949	0.0517446	1.20612e-11	-0.731032	-0.343302	No
R-HSA-167243	Tat-mediated HIV elongation arrest and recovery	-0.709326	0.0482189	-0.674949	0.0517446	1.20612e-11	-0.731032	-0.343302	No
R-HSA-162658	Golgi Cisternae Pericentriolar Stack Reorganization	0.522129	0.119737	0.284107	0.335039	1.23094e-11	0.730559	0.343106	No
R-HSA-606279	Deposition of new CENPA-containing nucleosomes at the centromere	-0.77867	0.0521572	-0.762577	0.0546105	1.25942e-11	-0.730184	-0.342951	No
R-HSA-774815	Nucleosome assembly	-0.77867	0.0521572	-0.762577	0.0546105	1.25942e-11	-0.730184	-0.342951	No
R-HSA-112382	Formation of RNA Pol II elongation complex	-0.860255	0.0641649	-0.810786	0.0567765	1.28507e-11	-0.729816	-0.342798	No
R-HSA-75955	RNA Polymerase II Transcription Elongation	-0.860255	0.0641649	-0.810786	0.0567765	1.28507e-11	-0.729816	-0.342798	No
R-HSA-6782315	tRNA modification in the nucleus and cytosol	-0.86794	0.0409713	-0.842683	0.0387341	1.3072e-11	-0.729482	-0.342659	No
R-HSA-209543	p75NTR recruits signalling complexes	0.850375	0.0551235	0.810165	0.0610312	1.33235e-11	0.729047	0.342479	No
R-HSA-69278	Cell Cycle, Mitotic	-0.804593	0.06129	-0.766025	0.0573866	1.46473e-11	-0.72737	-0.341783	No
R-HSA-1640170	Cell Cycle	-0.741937	0.076781	-0.670371	0.091274	1.78057e-11	-0.723851	-0.340322	No
R-HSA-189200	Cellular hexose transport	-0.827819	0.0386973	-0.85837	0.0341473	1.85092e-11	0.723292	0.340089	No
R-HSA-1606322	ZBP1(DAI) mediated induction of type I IFNs	0.656576	0.0682928	0.595295	0.0746063	1.92061e-11	0.722541	0.339777	No
R-HSA-167160	RNA Pol II CTD phosphorylation and interaction with CE during HIV infection	-0.880814	0.0339714	-0.857655	0.0321617	1.92177e-11	-0.72253	-0.339773	No
R-HSA-77075	RNA Pol II CTD phosphorylation and interaction with CE	-0.880814	0.0339714	-0.857655	0.0321617	1.92177e-11	-0.72253	-0.339773	No
R-HSA-419037	NCAM1 interactions	-0.749303	0.0527879	-0.756652	0.0546502	2.09168e-11	-0.720981	-0.339128	No
R-HSA-5173105	O-linked glycosylation	-0.868806	0.0364843	-0.886767	0.0250639	2.36262e-11	0.71893	0.338274	No
R-HSA-8876725	Protein methylation	0.87192	0.0408806	0.897495	0.0294685	2.9258e-11	-0.715201	-0.336719	No
R-HSA-8939902	Regulation of RUNX2 expression and activity	0.580458	0.0494693	0.550599	0.0556066	2.92991e-11	0.715095	0.336674	No
R-HSA-174084	Autodegradation of Cdh1 by Cdh1:APC/C	0.573583	0.0466671	0.544839	0.0509186	2.97924e-11	0.714762	0.336535	No
R-HSA-8941858	Regulation of RUNX3 expression and activity	0.573759	0.0523763	0.538084	0.0562571	3.12872e-11	0.713844	0.336152	No
R-HSA-2187338	Visual phototransduction	-0.790386	0.0588779	-0.772864	0.0585617	3.18446e-11	-0.713501	-0.336009	No
R-HSA-597592	Post-translational protein modification	0.702202	0.0700072	0.738593	0.0622708	3.24034e-11	-0.713226	-0.335894	No
R-HSA-5663205	Infectious disease	0.805365	0.0442308	0.819333	0.0356068	3.35283e-11	-0.712626	-0.335643	No
R-HSA-162594	Early Phase of HIV Life Cycle	0.802848	0.0519052	0.834719	0.0411864	3.51942e-11	-0.711747	-0.335276	No
R-HSA-159234	Transport of Mature mRNAs Derived from Intronless Transcripts	0.018514	0.435226	0.338431	0.302959	3.87339e-11	-0.710109	-0.33459	No
R-HSA-76061	RNA Polymerase III Transcription Initiation From Type 1 Promoter	-0.909737	0.0246006	-0.892592	0.0260811	3.90308e-11	-0.70979	-0.334457	No
R-HSA-8939236	RUNX1 regulates transcription of genes involved in differentiation of HSCs	0.570261	0.0496157	0.543038	0.0507897	4.0141e-11	0.70929	0.334247	No
R-HSA-388841	Costimulation by the CD28 family	0.792175	0.0594454	0.840932	0.0507718	4.36034e-11	-0.707865	-0.333651	No
R-HSA-5627117	RHO GTPases Activate ROCKs	0.868683	0.0322505	0.84945	0.0298436	4.55851e-11	0.706991	0.333285	No
R-HSA-72172	mRNA Splicing	0.770307	0.0616909	0.817631	0.0410872	4.55851e-11	-0.707053	-0.333311	No
R-HSA-111447	Activation of BAD and translocation to mitochondria	0.802456	0.0502894	0.804535	0.0421139	4.71042e-11	-0.706404	-0.333039	No
R-HSA-69205	G1/S-Specific Transcription	-0.621164	0.0680698	-0.592163	0.0570752	5.81568e-11	-0.702622	-0.331452	No
R-HSA-5610780	Degradation of GLI1 by the proteasome	0.593187	0.0464714	0.566566	0.0502701	6.37228e-11	0.700972	0.330759	No
R-HSA-168274	Export of Viral Ribonucleoproteins from Nucleus	0.798345	0.0468596	0.831385	0.0356874	6.7469e-11	-0.699967	-0.330337	No
R-HSA-163615	PKA activation	0.852993	0.0355025	0.872257	0.0262964	6.80704e-11	-0.699727	-0.330235	No
R-HSA-8866654	E3 ubiquitin ligases ubiquitinate target proteins	0.768689	0.0663476	0.774205	0.0620454	6.88096e-11	-0.699518	-0.330148	No
R-HSA-397795	G-protein beta:gamma signalling	0.850275	0.0557856	0.830688	0.0375623	6.92404e-11	0.699363	0.330083	No
R-HSA-4086400	PCP/CE pathway	0.603678	0.0474269	0.566333	0.0511775	7.26068e-11	0.698503	0.329721	No
R-HSA-68949	Orc1 removal from chromatin	0.58617	0.0458899	0.558278	0.0525047	7.47867e-11	0.697964	0.329494	No
R-HSA-72163	mRNA Splicing - Major Pathway	0.769736	0.0623575	0.816738	0.0412737	8.34331e-11	-0.696051	-0.328689	No
R-HSA-5689603	UCH proteinases	0.563201	0.0529115	0.537441	0.05714	8.53506e-11	0.695534	0.328471	No
R-HSA-2979096	NOTCH2 Activation and Transmission of Signal to the Nucleus	0.883874	0.0429188	0.873707	0.0366932	1.03977e-10	0.692002	0.326981	No
R-HSA-9018678	Biosynthesis of specialized proresolving mediators (SPMs)	0.749635	0.0729685	0.68219	0.0756601	1.12773e-10	0.690486	0.326341	No
R-HSA-174178	APC/C:Cdh1 mediated degradation of Cdc20 and other APC/C:Cdh1 targeted proteins in late mitosis/early G1	0.572631	0.0455978	0.545209	0.0511291	1.14857e-10	0.690195	0.326219	No
R-HSA-174154	APC/C:Cdc20 mediated degradation of Securin	0.57343	0.0455965	0.54621	0.0509283	1.21238e-10	0.689204	0.3258	No
R-HSA-429914	Deadenylation-dependent mRNA decay	0.790656	0.0668856	0.833131	0.0519	1.23744e-10	-0.688851	-0.325651	No
R-HSA-72306	tRNA processing	-0.836055	0.0580915	-0.78865	0.0574453	1.32847e-10	-0.687502	-0.325081	No
R-HSA-5684264	MAP3K8 (TPL2)-dependent MAPK1/3 activation	0.854923	0.0420155	0.888042	0.0325714	1.38506e-10	-0.686752	-0.324763	No
R-HSA-9009391	Extra-nuclear estrogen signaling	0.900143	0.0277862	0.899662	0.0245406	1.39231e-10	-0.686631	-0.324712	No
R-HSA-69017	CDK-mediated phosphorylation and removal of Cdc6	0.573368	0.0456288	0.546032	0.0509721	1.71008e-10	0.682924	0.323143	No
R-HSA-5635838	Activation of SMO	0.802613	0.0548512	0.776969	0.0618747	1.76625e-10	0.682246	0.322855	No
R-HSA-191859	snRNP Assembly	-0.831779	0.0609862	-0.782446	0.059582	1.79387e-10	-0.681854	-0.322689	No
R-HSA-194441	Metabolism of non-coding RNA	-0.831779	0.0609862	-0.782446	0.059582	1.79387e-10	-0.681854	-0.322689	No
R-HSA-193368	Synthesis of bile acids and bile salts via 7alpha-hydroxycholesterol	0.237401	0.29482	0.199842	0.343631	1.84095e-10	0.681498	0.322538	No
R-HSA-1810476	RIP-mediated NFkB activation via ZBP1	0.793784	0.0495659	0.760217	0.0494529	1.9027e-10	0.680737	0.322215	No
R-HSA-70263	Gluconeogenesis	0.745633	0.0614335	0.697956	0.0564705	1.95232e-10	0.680238	0.322004	No
R-HSA-3065678	SUMO is transferred from E1 to E2 (UBE2I, UBC9)	0.564015	0.0903011	0.597853	0.0804952	2.44437e-10	-0.676262	-0.320315	No
R-HSA-210993	Tie2 Signaling	0.438646	0.148648	0.520113	0.105369	2.8202e-10	-0.673554	-0.319163	No
R-HSA-74158	RNA Polymerase III Transcription	-0.892334	0.0302278	-0.873658	0.0316082	2.82928e-10	-0.673422	-0.319107	No
R-HSA-166658	Complement cascade	-0.811544	0.0349076	-0.815005	0.0354371	2.91606e-10	0.672917	0.318892	No
R-HSA-210991	Basigin interactions	0.868688	0.0462881	0.8745	0.0331917	2.98813e-10	-0.672467	-0.318701	No
R-HSA-165159	mTOR signalling	0.750714	0.0846979	0.733718	0.061216	3.31177e-10	-0.670555	-0.317886	No
R-HSA-430039	mRNA decay by 5' to 3' exoribonuclease	-0.681062	0.0542379	-0.681076	0.0608036	3.33333e-10	0.670383	0.317813	No
R-HSA-881907	Gastrin-CREB signalling pathway via PKC and MAPK	0.89588	0.0252434	0.90395	0.0221805	3.46748e-10	-0.669645	-0.317498	No
R-HSA-8863795	Downregulation of ERBB2 signaling	0.881916	0.0301325	0.906161	0.0269564	3.53334e-10	-0.669251	-0.317331	No
R-HSA-2470946	Cohesin Loading onto Chromatin	0.880467	0.0317674	0.904198	0.0263505	3.54861e-10	-0.669171	-0.317296	No
R-HSA-8951936	RUNX3 regulates p14-ARF	0.87341	0.0254607	0.885843	0.0336354	3.60204e-10	-0.668883	-0.317174	No
R-HSA-5696399	Global Genome Nucleotide Excision Repair (GG-NER)	-0.562768	0.0976212	-0.477126	0.122985	5.66111e-10	-0.660625	-0.313645	No
R-HSA-2644602	Signaling by NOTCH1 PEST Domain Mutants in Cancer	0.893071	0.0288494	0.901105	0.0287881	5.88037e-10	-0.659871	-0.313322	No
R-HSA-2644603	Signaling by NOTCH1 in Cancer	0.893071	0.0288494	0.901105	0.0287881	5.88037e-10	-0.659871	-0.313322	No
R-HSA-2644606	Constitutive Signaling by NOTCH1 PEST Domain Mutants	0.893071	0.0288494	0.901105	0.0287881	5.88037e-10	-0.659871	-0.313322	No
R-HSA-2894858	Signaling by NOTCH1 HD+PEST Domain Mutants in Cancer	0.893071	0.0288494	0.901105	0.0287881	5.88037e-10	-0.659871	-0.313322	No
R-HSA-2894862	Constitutive Signaling by NOTCH1 HD+PEST Domain Mutants	0.893071	0.0288494	0.901105	0.0287881	5.88037e-10	-0.659871	-0.313322	No
R-HSA-3215018	Processing and activation of SUMO	0.481801	0.122529	0.528167	0.102206	6.4101e-10	-0.658235	-0.312621	No
R-HSA-190873	Gap junction degradation	0.758052	0.0467196	0.714113	0.0614003	6.56628e-10	0.657709	0.312396	No
R-HSA-392170	ADP signalling through P2Y purinoceptor 12	0.773545	0.0844445	0.73231	0.0746966	6.6077e-10	0.657586	0.312343	No
R-HSA-196025	Formation of annular gap junctions	0.757387	0.0467774	0.712777	0.0624105	6.7311e-10	0.657202	0.312179	No
R-HSA-68884	Mitotic Telophase/Cytokinesis	0.832702	0.0372	0.859904	0.0312702	7.63765e-10	-0.6549	-0.311191	No
R-HSA-204005	COPII-mediated vesicle transport	0.756378	0.0649125	0.749162	0.0645509	8.87467e-10	0.652087	0.309983	No
R-HSA-202040	G-protein activation	0.771202	0.0851722	0.731	0.0736982	8.87881e-10	0.652072	0.309977	No
R-HSA-6811434	COPI-dependent Golgi-to-ER retrograde traffic	-0.54729	0.108621	-0.588077	0.0935787	9.10619e-10	0.651679	0.309808	No
R-HSA-9010553	Regulation of expression of SLITs and ROBOs	0.798439	0.03581	0.802627	0.0307854	9.64325e-10	-0.650561	-0.309327	No
R-HSA-204174	Regulation of pyruvate dehydrogenase (PDH) complex	-0.802358	0.0533432	-0.829677	0.0476329	1.05631e-09	0.648864	0.308597	No
R-HSA-2046104	alpha-linolenic (omega3) and linoleic (omega6) acid metabolism	0.840036	0.0480552	0.824051	0.0629594	1.18378e-09	0.646674	0.307654	No
R-HSA-2046106	alpha-linolenic acid (ALA) metabolism	0.840036	0.0480552	0.824051	0.0629594	1.18378e-09	0.646674	0.307654	No
R-HSA-216083	Integrin cell surface interactions	0.806452	0.0568073	0.809744	0.0457948	1.25544e-09	-0.645571	-0.307179	No
R-HSA-6784531	tRNA processing in the nucleus	-0.832078	0.0563603	-0.785179	0.0544392	1.28947e-09	-0.645012	-0.306938	No
R-HSA-373080	Class B/2 (Secretin family receptors)	0.711561	0.0935448	0.691121	0.0767915	1.6348e-09	0.640594	0.305032	No
R-HSA-202433	Generation of second messenger molecules	0.766746	0.065257	0.809756	0.0491911	1.65328e-09	-0.640421	-0.304957	No
R-HSA-1793185	Chondroitin sulfate/dermatan sulfate metabolism	-0.598279	0.0820291	-0.646026	0.0596952	1.66436e-09	0.640238	0.304879	No
R-HSA-71291	Metabolism of amino acids and derivatives	0.786786	0.0351214	0.792096	0.0316631	1.98922e-09	-0.636939	-0.303453	No
R-HSA-1643685	Disease	0.858059	0.0396537	0.862198	0.0310418	2.05964e-09	-0.636275	-0.303165	No
R-HSA-6785807	Interleukin-4 and Interleukin-13 signaling	0.844767	0.066714	0.785417	0.0590475	2.23852e-09	0.634613	0.302446	No
R-HSA-2564830	Cytosolic iron-sulfur cluster assembly	-0.895362	0.0258328	-0.867466	0.0307599	2.43901e-09	-0.632962	-0.301731	No
R-HSA-391903	Eicosanoid ligand-binding receptors	-0.847143	0.0567361	-0.886557	0.037025	2.48698e-09	0.632705	0.30162	No
R-HSA-69231	Cyclin D associated events in G1	0.838943	0.0319843	0.830765	0.0457489	2.70505e-09	-0.630955	-0.300861	No
R-HSA-69236	G1 Phase	0.838943	0.0319843	0.830765	0.0457489	2.70505e-09	-0.630955	-0.300861	No
