# Supplementary material
Source: HighWire-hosted journal article supplement (https://ard.bmj.com/content/79/9/1218)
Supplement: inline-supplementary-material-9 [file inline-supplementary-material-9.xlsx]

## Sheet: Results Reactome
Threshold	0.1	<------	Select the level of significance for the AdjR2					DE: Differentially expressed vs controls																		Pathway	Discovery adjR2	Discovery adjR2 DE+	Discovery adjR2 DE-	Basophils	CD15highCD16neg_Eosinophils	CD15lowCD16high_Neutrophils	CD15posCD14low_LDGs	CD14highCD16neg_classicalMonocytes	CD14posCD16pos_intermediateMonocytes	CD14lowCD16pos_nonclassicalMonocytes	CD56high_CD16low_NK	CD56low_CD16high_NK	CD3posCD56pos_NklikeTcells	CD19pos_Bcells	CD4pos_Tcells	CD8pos_Tcells	CD8pos_CD4pos_Tcells	CD8neg_CD4neg_Tcells	mDC1	mDC2	CD1cneg_CD141neg_mDC	pDC	HCQ
								p: probability that differentially expressed reactome/genes are linked with models influenced by immunophenotyping																		R-HSA-1059683
																					Discovery Exp	AdjR2 < T	AdjR2 >= T			R-HSA-109581
Discovery Obs	AdjR2 < T	AdjR2 >= T	Sum		Adj R2 by DE status				Validation Obs	AdjR2 < T	AdjR2 >= T	Sum		Adj R2 by DE status							DE-	374.832	677.168			R-HSA-109582
DE-	438	614	1052		0,201 (0,149 - 0,268)				DE-	231	370	601		0,188 (0,146 - 0,25)							DE+	80.1684	144.832			R-HSA-109606	0.2034	0.2034		0.5	0	9.4	4.5	6	0	2.5	0	12.4	13.8	11.6	9.3	7.1	4.7	0	0	0	0	9.8	0
DE+	17	208	225		0,217 (0,161 - 0,294)				DE+	47	629	676		0,271 (0,206 - 0,344)												R-HSA-109704	0.1087		0.1087	0	0	35.6	0	22.4	22.3	0	0	12.4	0	0	0	2.4	0	0	0	0	0	4.8	0
Sum	455	822	1277						Sum	278	999	1277														R-HSA-110312	0.3918		0.3918	0	4	31.2	0.3	2.8	9.3	0.5	0	3.4	8.1	0	16	12.4	0	5.9	0	0	0	0	0
																										R-HSA-110313
p	3.38283e-22								p	3.67492e-25																R-HSA-110314	0.2404	0.2404		0	0	48.4	0	0	0	0	0	0	14.7	0	10.8	20.3	0	0	0	0	0	0	0
OR	8.72811								OR	8.35532																R-HSA-110320	0.3247	0.3247		0	1.4	38.3	2.4	0	2.3	4.7	0	0	7.8	0.2	18	9.7	0	6.6	0	0	4.3	0	0
OR CI95	5.24441	14.5259							OR CI95	5.95358	11.7259															R-HSA-110328
Accuracy*	0.607839								Accuracy*	0.730282			*Balanced accuracy, mathematical mean of sensitivity and specificity													R-HSA-110329
Adj R2	0,207 (0,153 - 0,276)								Adj R2	0,24 (0,171 - 0,316)																R-HSA-110330
																										R-HSA-110331
Cell subtype/therapy				Relative contribution in significant models, mean (SD)																						R-HSA-110373		0.3273		0	0	40.7	3.3	0	0	2.7	0	0	6.6	14.4	10.9	10.6	0	0	0	3.4	0	0	0
				Discovery		Validation															Validation exp	AdjR2 < T	AdjR2 >= T			R-HSA-111367	0.3273	0.1008		0	2.2	33.7	5.3	22.1	0	0	4.9	5.3	3.8	4.9	8.2	2.1	0	3.8	0	0	3.7	0	0
Basophils				0,94%, (2,24%)		1,61%, (3,81%)															DE-	130.836	470.164			R-HSA-111447	0.1008	0.2639		0	0	51.8	0	11.9	0	0	0	0	15.8	0	0	6.5	0	0	0	0	0	6	0
CD15highCD16neg_Eosinophils				1,07%, (1,78%)		5,35%, (6,75%)															DE+	147.164	528.836			R-HSA-111458	0.2639	0.1556		1.5	0.9	25.9	6	12.4	0.9	3.8	0	2.9	2.5	10.8	10.3	2.2	1.1	0	0	0	0	9.5	0
CD15lowCD16high_Neutrophils				30,7%, (15,63%)		27,02%, (17,41%)																				R-HSA-111461	0.1556	0.1778		1.8	1.5	24.5	5.6	11.7	0	4.5	0	2.5	2	11.5	11.3	3.3	1.9	0	0	0	0	9.7	0
CD15posCD14low_LDGs				1,74%, (2,36%)		0,72%, (1,8%)																				R-HSA-111465	0.1778
CD14highCD16neg_classicalMonocytes				12,04%, (10,82%)		5,29%, (8,23%)																				R-HSA-111469
CD14posCD16pos_intermediateMonocytes				4,67%, (6,67%)		7,3%, (7,97%)																				R-HSA-111471		0.1866		3.7	1	19.8	5.3	10.3	0	5.4	0	2.5	2.7	13.8	10.2	5.7	2.9	0	0	0	0	9.3	0
CD14lowCD16pos_nonclassicalMonocytes				1,33%, (2,3%)		1,35%, (2,83%)																				R-HSA-111885	0.1866	0.1126		0	1.2	4.4	8.9	6.7	10.3	6	6.2	12.2	5.3	13.7	0	0	0	0	3.1	0	1	3.7	0
CD56high_CD16low_NK				0,63%, (1,76%)		1,05%, (2,74%)																				R-HSA-111931	0.1126	0.1666		0	3.1	23.8	2.1	2.5	3.3	1.7	1.4	17.1	8.3	10.7	0	11.3	3.5	2	3.6	0	0	5.5	0
CD56low_CD16high_NK				5,52%, (6,17%)		8,59%, (7,7%)																				R-HSA-111932	0.1666
CD3posCD56pos_NklikeTcells				5,5%, (5,24%)		4,16%, (5,04%)																				R-HSA-111933
CD19pos_Bcells				3,59%, (6,05%)		7,46%, (8,13%)																				R-HSA-111996
CD4pos_Tcells				9,09%, (8,37%)		5,96%, (7,26%)																				R-HSA-111997
CD8pos_Tcells				12,1%, (10,53%)		4,59%, (6,15%)																				R-HSA-112040
CD8pos_CD4pos_Tcells				0,84%, (2,08%)		3,07%, (4,12%)																				R-HSA-112043
CD8neg_CD4neg_Tcells				1,76%, (2,55%)		3,99%, (5,92%)																				R-HSA-112310
mDC1				0,51%, (1,72%)		1,66%, (4,53%)																				R-HSA-112314		0.2835		0	4	21.4	3.7	12.6	5.3	4.5	4.3	6.9	0.4	8.9	3	7.1	0	0.2	3.3	0	0	0	1.8
mDC2				0,81%, (1,93%)		0,28%, (1,05%)																				R-HSA-112315	0.2835	0.2175		0	3.1	19.4	5.8	11.3	6.8	5.6	3.3	8.5	0	10.1	3.3	3.5	0	0	2.8	0	0	2	1.1
CD1cneg_CD141neg_mDC				0,54%, (1,56%)		0,44%, (2,06%)																				R-HSA-112316	0.2175	0.2875		0	3.3	25.9	4.2	14.5	6.3	4.8	2.7	6.1	0.1	7.6	4	4.9	0	0	2.5	0	0	0.4	0.7
pDC				2,99%, (4,51%)		4,09%, (4,98%)																				R-HSA-112382	0.2875	0.2427		0	0	39.2	4	0	5.4	0	0	0	15.6	0	21.3	13.1	1.3	0	0	0	0	0	0
HCQ				0,42%, (1,48%)		0,05%, (0,35%)																				R-HSA-112399	0.2427	0.1136		0	0	31.9	0	21.6	14.7	0	0	13.2	0.2	7.3	0	0.7	0	0	0	0	0	10.4	0
IS				0,94%, (2,27%)		1,3%, (2,86%)																				R-HSA-112409	0.1136
DCS				2,29%, (3,74%)		4,69%, (6,13%)																				R-HSA-112412		0.1962		0	0	28.7	0	5.7	5.9	0	0	10.5	0	10.5	16	0	0	0	0	0	0	12.1	2.1
																										R-HSA-113418	0.1962	0.1046		1.3	0.7	27.5	9.2	13.8	0	2.5	0.2	9.2	3.9	4.5	15.7	0	3.6	0	0	5.3	0	2.6	0
																										R-HSA-113501	0.1046
																										R-HSA-113510
																										R-HSA-114452		0.2468		2.8	0	51.4	0	12.4	0	0	0	0.7	15.9	0	0	4.1	0	0	0	0	0.5	3.9	0
																										R-HSA-114508	0.2468		0.3265	0	0	33.9	0	0	12.1	0	0.9	2.5	2.9	0	21.4	14.9	1.8	7.6	0	0	0	2.1	0
																										R-HSA-114604	0.3265
																										R-HSA-114608
																										R-HSA-1168372		0.1585		0	0	57.4	0.1	0	0	0	0	0	1	0	6.8	34.8	0	0	0	0	0	0	0
																										R-HSA-1169091	0.1585
																										R-HSA-1169408
																										R-HSA-1169410
																										R-HSA-1170546
																										R-HSA-1181150
																										R-HSA-1187000		0.1956		0	0	1.2	1.9	1.2	0	4.1	1.2	0	0	41.6	24.4	15.4	3.6	0	0	0	0	0	4.6
																										R-HSA-1221632	0.1956		0.2163	0	0	0	0.5	38.6	2.3	0	0	15.2	18.6	0	0	14.6	0	4.9	0	0	0	5.2	0
																										R-HSA-1222556	0.2163	0.1925		2.4	0	31.3	0	12.5	0	0	0	14.2	6.9	0	0	23.8	0	0	0	0	0	9	0
																										R-HSA-1226099	0.1925
																										R-HSA-1227986		0.1621		2.6	0	13.9	4.1	9.4	4.6	1.2	0	15.8	6.5	11.1	0	12.9	3.6	5.2	0	2.4	0	6.6	0
																										R-HSA-1234174	0.1621
																										R-HSA-1234176
																										R-HSA-1236382		0.1934		0	0	13.7	3.4	14.2	7	1.2	0	9.4	6.8	2.8	0	20.4	6.2	5.4	0	2.1	0	7.4	0
																										R-HSA-1236394	0.1934
																										R-HSA-1236974			0.1074	0	0	9.7	5.3	23	17.4	0	0	23	8	0	0	0.9	0	0	7.5	0	0	5.3	0
																										R-HSA-1236975	0.1074		0.103	0	0	8	5.3	20.8	19.8	0	0	24.7	9	0	0	0	0	0	8.2	0	0	4.2	0
																										R-HSA-1236977	0.103
																										R-HSA-1236978
																										R-HSA-1237044
																										R-HSA-1250196		0.1141		4.8	2.3	22.1	3.8	10.6	0	1.7	0.2	10.2	3.2	14.1	9.1	0	4.4	0.5	0	2.8	0	5.2	0
																										R-HSA-1251985	0.1141
																										R-HSA-1257604			0.1378	0	0	30.1	1.1	0	12.5	0	0	0	17	0	16	18.2	0	0	0	0	0.6	0	0
																										R-HSA-1266695	0.1378		0.1872	0	0	2.6	0	22.6	17.2	0	0	4.2	17.6	0	17.4	6.8	0	4.5	0	0	0	0	0
																										R-HSA-1266738	0.1872	0.2476		0	0	29.6	0.8	5.2	14.2	3.4	0	0	0	7.9	15.6	0	0	4.2	0	0	2.2	0	0
																										R-HSA-1268020	0.2476	0.2611		0	1.7	40.7	2	22.4	0	0.9	0.2	4.4	0	0	15.5	1.2	0	0	0	3.2	0.8	0	0
																										R-HSA-1280215	0.2611		0.1573	0	0	9.6	0	0	31.1	2.8	0	19.6	12.8	0	0	1.8	1.5	8.5	12.3	0	0	0	0
																										R-HSA-1280218	0.1573	0.1828		0	2.7	42.7	0	0	21.6	0	0	1	4.7	17.2	0	7.8	0	0	2.4	0	0	0	0
																										R-HSA-1295596	0.1828	0.1842		0	0	38.2	3.2	24	10.7	0	0	6	0	0	8.8	0	0	0	2.9	1	0	0	5.1
																										R-HSA-1296041	0.1842	0.3825		6.2	5.6	33.3	1.6	16.6	0.2	2	0.1	3.9	3.5	0.1	9.3	7.8	3.6	1	0	0	1.3	3.9	0
																										R-HSA-1296059	0.3825	0.3825		6.2	5.6	33.3	1.6	16.6	0.2	2	0.1	3.9	3.5	0.1	9.3	7.8	3.6	1	0	0	1.3	3.9	0
																										R-HSA-1296065	0.3825	0.3825		6.2	5.6	33.3	1.6	16.6	0.2	2	0.1	3.9	3.5	0.1	9.3	7.8	3.6	1	0	0	1.3	3.9	0
																										R-HSA-1296071	0.3825	0.3553		5.2	3.5	38.3	1.1	17.1	0	2.7	0	3.8	1.4	2	9.7	9	3.6	0	0	1.4	0	1.4	0
																										R-HSA-1296072	0.3553	0.126		0	10.5	30.9	0	4.8	5.9	0	12	7.3	10.5	0	2.1	0	6.7	0.6	0	0	0	8.7	0
																										R-HSA-1358803	0.126
																										R-HSA-1362277		0.2193		0	0	52.8	0	0	0	0	0	0	0	0	4.2	42.5	0	0	0	0	0	0	0.5
																										R-HSA-1362300	0.2193	0.2712		0	0	48.4	0	0	0	0	0	6.5	2.6	0	0	42.2	0	0	0	0	0	0.2	0
																										R-HSA-1362409	0.2712
																										R-HSA-1368082
																										R-HSA-1368108		0.1391		0	0	23.8	0	23	13.2	0	0	12.3	10.8	5	3.2	0	0	0	0	8.7	0	0	0
																										R-HSA-1369062	0.1391
																										R-HSA-139853
																										R-HSA-140534			0.3568	0	3.6	39.3	0.8	0	7.8	0	0	8.4	5.8	3.1	15.9	9.5	2.3	3.1	0.5	0	0	0	0
																										R-HSA-140837	0.3568		0.1501	0	0	7.3	7.5	11.5	17.1	0	0	16.9	8.2	0	0	9.6	3.5	5.5	0	0	0	3.3	2.2
																										R-HSA-140875	0.1501		0.1866	0	0	36.9	0	0	0	0	0	0	0.5	5.2	14.6	31	0	0	0	0	0	0	0
																										R-HSA-140877	0.1866		0.2451	0	0	37.3	0	0	0	0	0	0	6.4	1.6	14.4	29.3	0	0	0	0	0	0	0
																										R-HSA-141405	0.2451
																										R-HSA-141424		0.2002		1.4	0	26.8	0	7	7.8	0	0	8.1	10.5	2.5	0	24.6	0	0	0	0.5	0	10.8	0
																										R-HSA-141430	0.2002
																										R-HSA-141444		0.2002		1.4	0	26.8	0	7	7.8	0	0	8.1	10.5	2.5	0	24.6	0	0	0	0.5	0	10.8	0
																										R-HSA-1428517	0.2002	0.1481		0	0	41.6	5.7	30.2	0	0	0	2.4	0	0	2.7	0	0	0	0	0	3.9	0	0
																										R-HSA-1430728	0.1481
																										R-HSA-1433557
																										R-HSA-1433559			0.188	0	0	46.8	0	0	0	0	0	0	4	0	10.3	36.1	0	2.8	0	0	0	0	0
																										R-HSA-1442490	0.188		0.2124	0	0	40.8	0	0	0	0	0	3.8	14.1	0	6.8	21.8	0	6.7	0	0	0	6	0
																										R-HSA-1445148	0.2124
																										R-HSA-1474151		0.2403		0	0	48.3	0	0	0	11.1	0	0	9.3	0	0	31.3	0	0	0	0	0	0	0
																										R-HSA-1474165	0.2403		0.2467	0	0	0.4	0	39.3	0	0	0	15.4	19	0	0	14	0	4.9	0	0	0	7	0
																										R-HSA-1474228	0.2467		0.1985	0	0	6.2	0	28.3	0	0	0	1.2	4.4	0	4.6	31	0	7.1	0	0	0	7.8	0
																										R-HSA-1474244	0.1985		0.1582	0	0	0	0	29.5	0	0	0	0	3.3	0	0	47.3	0	0	0	0	0	7.2	0
																										R-HSA-1474290	0.1582		0.1773	0	3.1	18.4	0	33.4	0	7.5	0	6.3	6.9	0.3	0	6	0	5.1	0	0	0.9	6.3	0.2
																										R-HSA-1480926	0.1773
																										R-HSA-1482788		0.3641		0.4	4.3	33.6	1.5	11.6	4.7	0	0	2.9	2.5	0	18.5	5.3	1.6	1.8	0	0	2.4	0	0
																										R-HSA-1482801	0.3641	0.1929		0	4.6	29.9	0.9	20.4	0	1.4	0.9	3.8	0	2.3	13	0	0	1.2	1.4	0	0	4.9	0.6
																										R-HSA-1482839	0.1929	0.2977		0	2.8	41.1	0	0.4	5.5	0	3	3	6.9	5.5	18.3	4.5	0	2.6	0	0	0	0	0
																										R-HSA-1483166	0.2977	0.1128		0	3	15.9	0	0	0	0	0	22	5	0	20.4	0	0	2	0	0	5	0	7.8
																										R-HSA-1483191	0.1128
																										R-HSA-1483206		0.2957		3.3	3.7	39.2	1.3	7	0	0	0	0	0.9	0	12.6	12.5	1.1	0.5	1.9	0	0	0	2.3
																										R-HSA-1483213	0.2957
																										R-HSA-1483249
																										R-HSA-1483255		0.1246		0	0	4.2	0.8	22.5	10.4	0.4	4.5	16	10.3	0	0	6.7	0	0	0	13.6	0	2.6	0
																										R-HSA-1483257	0.1246	0.3087		0	2.7	28	3	17.1	4.5	1.7	2.2	6.6	0.6	1.6	10.1	0.7	0	0.5	1.8	0	2.5	2.9	0.1
																										R-HSA-1489509	0.3087	0.1015		0	0	35.6	1.2	0.8	15.2	0	3.8	3.8	0	0	15.3	22.6	0	0	1.5	0	0	0	0
																										R-HSA-1500620	0.1015		0.2332	0	0	0	0	40.6	0	0	0	14.2	17.5	0	0	18.5	0	3.2	0	0	0	6.1	0
																										R-HSA-1500931	0.2332
																										R-HSA-1502540		0.1187		0	0	39.7	0	0	0	0	0	0	0	0	0	23.4	9.3	0	0	0	0	22.6	0
																										R-HSA-1538133	0.1187	0.2512		0	0	51.7	0	0	0	0	0	0	0	0	4.4	43.9	0	0	0	0	0	0	0
																										R-HSA-156580	0.2512
																										R-HSA-156581		0.3607		0	0	50.8	0	7.9	1.2	0	0	0	0	0	13.5	26.6	0	0	0	0	0	0	0
																										R-HSA-156584	0.3607	0.2662		1.3	0	38.1	0	0	0	1.6	0	0	8.5	15.6	3.5	10.5	1.2	0	0	4.9	0	4.5	0
																										R-HSA-156590	0.2662	0.1804		0	0.9	33.1	1.8	29.7	2.8	0	0	8.5	4.5	0	9	0	0	4.4	1	2.6	0	1.7	0
																										R-HSA-1566948	0.1804		0.1852	0	0	0	0	35	0	0	0	0	3.7	2.5	0	44.2	0	0	0	0	0	0	0
																										R-HSA-156711	0.1852	0.1041		4.8	0	25	1	10.5	7.7	0	0	11.2	8.9	0	0	15.8	0	5.2	0	5.5	0	4.4	0
																										R-HSA-156827	0.1041	0.2762		0	0	42.2	0	15.8	0	6	0	0	0	8.8	12.6	0	0	1.2	0	0	1.6	0	0
																										R-HSA-156842	0.2762	0.2269		0	0	40.5	0	13.2	0.9	6.2	0	0	0	11.2	11.6	0	0	1.3	0	0	2	0	0
																										R-HSA-156902	0.2269	0.2276		0	0	40.7	0	13.3	0.8	6.1	0	0	0	11	11.8	0	0	1.3	0	0	1.8	0	0
																										R-HSA-157118	0.2276
																										R-HSA-157579
																										R-HSA-157858
																										R-HSA-15869			0.2658	0.4	0	19.1	0	17.2	6.4	0	0	12.3	8.6	0	0	25.4	0	5.5	0	0	5.1	0	0
																										R-HSA-1592230	0.2658	0.3066		2.3	5.2	34.4	2.8	13.9	0.1	2.5	2.1	0	5.7	0	8.1	6.2	2.2	0.7	0	0	1	2.7	2.6
																										R-HSA-159227	0.3066		0.1833	0	0	35	0	1.7	9.5	0	0	1.8	4.7	0	10.5	28.5	0	6.3	0	0	1.1	0.9	0
																										R-HSA-159230	0.1833		0.1862	0	0	34.7	0	1.5	9.8	0	0	2.1	5.4	0	9.8	28.8	0	6.1	0	0	0.6	1.3	0
																										R-HSA-159231	0.1862		0.203	0	0	38.7	0	0	8.1	0	0	0.8	4.1	0	12.4	28.7	0	5.6	0	0	0	1.6	0
																										R-HSA-159234	0.203	0.2049		0	0	37.9	0	0	8.4	0.2	0	1.4	4.8	0	11.5	28.2	0	5.5	0	0	0	2	0
																										R-HSA-159236	0.2049		0.2755	0	0	45	0	0	0	0	0	0	0	0	13.5	35.2	0	6.4	0	0	0	0	0
																										R-HSA-1592389	0.2755		0.2532	1.1	0	45.7	0	0	0	0	0	6.4	7.5	0	2.1	27.6	0	2.8	0	0	0	6.8	0
																										R-HSA-1606322	0.2532
																										R-HSA-1614558			0.2174	0	0.4	30.8	2.8	0	13.1	0	0	16.6	13.2	1.3	0	8	0	4.3	3.4	0	0	6.2	0
																										R-HSA-1614635	0.2174		0.1373	2.2	1.3	12.4	3.6	1.6	13.5	5.2	0	13.1	10.4	3.9	11.8	6.3	2.4	4.7	3.1	0	0	4.6	0
																										R-HSA-162582	0.1373	0.203		1.8	2.3	27.1	2.2	22.9	11.6	2.1	4.1	9.6	3	6.1	5.1	0	0	1.4	0	0.3	0.3	0	0
																										R-HSA-162587	0.203	0.2935		0	0	41.6	2.2	0	2.3	4	0	0	7.6	0	20.7	17.5	0	0.4	0	0	0	0	0
																										R-HSA-162588	0.2935
																										R-HSA-162594		0.3403		0	1.5	47.7	0	11.8	0	0	0	0	8.9	0	12.4	16.1	0	0	0	1.5	0	0	0
																										R-HSA-162599	0.3403	0.2849		0	0	37.2	4.1	0	6.1	3.5	0	0	6.5	0	21.5	15.7	0	1.3	0	0	0	0	0
																										R-HSA-162658	0.2849	0.2508		0	1.4	49.3	0	0	0	3.5	0	0	0	3.1	11.6	23.3	0	7.7	0	0	0	0	0
																										R-HSA-162710	0.2508	0.1613		0	2.7	25.7	0	7.4	1.7	1.6	10.6	0.6	1.6	17.9	1.1	8.6	1.8	1.2	0	0	0.6	2.4	6.4
																										R-HSA-162906	0.1613	0.2851		0	2	40.8	4	11	0	1.4	0	4	4.3	0	15.5	13	0	0	0	4	0	0	0
																										R-HSA-162909	0.2851	0.3453		0	2.2	44.4	2	12.6	0	0.7	0	2.8	2.8	0	14.2	15.1	0	0	0	3.3	0	0	0
																										R-HSA-1630316	0.3453	0.2983		0	0	48.2	0	0	0	0	0	0	6.1	0	27.5	11.6	0	0.7	0	0	0	0	0
																										R-HSA-163125	0.2983		0.3096	4	0	50.1	0	0	0.3	0	0	2.4	10.3	0	12.6	18.9	0	1.3	0	0	0	0	0
																										R-HSA-163200	0.3096	0.1133		0	0	40.9	7.5	29.7	0	0	0	0.7	0	0	1	0	0	0	0	0	3.7	0	0
																										R-HSA-163210	0.1133	0.1756		0	0	43.5	5.5	29	0	0	0	0	0	1	3.9	0	0	0	0	0	3.4	0	0
																										R-HSA-1632852	0.1756
																										R-HSA-163359		0.1704		2.7	0	22.6	3	11.6	0	0.3	0.8	17.5	0	10.2	19.2	5.3	0	1.9	0	2.9	0	2	0
																										R-HSA-163560	0.1704
																										R-HSA-163615		0.1304		2.2	2.3	18.1	3.2	3.4	3.6	2.5	4.2	18.8	5.8	13.9	0.9	6.8	4.1	3.6	3.6	0	0	2.9	0
																										R-HSA-163685	0.1304	0.1589		0	0	28.3	5.4	5.9	3.7	0	3	11.2	0	5.7	20.6	11.6	0	0	0	4.5	0	0	0
																										R-HSA-1638074	0.1589		0.1916	0	0	45.8	0	0	0	0	0	0	9.6	0	31.7	12.9	0	0	0	0	0	0	0
																										R-HSA-1638091	0.1916		0.1195	0	0	17.6	0	19.9	0	0	0	0	1	0	13.2	40.4	0	0.4	0	0	0	0	0
																										R-HSA-163841	0.1195	0.1813		0	5	30.9	1.5	24.8	0	7.5	1.7	2.5	0	3.9	6.3	2.8	0	1.1	0	4.6	0	1.8	0.4
																										R-HSA-1640170	0.1813	0.3046		0	0	38.9	0	6.9	0	0	0	5	12.1	0	0	27.5	0	0	0	0	0	9.7	0
																										R-HSA-1643685	0.3046	0.3091		0	1.7	36.7	0	19.5	5.5	3.9	0	0	0	0	14.6	1.7	0	1.7	0	0	2.8	0	0.7
																										R-HSA-1643713	0.3091	0.1803		0	0	7.4	3.5	19.3	7.1	0.8	0	10.4	6.3	3.7	0	19.8	5.9	5.7	0	2.4	0	7.6	0
																										R-HSA-164378	0.1803
																										R-HSA-164938		0.3715		0	5.5	36.9	0.2	16.3	0	2.3	0	6.3	3.2	0	11.3	11.8	0.8	1.3	0	3.9	0	0.2	0
																										R-HSA-164952	0.3715	0.3575		0	3.5	44.8	0	13	0	3.4	0	0	4	0	9.5	16.9	0	0	0	4.3	0	0.7	0
																										R-HSA-165054	0.3575		0.2342	0	0	40.4	0	0	7.5	0	0	1.6	4.9	0	11.4	27.7	0	4.5	0	0	0	2	0
																										R-HSA-1650814	0.2342	0.1745		0	3.2	32.1	0.1	40.3	0.7	2.7	2.4	1.3	0	0	0	5.1	0	4.9	0	0	4.2	3	0
																										R-HSA-165159	0.1745
																										R-HSA-1655829
																										R-HSA-166016			0.3298	0.5	3.5	34.9	5.8	0	2	0	0	0	7	0	21.5	9.5	0	0	0	2.1	0	3.1	2.7
																										R-HSA-1660499	0.3298	0.1801		0	0	14.3	1.8	21.9	9.8	3.2	4	15.5	4.9	6.9	0.3	4.8	0	0	0	2.9	3.9	5.8	0
																										R-HSA-1660514	0.1801		0.1163	10	3.9	23.4	0	1.9	8	0	0	9.9	10.2	0	0	12.4	0	5.8	0	0	1.9	6.4	0
																										R-HSA-1660516	0.1163
																										R-HSA-1660517
																										R-HSA-166058			0.3264	0	3.5	40.4	3.9	0	0	0	0	0	9.7	0	19.4	14	0	0	0	1.6	0	0	0.9
																										R-HSA-1660661	0.3264
																										R-HSA-1660662		0.1951		0	1.9	31.5	0	41.7	0	2.1	0	2	0	0	0	11	0	4.4	0	1.4	0	0.1	4
																										R-HSA-166166	0.1951		0.2936	0	3.9	37.4	5.7	0	0	0	0	0	6.3	0	20.8	10.1	0.8	0.2	0	0	0	3.8	2.5
																										R-HSA-166208	0.2936
																										R-HSA-166520
																										R-HSA-166658
																										R-HSA-166663
																										R-HSA-166786
																										R-HSA-167044		0.2234		4.4	0	34.4	1.7	16.7	0	8.5	2.2	0	1.1	12.1	11.5	0	0	0	0	0	0	7.3	0
																										R-HSA-167152	0.2234	0.2163		0	0	44.6	3.5	0	0	1.1	0	0	10.8	0	22.7	15.1	2	0	0	0	0	0	0
																										R-HSA-167158	0.2163	0.1046		1.3	0.7	27.5	9.2	13.8	0	2.5	0.2	9.2	3.9	4.5	15.7	0	3.6	0	0	5.3	0	2.6	0
																										R-HSA-167160	0.1046	0.215		1.1	2.6	32	5	9.1	4.2	2	0	3.7	7.1	5.2	17.6	3.1	2	1.4	0	1.5	0	2.2	0
																										R-HSA-167161	0.215
																										R-HSA-167162
																										R-HSA-167169		0.1511		0	0	39.2	6.7	3	0	3	0	0	8.4	4.9	20.3	3.6	5.2	0	0	5.8	0	0	0
																										R-HSA-167172	0.1511	0.1781		0	0	38.6	7.4	0	3.3	1.2	0	0	13.8	0	22.8	10.3	2.6	0	0	0	0	0	0
																										R-HSA-167200	0.1781	0.1511		0	0	39.2	6.7	3	0	3	0	0	8.4	4.9	20.3	3.6	5.2	0	0	5.8	0	0	0
																										R-HSA-167238	0.1511	0.1695		0	0	41.6	4.2	0	0	2.6	0	0	7.7	5.8	21.3	5.6	6.5	0	0	4.7	0	0	0
																										R-HSA-167242	0.1695	0.1024		0.4	0	27.6	8.9	13.9	0	3.2	0	9.1	2.1	6	14.5	0	4.2	0	0	4.7	0	5.4	0
																										R-HSA-167243	0.1024	0.1695		0	0	41.6	4.2	0	0	2.6	0	0	7.7	5.8	21.3	5.6	6.5	0	0	4.7	0	0	0
																										R-HSA-167246	0.1695	0.1511		0	0	39.2	6.7	3	0	3	0	0	8.4	4.9	20.3	3.6	5.2	0	0	5.8	0	0	0
																										R-HSA-167287	0.1511	0.2055		0	0	40.9	4.3	0	0	3	0	0	11.2	2.4	22.1	8.1	5.6	0	0	2.4	0	0	0
																										R-HSA-167290	0.2055	0.2055		0	0	40.9	4.3	0	0	3	0	0	11.2	2.4	22.1	8.1	5.6	0	0	2.4	0	0	0
																										R-HSA-1679131	0.2055	0.3076		0	1.4	9.2	0	36.4	6.9	0	0	12.3	5.5	0	0.6	16	2.1	5.4	0	0	0	4.2	0
																										R-HSA-168138	0.3076		0.2959	0	4.4	41.3	3.5	0	0	0	0	0	8.3	0	21.7	12.7	0	0	0	0.2	0	1.2	0.6
																										R-HSA-168142	0.2959	0.2676		0	4.1	40.9	3.4	0	0	0	0	0	6.2	0	23.4	9.9	0	0	0	0	0	3.7	0.1
																										R-HSA-168164	0.2676		0.2395	0	3	38.1	6.3	0	0	0	0	0	3.9	0	22	8.5	0	0	0	0	0	5.4	2.2
																										R-HSA-168176	0.2395	0.2676		0	4.1	40.9	3.4	0	0	0	0	0	6.2	0	23.4	9.9	0	0	0	0	0	3.7	0.1
																										R-HSA-168179	0.2676		0.3264	0	3.5	40.4	3.9	0	0	0	0	0	9.7	0	19.4	14	0	0	0	1.6	0	0	0.9
																										R-HSA-168181	0.3264		0.301	0	4	42.3	3.2	0	0	0	0	0	8.3	0	21.7	13.7	0	0	0	0	0	0.2	0.2
																										R-HSA-168188	0.301		0.3264	0	3.5	40.4	3.9	0	0	0	0	0	9.7	0	19.4	14	0	0	0	1.6	0	0	0.9
																										R-HSA-168249	0.3264		0.2534	0	0	30.2	0	6.6	8.7	0	0	8.2	9.9	0	9.6	19.4	0	1.5	0	0	0	5.9	0
																										R-HSA-168253	0.2534	0.1251		5.7	0	32.5	0	11.4	2.5	0	0	0.3	0	0	10.4	32.3	0	0	0	0	0	0	0
																										R-HSA-168254	0.1251	0.2714		0	0	40.1	0	12.8	2.4	4.7	0	0	0	8.1	14.9	0	0	2.2	0	0	1.6	0	0
																										R-HSA-168255	0.2714	0.2628		0	0	40.7	0	11.9	2.2	5.4	0	0	0	8.2	15.6	0	0	2.9	0	0	1.3	0	0
																										R-HSA-168256	0.2628		0.2306	0	0	25.3	0	0	20.8	0	0	11.2	8.6	0	10.8	12.4	0	2.4	3.4	0	0	5.2	0
																										R-HSA-168271	0.2306	0.15		4.1	0	17.2	0	15.5	12.5	0	0	6.7	4.6	0	2.6	27.3	0	6.8	0	0	0.4	2.1	0
																										R-HSA-168273	0.15	0.2404		0	0	42.1	0	10.1	1	6.4	0	0	0	9.6	16.2	0	0	2.8	0	0	0.8	0	0
																										R-HSA-168274	0.2404	0.2275		0	0	34.8	0	2.4	12.7	0	0	2.5	6.6	0	12.6	23.3	0	5.1	0	0	0	0	0
																										R-HSA-168276	0.2275
																										R-HSA-168325			0.2271	1.7	0	30.7	0	3.8	12.9	0.5	0	4.2	6.7	0	11.6	21.3	0	6.5	0	0	0	0	0
																										R-HSA-168333	0.2271		0.2183	0	0	39.6	0	0.1	7.8	0	0	2.6	5.1	0	9.3	28.1	0	4.5	0	0	0	2.9	0
																										R-HSA-168638	0.2183
																										R-HSA-168643		0.1646		0	4.5	30.1	1.8	0	0	7	0	0.3	16.6	0	11.5	3.5	8.5	0	0	0	0	0	6.2
																										R-HSA-168898	0.1646		0.3387	1.1	3.6	33.5	5.7	0	3.5	0	0	0	8	0	20.7	10.1	0	0.1	0	1.6	0	2.8	2.6
																										R-HSA-168927	0.3387
																										R-HSA-168928
																										R-HSA-169893		0.1004		7.1	0	8.6	2.7	10.5	10.3	0	0	16.6	6.7	2.2	17.9	7.8	3.1	2.7	2.4	0	0	1.5	0
																										R-HSA-169911	0.1004
																										R-HSA-170670
																										R-HSA-170822			0.1784	1.9	0	25.1	0	8.8	12.8	0.1	0	5.4	5.4	0	8.3	23.6	0	6.6	0	0	0.8	1.2	0
																										R-HSA-170834	0.1784		0.2026	2.6	0.7	10	4.3	25.8	11.5	0	6.1	13	6.4	0.2	0.7	3.6	2.9	1.7	1.2	0.8	5.1	3.4	0
																										R-HSA-170968	0.2026	0.1804		0.1	0.7	0	3.9	13.8	18.2	0	0	23.2	13.9	0	9.4	8.3	0	1.6	3.7	0	0	3.3	0
																										R-HSA-170984	0.1804
																										R-HSA-171007			0.3076	5.9	2.5	29.7	1.6	14.5	1.9	4.7	3.2	1.4	6.9	3.7	17.4	3.6	0	0.9	0	0	0	2.2	0
																										R-HSA-171306	0.3076
																										R-HSA-173623
																										R-HSA-174048
																										R-HSA-174084
																										R-HSA-174113
																										R-HSA-174143
																										R-HSA-174154
																										R-HSA-174178
																										R-HSA-174184
																										R-HSA-174403		0.2535		0	0	34.6	4.3	16.5	10.2	0	0	6.9	1.8	5.2	0	3.8	3.6	0	0	0	0	3.6	0.1
																										R-HSA-174411	0.2535
																										R-HSA-174414		0.2928		0	2.2	35.2	6.1	0	0	3.1	0	0	11.6	5	19.3	4.6	0	0	0	5.5	0	0	0
																										R-HSA-174417	0.2928	0.3417		0	2.7	36.7	5.1	0	0	3.1	0	0	11.8	4.1	16.3	8.6	0	0.8	0	3.8	0	0	0
																										R-HSA-174437	0.3417	0.2882		0	2.3	34.9	6.4	0	0	3.4	0	0	11.6	5.3	18.4	4.8	0	0	0	5.5	0	0	0
																										R-HSA-174490	0.2882
																										R-HSA-174495
																										R-HSA-174824		0.1208		0	6.1	29.2	9.5	29.4	0	1.7	0	0	0	0	5.4	0	4.5	4.1	0	0.8	0	4.6	0.6
																										R-HSA-175474	0.1208
																										R-HSA-176033			0.2943	0	0.2	34.8	0	0	11.1	2.1	0	0	5.2	0	17.7	20.4	0	4	0	0	0	0	0
																										R-HSA-176187	0.2943		0.3533	0	0	44.4	0.2	0	0	0	0	0	10.4	0	15.8	22.9	0	0.2	0	0	0	0	0
																										R-HSA-176407	0.3533
																										R-HSA-176408
																										R-HSA-176409
																										R-HSA-176412
																										R-HSA-176814
																										R-HSA-176974		0.2196		0.9	0.7	39.6	4.2	0	0	1.4	0	0	5.2	0	20.9	8.2	5.4	3.6	0	6.5	0	0	0
																										R-HSA-177243	0.2196		0.2148	0	0	36	0	1.2	9	0	0	1.5	3.8	0	11.8	26	0	4.9	0	0	0	1.7	0
																										R-HSA-177504	0.2148	0.1761		0	9	39.2	6.6	26.8	0	4.2	0	0	0	0	7.4	0	0	0	0	0.8	0	6.1	0
																										R-HSA-177929	0.1761	0.1316		2.8	0.3	0.7	4.2	20.2	9.3	4.3	0	15	7.6	8.1	0	10.9	4.8	3.5	0	1.5	0	6.9	0
																										R-HSA-1793185	0.1316	0.2438		0	0	47.5	2.7	0	0	0	0	0	3.3	4	26.1	6.3	2.3	0.3	0	2.7	0	0	0
																										R-HSA-179409	0.2438
																										R-HSA-179419
																										R-HSA-1799339		0.2258		0	0	43.1	0	14.6	0	5.7	0	0	0	9.6	12.9	0	0	0.5	0	0	1.7	0	0
																										R-HSA-180024	0.2258	0.1856		0	0	3.2	2.3	16.1	2.1	0	5.6	17.3	14.6	14	5.8	1.9	0.6	0	0	0	0	16.5	0
																										R-HSA-180292	0.1856	0.161		4.7	0	0	3.9	32.3	8.5	0	0	19.6	12.3	0	0	8.5	0	1.8	0	0	0	8.3	0
																										R-HSA-180336	0.161	0.1299		3.2	0.2	10.5	4	13.6	0	5.1	1.8	7.1	0.7	10.7	7.1	11.6	5.5	0	0	0	0	11.3	2.6
																										R-HSA-180534	0.1299
																										R-HSA-180585
																										R-HSA-180746			0.2466	0	0	38.4	0	0	8.1	0	0	0	2.7	0	15	24.9	0	5	0	0	0	0.2	0
																										R-HSA-180786	0.2466	0.3049		0	0	38	6.4	0	0	3.3	0	0	9.6	4.4	16.2	10.8	0	0	0	4.3	0	0	0
																										R-HSA-180910	0.3049		0.211	0.2	0	26.2	0	7.3	13.8	0	0	3.4	6.5	0	12.6	24.7	0	3.7	0	0	0	1.7	0
																										R-HSA-1810476	0.211
																										R-HSA-181429		0.1773		16.5	0.9	19.5	0	14.8	10.7	0	0.6	0	3.5	0	16.8	0	14.2	1.7	0	0	1	0	0
																										R-HSA-181430	0.1773	0.1783		16.3	0.8	20.1	0	15.1	10.6	0	0.5	0	3.3	0	16.5	0	14.2	1.8	0	0	0.8	0	0
																										R-HSA-181438	0.1783		0.3264	0	3.5	40.4	3.9	0	0	0	0	0	9.7	0	19.4	14	0	0	0	1.6	0	0	0.9
																										R-HSA-182971	0.3264	0.1857		0	1.5	28.2	0	23.8	4.8	0	0	12.6	0	0	15.3	0	0	3.9	0	8.1	0	0	0
																										R-HSA-1834941	0.1857
																										R-HSA-1834949
																										R-HSA-1839117
																										R-HSA-1839124
																										R-HSA-1839126		0.1842		0	0	43.9	4.8	10	0	3.6	0	0	8.1	4.6	14.2	9.2	0	0	0	1.7	0	0	0
																										R-HSA-1852241	0.1842	0.2554		6.9	0	43.9	3.3	7.1	0.6	1.6	0	0	6.8	0	6	10.7	0	2.5	0	0	1.1	3.5	1.1
																										R-HSA-1855183	0.2554	0.1197		0	0	0	2.3	27.3	10	0	0	18.7	4.5	1.1	0	26.7	0	0	5	0	0	4.5	0
																										R-HSA-1855204	0.1197
																										R-HSA-186712
																										R-HSA-186763
																										R-HSA-186797
																										R-HSA-187037
																										R-HSA-187577
																										R-HSA-187687		0.1482		8.7	0.6	23.4	2.6	16	1.7	0.2	0	10.5	0	5.9	20.2	5.3	0.2	0.6	0	0.3	0	3.6	0
																										R-HSA-189200	0.1482	0.2179		0	1.3	47.5	0	20.5	0	2.1	0	0	7.8	0.6	19	0	0	1.2	0	0.1	0	0	0
																										R-HSA-189445	0.2179
																										R-HSA-189451
																										R-HSA-190236			0.2731	0	0	30.2	0.2	5.3	6.9	0	0	11.1	10.9	0	0	25	0	3	0	0	0.4	7	0
																										R-HSA-190828	0.2731
																										R-HSA-190840
																										R-HSA-190861
																										R-HSA-190872
																										R-HSA-190873
																										R-HSA-1912408		0.1495		0	0	47.9	0	31.6	10.9	0	0	0	0	5	0	0	0	0	0	4.6	0	0	0
																										R-HSA-1912420	0.1495
																										R-HSA-1912422		0.1166		0	0	42.1	0	27.5	15.8	0	0	2.3	0	4.6	0	0	0	0	0	5.5	0	0	0
																										R-HSA-191273	0.1166	0.226		7.2	0	18.8	4.8	8	2.6	0.7	2	9.6	4.5	3.7	17	5.2	2.1	0.9	0	0	6.1	6.8	0
																										R-HSA-191859	0.226	0.2752		0	0	38.8	0.4	0	6.1	3.6	1.1	0	5	0	18	18.8	0	3.2	0	0	0	0	0
																										R-HSA-192105	0.2752
																										R-HSA-192823		0.2142		0	0	41.6	0	12.7	0	6.5	0	0	0	11.5	11.8	0	0	1.1	0	0	1.7	0	0
																										R-HSA-193368	0.2142
																										R-HSA-193639
																										R-HSA-193648
																										R-HSA-193692			0.1209	0	6.9	7.2	0	10.3	11.1	4.8	0	19.1	11.9	0	0	11.6	0	1.3	7.1	0	0	3.6	0
																										R-HSA-193704	0.1209
																										R-HSA-194068
																										R-HSA-194138
																										R-HSA-194315		0.1222		1.2	3	23.6	2.6	11.7	7.2	4.5	6.1	5.2	2.6	2.6	19.9	0	0	0	0	0	0	0.7	0.7
																										R-HSA-194441	0.1222	0.2752		0	0	38.8	0.4	0	6.1	3.6	1.1	0	5	0	18	18.8	0	3.2	0	0	0	0	0
																										R-HSA-194840	0.2752	0.1082		0	0	45.7	0	0	13.3	0	0.1	0	0	0	0	25.2	0	0	0	0	0	15.7	0
																										R-HSA-195253	0.1082
																										R-HSA-195258
																										R-HSA-195721
																										R-HSA-196025
																										R-HSA-196071		0.1063		0	0	55.3	0	0	0	0	0.6	0	0	9.1	5.4	22.1	0	7.5	0	0	0	0	0
																										R-HSA-196299	0.1063	0.3183		0	1.4	29.7	4.4	20.2	0.5	0.8	0	7.3	0.7	7.2	13.8	7.1	0.1	0	1.8	0	0	5.1	0
																										R-HSA-1963640	0.3183
																										R-HSA-1963642			0.1582	0	0	0	0	22.5	10	0	0	17.4	16.5	3.8	0	8.5	0	0.8	0	1	0	19.4	0
																										R-HSA-196741	0.1582
																										R-HSA-196757			0.1624	0	0	42.7	0	0	0	0	0	17.8	26.3	0	0	13.1	0	0	0	0	0	0	0
																										R-HSA-196780	0.1624	0.1394		0	0	46.6	0	0	3.5	0	0	0	0	0	4.8	45.1	0	0	0	0	0	0	0
																										R-HSA-196807	0.1394	0.2234		0	3.7	34.2	0	11.4	11.8	3.6	0.9	6.8	11.1	4.6	10.3	0	0	0.9	0.7	0	0	0	0
																										R-HSA-196849	0.2234	0.3244		0	0	42.5	0.8	8.1	5.9	4.7	0	2.5	12.2	7.5	11.7	0	0.1	3.6	0	0	0	0.4	0
																										R-HSA-196854	0.3244		0.3256	0	0	37.2	2.9	0	9.2	3.1	0	2.8	14	7.1	17.7	0	2	4.1	0	0	0	0	0
																										R-HSA-1971475	0.3256
																										R-HSA-197264
																										R-HSA-1980143
																										R-HSA-1980145
																										R-HSA-198203		0.2239		0	0	25.8	0	1.4	20.9	0	0	17.3	0	12	5.2	2.2	0	0	0	0	0	7.5	2.5
																										R-HSA-198323	0.2239
																										R-HSA-198725		0.2596		2.2	3.2	40.1	2.1	0	0	0	0	0	0	0	28.7	10.2	0	0	4.1	0	0	2.2	0
																										R-HSA-198753	0.2596		0.2474	3.1	5.6	35.3	3.7	0	1.5	0	0	0	4.4	0	24	11.7	0	0.3	3.9	0	0	0	0
																										R-HSA-198933	0.2474
																										R-HSA-1989781
																										R-HSA-199220		0.2152		0	0	47.9	0	0	0	3.3	0	0	1.5	8.9	23.5	0	0	0	0	0.7	0	8.8	0
																										R-HSA-199418	0.2152	0.2784		0	0	23.4	0	25.7	7.9	0	2.2	11.1	10.1	10.5	0	3	0	0	0	0	0	6.2	0
																										R-HSA-199977	0.2784
																										R-HSA-199991
																										R-HSA-199992		0.217		0	0	38.6	0	38.9	3.3	0	0.5	1.1	3.5	0	0	14.1	0	0	0	0	0	0	0
																										R-HSA-200425	0.217		0.1257	1.4	0	16.5	1.9	17.7	0	0	0	7.1	12.4	0	0	17.3	2.2	7.7	0	0	0	15.9	0
																										R-HSA-201451	0.1257	0.2356		0	0	36.9	7	23.8	0	2.5	0	2.9	0.5	7.2	7.2	0	0	0	0	3.1	0	9	0
																										R-HSA-201681	0.2356
																										R-HSA-201722		0.1425		6	0	0	0	26.4	9.2	5.9	0	0	0	0	33.2	0	0	4.5	0	1.9	0	3	0
																										R-HSA-202040	0.1425	0.3246		0	0	45	0.6	12.2	0	1.6	0	2.6	0	4.1	17.6	13.5	0	0	0	0	0	2.8	0
																										R-HSA-202131	0.3246	0.1115		0	3	26.3	1.3	0	9.2	0.4	7.1	0	9.8	0	26	0	0	0	0	9.7	0	0	5.3
																										R-HSA-2022090	0.1115		0.115	0	1.9	0	0	18.9	0	12.8	0	9.3	17.3	0	0	2.8	7.3	7.1	0	0	0	8	5.5
																										R-HSA-2022377	0.115		0.2107	0	4.9	0	0	34.3	0	0	0	8.9	6.1	0	3.8	10.4	0	10.6	0	0	0	9.4	0
																										R-HSA-2022854	0.2107	0.3493		0	4	43.5	0	26.3	0.6	1.2	0	6.4	2.2	0	15.3	0.5	0	0	0	0	0	0	0
																										R-HSA-2022870	0.3493	0.2931		0	0	49.6	2	12.4	0.6	0	0	0	7.8	0.4	21.1	2.1	0.5	0	0	3.5	0	0	0
																										R-HSA-2022928	0.2931		0.1585	0	0	38.5	0	0	0	0	0	2.1	11.6	5.7	16.9	18.1	0	7.2	0	0	0	0	0
																										R-HSA-202403	0.1585	0.2125		0	0	52.6	0	0	0	0	0	0	2.6	4	17.8	18.2	0	0	0	4.9	0	0	0
																										R-HSA-2024096	0.2125	0.1594		0	0	0	0	39.4	0	0	1.7	0	0	0	4.2	37.1	0	0	0	0	0	0	10
																										R-HSA-202424	0.1594	0.1856		0	0	45.2	4.1	13.7	2.4	0	0	2.3	4.2	5.4	10.1	7.2	0	0	0	5.3	0	0	0
																										R-HSA-202427	0.1856	0.3506		0	0	45.9	1.6	0	0	0	0	0	12.4	17.6	0	13.3	0.3	0	0	2.6	0	0	0
																										R-HSA-202430	0.3506	0.3236		0	0	43.1	3	0.8	0	0	0	0	11	14.7	3.5	10.5	1.9	0	0	4.3	0	0	0
																										R-HSA-202433	0.3236	0.3304		0	0	43.3	1	0	0	0	0	0	9.1	8.9	11	13.4	0.8	0	0	6.9	0	0.3	0
																										R-HSA-2025928	0.3304		0.3055	0	1.5	22.2	0	14.6	3.2	0.8	0	16.3	15.7	1.1	0	15.1	0	0	0	0	1.1	7.3	0
																										R-HSA-202670	0.3055		0.1533	0	0	0	0	34.1	12.1	0	0	14.6	1.7	3.5	12.7	11.5	0	2.4	0	0	0	0	0
																										R-HSA-202733	0.1533	0.1255		0	4.9	41.1	4.4	0	0.2	0	0	0	0	21.2	7.9	0	0	5.9	0	0	0	0	5
																										R-HSA-2028269	0.1255
																										R-HSA-2029480
																										R-HSA-2029481
																										R-HSA-2029482
																										R-HSA-2029485
																										R-HSA-203927
																										R-HSA-204005
																										R-HSA-204174
																										R-HSA-2046104		0.2926		0	6.1	42.4	0	2.1	0	1.3	0	3.9	5.1	0	9.1	21.6	6.6	1.7	0	0	0	0	0
																										R-HSA-2046106	0.2926	0.2926		0	6.1	42.4	0	2.1	0	1.3	0	3.9	5.1	0	9.1	21.6	6.6	1.7	0	0	0	0	0
																										R-HSA-204998	0.2926
																										R-HSA-205043
																										R-HSA-209543
																										R-HSA-209560
																										R-HSA-210500		0.2003		0	0	26	3.6	4.3	6.2	0	0	9	8.1	0	0	33.4	0	0	0	0	0	9.3	0
																										R-HSA-210744	0.2003
																										R-HSA-210990		0.3345		0	0	41.1	0.5	0	4.2	0.2	0.8	2.8	7.4	0	16	17.1	0	7.3	0	0	0	2.7	0
																										R-HSA-210991	0.3345	0.4231		0	2.9	49.7	0	21.9	0	0	2.6	0	2.3	0	11.6	5	0	0	0	0	0	2.2	0
																										R-HSA-210993	0.4231	0.1069		2.9	0	8.4	2.1	17.9	0	0	0	11.9	8.3	10.8	0	15.6	0	0	0	0	0	22.1	0
																										R-HSA-211000	0.1069		0.1889	1.9	0	12.7	0	17.9	12.1	0	0	9.4	11.2	0	0	20.9	0	7.1	0	0	0	6.8	0
																										R-HSA-211733	0.1889
																										R-HSA-211859			0.2868	0	0	0	0	38.3	0	0	0	10.1	16	0	0	15.9	0	7.8	0	0	0	0	0
																										R-HSA-211897	0.2868		0.1306	0	0	46	3.3	0	0	0	0	0	0.3	0	27.5	11.9	0	7.1	0	0	0	0	0
																										R-HSA-211945	0.1306		0.2788	0	1.2	0	0	37.2	0	0	0	8.3	7.6	1.3	0.9	20.9	3	8.6	0	0	0	0	0
																										R-HSA-211976	0.2788
																										R-HSA-212165			0.139	0	0	12.5	0	28.4	0.2	0	0	7.7	17.7	0	0	21.4	0	0	0	0	0	12.1	0
																										R-HSA-2122947	0.139
																										R-HSA-2122948
																										R-HSA-212300
																										R-HSA-212436			0.3032	0	0	3.2	0	26.8	13.4	0	0	13.8	13.4	0	0.2	16.4	0	2.7	0	0	0	10.1	0
																										R-HSA-212676	0.3032	0.3786		3.3	0	47.6	2.7	24.4	4.2	0	0	0.1	0.3	5.5	0	4.3	7.1	0	0	0	0.5	0	0
																										R-HSA-2129379	0.3786		0.2018	0	0	13.2	0	36.1	0	0	0	0	4.5	4.3	0	27	0	0	0	0	0	0	0
																										R-HSA-2132295	0.2018	0.2361		0	0	47.4	0.8	31.8	1.6	0	0	3.8	0	8.7	0	0.7	0	2.7	0	2.4	0	0	0
																										R-HSA-2142691	0.2361	0.2376		6.6	0	49.1	0	0	0	0	0	11.4	9.5	0	8.4	10	0	1.6	0	0	0	3.5	0
																										R-HSA-2142753	0.2376	0.1862		2	0	42.9	0	0	0	0	0	8.8	10.7	0	0	31.3	0	0	0	0	0	4.3	0
																										R-HSA-2142845	0.1862	0.1963		0	0	0	0	42.5	0	0	0.7	16.4	7.3	7	3.8	12.2	0	5.3	0	0	0	0	0
																										R-HSA-2151201	0.1963	0.1014		8.1	4.3	22.1	2.3	7.4	11.5	0	0	6.3	11.7	0	0	15.4	0	0	0	0	0	10.9	0
																										R-HSA-216083	0.1014	0.1036		0.9	0	29.2	0	0	11.8	0	11.3	17.8	10.7	9.7	0	0	0	0.7	0	0	0	0	0
																										R-HSA-2160916	0.1036		0.2376	0	0	11.5	0	43.8	0	0	2.3	15.8	5.7	1.5	0	10.8	1.9	6.8	0	0	0	0	0
																										R-HSA-2162123	0.2376	0.1296		0	0	33.7	0	0	0	0	4	0	0	0	1.1	61.1	0	0	0	0	0	0	0
																										R-HSA-2168880	0.1296
																										R-HSA-2172127		0.2182		4.4	3.3	21.7	5.1	0	3	0	4.6	10.7	14.8	0	5.1	7.8	0	3.6	0	0	11.5	4.5	0
																										R-HSA-2173782	0.2182	0.1117		1	5.3	28.6	2.1	12.5	10.3	6.8	2.3	0	3.3	10.7	5.3	8.2	0	0	3.7	0	0	0	0
																										R-HSA-2173788	0.1117		0.2521	0	0	11.1	2.1	19.7	14.1	0	4.9	18.4	12.4	0.4	0	7.7	0	0.6	8.6	0	0	0	0
																										R-HSA-2173789	0.2521	0.1707		0	0	0	2.4	24.1	15.1	0	9.9	19.5	10.3	0.9	5.9	1	0	0.7	10.1	0	0	0	0
																										R-HSA-2173791	0.1707
																										R-HSA-2173793		0.1911		0	0	0	3.3	32.3	9.5	0	0.7	14	7.9	0	0	13.8	0	5.4	2.4	2.8	0	7.9	0
																										R-HSA-2173795	0.1911		0.203	0	0	0	4.5	32.3	8.2	0	0.7	14.5	7.1	0.1	0	12.9	0	6.4	1.4	4.9	0	7.1	0
																										R-HSA-2173796	0.203		0.2627	0	0	14.5	0	21.8	13.1	0	4	5.1	4.6	0	11	16.9	0	6.7	2.4	0	0	0	0
																										R-HSA-2187338	0.2627	0.2604		0	2.7	47.2	0	19.1	3.2	1.7	0	0.4	5	0	7.8	11.5	0	0	0	1.3	0	0	0
																										R-HSA-2197563	0.2604
																										R-HSA-2206281		0.115		0	0	0	0	36	3.5	0	0	0	0.7	0	39	19.2	1.6	0	0	0	0	0	0
																										R-HSA-2219528	0.115	0.2112		0	0	27.2	1.1	25.6	15.8	0	0.7	13.7	6.6	2.6	0	0	0	0	0	1.9	0	4.9	0
																										R-HSA-2219530	0.2112
																										R-HSA-2262752
																										R-HSA-2299718		0.1236		0	4.4	28.6	0	15.2	7.6	0	3.9	0	0	2.8	15.4	5.1	5.5	0.9	0	0	2.4	8.3	0
																										R-HSA-2404192	0.1236	0.1436		0	0	36.2	0	22.6	16.9	0	0	11.8	0	4.9	0	0	0	0	0	0	0	7.5	0
																										R-HSA-2408522	0.1436	0.2376		0	0	41.9	0	14	0	6.3	0	0	0	10.4	12.5	0	0	1.3	0	0	1.8	0	0
																										R-HSA-2408557	0.2376	0.2172		0	0	41.6	0	12.4	0	6.5	0	0	0	11.7	12.2	0	0	1.1	0	0	1.7	0	0
																										R-HSA-2424491	0.2172		0.4269	0.8	1.8	26.7	3.8	1.9	2.8	0	2.1	10.3	15.3	6.8	0	17.5	0	4.6	0	0	5.6	0	0
																										R-HSA-2426168	0.4269
																										R-HSA-2428924		0.1436		0	0	36.2	0	22.6	17	0	0	11.8	0	4.9	0	0	0	0	0	0	0	7.5	0
																										R-HSA-2428928	0.1436	0.1396		0	0	36.7	0	23.4	16.2	0	0	11.3	0	4.6	0	0	0	0	0	0	0	7.9	0
																										R-HSA-2428933	0.1396
																										R-HSA-2454202
																										R-HSA-2465910
																										R-HSA-2467813		0.1527		0	0	60.6	0	0	0	0	0	0	0	0	8.4	31	0	0	0	0	0	0	0
																										R-HSA-2468052	0.1527
																										R-HSA-2470946
																										R-HSA-2500257			0.1941	6.4	0	18.8	0	15.1	8.6	0	0	10.1	10.2	3.3	0	18.7	0	2.2	0	0	0	6.6	0
																										R-HSA-2514853	0.1941	0.268		4.7	0	50.6	0	0	0	0	0	5.9	0	0	0	35.9	0	0.4	0	0	0	0	0
																										R-HSA-2514856	0.268	0.3283		0	0	49.5	0	0	0	0	0	0	6.9	0	15.3	28.4	0	0	0	0	0	0	0
																										R-HSA-2514859	0.3283	0.3242		0	0	49.3	0	0	0	0	0	0	5.9	0	15	29.8	0	0	0	0	0	0	0
																										R-HSA-2555396	0.3242	0.1371		0	0	57.3	0	0	2.6	0	0	0	0	0	8	30.1	0	0	0	0	0	2.1	0
																										R-HSA-2559580	0.1371	0.3417		0	1.9	50.6	0	25.6	2.5	0	0	0	0	3.8	9.1	6.4	0	0	0	0	0	0.1	0
																										R-HSA-2559582	0.3417	0.1792		0	0	50.5	0	12.5	0	0	0	0	0	4.1	10.6	20.5	0	1.9	0	0	0	0	0
																										R-HSA-2559583	0.1792	0.3852		0	3.4	48.2	0	27.4	2.4	0	0	0	0	3	8	5.7	0	0	0	0	0	1.9	0
																										R-HSA-2559584	0.3852	0.259		0	0	45.5	0	11	0	0	8.8	2.9	13.8	0	0	13.4	1.4	1.5	1.8	0	0	0	0
																										R-HSA-2559585	0.259	0.2112		0	2.4	31.6	4.4	20.2	10	1	0	7.2	0	4.3	5	0	0	1.4	0	4.6	0	2	0
																										R-HSA-2559586	0.2112	0.1945		0	5.1	44.8	0.1	29.4	0	0	0	0	2.8	0.8	7.1	5	3.1	0.3	0	0	0.8	0.9	0
																										R-HSA-2564830	0.1945	0.2332		3.2	2.1	26.2	3.6	15	1	0.1	0.3	3.7	1	0	15.9	3.8	1.6	1.9	0.2	8.3	5.4	0	1.8
																										R-HSA-2565942	0.2332	0.2102		2.9	0	32.8	0	2.5	16.8	0	1.8	6.1	10.9	0	0	18.5	0	3.5	0	0	0	0	4.3
																										R-HSA-2586552	0.2102	0.2705		0	0	52.4	0	16.6	6.1	0	0	0	0.5	12.9	0	11.5	0	0	0	0	0	0	0
																										R-HSA-2644602	0.2705
																										R-HSA-2644603
																										R-HSA-2644606
																										R-HSA-264870
																										R-HSA-264876		0.1342		0.7	0	16.9	3.5	19.1	1.5	3.5	1.2	4.2	4.4	10.8	0	6.7	0	1.6	0	0	0.5	11.6	4
																										R-HSA-2672351	0.1342	0.2509		0	5.3	22.4	1.3	12.6	0.1	0	5.5	4.5	0	13.1	8.6	0.2	0	2.9	0	4.8	0	0	0.8
																										R-HSA-2682334	0.2509		0.1591	0	0	40	1.2	0	0	0	0	0	1.4	4.9	29.1	2.5	0.3	11.2	0	0	0	0	0
																										R-HSA-2691230	0.1591
																										R-HSA-2691232
																										R-HSA-2730905
																										R-HSA-2871796
																										R-HSA-2871809		0.1184		0	0	45.6	0	2.9	0	0	0	0	0	51.5	0	0	0	0	0	0	0	0	0
																										R-HSA-2871837	0.1184
																										R-HSA-2894858
																										R-HSA-2894862
																										R-HSA-2979096
																										R-HSA-2980736
																										R-HSA-2980766		0.1492		3.5	0	11	0	20.3	12.6	0	0	8.6	3	0	4	26	0	5.1	0	0	1.3	4.7	0
																										R-HSA-2990846	0.1492		0.2257	0.7	0	17.4	0	13	14.8	0	0	9.8	10.3	0	8	18.2	0	3.8	0	0	0	4	0
																										R-HSA-2995383	0.2257
																										R-HSA-2995410
																										R-HSA-3000157		0.1854		1	0	48.6	0	0	6.5	0	0	3.3	5.6	0	19.1	11.8	0	0	4.2	0	0	0	0
																										R-HSA-3000170	0.1854
																										R-HSA-3000171
																										R-HSA-3000178
																										R-HSA-3000480		0.3285		0	3.3	44.9	1.1	21.7	2.8	0	0	1.1	5.8	0	7.2	6	0	0	0.4	0	3.3	0	1.1
																										R-HSA-3000484	0.3285	0.3105		0	0	50.3	0	10.4	1.5	0	0	2.4	3.9	0	4.7	23.9	0	0	3.1	0	0	0	0
																										R-HSA-3065678	0.3105	0.1385		0	0	59.4	0	0	0	0	0	0	0	4.1	20.9	15.6	0	0	0	0	0	0	0
																										R-HSA-3108214	0.1385		0.2021	2.1	0	20.2	0	14.5	10	0	0	6	9.4	0	8.7	21.9	0	3.3	0	0	0	4.1	0
																										R-HSA-3108232	0.2021		0.2213	1.4	0	15.8	0	13.9	15.5	0	0	10.2	10.3	0	7.4	17.9	0	4	0	0	0	3.7	0
																										R-HSA-3134975	0.2213
																										R-HSA-3214815			0.1198	0	1.9	17.7	0.5	31.7	11.6	0.4	0	4.6	14.4	0	10.4	0	0	5	0	0	0	1.8	0
																										R-HSA-3214841	0.1198		0.1043	11.6	0	11.7	0	18.8	14.2	0	0	12	6	0	0	18.6	0	6.1	0	1	0	0	0
																										R-HSA-3214842	0.1043
																										R-HSA-3214847		0.1642		0	0	23.5	0	34.9	9.9	0	1.7	11.7	8.6	0	0	0.5	0	6.2	0.9	2.2	0	0	0
																										R-HSA-3214858	0.1642		0.2266	1.9	2.5	38.3	0	0	6.2	4.4	0	0	9.3	2.8	14.5	11.5	1.9	5	1.6	0	0	0	0
																										R-HSA-3215018	0.2266	0.1245		0	0	58.8	0	0	0	0	0	0	0	3.1	18.2	19.9	0	0	0	0	0	0	0
																										R-HSA-3229121	0.1245
																										R-HSA-3232118
																										R-HSA-3232142			0.1636	6.2	0	13.2	0	16.8	13.6	0	0	9.5	7.5	0	0	24.5	0	4.4	0	0	0	4.3	0
																										R-HSA-3238698	0.1636
																										R-HSA-3247509		0.1032		6.9	0	0	0	24.4	21	0	0	14.4	11.6	0	0	15.2	0	6.3	0	0.2	0	0	0
																										R-HSA-3270619	0.1032	0.2529		0	0	49.9	0	0	0	0	0	4.1	6.5	0	12.6	22.6	4.2	0	0	0	0	0	0
																										R-HSA-3295583	0.2529	0.1998		1.8	8	23.9	0	15.2	3.2	3	1.8	1.8	4.2	5.6	0	3.9	5.9	0	0	0	2.3	2.3	1.8
																										R-HSA-3296469	0.1998
																										R-HSA-3296482
																										R-HSA-3299685
																										R-HSA-3301854			0.1605	5	0	19.2	0	11.9	13.9	0	0	8.8	4.7	0	0.2	27.1	0	5.4	0	0	0	3.9	0
																										R-HSA-3322077	0.1605
																										R-HSA-3371378		0.2368		0	4.9	42	1.2	14	6.8	3.9	0	4.7	0	9.3	10.8	0	1.9	0.5	0	0	0	0	0
																										R-HSA-3371453	0.2368		0.3707	0	1.7	23.1	2.9	6.7	9.5	2.7	0	2.3	6.5	0	11.5	17.3	2.2	6.2	0	0	0	1.8	0
																										R-HSA-3371497	0.3707
																										R-HSA-3371511
																										R-HSA-3371556			0.3461	0	1.7	25	1.4	6	11.4	0.9	0	3	7.4	0	12	17.1	2.5	6.1	0	0	0	0.8	0
																										R-HSA-3371568	0.3461
																										R-HSA-3371571
																										R-HSA-349425
																										R-HSA-350054
																										R-HSA-350562
																										R-HSA-351202
																										R-HSA-352230		0.1151		0	0	41.3	5.1	29.5	0	0	9	0	0	0	0	2.4	0	5.1	3.2	0	4.4	0	0
																										R-HSA-354192	0.1151
																										R-HSA-354194		0.125		3.9	3.9	10.1	0	8	0	1.1	1	14.5	3.7	12.8	9.7	4.2	5.3	1.7	0	5	0	1.6	0.9
																										R-HSA-3560782	0.125	0.1057		0	0	1	0	37.1	0	0	0	0	2.5	0	30.1	0	9.9	2.3	0	0	0	9.5	7.7
																										R-HSA-3700989	0.1057		0.3172	0	0	23.9	0	7.3	13.1	0	0	12.8	14.5	0	0	17.6	0	2.7	0	0	0	8.3	0
																										R-HSA-372708	0.3172	0.1789		3.9	5.4	14.8	0.1	7.3	0.2	0.5	3.5	11.5	1.6	8.3	13	9.1	2.8	1.4	3.2	0.4	0	0	2
																										R-HSA-372790	0.1789	0.1735		0	2	34	2.9	18.9	5.4	2.4	3.3	6.4	0	0.9	11.3	7.4	0	1.4	2.8	0	0	0.8	0
																										R-HSA-373076	0.1735	0.2077		0.3	0	49.7	0	12.1	1.8	1.2	0	0	1.5	0	13.7	18.5	0	0	0	0	0	1.3	0
																										R-HSA-373080	0.2077	0.3128		0	2.3	50.4	0	16.6	0	0	0	0.2	0	0	16.6	13.8	0	0	0	0	0	0	0
																										R-HSA-373752	0.3128	0.2656		0	0	47.5	1.2	0	0	0	0	0.5	2.4	0	10.3	36.8	0	1.3	0	0	0	0	0
																										R-HSA-373753	0.2656		0.3373	5.4	1.8	23.3	0	8.3	13.9	0	0	13.7	11	0	1.7	17.4	0	3.6	0	0	0	0	0
																										R-HSA-373755	0.3373		0.1464	0	0	35.2	0	0	0	0	0	0	0	3.9	43.5	1.4	0	0	0	0	0	0	0
																										R-HSA-373760	0.1464
																										R-HSA-375165		0.2978		3.4	0	24.8	0	9.9	9.7	0	0	14.2	13.1	0	0	18.9	0	2.8	0	0	0	3.1	0
																										R-HSA-375276	0.2978	0.1391		0	0	44.1	0	0	3.3	0	0	0	0	0	18.6	28.3	4.9	0	0	0	0	0.7	0
																										R-HSA-376176	0.1391	0.2238		0	0	42.6	0	14.9	0	4.7	0	0	0	7.8	13.8	0	0	0	0	0	3.3	0	0
																										R-HSA-3769402	0.2238		0.3033	4.2	0	19.6	1.3	12	12.3	0	0	0	2.4	0.8	23.5	12.8	0	5.3	0	0	0	1.8	0
																										R-HSA-3781860	0.3033	0.1144		0	0	27	4.9	22.8	0	6.4	0	0	0	0	0	5.5	12.7	0	0	8	0	12.7	0
																										R-HSA-3781865	0.1144		0.1929	0	0	7.8	0	34.6	0	0	0	0	11.4	0	9.7	30.8	0.9	4.7	0	0	0	0	0
																										R-HSA-379716	0.1929	0.3603		0	0.2	40.3	3.1	15.8	7.1	0	0	9.1	0	0	13.4	7.8	0	0	0	3.2	0	0	0
																										R-HSA-379724	0.3603	0.3577		0	0.4	39.9	3.3	16.1	6.5	0	0	9.3	0	0	13.4	7.9	0	0	0	3.2	0	0	0
																										R-HSA-379726	0.3577	0.3029		0	3.4	35	4	19.6	2.5	1.7	0	9.4	0	1	16.3	2.8	0	0	0	3.5	0	0.8	0
																										R-HSA-380108	0.3029
																										R-HSA-380259		0.1336		4	0	43	4.9	0	10.6	0	0	2	11.4	0	10.4	7.3	1.9	4.4	0	0	0	0	0
																										R-HSA-380270	0.1336	0.1232		0	1.2	39.2	5.1	0	15.5	0	0	0	12.7	0	17.6	0	2.3	6.2	0	0	0	0	0
																										R-HSA-380284	0.1232	0.1336		4	0	43	4.9	0	10.6	0	0	2	11.4	0	10.4	7.3	1.9	4.4	0	0	0	0	0
																										R-HSA-380287	0.1336	0.1232		0	1.2	39.2	5.1	0	15.5	0	0	0	12.7	0	17.6	0	2.3	6.2	0	0	0	0	0
																										R-HSA-380320	0.1232	0.1772		5.7	1.3	37.1	2.6	0	9.7	0	2.6	4	5.2	0	9.7	0	0.9	7.7	0	0	1.5	2.8	3.3
																										R-HSA-380972	0.1772
																										R-HSA-380994
																										R-HSA-381033		0.1824		0	0	48.3	3.5	12.4	0	2.9	0	9.2	5.6	0	5.4	7.4	0	0.8	0	0	4.5	0	0
																										R-HSA-381038	0.1824	0.1744		0	0	52.9	0	33	0	2.7	0	0	0	0	6.1	0	0.1	0	0	0	5.3	0	0
																										R-HSA-381042	0.1744	0.1696		0	0	51	0	25.7	0	5.2	0	0	0	0	7.9	5.1	0	0	0	0	1.6	3.6	0
																										R-HSA-381070	0.1696	0.1534		0	0	42.1	4.8	14.8	0	10.9	0	11.7	0	0	0	0	7.9	6.2	0	0	1.6	0	0
																										R-HSA-381119	0.1534	0.2465		0	0	44.9	2	17.5	0	6.2	0	7	5.7	0	4.7	2.9	1.7	2.3	0	0	2	3.2	0
																										R-HSA-381183	0.2465	0.1258		0	0	50.3	5.6	10.7	0	1.8	0	12.1	5.9	0	4.7	2.9	0	0	0	0	6.1	0	0
																										R-HSA-381340	0.1258
																										R-HSA-381426			0.1418	0	0	8.8	0	32.6	0	0	6.7	0	3	0.3	0	19.4	0	6.1	0	0	6.4	4.2	0
																										R-HSA-381676	0.1418	0.2377		2.9	0	27.5	2.7	17	2	0	0	14.5	0	5.4	19.6	1.7	0	1	0	0.9	0	4.8	0
																										R-HSA-382551	0.2377
																										R-HSA-382556
																										R-HSA-383280		0.1631		0	6.3	9.4	0	13.2	21.9	0	0	20.5	21.4	0	0	0	0	0	0	7.1	0	0	0
																										R-HSA-3858494	0.1631
																										R-HSA-388396		0.1341		0	0.5	29.3	4.3	17.5	6.7	4.5	3.2	7.1	0	2.2	8.6	5.1	0	0.9	2.6	0	0.8	0	0
																										R-HSA-388841	0.1341	0.3596		0	0	46	0	0	0	0	0	0	14.4	15.3	4.4	11.9	0	0	0	2.2	0	0	0
																										R-HSA-389356	0.3596		0.2037	0	0	29.9	0	4.6	7.7	0	0	2	18.8	0	8.8	27.1	0	1.2	0	0	0	0	0
																										R-HSA-389357	0.2037		0.2776	0	0	34.8	0	0.6	8.6	0	0	6.2	13.7	0	9.9	21.3	0	1.3	0	0	0	3.6	0
																										R-HSA-389359	0.2776	0.217		0	0	36.3	0	13.3	4	0	0	6.7	0	0	11.1	19.2	0	0	0	6.6	0	2.8	0
																										R-HSA-389513	0.217	0.2938		0	0.8	48.2	0	0	0	0	0	3.5	12.8	0	0	34.7	0	0	0	0	0	0	0
																										R-HSA-389661	0.2938	0.1749		0	0	50	0	19.4	0	0	0	0	0	0	13.5	14.4	0	0	0	2.8	0	0	0
																										R-HSA-3899300	0.1749		0.2127	4.7	0	0	0	19.9	26.5	0	0	20.3	11.5	1.1	0	10.5	0	3.1	0	0	0	2.5	0
																										R-HSA-389948	0.2127	0.3083		0	0	44.1	2	2	0	0	0	0	10	18.6	1.7	7.9	1.4	0	0	5.4	0	0	0
																										R-HSA-389957	0.3083	0.125		0	0	50.8	1.4	18.4	0	1.2	0	0.5	0	8.1	8.4	0	0	2.8	0	0	8.5	0	0
																										R-HSA-389958	0.125	0.128		0	0	50.9	1.2	17.6	0	0.4	0	0.7	0	9.1	8.8	0	0	2.2	0	2.8	6.1	0	0
																										R-HSA-389960	0.128	0.1266		0	0.8	53.7	0	8.4	0	0	0	0	0	12.2	13.1	0	0	0.7	0	11.1	0	0	0
																										R-HSA-389977	0.1266
																										R-HSA-390247		0.3125		0.8	3.6	44.2	0.7	5.7	0	0	0	12.2	8.5	0	4.7	18.4	0	0	0	0	0	1.3	0
																										R-HSA-390450	0.3125	0.3006		0	0	46.4	1.6	18.5	0	0.6	0	2.2	0	5.6	9	13.3	0	0	0	2.6	0	0	0
																										R-HSA-390466	0.3006	0.1681		0	0	51.6	0	18.8	0	0.7	0	0	0	3.3	9.7	9.3	0	2.9	0	0.5	3.3	0	0
																										R-HSA-390471	0.1681	0.309		0	0	50.1	0	15.2	0	0.3	0	0	0	2.7	9.9	21.8	0	0	0	0	0	0	0
																										R-HSA-390522	0.309
																										R-HSA-3906995			0.1603	0	0	44.9	0	0	0	0	0	0	7.6	0	6.8	40.8	0	0	0	0	0	0	0
																										R-HSA-390918	0.1603	0.1761		1.7	0.6	23.4	3.5	24.6	4.3	0.3	0	10.3	5.5	7.3	13.8	4.5	0	0	0	0	0	0	0
																										R-HSA-391160	0.1761	0.1509		0	0	53.2	5	0	0	0	0	0	1.5	0	20.4	19.9	0	0	0	0	0	0	0
																										R-HSA-391251	0.1509	0.1553		0	0	52.3	0	20.1	0	0.3	0	0	0	3.1	10.3	7.6	0	2.3	0	0	4.1	0	0
																										R-HSA-391903	0.1553	0.2284		0	0	48.8	0	0	0	4.2	0	0	0	12.5	4.7	14.4	0	8.7	0	0	0	0	0
																										R-HSA-392154	0.2284	0.19		0	0	49.3	0	26.7	3.8	0	0	0	0	0	2.5	8.5	0	0	3.7	5.5	0	0	0
																										R-HSA-392170	0.19	0.324		0	0.2	44.1	0.9	12.4	0	1.6	0	3.2	0	4.1	17.5	13	0	0	0	0	0	2.9	0
																										R-HSA-392451	0.324	0.2293		0.1	0	44.1	0.2	14	2.7	0	0	8.6	0	2.4	19.9	8	0	0	0	0	0	0	0
																										R-HSA-392499	0.2293	0.2722		0	0	43.6	0	17.6	0	5.7	0	0	0	0.8	15.4	3.5	0	1.3	0	0	2.1	0	0
																										R-HSA-392517	0.2722		0.3416	0	0	28.5	0	8.6	6.3	0	1	11.4	19.8	0	0	24.4	0	0	0	0	0	0	0
																										R-HSA-392518	0.3416	0.393		1.6	3.1	35.3	3.7	16.4	0	1.9	0.3	6	0.2	3.9	14.8	8.2	0	0.1	0	0	0.1	4.4	0
																										R-HSA-392851	0.393	0.2817		0	0	45.4	0	11.9	0	0.6	0	4.5	0	3	18.1	15.7	0	0	0	0	0	0.8	0
																										R-HSA-3928662	0.2817
																										R-HSA-3928663		0.1954		8.3	0	15.1	0.9	5.9	3.1	0	0	20.5	6.8	12.6	7.4	16.8	0.6	0	1.6	0	0	0.2	0
																										R-HSA-3928664	0.1954
																										R-HSA-3928665
																										R-HSA-397014
																										R-HSA-397795		0.1905		0	0	51.1	0	0	0	3.6	0	0	0	0	29.6	15.7	0	0	0	0	0	0	0
																										R-HSA-399719	0.1905	0.1474		0	0	19.1	0	0	24.7	0	10.2	16	0	0	2.4	11.5	0	0	0	0	0	0	3.9
																										R-HSA-399721	0.1474	0.1474		0	0	19.1	0	0	24.7	0	10.2	16	0	0	2.4	11.5	0	0	0	0	0	0	3.9
																										R-HSA-399954	0.1474	0.1584		0.8	0	36	4	24.7	4.6	0	0	1	0	0	0	13.6	0	0.8	0	0	0	9	0
																										R-HSA-399955	0.1584	0.2967		0	1.4	42.1	6.9	13	0	2.2	0	8.4	7.1	0	0	17.9	0	0	0	0	0	0.9	0
																										R-HSA-399956	0.2967	0.2122		2.8	0.9	36.5	3.2	14.2	0.1	1.5	0	13	2.4	9.1	0	13.9	0	0	0	0	2.4	0	0
																										R-HSA-399997	0.2122	0.1947		0	0	32.1	11.2	0	8.3	5.6	0	1.5	0	0	2.5	18.9	0	3.4	1	0	0	0	1
																										R-HSA-400042	0.1947	0.287		0	0	48.5	0	8.8	0	0.2	0	2	0	3.7	18.8	17.7	0	0	0	0	0	0.2	0
																										R-HSA-400206	0.287
																										R-HSA-400253		0.1315		0	0	0	0	22.1	19.8	0	0	22.1	21.5	0	0	0	0	0	0	13.2	0	1.3	0
																										R-HSA-400451	0.1315	0.2202		5.5	2.9	16.8	7.8	8.2	0.5	5	0	3	4.1	2	13.3	9	0	4.9	0	0	0	0.5	4.1
																										R-HSA-400685	0.2202		0.2908	3.6	4.5	36.4	1.3	15.2	0	1.9	0	3.7	5.5	4.9	17.7	3.5	1.6	0	0	0.3	0	0	0
																										R-HSA-4085001	0.2908		0.2668	0	0	48.9	0	0	0	0	0	4.6	9	0	13.1	21.6	0	0.4	0	0	0	2.4	0
																										R-HSA-4085377	0.2668		0.2018	2.1	0	24.1	0	7.3	11.8	1.8	0	5.8	6.2	0	3.9	24.6	0	4.7	0	0	0	3.5	0
																										R-HSA-4086398	0.2018
																										R-HSA-4086400
																										R-HSA-4090294
																										R-HSA-416476		0.2563		0	2	37.6	3.3	16.6	6.8	5	0	3.6	0	0.8	8.4	6.2	0	0.6	0	3.3	0	0	0
																										R-HSA-416482	0.2563	0.154		0	0	41.8	2.5	13.2	0	0	0	5.6	0	0	19.5	14.1	0	0	0	0	3.3	0	0
																										R-HSA-416572	0.154		0.2785	3.3	4.6	32.2	2	16	0	1.8	1.2	4.7	5	4.1	14.9	3.5	1.3	0	0	1	0	0.4	0.6
																										R-HSA-416700	0.2785		0.1503	0	0	30.9	0	8.9	0	0	0	0	0	0	25	23.1	0	0.3	0	0	0	1.5	0
																										R-HSA-416993	0.1503	0.2826		0	8.2	37.1	3.6	15.7	0.9	3.7	1.2	0	0	0	16.3	5.1	0	1.1	0	0	0	6.4	0.7
																										R-HSA-418038	0.2826	0.1231		0	0	35	11.4	0	0	18.8	0	0	7.9	13	0	0.8	6.9	0.5	0	0	0	5.8	0
																										R-HSA-418217	0.1231	0.2954		0	0	51.9	0	0	0	0	0	0	0	1.7	24.2	22.3	0	0	0	0	0	0	0
																										R-HSA-418346	0.2954	0.3108		5.6	0	30.3	2.6	17	0	0	0	12.1	1.5	0	26	1.8	0	0.5	0	1.3	0	1.3	0
																										R-HSA-418360	0.3108	0.1039		10.1	0	10.4	0	19	11.1	0	0	16	17.6	0	0	0	0	6	0	0.3	0	0	0
																										R-HSA-418457	0.1039	0.1812		0	0	50.1	0	26.6	4.3	0	0	0	0	0	2	7.9	0	0	3.1	5.9	0	0	0
																										R-HSA-418555	0.1812	0.1546		0	0.4	40.4	4.4	12.7	0	2.8	0	9.1	0	3.4	11.7	15	0	0	0	0	0	0	0
																										R-HSA-418592	0.1546	0.396		0.3	2.2	40.2	2.6	15	0	1.8	0	3.8	0	3.8	14.2	12.1	0	0	0	0	0	4.2	0
																										R-HSA-418594	0.396
																										R-HSA-418597		0.135		1.1	0.1	16.8	2.9	15.4	0.6	0.2	3.2	24	1.8	10.4	18	0	0	3.2	0	0	2.2	0	0
																										R-HSA-418885	0.135	0.3494		0	0	49	0	0	0	0	0	9.3	3.8	0	7.8	28.9	0	0	0	0	1.3	0	0
																										R-HSA-418990	0.3494		0.1084	0	0	10.3	4.2	24.6	10	5.1	0	3.4	9.4	0	18.7	0	0	1	0	0	0	0	1.4
																										R-HSA-419037	0.1084	0.1473		1.5	4.3	0	0	0	0	0.2	0	25	21.4	25.3	9	0	0	0.1	0	0	0	13.1	0
																										R-HSA-420029	0.1473	0.1756		0	0	45.4	0	0	6.7	0	0	0	0	1.7	0	8.4	4.7	0	0	0	0	11.9	21.2
																										R-HSA-420092	0.1756	0.2696		0	0	48.5	0	9.8	0	0.2	0	2.1	0	4.2	16.2	18.9	0	0	0	0	0	0	0
																										R-HSA-421270	0.2696
																										R-HSA-422356		0.1909		7.7	0	24.4	6.6	10.2	5.6	2.8	0	11.2	0	6.1	17.8	3.6	0.4	0.8	0	0	0	2.7	0
																										R-HSA-422475	0.1909	0.2147		0	0	40.7	0	13.6	3.3	5.1	0	0	0	5.7	14.6	0	0	1.4	0	0	4.1	0	0
																										R-HSA-425366	0.2147	0.2227		0	0	46.7	6.1	0	0	0	0	0	0	12.5	11.5	10.8	0	1.2	0	0	0	0	0
																										R-HSA-425393	0.2227
																										R-HSA-425397
																										R-HSA-425407
																										R-HSA-425410		0.1871		0	0	53.5	1.2	0	0	0	0	0	0	13.1	7.7	23.4	0	0.1	0	1	0	0	0
																										R-HSA-427359	0.1871	0.1236		0	2.6	44.6	0	6.6	1.3	0.4	0.1	0	0	8.9	14.1	13.9	4.5	1.6	0	0	0	1.5	0
																										R-HSA-427389	0.1236
																										R-HSA-427413
																										R-HSA-428157		0.1495		0.1	1.3	13.7	0	39.7	0	0	0	0	0	3.7	0	20.3	0.5	10.1	0	0	0	0	3.7
																										R-HSA-428540	0.1495	0.2193		0	1.6	43.4	0.4	18.6	0	3.1	0	0	0	7.4	14.4	0	0	0	0	3.4	0	2.4	0
																										R-HSA-428930	0.2193	0.3707		1.3	3	32.7	4.6	17.7	0	1.4	0	8.4	0	4	14.9	6.4	0.2	0	0	0	0	5.5	0
																										R-HSA-429914	0.3707	0.1154		0	0	38.7	0	1.7	0	0	0	1	4.8	0	0	37.4	0	0	0	0	0	16.4	0
																										R-HSA-429947	0.1154	0.1643		0	0	43	0	0	0	0	0	2.3	5.9	0	0	36.1	0	1.9	0	0	0	10.8	0
																										R-HSA-429958	0.1643	0.1761		0	0	38.7	0	0	0	0	0	4.8	0	0	14.3	37.4	0	0	0	0	0	4.8	0
																										R-HSA-430039	0.1761
																										R-HSA-430116			0.2078	1.9	1.6	14.9	0	4.3	15.5	3.8	3.2	13.6	17.2	7.9	0	11.3	0.4	1.3	0	0	0.5	2.6	0
																										R-HSA-432040	0.2078	0.1328		0.9	0	19.2	4.3	10.5	0.4	0	0.6	17.6	0	11.4	11.5	8.2	1.9	0.6	0	2.1	0	4.8	0
																										R-HSA-432142	0.1328
																										R-HSA-432720		0.2701		0	3.8	37.8	0	39.9	0.8	0	0	4.4	0	0	0	6.7	0	0.9	0	0	3.6	0	0
																										R-HSA-432722	0.2701	0.1803		9.6	5.3	29.1	1.5	23.6	5.8	0	5	0	0	0	11.3	0	1.7	0	0	0	0	7	0
																										R-HSA-434316	0.1803	0.2496		0	0	36	10	0	0	3.2	0	0	0	0	12.8	19.6	0	2.4	1.1	0	0	0	0
																										R-HSA-435354	0.2496	0.1024		0	0	8.4	4.8	0	1.9	2.3	0	7.8	6.3	19.5	0	9.8	0	4.5	0	0	0	34.7	0
																										R-HSA-437239	0.1024
																										R-HSA-438064		0.1195		1.3	5.9	8.9	4.3	12.6	8.5	3.3	8	8.6	0.5	10.5	0	4.1	2	0.1	4.5	0	0	0	3.2
																										R-HSA-438066	0.1195		0.1275	0	0	0	0	19.4	11.9	0	8.2	3.2	14.3	0	7.9	7.1	4.8	0	0	0	3.3	0	5.4
																										R-HSA-4419969	0.1275	0.1101		0	4.3	18.3	2.2	24.1	1.5	0	5.3	7	0	0	2.8	8.8	9.2	2.2	0	4.6	0	1.3	6
																										R-HSA-4420097	0.1101
																										R-HSA-442720		0.1536		0	2	19.1	1.6	5.6	4	1.7	0.5	15.3	8.7	10.7	0	11.5	3.8	0.9	2.4	0	0	7.8	0
																										R-HSA-442729	0.1536
																										R-HSA-442742		0.1422		1.3	3.8	12.7	5.5	15.2	8.6	3.3	0.8	10.4	4.7	6.6	4.6	3.8	0	0	4.1	0	0	3.5	0
																										R-HSA-442755	0.1422	0.1689		0.2	5.3	15.4	4.2	13.4	8.2	2.7	7.1	6.6	0	8.6	0	6.7	0.3	0	4.7	0	0	0	3.4
																										R-HSA-442982	0.1689		0.1057	0	0	0	1	38.3	0	2.9	0	2.1	7.4	0	0	28.1	0	0	0	0	0.6	19.6	0
																										R-HSA-445095	0.1057		0.3047	0	2.6	33.5	0	2.4	12.9	0	0	0.3	8.1	4.1	20.3	10.8	0	4.9	0.1	0	0	0	0
																										R-HSA-445144	0.3047		0.1227	0	0	0	0	29.5	0	0	0	0	0	4.3	7.8	26.2	0	0	0	0	0	4.6	1.3
																										R-HSA-445355	0.1227
																										R-HSA-445717		0.1707		0	0	26.5	3.6	13.3	0.4	0	0.1	15.5	0	10.4	12	8.4	2.1	0.8	0	2.5	0	4.4	0
																										R-HSA-445989	0.1707
																										R-HSA-446193			0.2352	0.8	0	21.5	0	11	12.8	0	0	16.6	10.6	4.9	0.2	10.3	0	5.1	2.8	0	0	0	0
																										R-HSA-446203	0.2352	0.143		1.6	0	45.4	1.4	18.3	0	6.7	0	4.5	8.8	0	2.3	3.9	0.1	0	0	0	4.2	2.7	0
																										R-HSA-446219	0.143		0.2331	0	0	28.8	0	7.2	10.1	0	0	14.8	10.1	3.2	1.6	15.7	0	4.4	2.1	0	0	2	0
																										R-HSA-446353	0.2331
																										R-HSA-446652			0.1344	0	5.2	28.3	5.7	2.2	7.4	0	0	9	13.7	0	13	8.6	0	0.8	0.3	0	5.6	0	0
																										R-HSA-446728	0.1344
																										R-HSA-447115		0.1782		0	0	50.2	0	1.6	1.7	0	0	0	0	0	8.4	25.1	0	0	0	0	0	0	7.8
																										R-HSA-448424	0.1782	0.1493		0	0	45.2	2	0	0	0	0	0	0	0	35.8	2.3	0	0	0	2.9	0	0.8	0
																										R-HSA-449147	0.1493	0.1086		0	0	39.3	0	0	0	0	0	0	0	15.7	8.5	14.8	0	0	9.4	0	0	0	0
																										R-HSA-449836	0.1086
																										R-HSA-450282		0.2579		0	1.1	43.2	0	0	0	0	0	0	0	0	33.8	4.9	0	0	1.8	0	0	5.1	0
																										R-HSA-450294	0.2579	0.1302		0	0	43.7	2	0.5	0	0	0	0	0	0	36.3	0	0	0	2.3	0	0	4.2	0
																										R-HSA-450302	0.1302
																										R-HSA-450321		0.1189		0	0	0	3.6	22	7.1	1.4	0.5	7.5	5.6	0	0	18.7	8.5	4.8	0	0	0	9.4	6.1
																										R-HSA-450385	0.1189	0.2462		0	0	22.2	8.3	22.6	0	5.5	0	3.4	3	6.5	5.9	6.4	0	0	0	0	0	6.9	0
																										R-HSA-450408	0.2462
																										R-HSA-450513		0.1417		0	0	18.2	7.7	23.2	0	8.6	0	4.5	2.8	12.1	0	8.7	0	0	0	0	0.2	14	0
																										R-HSA-450531	0.1417
																										R-HSA-450604		0.1027		0	0.9	28.8	18.8	11.8	0	3.6	0.3	0	0	2.3	13.7	0	0	2.8	0	0	0	4.6	10.9
																										R-HSA-451326	0.1027	0.2659		0	0	40.3	0.7	9.5	0	2	0	7.6	0	5.9	19.4	10.8	1.1	0	0	2.7	0	0	0
																										R-HSA-451927	0.2659	0.1147		0	0	34.4	0	31.7	0	0	10.8	3	0.9	0	0	0	0	0	0	0	0	4.1	0
																										R-HSA-452723	0.1147
																										R-HSA-453274		0.1061		0	0	56.3	5	23.4	2.5	0	0	0	0	0	6.6	2.1	0	0	0	4.1	0	0	0
																										R-HSA-453276	0.1061
																										R-HSA-453279
																										R-HSA-4551638			0.2451	0	0	25.6	0	6	13.7	0.2	0	1.6	5.8	0	15.4	22.7	0	2.8	0	0	0	1.1	0
																										R-HSA-456926	0.2451	0.3521		2.6	0.9	34.5	3.6	15.7	0	0.7	0	9.5	0	5.6	17.3	5.9	0	0	0	0.5	0	3.3	0
																										R-HSA-4570464	0.3521		0.2306	0	0	23	0	8.9	14.1	0	0	5	7.4	0	7	26.4	0	3.2	0	0	0	4.9	0
																										R-HSA-4608870	0.2306
																										R-HSA-4615885			0.2165	1.6	0	33.3	0	2.4	9.3	1.1	0	4.2	6.2	0	7	23.9	0	4.5	0	0	0	2.6	0
																										R-HSA-4641257	0.2165
																										R-HSA-4641258
																										R-HSA-4641262		0.3038		0.6	0	17.6	4.5	16	2.7	0.9	0	11	3.7	8.5	14	11.2	0.4	0	0	0	0.3	8.7	0
																										R-HSA-4641263	0.3038
																										R-HSA-4641265		0.2803		11.4	0	27.2	0	0	2.5	6.1	0	0.2	0	3	35.9	0	0	0	0	0	0	4.7	0
																										R-HSA-4655427	0.2803
																										R-HSA-4791275		0.2345		0	0	12.6	3.4	20.7	0	0.3	0	15.3	5.1	11.7	8.5	10.3	0	0	0	2.8	0	9.3	0
																										R-HSA-4839726	0.2345	0.1032		6.9	0	0	0	24.4	21	0	0	14.4	11.6	0	0	15.2	0	6.3	0	0.2	0	0	0
																										R-HSA-4839735	0.1032	0.2417		1.8	1.7	1.1	3.8	11	3.8	0.9	0	15.3	8.3	11.5	10.9	14.1	2.3	0.8	0	0	0	12.7	0
																										R-HSA-4839743	0.2417	0.2513		0	0.8	0	4.6	12.7	3.4	1	0	15.1	7.2	10.7	11.7	18.2	1.1	0	0	0	0	13.7	0
																										R-HSA-4839744	0.2513	0.2417		1.8	1.7	1.1	3.8	11	3.8	0.9	0	15.3	8.3	11.5	10.9	14.1	2.3	0.8	0	0	0	12.7	0
																										R-HSA-4839748	0.2417	0.2417		1.8	1.7	1.1	3.8	11	3.8	0.9	0	15.3	8.3	11.5	10.9	14.1	2.3	0.8	0	0	0	12.7	0
																										R-HSA-499943	0.2417
																										R-HSA-500657		0.2954		0	0	51.9	0	0	0	0	0	0	0	1.7	24.2	22.3	0	0	0	0	0	0	0
																										R-HSA-500792	0.2954	0.2569		0	1.1	49.6	0	14.5	1.3	0.7	0	0	1.4	0	14.4	16.4	0	0	0	0	0	0.7	0
																										R-HSA-5083635	0.2569		0.1464	0	0	17.2	0	25.1	0	0	0	0	9.6	0	1.6	34.2	0	0.4	4.8	0	2.4	0	0
																										R-HSA-5099900	0.1464	0.1741		0	8.1	34.3	5.6	18.7	4.1	2.3	0.9	0.6	0	0	16.5	0	0	0	0	0	0	9	0
																										R-HSA-512988	0.1741
																										R-HSA-5140745		0.1811		0	7.5	41.9	7	27.6	0	3	0	0.2	0	0	7.7	0	0	0	0	0.5	0	4.6	0
																										R-HSA-5173105	0.1811	0.3447		1	0	47.5	0	19.7	0	0	0	4.7	1.2	0	19.5	6.5	0	0	0	0	0	0	0
																										R-HSA-5173214	0.3447		0.1505	0	0	17.5	0	24.7	0	0	0	0	9.4	0	2.3	32.9	0	0.6	3.7	0	3.4	0.6	0
																										R-HSA-5205647	0.1505
																										R-HSA-5205685
																										R-HSA-5210891		0.1542		2	0	41.8	0	0	0	0	0	0	0	1.4	17.6	22	0	0	0	0	8.4	0	0
																										R-HSA-5213460	0.1542
																										R-HSA-5218859
																										R-HSA-5218900		0.2368		0	4.9	42	1.2	14	6.8	3.9	0	4.7	0	9.3	10.8	0	1.9	0.5	0	0	0	0	0
																										R-HSA-5218920	0.2368
																										R-HSA-5218921		0.127		1.8	0	33.9	1.3	6	9	0	0	0	1.1	0	12.1	29.2	0	5.6	0	0	0	0	0
																										R-HSA-5223345	0.127	0.1987		0	1.7	26.5	3.9	12.6	8.2	0	0	12.1	3.8	0	7.8	13.8	0	0.9	0	0	0	8.7	0
																										R-HSA-5250913	0.1987
																										R-HSA-5250924
																										R-HSA-5250941
																										R-HSA-525793
																										R-HSA-5260271			0.3913	0	2.1	31.2	2.6	4.5	9	0	0	11	11.9	0	6.7	17.3	0	0.2	0	0	0	0	0
																										R-HSA-532668	0.3913	0.3388		0	2.4	44.9	0	16.5	1.1	2.5	0	2.5	6.8	2.3	4.8	8	0	4.2	0	0	1.2	2.6	0
																										R-HSA-5334118	0.3388	0.1173		1.5	1.1	44.4	0	8.8	1.5	0	1.3	1.5	0	6.7	6.1	22	3.8	0	0	0	1.4	0	0
																										R-HSA-5339562	0.1173
																										R-HSA-5339716		0.2513		0	0.8	0	4.6	12.7	3.4	1	0	15.1	7.2	10.7	11.7	18.2	1.1	0	0	0	0	13.7	0
																										R-HSA-5357769	0.2513		0.3625	0	3.8	36.7	3.2	0	8	0.1	0	4.2	5.9	2.3	21.8	5.8	3.2	4.9	0	0	0	0	0
																										R-HSA-5357786	0.3625	0.1067		0	3.2	57.3	0	29	0	0	0	0	10.4	0	0	0	0	0	0	0	0	0	0
																										R-HSA-5357801	0.1067
																										R-HSA-5357905
																										R-HSA-5357956
																										R-HSA-5358346
																										R-HSA-5358351
																										R-HSA-5358508		0.357		0	3.5	36.7	5.8	0	0	3.6	0	0	10.2	1.6	17.3	13.2	0	0.7	0	0.8	0	0	0
																										R-HSA-5358565	0.357	0.322		0	2.2	36.4	6.3	0	0	3.8	0	0	9.7	3.2	17.1	10.5	0	1.3	0	2.2	0	0	0
																										R-HSA-5358606	0.322	0.3624		0	4.7	34.9	5.7	0	0.2	3.5	0	0	10.8	2.3	18.5	10.1	0	0.3	0	2.1	0	0	0
																										R-HSA-5358747	0.3624	0.2513		0	0.8	0	4.6	12.7	3.4	1	0	15.1	7.2	10.7	11.7	18.2	1.1	0	0	0	0	13.7	0
																										R-HSA-5358749	0.2513	0.2513		0	0.8	0	4.6	12.7	3.4	1	0	15.1	7.2	10.7	11.7	18.2	1.1	0	0	0	0	13.7	0
																										R-HSA-5358751	0.2513	0.2513		0	0.8	0	4.6	12.7	3.4	1	0	15.1	7.2	10.7	11.7	18.2	1.1	0	0	0	0	13.7	0
																										R-HSA-5358752	0.2513	0.2513		0	0.8	0	4.6	12.7	3.4	1	0	15.1	7.2	10.7	11.7	18.2	1.1	0	0	0	0	13.7	0
																										R-HSA-5362517	0.2513		0.2197	1.4	0	28	0	0	14	0	0	9.9	15.3	1.5	1.3	15.7	0	3	0	0	0	10	0
																										R-HSA-5362768	0.2197
																										R-HSA-5365859		0.1233		0	0	0	10.4	0	42.1	0	0	0	0	27.4	3.4	0	7.1	0	0	9.7	0	0	0
																										R-HSA-5368286	0.1233
																										R-HSA-5368287
																										R-HSA-5387390
																										R-HSA-5389840
																										R-HSA-5419276
																										R-HSA-5423646		0.119		0	0	32.8	0	10.8	0	0	0	4.5	0	0	0	31.9	0	0	0	6.4	1.7	0	3.7
																										R-HSA-5467337	0.119	0.2417		1.8	1.7	1.1	3.8	11	3.8	0.9	0	15.3	8.3	11.5	10.9	14.1	2.3	0.8	0	0	0	12.7	0
																										R-HSA-5467340	0.2417	0.2417		1.8	1.7	1.1	3.8	11	3.8	0.9	0	15.3	8.3	11.5	10.9	14.1	2.3	0.8	0	0	0	12.7	0
																										R-HSA-5467348	0.2417	0.2417		1.8	1.7	1.1	3.8	11	3.8	0.9	0	15.3	8.3	11.5	10.9	14.1	2.3	0.8	0	0	0	12.7	0
																										R-HSA-556833	0.2417	0.185		0	0	42.2	0	0	4.3	0	0	0	0	10.6	16.8	0	0	0	0	9.1	0	0	0
																										R-HSA-5576891	0.185
																										R-HSA-5576892			0.1435	0	0	0	0	19.4	8.6	0	5.1	4.6	19.1	0	0.2	8.2	12.5	0	0	0	0	0	8.1
																										R-HSA-5576893	0.1435
																										R-HSA-5578749			0.1971	0	0	20.5	0	15.4	8.6	2.5	0	2.3	8.2	0	11.6	18.5	0	9.3	0	0	0	3.1	0
																										R-HSA-5578775	0.1971
																										R-HSA-5579029		0.2156		0	3.8	0	3.9	40.9	0	0	0	9.7	5.5	7.7	6	2.2	6.2	14.1	0	0	0	0	0
																										R-HSA-5601884	0.2156	0.2648		2.6	2.2	34.2	4.2	5	3.9	0	0	7.9	16.6	2.1	0	15.3	0	3.9	0	0.6	1.4	0	0
																										R-HSA-5602358	0.2648		0.3913	0	2.1	31.2	2.6	4.5	9	0	0	11	11.9	0	6.7	17.3	0	0.2	0	0	0	0	0
																										R-HSA-5602498	0.3913		0.3974	0	0	25.4	2.5	8.7	10.9	0	0	10.6	10.8	0	10.4	14.6	0.4	1.7	0	0	0.4	0	1
																										R-HSA-5603041	0.3974		0.3876	0	0	29.1	2.7	6.5	11.4	0	0	10.5	11	0	11.4	15.1	0	1.4	0	0	1	0	0
																										R-HSA-5607761	0.3876
																										R-HSA-5607763			0.2829	0	1.9	15.7	0.1	15.6	8.6	2	0	16.6	15.4	0	0	13.5	0	0.7	0	0.1	2.7	7.2	0
																										R-HSA-5607764	0.2829
																										R-HSA-5609975			0.1124	0	0	0	0	27.4	0	0	0	0	13.7	0	0	41.6	0	2	0	0	0	0	0
																										R-HSA-5610780	0.1124
																										R-HSA-5610783
																										R-HSA-5610785
																										R-HSA-5610787
																										R-HSA-5617472
																										R-HSA-5617833		0.1498		14	2.7	46.4	0	0	0	0	0	2	7.4	0	0	13.6	0	2.4	0	0	0	2.4	0
																										R-HSA-5619084	0.1498
																										R-HSA-5619102
																										R-HSA-5619107			0.1784	1.9	0	25.1	0	8.8	12.8	0.1	0	5.4	5.4	0	8.3	23.6	0	6.6	0	0	0.8	1.2	0
																										R-HSA-5619115	0.1784	0.1164		0	0	38.8	6.3	23.2	7.6	0	0	10.4	0	0	7	0.4	0	0	1.2	5	0	0	0
																										R-HSA-5619507	0.1164
																										R-HSA-5620912		0.1137		7.8	1.6	41.8	6.7	0	3.3	0	0.4	0.8	11.1	0	3.8	9.4	0	1.8	0	0	0	0	6.3
																										R-HSA-5620916	0.1137	0.1409		5.3	0	23.1	6.2	7.7	0	6.2	0	0	0	14	8.4	4.1	0.1	2	0	0	0	7.9	0
																										R-HSA-5620920	0.1409
																										R-HSA-5620922		0.2743		0	0	49.1	0	17.9	0	0	0	0.9	0	4.9	10.2	15.3	0	0	0	1.8	0	0	0
																										R-HSA-5620924	0.2743
																										R-HSA-5621480		0.2809		0	1.1	39.2	0	3.5	3.2	0	0	0	13.3	0	23.8	13.6	0	2.2	0	0	0	0	0
																										R-HSA-5621481	0.2809
																										R-HSA-5621575
																										R-HSA-5625740		0.2781		0	6	34.7	1.3	13.1	0	3.3	0.8	0	0	6.3	19.2	0	0	3.2	0	0	0	6	2.7
																										R-HSA-5625886	0.2781	0.1695		0	2.3	42.4	0	16	0.6	0.5	4.9	0	0	6.9	7.8	17	1.5	0	0	0	0	0	0
																										R-HSA-5625900	0.1695	0.2251		0	4.5	37.1	2.2	5.9	2.1	0	0	0	0	0	29.3	0	0	8.2	0	0	0	0	5.4
																										R-HSA-5625970	0.2251
																										R-HSA-5626467
																										R-HSA-5627117		0.3195		1.7	5.4	38.6	2.5	19.9	0	2.6	0	3.2	3.8	3.1	17.5	0	0	0.5	1.3	0	0	0	0
																										R-HSA-5627123	0.3195	0.182		0	5.4	34.9	1.4	11.5	5.9	1.3	0	3	0	8.8	18.6	3.5	0	3.5	0	0	0	2.3	0
																										R-HSA-5628897	0.182
																										R-HSA-5632684
																										R-HSA-5633007			0.2987	0	0	17.2	0	13.3	13	0	0	16	11.6	0	0	19.2	0	3.3	0	0	1.1	5.2	0
																										R-HSA-5633008	0.2987	0.29		0	3.3	44.9	3.3	11.4	0	3.2	0	4.2	4.6	4.7	11.8	6.8	1.8	0	0	0	0	0	0
																										R-HSA-5635838	0.29
																										R-HSA-5637810
																										R-HSA-5637812
																										R-HSA-5637815		0.1934		0	0	13.7	3.4	14.2	7	1.2	0	9.4	6.8	2.8	0	20.4	6.2	5.4	0	2.1	0	7.4	0
																										R-HSA-5651801	0.1934	0.2825		0	0	40.6	4.1	0	0	3.6	0	0	7.4	6.3	17.3	8.5	0	0	0	4.5	0	0	0
																										R-HSA-5653656	0.2825
																										R-HSA-5654687		0.1364		0	0	16.8	0	20.6	2.4	0	0	7.1	10.1	0	0	25.1	0	1.2	0	0	0	16.8	0
																										R-HSA-5654693	0.1364
																										R-HSA-5654696		0.132		0	0	17	0.1	20.4	2.4	0	0	6.9	9.8	0	0	25.5	0	1.2	0	0	0	16.8	0
																										R-HSA-5654700	0.132
																										R-HSA-5654708		0.1319		0	0	17	0.1	20.4	2.4	0	0	6.9	9.8	0	0	25.5	0	1.1	0	0	0	16.8	0
																										R-HSA-5654716	0.1319	0.1319		0	0	17	0.1	20.4	2.4	0	0	6.9	9.8	0	0	25.5	0	1.1	0	0	0	16.8	0
																										R-HSA-5654726	0.1319	0.2137		0.5	3.4	22	3.4	16.9	5.3	0	1.6	7.4	1.8	1	8.1	0.4	0	2.4	8.9	5.7	8.6	2.7	0
																										R-HSA-5654727	0.2137	0.2059		0.5	3.5	22	3.6	16.9	5.3	0	1.4	7.3	2	0.8	8	0.4	0.1	2.3	8.8	5.7	8.7	2.7	0
																										R-HSA-5654732	0.2059	0.2062		0.5	3.5	22	3.6	16.9	5.3	0	1.4	7.3	2	0.8	8	0.4	0.1	2.3	8.8	5.7	8.7	2.7	0
																										R-HSA-5654733	0.2062	0.2062		0.5	3.5	22	3.6	16.9	5.3	0	1.4	7.3	2	0.8	8	0.4	0.1	2.3	8.8	5.7	8.7	2.7	0
																										R-HSA-5654736	0.2062	0.173		0	0.5	3.7	5.3	19.9	9.2	1.3	0	12.8	5.8	7.6	0	14.2	5.1	3.9	0	1.7	0	8.9	0
																										R-HSA-5654738	0.173		0.2819	0	0	32.7	0.2	3.1	7.2	0	0	10.8	10.9	0	0.4	24.7	0	3.2	0	0	0	6.8	0
																										R-HSA-5654741	0.2819	0.1751		0	0.6	6.5	5.3	20.6	8.5	1.4	0	12	4.9	7.9	0	13.6	4.5	3.6	0	2.3	0	8.2	0
																										R-HSA-5654743	0.1751	0.173		0	0.5	3.7	5.4	19.9	9.4	1.3	0	12.7	5.6	7.5	0	14.4	5.1	3.9	0	1.6	0	9.1	0
																										R-HSA-5655253	0.173		0.191	0	0	31.3	0	7.7	3.6	0	0	4.3	11.7	0	1.6	26.2	0	1.5	0	0	0	12.1	0
																										R-HSA-5655291	0.191	0.1287		0	0	12.2	0.4	25.6	1.3	0	0	5.7	9.8	0	0	26.1	0	0.9	0	0	0	18.1	0
																										R-HSA-5655302	0.1287
																										R-HSA-5655332		0.1287		0	0	12.2	0.4	25.6	1.3	0	0	5.7	9.8	0	0	26.1	0	0.9	0	0	0	18.1	0
																										R-HSA-5655862	0.1287		0.3879	0	4.1	30.2	0	3.6	8.7	0	0	3.9	8.3	0	15.1	13.2	1.3	5.4	0	0	0	0.6	0
																										R-HSA-5656121	0.3879		0.3856	0	4	31.7	0.1	2.8	9.1	0.4	0	3.3	7.8	0	15.7	13.2	0	6.1	0	0	0	0	0
																										R-HSA-5656169	0.3856
																										R-HSA-5658442
																										R-HSA-5663084
																										R-HSA-5663202		0.1307		15.3	0	0	0	19.6	15	0	0	10.3	3.7	15.5	0	16.7	0	0	0	0	0	4	0
																										R-HSA-5663205	0.1307	0.2913		0	0.3	38.8	0.6	15.1	1.3	4.8	0	0	0	3.6	12.9	4.1	0	1.8	0	0	3.1	0.4	0
																										R-HSA-5663213	0.2913
																										R-HSA-5663220		0.2806		5	0	45.3	0	0	5.9	0	0	7.8	14.5	0	0	20.6	0	0	0	0	0	0	0
																										R-HSA-5666185	0.2806		0.1521	0	0	14	0	0	23.1	0	0	5.2	4.5	0	15.5	13.4	0.8	4.2	0	0	0	3.2	5
																										R-HSA-5668541	0.1521
																										R-HSA-5668599			0.2435	0	0	43.9	0	0	0	0	0	12.8	13.9	0	0.5	15.2	0	0.9	0	0	0	12.9	0
																										R-HSA-5668914	0.2435		0.1874	0	0	20.7	0	20.6	0	0	0	4.7	7.4	0.5	21.1	4.5	7.5	7.3	0	0	0	0	0
																										R-HSA-5669034	0.1874		0.2315	1.8	0	31.1	0	5.3	8.5	0	0	14.2	11.9	0	0	19.2	0	0.9	0.1	0	0	7.1	0
																										R-HSA-5673000	0.2315
																										R-HSA-5673001
																										R-HSA-5674135		0.2333		6	3.5	12.5	1.8	4.7	1.4	1.8	2.5	5.6	0	3.8	12.7	5.8	0.6	0	9	3.1	9.8	5.7	2.2
																										R-HSA-5674400	0.2333	0.184		0	0	32.9	2	25	16.1	0	0	11.3	2.2	2.7	0	0	0	0	0	7.7	0	0	0
																										R-HSA-5675221	0.184
																										R-HSA-5675482
																										R-HSA-5676590
																										R-HSA-5676594		0.1902		3.8	0	0.4	0	5.2	3.1	0	0	14.1	2.5	28.9	9.1	22.8	0	6.6	3.4	0	0	0	0
																										R-HSA-5678895	0.1902
																										R-HSA-5683057		0.1354		0	0	47.8	3.5	0	3.7	0	0	12.2	9.8	0	0	23	0	0	0	0	0	0	0
																										R-HSA-5683826	0.1354		0.2835	0	0	0	0	34.5	4.7	0	0	18	11.7	0	0	15.3	2.7	3.5	0.6	0	0	0.8	0
																										R-HSA-5684264	0.2835	0.1646		0	0	37.9	0	2.5	4.8	2.1	1.9	0	1.9	7.4	0	25	0	16.3	0	0	0	0	0
																										R-HSA-5684996	0.1646
																										R-HSA-5685938			0.1643	0	0	20.1	0	21.2	0	0	0	8.6	9.2	0	0	31.9	0	0.1	0	0	0.1	8.8	0
																										R-HSA-5685939	0.1643	0.1139		11.4	0	30.9	0	12.4	0	0	0	0	5.6	14.5	0	23.9	0	0	0	0	0	1.3	0
																										R-HSA-5685942	0.1139		0.2965	0	2.1	28.2	0	10.7	2.2	0	0	6.6	9.8	0	3.5	21	0.3	4.5	0	0	0	5.3	1
																										R-HSA-5686938	0.2965		0.353	0	0	29.6	3.6	8.6	4.6	0	0	7.6	8.9	5.5	10.1	14.1	2	0.2	0.7	1.1	0	0	1.9
																										R-HSA-5687128	0.353
																										R-HSA-5688426
																										R-HSA-5689603
																										R-HSA-5689877		0.109		0	0	85.2	0	0	0	0	0	0	0	0	0	0	0	14.8	0	0	0	0	0
																										R-HSA-5689880	0.109
																										R-HSA-5689896		0.2717		0	6.8	35.2	2.4	20.2	5.3	1.7	2.3	0	6	2.2	14.2	1.2	0	0.7	0	0	0.8	0.7	0
																										R-HSA-5689901	0.2717
																										R-HSA-5690714		0.2181		0	4.2	15.2	2.2	1.6	0.7	0	9.7	1.3	3	44.6	0	9.5	0	0	0.7	0	0	0	2.1
																										R-HSA-5693532	0.2181		0.2738	0.5	0	20.1	0.1	17.6	5.1	0	0	6.9	9.9	1.5	4	18	0	3.3	0	0	0	6.5	1.2
																										R-HSA-5693537	0.2738
																										R-HSA-5693538			0.2794	0	0	26.7	0.5	14.7	0	1.5	0	4.5	10.5	1.4	4.1	19.4	0	4.6	0	0	0	6.7	0
																										R-HSA-5693554	0.2794
																										R-HSA-5693565		0.2265		3.1	2.5	6.7	2.7	23.4	6	1.1	3.3	5.7	7.6	0	0	11.1	3.5	6.4	0	0	3	4.1	2.1
																										R-HSA-5693567	0.2265		0.2381	0	0	22.2	0	21	0	1	0	7.5	11.9	0	0	21	0	5.2	0	0	0	10.1	0
																										R-HSA-5693568	0.2381
																										R-HSA-5693571
																										R-HSA-5693579			0.1609	0	0	17.4	0	23.4	0	0	0	8.7	9	0	0	31.9	0	0	0	0	0.1	9.4	0
																										R-HSA-5693606	0.1609	0.2278		3	2.4	7.1	2.8	23.1	5.7	0.9	3.3	5.5	7.5	0	0	11.3	3.6	6.2	0	0	3.1	4.4	2.1
																										R-HSA-5693607	0.2278		0.2153	0	1.2	8.9	0	33	0	1.5	0	8.5	9	0	0	20.6	0	6.4	0	0	0	10.9	0
																										R-HSA-5693616	0.2153		0.1609	0	0	17.2	0	23.7	0	0	0	8.7	9.1	0	0	31.8	0	0	0	0	0.1	9.4	0
																										R-HSA-5694530	0.1609
																										R-HSA-5696394		0.3073		0	0	52	0	0	0	0.7	0	0	3.4	5.8	13.6	18.3	0	2.3	0	0	0	0.9	0
																										R-HSA-5696395	0.3073	0.2918		0	0	52.2	0	0	0	0	0	0	6.2	5.3	11.8	21.1	0	0	0	0	0	0	0
																										R-HSA-5696397	0.2918		0.3278	0	3.7	37.4	2.9	0	2	3.5	0	0	9.1	4.3	15.7	7.6	0	4.5	0	2.4	0.3	0	0
																										R-HSA-5696398	0.3278	0.3111		0	0	47.4	0	0	0	2	0	0	9.4	4.6	13.4	17.5	0	0.9	0	0	0	1.6	0
																										R-HSA-5696399	0.3111	0.2857		0	0	49.9	0	0	0	0	0	0	6.9	3.9	14.3	19.4	0	0	0	0	0	1	0
																										R-HSA-5696400	0.2857	0.3952		0	0.2	48.4	0	0	0	0	0	0	7.2	7.6	13.4	15.6	0	3	0	0	0	0	0
																										R-HSA-597592	0.3952	0.2189		0	0	10.1	0	12.7	7.4	0	0	12.9	11	10.2	0	15.4	0.7	0	1.8	0	0	17.7	0
																										R-HSA-606279	0.2189
																										R-HSA-611105
																										R-HSA-622312			0.3636	0	0.3	23.3	0	5.1	8.4	0	0	9.2	17.5	0	0	22.4	0	0	0	0	0	7.5	0
																										R-HSA-674695	0.3636	0.1755		0.9	0	32.9	4.8	2.4	8.1	0	0	1	16.4	0	15.9	15.4	0	0	0	0	0	2.2	0
																										R-HSA-6781823	0.1755	0.3069		0	0.5	49.7	0	0	1.1	0	0	0	8.5	0.7	14	18.1	0	5.2	0	0	0	2.3	0
																										R-HSA-6781827	0.3069	0.3354		0	1.1	49.4	0	0	0	1	0	0	10.3	1.8	17	15.6	0	3.8	0	0	0	0	0
																										R-HSA-6782135	0.3354	0.3665		0	1.7	47.5	0	0	1.3	0.6	0	0	10.5	2.4	16.7	15	0	4.4	0	0	0	0	0
																										R-HSA-6782210	0.3665	0.3747		0	2	46.6	0	0	1.6	1.1	0	0	10.5	2.4	16.3	14.7	0	4.8	0	0	0	0	0
																										R-HSA-6782315	0.3747	0.2496		0	0	49.9	3.1	3.1	0	0	0	0	0	0	28.3	15.5	0	0	0	0	0	0	0
																										R-HSA-6783310	0.2496		0.404	0	2.8	38.1	0	2.1	3.8	0	0	1.6	9.6	0	12.2	20.2	0	4.8	0	0	0	0	0
																										R-HSA-6783589	0.404
																										R-HSA-6783783		0.2508		0	0	47.4	0	0	2.2	0	0	9.9	4.3	0	16	14.4	0	3.1	0	0	0	2.7	0
																										R-HSA-6784531	0.2508	0.2666		0	0	40.9	0	0	6.3	1.4	0	0	4.8	0	14.5	24.6	0	3.5	0	0	0	0.4	0
																										R-HSA-6785807	0.2666	0.1008		0	0	39.5	3.6	0	0	0	0	1.5	7.3	0	0	44.7	3.3	0	0	0	0	0	0
																										R-HSA-6790901	0.1008	0.2805		0	0	44.5	2	3	0	5.5	0	0	0	4.2	21.6	11.3	0	0	0	0	0.6	0	0
																										R-HSA-6791226	0.2805	0.2536		0	0	43.2	0	11.9	0	6	0	0	0	9.4	15.8	0	0	1.7	0	0	1.2	0	0
																										R-HSA-6791312	0.2536	0.223		0	0	31.7	0	4.6	6.7	0	0	4.7	9.3	0	0	28.9	2.5	1.1	0	0	0	10.5	0
																										R-HSA-6794361	0.223	0.2549		0	0.9	50.1	0	20.9	0	0	0	4.1	4	0	5.5	13.4	0	0	0	0	0	0	0
																										R-HSA-6794362	0.2549	0.441		0	3.7	49.8	0	25	1.5	0	0	0	3.5	0	9	7.6	0	0	0	0	0	0	0
																										R-HSA-6796648	0.441		0.2968	0	0	33.4	0	3.8	8.7	0	0	6.6	15	0	5.8	23	0	2.8	0	0	0	1	0
																										R-HSA-6798695	0.2968		0.2739	0	0	26.2	0	14.4	2.7	0	0	9.2	9.4	0	8.5	19.4	0	2.8	0	0	0	7.4	0
																										R-HSA-6799198	0.2739
																										R-HSA-6802946		0.2341		8.3	4.1	14.3	2.9	6.1	2.2	2.2	5.7	6.7	0	7.4	15.4	5.5	0	0.4	0.6	0	0.8	3.1	2.7
																										R-HSA-6802948	0.2341	0.1977		6	4.1	16.7	1.7	5.4	0.7	0.1	4.6	8.9	0	4.4	22.2	8.1	0.1	0	0	0	0	0	3.6
																										R-HSA-6802949	0.1977	0.2015		5.7	2.7	8.1	4.2	11.1	9.5	4.1	4.9	14	2.4	10.7	7.3	0	0.9	0	0.5	0	0	0	1
																										R-HSA-6802952	0.2015	0.1092		15.1	1.4	12	4.3	6.3	2.9	0.7	0	12.1	0	8.7	18.9	0	1.4	0	0	0.7	0	0.3	0.5
																										R-HSA-6802955	0.1092	0.2341		8.3	4.1	14.3	2.9	6.1	2.2	2.2	5.7	6.7	0	7.4	15.4	5.5	0	0.4	0.6	0	0.8	3.1	2.7
																										R-HSA-6802957	0.2341
																										R-HSA-6803157
																										R-HSA-6803204		0.1381		0	0	29.9	10.9	15.2	4.4	0	3	0	0	0	14.2	6.5	1.3	0	0	9	0	0	0
																										R-HSA-6803205	0.1381
																										R-HSA-6803207
																										R-HSA-6803211		0.1781		6.1	0.7	53.2	0.8	10	0	0	0	11	0	0.5	4.1	12.1	0	0	1.5	0	0	0	0
																										R-HSA-6803529	0.1781	0.3753		0	0	47.9	0	11.6	0	0	0	0	6.6	4.3	12.2	17.2	0	0.2	0	0	0	0	0
																										R-HSA-6804114	0.3753
																										R-HSA-6804115			0.2196	0	0	41.8	0	0	0	0	0	0	7.6	0	3.5	32.8	0	0	0	0	0	8.5	0
																										R-HSA-6804116	0.2196
																										R-HSA-6804756		0.1839		0	0	9	0	23.2	8.9	0	0	16.4	7.5	0	0	20.5	0	2.5	3	0	0	9	0
																										R-HSA-6804757	0.1839		0.2472	0	0	8.7	2.5	15.4	18.1	1.5	4.1	11	13.2	0	0	14.7	0	3.6	2.3	0	0	4.8	0
																										R-HSA-6804758	0.2472		0.3783	0	3.2	34.5	0.3	0	8.9	1.8	0	6.9	10.5	5.4	8.9	14.3	0	4.8	0	0.4	0	0	0
																										R-HSA-6804759	0.3783
																										R-HSA-6804760			0.1399	0	0	0	3.9	28.2	15.1	0	0	13.8	0.3	0	0	19	0	10.8	7.7	0	0	1.2	0
																										R-HSA-6805567	0.1399		0.1864	1.3	0	40.2	5.7	0	0	0	0	0	0	0	0	45	0	0	0	0	0	7.8	0
																										R-HSA-6806003	0.1864		0.2757	0	0	4.5	1.5	18.5	18.5	1.4	1.9	14.5	15.2	0	0	13.2	0	3.6	0.8	0	0	6.5	0
																										R-HSA-6806667	0.2757
																										R-HSA-6806834		0.121		7.2	0	0	3.2	13.1	7.4	3.7	0	14	7.3	6	11.6	13	4.3	2.5	0	0.2	0.5	6	0
																										R-HSA-6807004	0.121
																										R-HSA-6807070
																										R-HSA-6807505
																										R-HSA-6807878
																										R-HSA-6809371			0.1864	1.3	0	40.2	5.7	0	0	0	0	0	0	0	0	45	0	0	0	0	0	7.8	0
																										R-HSA-6811434	0.1864
																										R-HSA-6811436
																										R-HSA-6811438
																										R-HSA-6811440
																										R-HSA-6811442
																										R-HSA-6811558		0.239		0	0	21.3	0	25	7.5	0	0.6	12.6	10.9	11	0	5.1	0	0	0	0	0	6	0
																										R-HSA-6814122	0.239
																										R-HSA-68689		0.2459		0	0	43.1	0	12.7	1.2	0	0	0	0	24.2	6.8	0	0	0	0	3.5	0	8.6	0
																										R-HSA-68827	0.2459
																										R-HSA-68867
																										R-HSA-68875		0.1912		0	0	0	0	32.1	2.8	4.8	0	8.9	10.6	0	0	19.7	0	0	0	0	0	21.2	0
																										R-HSA-68877	0.1912		0.2152	6.1	0	30.8	0	7.4	8.6	0	0	10.3	9.9	0	0	19.5	0	2.7	0	0	0	4.7	0
																										R-HSA-68882	0.2152	0.1368		0	0	57.4	0	0	2.6	0	0	0	0	0	8	30	0	0	0	0	0	2	0
																										R-HSA-68884	0.1368
																										R-HSA-68886		0.2144		0	0	50.3	0	0	0	0	0	0	7.9	0	4.5	27.8	0	0	0	0	0	9.5	0
																										R-HSA-68949	0.2144
																										R-HSA-68962			0.3467	0	0.5	42.3	2.6	0	0	1.5	0	0	10	0	17.9	16.9	0	0.7	0	1.4	0	0	0
																										R-HSA-69002	0.3467
																										R-HSA-69017
																										R-HSA-69052
																										R-HSA-69091
																										R-HSA-69109
																										R-HSA-69166		0.2981		0	2.4	35.3	6.3	0	0	3.2	0	0	11.7	5	18	5.8	0	0	0	5.1	0	0	0
																										R-HSA-69183	0.2981	0.3048		0	2.6	35.3	6.1	0	0	3	0	0	11.7	4.8	18.8	5.5	0	0	0	5.3	0	0	0
																										R-HSA-69186	0.3048	0.3516		0	3.1	35.1	5.4	0	0	3.6	0	0	12.1	2.8	18	7.6	0	1.5	0	3.8	0	0	0
																										R-HSA-69190	0.3516		0.35	0	2.8	36.4	5.2	0	0	3.1	0	0	10.4	1.7	18.8	8.8	0	2.3	0	4.9	0	0	0
																										R-HSA-69202	0.35
																										R-HSA-69205		0.1761		0	0	34.9	0	10.9	0	0	0	6.8	0.6	0	0	41.2	0	0	0	0	0	3	2.6
																										R-HSA-69206	0.1761
																										R-HSA-69231		0.1039		0	0	9.8	4.3	18.8	0	0	0.3	10	2	17.2	0	19.7	0	0	0	0	0	10.1	3.5
																										R-HSA-69236	0.1039	0.1039		0	0	9.8	4.3	18.8	0	0	0.3	10	2	17.2	0	19.7	0	0	0	0	0	10.1	3.5
																										R-HSA-69239	0.1039
																										R-HSA-69242		0.134		0	0	60	0	0	0.4	0	0	0	0	0	20.6	19.1	0	0	0	0	0	0	0
																										R-HSA-69273	0.134	0.2435		0	0	52.2	0	0	0	0	0	0	6	0	8.1	33.8	0	0	0	0	0	0	0
																										R-HSA-69275	0.2435	0.1163		0	0	55.5	4.4	22.4	2.9	0	0	0	0	0	8.9	1.3	0	0	0	4.6	0	0	0
																										R-HSA-69278	0.1163	0.2835		0	0	49.4	0	0	0	0	0	0	9.6	0	3.3	30.3	0	0	0	0	0	7.3	0
																										R-HSA-69306	0.2835
																										R-HSA-69416		0.2368		0	4.9	42	1.2	14	6.8	3.9	0	4.7	0	9.3	10.8	0	1.9	0.5	0	0	0	0	0
																										R-HSA-69473	0.2368	0.1781		0	0	48.2	0	0	0	0	0	0.9	11	0	0	22	0	0	0	0	0	18	0
																										R-HSA-69481	0.1781
																										R-HSA-69541
																										R-HSA-69563
																										R-HSA-69580
																										R-HSA-69601
																										R-HSA-69610
																										R-HSA-69613
																										R-HSA-69615
																										R-HSA-69618		0.1851		0	0	30.5	0	9	1.9	0	0	3.9	10.2	0	0	28.4	0	0	0	0	0	16.1	0
																										R-HSA-69620	0.1851	0.1607		0	0	54	0	0	5.6	0	0	0	0	0	0	33	0	0	0	0	0	7.4	0
																										R-HSA-69656	0.1607
																										R-HSA-70171		0.1888		0	1.4	29.2	0	20.1	0	8.5	0.4	7	6	0	9.4	3.8	0	0	0	7.7	0	0	3.5
																										R-HSA-70221	0.1888	0.3243		2.5	2.6	28.9	0.4	10.2	5.3	0.3	1.8	0.6	9.3	7.8	6.9	0.6	1.2	1.4	0.8	0	0	0.8	0
																										R-HSA-70263	0.3243	0.1731		0	0	41.1	0	38.4	0	0	0	8.1	2.4	0	0	0	0	0	0	10	0	0	0
																										R-HSA-70268	0.1731		0.18	0	6.1	33.4	0	31.7	1	0	0	6.3	5.3	0.4	0	0.6	3.8	0.4	0	0	2	0	3.5
																										R-HSA-70326	0.18	0.2278		0	2.4	29.9	0	22	0	6.6	1.7	7.4	4.8	0	10	3.5	0	0	0	7	0	0	2.7
																										R-HSA-70895	0.2278	0.1707		3.6	0	41.3	0	6.3	0	0	0	0	0	9.7	0	24.7	0	0	0	0	0	7.6	5.6
																										R-HSA-71240	0.1707		0.1946	0	2.2	0	0.9	30.2	10.4	0	8.8	10.9	15.4	0	2.7	0	7.5	11	0	0	0	0	0
																										R-HSA-71291	0.1946	0.2355		0	0	39.4	0.7	20	0	4.9	0	0	0	6.7	10	0	0	0	0	0	4.2	0	0
																										R-HSA-71336	0.2355		0.192	0	0	26.3	0	10.1	0	5.1	0	10.9	14.1	0	0	12.3	0	3.7	0	0	0.4	11.2	0
																										R-HSA-71387	0.192		0.1646	0	0	14.7	0	17.4	0	4.6	0	12.2	20.5	0	6.3	5.2	0	0.4	0	0	1.1	4.8	0
																										R-HSA-71403	0.1646	0.2466		0	0	50.6	0	27.7	5.5	1.8	0	0.5	0	0	5.4	5.6	0	0	0	1.4	1.4	0	0
																										R-HSA-71406	0.2466	0.3053		0	4.9	39	0	27.3	5.4	2.8	0	5.7	0	0	6.3	0	0	0.8	0	2.1	1.5	0	1.2
																										R-HSA-72086	0.3053	0.2407		0	0	43.2	4.1	5.1	0	4	0	0	7.3	5.8	19.1	9.6	0	0	0	2	0	0	0
																										R-HSA-72163	0.2407	0.3374		0	0	46.5	1.5	11	0	0	0	0	5.2	6.6	12.8	15.3	0	0	0	1.2	0	0	0
																										R-HSA-72165	0.3374	0.2919		0.3	0	45.2	2.4	15.4	0	1.4	0	0	1.1	6	13.7	6.8	2.3	1.1	0	3.3	0	1	0
																										R-HSA-72172	0.2919	0.3297		0	0	46.3	1.6	11	0	0	0	0	5.3	6.5	12.8	15.3	0.1	0	0	1.2	0	0	0
																										R-HSA-72187	0.3297		0.2141	0	0	45.3	0	0	0	0	0	0	0	8.9	8.6	35.5	0.9	0.8	0	0	0	0	0
																										R-HSA-72202	0.2141		0.2883	0	0	45.4	0	0	0	0	0	0	0	0	14.2	34.6	0	5.8	0	0	0	0	0
																										R-HSA-72203	0.2883		0.311	0	0	47.6	0	0	0	0	0	0	4.3	6.2	17.5	23.6	0	0.6	0	0	0	0	0
																										R-HSA-72306	0.311	0.2848		0	0	47.5	0	0	1.6	1.9	0	0	3.7	0	19.7	24.2	0	1.4	0	0	0	0	0
																										R-HSA-72312	0.2848	0.266		0	0	43.3	0	11.5	0	6.1	0	0	0	8.2	17.6	0	0	1.6	0	0	1.4	0	0
																										R-HSA-72613	0.266	0.2783		0	0	42.5	0	15.8	0	5.9	0	0	0	8.7	13	0	0	1.2	0	0	1.5	0	0
																										R-HSA-72649	0.2783	0.3391		2.7	2.8	36.2	0.1	18.6	2.9	3.9	0	0	0	5.4	13.2	1.1	0	1.2	0	0	0.5	0	0
																										R-HSA-72662	0.3391	0.339		2.7	2.8	36.2	0.1	18.6	2.9	3.9	0	0	0	5.4	13.2	1.1	0	1.2	0	0	0.5	0	0
																										R-HSA-72689	0.339	0.2583		0	0	41.7	0	14.8	0	6.4	0	0	0	9.6	12.5	0	0	1.2	0	0	1.7	0	0
																										R-HSA-72695	0.2583	0.3168		3	2.3	35.7	0.2	18	3.4	4.2	0	0	0	6	14.1	0	0	1.1	0	0	0.4	0	0
																										R-HSA-72702	0.3168	0.3412		2.3	2.6	36.8	0.1	18.5	2.8	4	0	0	0	5.4	13.3	1.3	0	1.2	0	0	0.6	0	0
																										R-HSA-72706	0.3412	0.2769		0	0	42.4	0	15.7	0	6	0	0	0	8.8	12.9	0	0	1.2	0	0	1.5	0	0
																										R-HSA-72737	0.2769	0.2783		0	0	42.5	0	15.8	0	5.9	0	0	0	8.7	13	0	0	1.2	0	0	1.5	0	0
																										R-HSA-72764	0.2783	0.209		0	0	42.7	0	11.8	0	6.3	0	0	0	11.6	12.2	0	0	1.2	0	0	1.3	0	0
																										R-HSA-72766	0.209	0.285		0	0	40.9	0	18.1	0.4	5.4	0	0	0	6	12.6	0	0	0.9	0	0	2.7	0	0
																										R-HSA-73614	0.285		0.207	0	0	23.9	0	9.9	9.8	0	0	10.8	9.4	0	0	18.7	0	11.2	2.5	0	0	3.7	0
																										R-HSA-73728	0.207	0.1295		2.6	0	45	2.3	0	0.8	0	0	9.5	2.2	0	7.8	25.3	0.6	2.2	0	0	1.8	0	0
																										R-HSA-73762	0.1295	0.3058		0	0	50.2	0	0	0	0	0	0	5.7	0.4	20.2	23.5	0	0	0	0	0	0	0
																										R-HSA-73772	0.3058
																										R-HSA-73776
																										R-HSA-73779
																										R-HSA-73780
																										R-HSA-73817		0.1711		0	5.1	20.7	5.1	14.6	0	2.8	1.4	16.2	0	0	23.9	0	0	2.3	0	7.9	0	0	0
																										R-HSA-73854	0.1711
																										R-HSA-73856			0.2288	0	0.1	46.4	0	1.9	0	0	0	0	0	9.8	8.9	30.4	2	0.3	0	0	0	0	0
																										R-HSA-73857	0.2288		0.2625	0	0	10.4	0	21.1	11.2	0	0	11.1	12.9	0	2.1	18.8	0	2.9	0	0	0	9.5	0
																										R-HSA-73863	0.2625	0.1465		0	0	49.1	6.3	0	1.1	3	0	0	0	1.9	18.1	20.5	0	0	0	0	0	0	0
																										R-HSA-73864	0.1465
																										R-HSA-73884
																										R-HSA-73886		0.1581		0	0	42.6	5.4	0	0	0	0	0	12.7	0	9.4	18.6	0	0	0	0	0	0	0
																										R-HSA-73887	0.1581
																										R-HSA-73893
																										R-HSA-73894		0.2072		0	0	17.4	2.7	23.1	0	0.1	0	0	8.9	0	8.9	21.7	0	1.7	0	0	0.7	6.9	0
																										R-HSA-73927	0.2072
																										R-HSA-73928
																										R-HSA-73929
																										R-HSA-73933		0.3162		0	0	38.7	3.4	0	0	3.7	0	0	6.5	18.7	7.7	10.6	0	0	0	2.8	0	0	0
																										R-HSA-73980	0.3162
																										R-HSA-74158		0.1974		0.9	5.2	40.5	4.7	7.8	3.8	0	0	3.9	8.2	0	13.4	7	0	0.3	0	0	0.9	3.3	0
																										R-HSA-74160	0.1974		0.2613	0	0	17.1	0	15.9	10.8	0	0	10.1	12	0	3.6	19.7	0	2.8	0	0	0	8.1	0
																										R-HSA-74217	0.2613
																										R-HSA-74259		0.1543		0	0	14.3	3.3	18.8	2.5	0	2.5	6.4	2	0	0	31.9	0	1.7	0	1.9	0	4.5	0.3
																										R-HSA-74751	0.1543	0.1599		0	0	36.2	0	21	14.7	0	0	11	0	8.7	0	0	0	0	0	0	0	8.3	0
																										R-HSA-74752	0.1599	0.3526		0	0	50.1	0	1.7	10.3	0	0	0	1.9	14.4	4.1	12.3	0	0	0	0	0	0	0
																										R-HSA-749476	0.3526	0.1873		1.8	4.4	39	4.7	8.1	2.5	0	0	2	6.9	0	11.3	7.8	0	0	0	0	1.5	2.8	3.5
																										R-HSA-75035	0.1873	0.2324		0	0	47.8	0	16.1	11	0	0	0	4.3	0	0	7.4	0	1.1	0	0	0	7	0
																										R-HSA-75067	0.2324	0.2339		0	0	47.8	0	1.8	0	0	0	0	8.3	4.7	14	21.6	0	0	0	0	0	1.7	0
																										R-HSA-75105	0.2339	0.1455		0	0	33.9	5.9	0	0	12.5	0	0	0	26.8	5.7	0	0	0	0	0	0	6.2	0
																										R-HSA-75153	0.1455
																										R-HSA-75205			0.3072	0	1	25.1	0.2	33.5	8.5	0	1.6	6.8	1.7	0	0	7	0.9	4.9	1.2	0	0	0	0
																										R-HSA-75815	0.3072
																										R-HSA-75876		0.2305		0	0	35.6	4.2	4.1	0	8.3	0	0	0	14.1	13.3	0	0	1.6	0	0	0	7.6	0
																										R-HSA-75892	0.2305	0.1432		0	0	42.6	0	4.9	13.8	13.7	0	2.7	0	1.7	0	5.9	6.8	0	0	0	7.8	0	0
																										R-HSA-75893	0.1432
																										R-HSA-75953
																										R-HSA-75955		0.2427		0	0	39.2	4	0	5.4	0	0	0	15.6	0	21.3	13.1	1.3	0	0	0	0	0	0
																										R-HSA-76002	0.2427
																										R-HSA-76005
																										R-HSA-76009
																										R-HSA-76042
																										R-HSA-76046		0.2148		0	5.2	38.5	4.7	4.8	5.5	0	0	6.3	9	0	14.7	6.3	0	1.4	0	0	0	3.5	0
																										R-HSA-76061	0.2148	0.2288		0	4.6	38.4	5.2	11.3	4.2	0.8	0.3	3.2	7.4	0	12.7	5.3	0	1.3	0	2.3	2.1	0.9	0
																										R-HSA-76066	0.2288	0.2043		5.9	3.5	40.1	2.9	6.6	6.9	0	0	7.7	7.4	0	7.5	10.6	0	0.9	0	0	0	0	0
																										R-HSA-76071	0.2043
																										R-HSA-77075		0.215		1.1	2.6	32	5	9.1	4.2	2	0	3.7	7.1	5.2	17.6	3.1	2	1.4	0	1.5	0	2.2	0
																										R-HSA-77289	0.215	0.1782		0	0	26.2	3.5	34.2	9.5	0	0	12.3	6.7	0	0	0	0	0	0	5.7	0	0	0
																										R-HSA-77387	0.1782		0.1843	4.7	0	28	0	15.9	0	0	0	12.9	7.3	0	0	24.5	0	2.8	0	0	0	3.9	0
																										R-HSA-774815	0.1843
																										R-HSA-77588
																										R-HSA-77595			0.1439	0	0	43.2	0	0	0	0	0	3.1	5.7	0	9.8	32.4	0	0	0	0	0	5.8	0
																										R-HSA-844456	0.1439		0.361	0	0	16.1	0	20.7	3.2	0	0	11	15.9	0	0	22.9	0	0	3.8	0	0	6.4	0
																										R-HSA-877300	0.361		0.1557	0	0	0	0	0	45.1	5	0	26.5	8.8	0	0	0	0	5.5	5.9	0	0	3.3	0
																										R-HSA-877312	0.1557		0.1224	0	0	40.9	1.9	0	2.7	6.8	0.6	0.2	9.8	9.9	19.2	0	4.3	3.6	0	0	0	0	0
																										R-HSA-879415	0.1224		0.1673	0	0	0	0	35.9	0	0	0	0	24.6	0	1.7	24.7	0	0	0	0	1.8	0	0
																										R-HSA-881907	0.1673	0.1049		1.3	2.6	17.3	7	18.2	6.6	2.1	0	9.3	3	11.6	0.8	5.6	3	0	0	0	1.9	9.6	0
																										R-HSA-8848021	0.1049	0.1206		2.3	2	27.6	4.9	24.4	5.5	0	0.2	8.8	2	0	12.8	5.6	0	2.4	0	0	0.5	0.8	0
																										R-HSA-8849471	0.1206	0.1316		4.6	5.1	22.9	2.9	13.7	1.4	0	1.6	6.7	0	4.2	20.5	4.2	0	1	0	0	0	3.3	0
																										R-HSA-8849932	0.1316	0.3063		5.3	1.4	49.8	0	17.2	0	0	0	5.8	5.9	0	0	11.4	0	0	0	0	0	3.3	0
																										R-HSA-8851708	0.3063	0.184		0	0	43.8	4.8	10	0	3.6	0	0	8.1	4.5	14.2	9.2	0	0	0	1.7	0	0	0
																										R-HSA-8851805	0.184
																										R-HSA-8852135		0.1159		0	0	0	0	39.2	0	0	0	0	22.7	0	0	10.4	0	0	0	0	0	27.7	0
																										R-HSA-8852276	0.1159
																										R-HSA-8853338		0.1287		0	0	12.2	0.4	25.6	1.3	0	0	5.7	9.8	0	0	26.1	0	0.9	0	0	0	18.1	0
																										R-HSA-8853659	0.1287	0.1373		0	0	17	0	13.7	34.9	0	0	19.8	6.1	0	0	4.8	0	0	0	0	0	3.7	0
																										R-HSA-8854050	0.1373
																										R-HSA-8854214		0.111		0	0	43.1	2.6	13.6	12.4	0	4.1	0	0	0	9.2	2.8	0	0	0	0	0	0	10.2
																										R-HSA-8854518	0.111	0.1333		4.1	0	43.1	4.9	0	10.6	0	0	2	11.4	0	10.3	7.4	1.9	4.4	0	0	0	0	0
																										R-HSA-8854691	0.1333
																										R-HSA-8856688
																										R-HSA-8856825		0.3376		0	4.3	31.9	0.7	15.1	0	0.4	1.7	7.2	1.6	7	18.7	5.9	0	0	1	0	0	4.6	0
																										R-HSA-8856828	0.3376
																										R-HSA-8862803		0.1772		0	0	37.1	0.3	37.2	0	0	1.3	0	0	0	0	5.1	0	0	5.5	0	0	0	0
																										R-HSA-8863678	0.1772	0.1772		0	0	37.1	0.3	37.2	0	0	1.3	0	0	0	0	5.1	0	0	5.5	0	0	0	0
																										R-HSA-8863795	0.1772	0.1386		0	0	31.1	1	3.1	10	0	0	26.2	10.5	0	0	0	0	11.2	0	6.8	0	0	0
																										R-HSA-8864260	0.1386	0.1631		4.1	0.2	25.4	1.1	0	9.7	2.7	2.3	4.3	3.3	1.9	6.6	13.2	4.3	0.9	0	0	1.2	2.5	4.1
																										R-HSA-8866427	0.1631
																										R-HSA-8866652
																										R-HSA-8866654
																										R-HSA-8868766		0.1651		1	0	35.6	2.2	0	0	3.9	0	7.3	0	3.5	38.5	0	0	0	0	0	8.1	0	0
																										R-HSA-8868773	0.1651	0.266		0	0	43.2	0	11.5	0	6.1	0	0	0	8.3	17.4	0	0	1.7	0	0	1.4	0	0
																										R-HSA-8873719	0.266	0.2794		0	0.5	41.8	0	0	0	1	0	0	0	8.1	24.9	3.6	3.6	6.2	0	0	0	8.2	0
																										R-HSA-8874081	0.2794	0.1831		0	0	38.4	0.1	0	0	8.1	0	8.7	12.8	0	0	11.3	0	1.4	0	0	0	12.1	0
																										R-HSA-8875360	0.1831
																										R-HSA-8875555		0.112		3.4	2.5	1.6	0	0	1.8	0	0	20.9	11.8	0	37.3	10.3	2.1	0	3	0	0	5.2	0
																										R-HSA-8875878	0.112	0.1358		6.9	0	17.2	1.1	5.9	0	0	0	14.9	9.9	0	26.9	10.5	0.6	0.9	0	0	0	5.3	0
																										R-HSA-8876198	0.1358	0.1363		7	3	16.6	3.8	4.2	2	2.7	2.4	10.3	1.7	14.9	14.1	0	1.1	0	0	0	0	3.5	0
																										R-HSA-8876384	0.1363
																										R-HSA-8876725		0.3895		0	0	48.2	0	9.1	0	2.3	0	0	4.1	3.3	16.2	12.3	0	1	0	0.8	0	0	0
																										R-HSA-8878159	0.3895	0.2017		0	0	53.7	1.5	0	0.6	0	0	0	4.6	0	17.1	19.4	0	0	3.1	0	0	0	0
																										R-HSA-8878166	0.2017
																										R-HSA-8878171
																										R-HSA-8934593		0.1434		3.1	0	25.8	1.2	8.1	10	0	0	12	6.7	0.5	0	24.5	0	0	0	0	0	8	0
																										R-HSA-8934903	0.1434
																										R-HSA-8936459		0.1072		0	0	31.4	0	37.3	11.4	0	0	12.5	0	0	0	0	0	2.9	0	4.3	0	0	0
																										R-HSA-8939211	0.1072	0.154		0	0	25.2	3.3	27.1	11.9	0	0	10.7	7.5	3.9	0	0	0	0	0	4.7	0	5.6	0
																										R-HSA-8939236	0.154
																										R-HSA-8939243			0.2196	4.6	0	13.3	3.3	16.8	15.4	0	0	18.2	8.4	0	0	11.4	0.3	3.6	0	0	0	4.8	0
																										R-HSA-8939902	0.2196
																										R-HSA-8940973		0.1995		0	0	7.8	4.3	7.5	6	0	0	8.3	7.8	13.6	0	5.6	0	1.1	0	0	5	23.2	0
																										R-HSA-8941326	0.1995	0.1998		0	0	11.3	5.4	11.2	7.8	0	0	8.8	7.3	11.8	0	5.1	0	0	0	0	1.3	20.3	0
																										R-HSA-8941856	0.1998	0.1036		0	0	30.4	0	28	20.1	0	0	13.5	3.6	0	0	0	0	0	0	4.4	0	0	0
																										R-HSA-8941858	0.1036
																										R-HSA-8943724			0.3136	0	0	21.7	0	0	21	0.2	0	0	13.6	0	21.7	14.5	0.3	0	0	0	0	0	0
																										R-HSA-8948216	0.3136
																										R-HSA-8948751
																										R-HSA-8949215		0.1554		0	0	38.8	1.6	23.2	3.6	0.6	0	8.2	0	0	15.3	0	0	4.5	0	1.9	2.4	0	0
																										R-HSA-8949613	0.1554	0.195		0	0	44.4	5.7	28.2	0	0	0	0	0	0.4	6.6	0	0	0	0	0	3	0	0
																										R-HSA-8949664	0.195	0.1338		0	0	40.9	0	21.5	1.6	0.3	0	7.3	0	0	19.9	0	0	5.4	0	3	0	0	0
																										R-HSA-8950505	0.1338	0.1443		0	0	55.7	0	18.4	8.5	0	0	0	0	0	2.2	15.2	0	0	0	0	0	0	0
																										R-HSA-8951664	0.1443
																										R-HSA-8951936		0.2732		8.1	1.9	15.9	3.4	7.5	10.6	0	0	21.7	12.4	8.5	1.8	6.8	0	0.6	0	0	0.7	0	0
																										R-HSA-8953750	0.2732	0.1431		0	0	19	0	22.8	0	0	0	9.3	6.9	0	0	24.2	0	0	0	0	0	17.8	0
																										R-HSA-8953854	0.1431	0.3106		0	0	50.3	0	12.4	0	1.9	0	0	0	6.8	18.2	9.5	0	0.5	0	0	0.4	0	0
																										R-HSA-8953897	0.3106
																										R-HSA-8955332
																										R-HSA-8956319		0.3198		0	0	18.8	0	9.9	14.3	0	0	11.3	9.5	0	0.8	21.5	3.3	3.3	0.2	0	0	0	0
																										R-HSA-8956320	0.3198	0.1974		0	4.7	19.5	4.9	10.8	0	3.6	1	13.8	0	0.1	22.3	0	1.1	0.4	0	7.3	0	0	2.2
																										R-HSA-8956321	0.1974		0.1737	0	0	25.4	0	12	6.4	0	0	10.6	3.4	0	0	26.1	0	6.1	0	5.9	0	4.2	0
																										R-HSA-8957275	0.1737		0.1751	0	0	4.9	0	32.4	0	0.3	4.7	0	8.2	0	0	23.4	0	4.9	0	0	6.8	2.3	0
																										R-HSA-8957322	0.1751
																										R-HSA-8963899
																										R-HSA-8964038		0.337		0	5.9	38.1	3.2	26.1	0	0	0.8	0	0	0	7.7	4.2	1.9	0	0	0	0	2.8	2.1
																										R-HSA-8964043	0.337	0.1929		2.1	6.1	28.5	7.2	31	0	0.7	3.4	1	0	0	5.6	0	3.9	4.1	3	0	0	3.5	0
																										R-HSA-8964315	0.1929	0.2977		0	0	47.6	0	0	0	5.7	0	0	0	0	19.4	27.3	0	0	0	0	0	0	0
																										R-HSA-8964539	0.2977		0.2549	0	0	42	0	0	0	0	0	5.9	1.4	0	0	48.4	0	0	0	0	0	2.5	0
																										R-HSA-8964616	0.2549	0.2772		0	0	47.8	0.6	9.4	0	4.7	0	0	0	4.7	20.1	12	0	0.7	0	0	0	0	0
																										R-HSA-8978868	0.2772		0.2632	0	0	26.4	0	18.4	0	0	0	10.1	10.8	0.7	5.5	20.2	0	3.2	0	0	0	4.7	0
																										R-HSA-8978934	0.2632	0.175		0	0	47.2	3.8	10.8	22.9	0	0	0	0	0	0	12.5	0	0	0	0	0	0	0
																										R-HSA-8979227	0.175	0.3471		1.7	5.3	36.7	2.2	25	0.8	1.9	1	2	0.9	4.8	8.4	0	1.5	1.7	0	1	0	5.2	0
																										R-HSA-8982491	0.3471	0.1593		0	0	36.4	0	3.9	0	0	0	0	10.2	22.9	3	0	0	0	0	0	0	0	0
																										R-HSA-8983432	0.1593	0.2682		0	0	22	0	31.8	1.3	0	7.2	13.8	5.6	2.4	0	0	0.9	1.9	0	0	1.6	0	0
																										R-HSA-8984722	0.2682
																										R-HSA-8986944			0.1259	0	0	0	1.4	19.3	25.4	0	0	20.3	10.6	0	0	13.6	0	1.7	0	6	0	1.7	0
																										R-HSA-9005891	0.1259		0.3138	0	3.7	28.3	0	1.8	19.7	0	0	0	8.3	0	25.6	12.3	0	0	0	0.2	0	0	0
																										R-HSA-9005895	0.3138		0.3138	0	3.7	28.3	0	1.8	19.7	0	0	0	8.3	0	25.6	12.3	0	0	0	0.2	0	0	0
																										R-HSA-9006115	0.3138	0.2271		0	0	40.1	0	2.8	0	0	0	5.3	9.2	0	0	34.1	0	0	0	0	0	8.6	0
																										R-HSA-9006335	0.2271
																										R-HSA-9006921
																										R-HSA-9006925			0.3013	0	0	31.3	0	3.1	13.8	0	2.8	0	12.2	0	17.9	18.9	0	0	0	0	0	0	0
																										R-HSA-9006927	0.3013	0.1206		2.3	2	27.6	4.9	24.4	5.5	0	0.2	8.8	2	0	12.8	5.6	0	2.4	0	0	0.5	0.8	0
																										R-HSA-9006931	0.1206	0.1488		0	0	30.6	3.2	28.1	10.2	0	0	8.7	4.5	5.5	0	0	0	0	0	5.2	0	4	0
																										R-HSA-9006934	0.1488
																										R-HSA-9006936		0.2101		0.9	1.1	12.9	4.4	24.7	10.3	0.3	5	12.7	5.2	0	4.3	3.9	2.9	1.3	0.5	0	4.9	4.6	0
																										R-HSA-9007101	0.2101	0.1318		0	0	31.3	0	7	5.8	0	2.7	5.7	0	3.5	15.7	1.7	0	0	0	5.8	0	0	2.2
																										R-HSA-9008059	0.1318	0.2432		8.3	0	8.3	0.7	14.7	0	2.9	1.3	17.3	5.2	10	17.7	4.3	2.2	4.1	0	0	1.2	1.8	0
																										R-HSA-9009391	0.2432	0.2307		0.9	1.5	22.8	4.8	15.4	8.1	2.2	0.2	10.5	3.8	5.3	8.7	0	2.1	0	2	0	0	5.2	2.1
																										R-HSA-901032	0.2307
																										R-HSA-901042			0.3057	0	0	46.9	0	7.7	2.3	1.9	0	5.4	6.7	4.5	2.6	11.9	0	6.6	0	0	0	3.6	0
																										R-HSA-9010553	0.3057	0.2022		0	0	43.2	0	16.9	0	4.2	0	0	0	9	10.7	0	0	0	0	0	3.2	0	0
																										R-HSA-9012852	0.2022
																										R-HSA-9013507
																										R-HSA-9013508
																										R-HSA-9013694
																										R-HSA-9013695
																										R-HSA-9013700			0.1238	0	0	3	0	17.9	18.3	0	2.9	6	1.4	0	26.7	5	0	13.8	0	0	0	0	0
																										R-HSA-9013973	0.1238
																										R-HSA-9014325		0.1057		0	0	0	7.2	28.9	14.7	0	6.3	8	0	0	0	15.7	0	6.2	6	0	0	6.8	0
																										R-HSA-9018519	0.1057
																										R-HSA-9018677		0.2315		0	0	39.8	0	2	0	0	4	11.4	17.9	0	4.3	18	0	0	0	0	0	2.6	0
																										R-HSA-9018678	0.2315	0.2399		1.1	0	45.6	0	0	0	0	1.4	10.9	13.4	0	8	10.2	0	5.8	0	0	0	3.6	0
																										R-HSA-9020558	0.2399
																										R-HSA-9020591		0.1894		0	0	45.1	0	24.7	7	0	0	0	0	0	0	10.7	0	0	3.4	0.8	0	0	2.9
																										R-HSA-9020702	0.1894		0.1125	0	0.9	8.6	5.3	20.6	8	0	0	19.6	12.2	0	0	10.7	0	4.1	3.6	0	6.4	0	0
																										R-HSA-9020933	0.1125	0.1105		0	0	44	0	0	0	0	0	0	0	18.1	19.9	1.1	0	0	0	0	0	4.7	0.6
																										R-HSA-9020956	0.1105
																										R-HSA-9022692			0.1341	0	0	1.3	3.2	20.1	23.9	0	0	14.2	6.3	0	9.5	14.9	0	1.4	0	0	2.6	2.5	0
																										R-HSA-9022699	0.1341	0.2624		0	0	0	0	29.7	15.8	0	2.1	21.6	15.3	0.5	0	10	0.6	0.7	0	3.8	0	0	0
																										R-HSA-9027276	0.2624	0.1796		6.7	0	28	1.1	13.6	8.2	2.1	0	9.9	1.1	12.4	5.9	0	0	0.5	0	2.8	0	0	2.6
																										R-HSA-9027284	0.1796	0.1073		3.5	0	28.7	1.7	0	3.2	0	0	13.4	0	4.4	29.8	0	0	0	0	0	0	0	4.2
																										R-HSA-9028731	0.1073
																										R-HSA-9033241
																										R-HSA-9033658		0.2873		0	0	54.3	0	3.8	2.2	1.5	0	0	0	21.1	0	14.2	0	2.2	0	0.6	0	0	0
																										R-HSA-9034015	0.2873	0.1991		0	0	37.6	0	5.2	3.4	0	0	0	8.3	0	11.5	26.8	0	2.2	0	0	0	5	0
																										R-HSA-9037629	0.1991	0.2871		0	0	54.4	0	3.7	2.2	1.4	0	0	0	21.1	0	14.3	0	2.3	0	0.7	0	0	0
																										R-HSA-909733	0.2871		0.166	0	0	4.1	0	0	36.1	5	0	19.7	13.9	0	0	0	0	7.9	8	0	0	2.2	0
																										R-HSA-912446	0.166
																										R-HSA-912526		0.1652		0	0	21.9	1.4	22.9	4.2	0	8.7	10.5	4.2	6.9	0.9	0	0	3.1	0	0	4.7	0	0
																										R-HSA-912631	0.1652
																										R-HSA-912694		0.1073		0	0	25	0	0	17	14	0	21.2	9.4	0	0	0	7.6	1.2	4.7	0	0	0	0
																										R-HSA-913531	0.1073		0.1437	0	0	0	0	0	43.3	7.8	0	22.6	11.1	0	0	0	0	8.6	6.4	0	0	0	0
																										R-HSA-913709	0.1437	0.3534		3	2.5	38.2	0.7	30.9	0	0	0	7	0	0	12.7	0	0	0	0	1.8	0.2	0	0
																										R-HSA-917729	0.3534
																										R-HSA-917937			0.1268	8.7	0	18	0	23	3.1	0	0	15.1	6.1	0	0	25.6	0.2	0	0	0	0	0	0
																										R-HSA-917977	0.1268		0.1899	4.5	0	27.1	0	17.1	0	0	0	13.8	7.5	0	0	24.6	0	2.2	0	0	0	3.2	0
																										R-HSA-918233	0.1899
																										R-HSA-927802		0.2261		0	0	41.8	0	12.2	0.2	6.7	0	0	0	10.8	12.8	0	0	1.5	0	0	1.5	0	0
																										R-HSA-933541	0.2261
																										R-HSA-933542			0.1986	0	4.9	30.6	0.9	0	9.3	8.5	0	10	18.2	0	2.7	11.3	0.6	2.1	0.8	0	0	0	0
																										R-HSA-933543	0.1986
																										R-HSA-936440		0.1819		1.5	3.3	8.6	0.1	8.5	7.8	0.5	4.5	3.8	4.3	2.1	1.7	4	0.9	2.7	20.8	1.1	18.2	5.7	0
																										R-HSA-936837	0.1819		0.1899	0	0	19.1	3.9	10.2	10.9	1.3	0	18.5	10.5	0	0	14.2	0	1	0	0	4.3	5.9	0
																										R-HSA-936964	0.1899		0.1444	0	0	29.6	0	8.9	0	0	0	6.8	10.5	0	17.4	12.1	14.7	0	0	0	0	0	0
																										R-HSA-937039	0.1444
																										R-HSA-937041
																										R-HSA-937042		0.1099		0	0	0	7	28.9	14.4	0	6.5	9	0	0	0	15	0	6.3	6.4	0	0	6.3	0
																										R-HSA-937061	0.1099		0.2936	0	3.9	37.4	5.7	0	0	0	0	0	6.3	0	20.8	10.1	0.8	0.2	0	0	0	3.8	2.5
																										R-HSA-937072	0.2936		0.1527	0	0	37.7	2.3	0	0	0	0	7.1	9.9	0	11.8	14.7	16.4	0	0	0	0	0	0
																										R-HSA-948021	0.1527	0.111		2.9	0	40.2	2.4	0	0	14	0	18.7	16.8	0	0	0	1.8	1.9	0	0	0	1.4	0
																										R-HSA-9603798	0.111	0.1705		0	0	37.6	0	0	0	0	0	0	13.1	0	0	32.1	0	0	12.1	0	0	5.2	0
																										R-HSA-9604323	0.1705
																										R-HSA-9607240		0.1242		0	0	21.7	12	2.4	6.1	0	9.5	8.7	12.7	10.4	0	13.6	0	0	0	0	2.8	0	0
																										R-HSA-9609507	0.1242	0.2094		0	0	49.4	0	34.7	0	0	0	3.1	0	0	9.9	0	0	0	0	0	2.9	0	0
																										R-HSA-9609523	0.2094	0.1487		0	5.2	35.2	0	37.6	0	0	0.4	0	0	0	0	9	0	1.5	0	0	2.3	0	0
																										R-HSA-9609736	0.1487	0.1154		0	0.9	35.8	0	10.9	0	0	0	0	0	0	0	35.2	0	0	0	0	0.8	4	3.8
																										R-HSA-9612973	0.1154
																										R-HSA-9613354			0.1246	0	0	0	0	23.3	25.7	0	0	22.1	2.8	0	0	0	0	15.9	0	0	0	10.2	0
																										R-HSA-9613829	0.1246
																										R-HSA-9614085		0.1532		1.4	1.4	18.1	2.2	24.4	12.2	0.3	0	12.7	7.1	0	7.4	2.5	0	3.6	1.7	0	0	4.9	0
																										R-HSA-9614399	0.1532	0.1854		0	5.5	19.4	4.1	7.4	17.5	0	0	15.1	23.3	0	0	2.4	0	0	0	0	0	5.4	0
																										R-HSA-9614657	0.1854	0.2338		0	0	49.3	0	28.6	14.6	0	0	0	0	0	0.3	7.1	0	0	0	0	0	0	0
																										R-HSA-9615017	0.2338		0.1353	0	4.3	13.4	0	25	20	0	0	12.9	5.6	2.5	0	4	0.9	4.7	5.7	0	0	1	0
																										R-HSA-9615710	0.1353
																										R-HSA-9616222
																										R-HSA-9617324			0.1478	0	0	0	0	4.3	32	0	0	0	0	0	42.3	3.7	0	0	0	0	0	0	3.2
																										R-HSA-9617629	0.1478	0.1224		0	0	31.8	0	32.7	19.2	0	0	9	0.8	0	0	0	0	0.8	0	5.6	0	0	0
																										R-HSA-9617828	0.1224		0.1394	0.9	1.5	12.8	3.7	23.6	12.7	1.8	0.8	12.4	4.6	0.4	3.9	6	0	3.5	5.6	0	0	5.7	0
																										R-HSA-9619229	0.1394
																										R-HSA-9619483
																										R-HSA-9620244
																										R-HSA-9627069		0.1556		1.5	0.9	25.9	6	12.4	0.9	3.8	0	2.9	2.5	10.8	10.3	2.2	1.1	0	0	0	0	9.5	0
																										R-HSA-9634600	0.1556	0.2304		0	0	42.8	0	16.7	0	1.1	0	0	8	0.5	16.2	0	0	6.3	0	0	1	0	0
																										R-HSA-9634638	0.2304	0.1811		0	0	15.2	5.9	17.2	12.2	2	0	12.2	10.7	5.2	3.1	0.2	0	0	3.1	0	0	6.9	0.7
																										R-HSA-975110	0.1811
																										R-HSA-975138			0.2981	0	4	42.1	3.2	0	0	0	0	0	7.8	0	22	13.5	0	0	0	0	0	0.5	0.4
																										R-HSA-975144	0.2981
																										R-HSA-975155			0.301	0	4	42.3	3.2	0	0	0	0	0	8.3	0	21.7	13.7	0	0	0	0	0	0.2	0.2
																										R-HSA-975163	0.301		0.1538	0	0	37.7	2.2	0	0	0	0	7	9.9	0	12.1	14.6	16.5	0	0	0	0	0	0
																										R-HSA-975576	0.1538		0.2326	0	0	0	0	21.7	14.8	0	0	19.2	6.8	0	0	8.6	6.1	8.6	1.6	0	0	4.1	0
																										R-HSA-975577	0.2326		0.3075	0	0	5.7	0	19.8	14.6	1	0	17.1	10.4	6.7	0	7.7	4.9	5.9	0	2.4	0	0	0
																										R-HSA-975634	0.3075
																										R-HSA-975871		0.2676		0	4.1	40.9	3.4	0	0	0	0	0	6.2	0	23.4	9.9	0	0	0	0	0	3.7	0.1
																										R-HSA-975956	0.2676	0.2234		0	0	41.5	0	13	0.1	6.6	0	0	0	11	11.7	0	0	1.5	0	0	1.8	0	0
																										R-HSA-975957	0.2234	0.2261		0	0	41.8	0	12.2	0.2	6.7	0	0	0	10.8	12.8	0	0	1.5	0	0	1.5	0	0
																										R-HSA-977068	0.2261		0.3547	2.1	0	0	3.7	27.2	0.5	8.2	0	0.4	0	13.7	5.4	4.7	4.5	11.1	0	0	0	4.7	1.8
																										R-HSA-977225	0.3547		0.109	3.4	0	3.5	0	18.3	10.3	0	0	7.9	11.1	0	0	32.2	0	0	0	0	0.4	12.8	0
																										R-HSA-977443	0.109	0.3145		1	3.4	36.6	2.6	16.3	0	3.7	0	7.1	1.6	3.9	16.3	3.6	1.1	0	0	0	0.7	2	0
																										R-HSA-977444	0.3145	0.3139		2	3.3	36.7	2.5	16.6	0	4.1	0	6.7	1.1	2.8	15.5	4.4	1.2	0	0	0	0.9	2.4	0
																										R-HSA-977606	0.3139
																										R-HSA-982772			0.1797	0	0	52.7	0	11.4	0	1	0	3.7	3.6	9	6.8	11.8	0	0	0	0	0	0	0
																										R-HSA-983168	0.1797	0.1241		0	0	0	0	19.7	17.3	8.6	0	0	0	15.9	0	24.7	0	0	0	0	0	13.9	0
																										R-HSA-983169	0.1241	0.1043		0	0	0	0	0	52.9	0	0	26.1	0	15.4	0	0	0	0	5.6	0	0	0	0
																										R-HSA-983170	0.1043	0.1166		0	7	37.5	0	23	0.6	0	0	0	8	1.9	0	8.6	0	3.4	7.2	0.4	0	2.4	0
																										R-HSA-983189	0.1166	0.1441		8.7	2.6	29	0	28.7	6.4	0.8	1.3	1.4	0	7.8	0	5.7	0	4.2	0	0	0.5	2.9	0
																										R-HSA-983231	0.1441	0.1435		0	0	33	1.2	32.8	0	9.1	1.5	0	0	3.9	6	0	0	0	0	0	1.3	1.8	2.1
																										R-HSA-983695	0.1435	0.2743		0	5.1	18.4	1.7	5.2	0	0	8	0	0	52.2	2.4	7.1	0	0	0	0	0	0	0
																										R-HSA-983705	0.2743	0.2627		0	2.3	41.3	0	0	0	0	1.5	0	0	51	0	0	0	0	0	0	0	0	0
																										R-HSA-983712	0.2627	0.1999		0	0	29.9	0.9	0	2.1	0	4.6	0	0	21.9	6.4	2	0	0	1	3	0	0	0
																										R-HSA-991365	0.1999	0.3139		2	3.3	36.7	2.5	16.6	0	4.1	0	6.7	1.1	2.8	15.5	4.4	1.2	0	0	0	0.9	2.4	0
																										R-HSA-997272	0.3139	0.3825		6.2	5.6	33.3	1.6	16.6	0.2	2	0.1	3.9	3.5	0.1	9.3	7.8	3.6	1	0	0	1.3	3.9	0
																											0.3825
[truncated: 28 more columns]

## Sheet: Results RNA
Threshold	0.1	<------	Level of significance for the AdjR2					DE: Differentially expressed vs controls																		Gene ID	Discovery adjR2	Discovery adjR2 DE-	Discovery adjR2 DE+	Basophils	CD15highCD16neg_Eosinophils	CD15lowCD16high_Neutrophils	CD15posCD14low_LDGs	CD14highCD16neg_classicalMonocytes	CD14posCD16pos_intermediateMonocytes	CD14lowCD16pos_nonclassicalMonocytes	CD56high_CD16low_NK	CD56low_CD16high_NK	CD3posCD56pos_NklikeTcells	CD19pos_Bcells	CD4pos_Tcells	CD8pos_Tcells	CD8pos_CD4pos_Tcells	CD8neg_CD4neg_Tcells	mDC1	mDC2	CD1cneg_CD141neg_mDC	pDC	HCQ
								p: probability that differentially expressed RNA/genes are linked with models influenced by immunophenotyping																		ENSG00000000003					0.2	32.9									21.6								11
																					Discovery Exp	AdjR2 < T	AdjR2 >= T			ENSG00000000419
Discovery Obs	AdjR2 < T	AdjR2 >= T	Sum		Adj R2 by DE status				Validation Obs	AdjR2 < T	AdjR2 >= T	Sum		Adj R2 by DE status							DE-	7179.01	7945.99			ENSG00000000457	0.1163	0.1163						37.9				11.6				41.1						9.4
DE-	7208	7917	15125		0,202 (0,146 - 0,261)				DE-	5257	9258	14515		0,222 (0,165 - 0,291)							DE+	46.9899	52.0101			ENSG00000000460						40.9		0.3		5		4.3				40.4						9.2
DE+	18	81	99		0,217 (0,153 - 0,298)				DE+	68	641	709		0,304 (0,219 - 0,396)												ENSG00000000938	0.1722	0.1722				7.2	4.8	21.5	15.5			6.5	3.9		17	12.2		3.9				7.5
Sum	7226	7998	15224						Sum	5325	9899	15224														ENSG00000000971	0.1923	0.1923		4.8		9.4	0.6	5.9	11.8			6.5	28.7	7.4			10.1					7.8
																										ENSG00000001036	0.389	0.389			0.7	36.3		36.2	7.5		2.3	7.4					1.2	2.8					3.8
p	4.80591e-09								p	0																ENSG00000001084	0.1564	0.1564				29.9	0.3	3.3				7.2	8	7.9	1.1	25		5.6	1.3		7.2	3.2
OR	4.09701								OR	5.35266																ENSG00000001167							0.2	42				11.5	2.5			30.5					3.2
OR CI95	2.45598	6.83452							OR CI95	4.15927	6.88848															ENSG00000001460	0.1129	0.1129				48.9									14	34.3		2.7
Accuracy*	0.503818								Accuracy*	0.525992			*Balanced accuracy, mathematical mean of sensitivity and specificity													ENSG00000001461	0.2765	0.2765				47.1			0						24.3	24.4
Adj R2	0,202 (0,146 - 0,262)								Adj R2	0,224 (0,167 - 0,296)																ENSG00000001497	0.2755	0.2755				48		16					1.4		21.5	8.8				4.4
																										ENSG00000001561	0.3782	0.3782				11.8	2.4	14.7	0.6			17.1	10.7	7.9	4.3	17		1.3			2	5.4	2.5
Cell subtype/therapy				Relative contribution in significant models, mean (SD)																	Validation exp	AdjR2 < T	AdjR2 >= T			ENSG00000001629	0.1366	0.1366				24.1	3.2	13.5				11	6.7			26		1.4			5.8	8.4
				Discovery		Validation															DE-	5077.01	9437.99			ENSG00000001630	0.1543	0.1543		1.1		57.2	2.1		0.3	0.5		12.6				20.6						5.6
Basophils				5,77%, (7,03%)		5,62%, (6,83%)															DE+	247.992	461.008			ENSG00000001631	0.1114	0.1114				36.6	4.3					9.9	7.9			26.5		2.8			3.6	8.4
CD15highCD16neg_Eosinophils				5,12%, (7,97%)		8,99%, (11,81%)																				ENSG00000002016	0.1341	0.1341				33.5				4.2						31.6		6.1			4.1
CD15lowCD16high_Neutrophils				36%, (15,31%)		29,28%, (17,63%)																				ENSG00000002330
CD15posCD14low_LDGs				5,8%, (9,05%)		5,44%, (7,7%)																				ENSG00000002549	0.1083	0.1083				15			34.1		2.4	19.2	3.4					12.8	2.3
CD14highCD16neg_classicalMonocytes				17,78%, (12,26%)		13,43%, (12,39%)																				ENSG00000002586	0.1897	0.1897			4	45.1	2.1	24.8				4.5	18.5				1.1
CD14posCD16pos_intermediateMonocytes				8,68%, (10,25%)		11,95%, (11,96%)																				ENSG00000002587	0.2436	0.2436		8		30.4			2.2					51.5
CD14lowCD16pos_nonclassicalMonocytes				6,74%, (10,85%)		6,42%, (8,77%)																				ENSG00000002726
CD56high_CD16low_NK				6,13%, (8,48%)		8,47%, (11,3%)																				ENSG00000002745	0.16		0.16			19.1		10.6						29.1			7.1	13.5	3
CD56low_CD16high_NK				9,36%, (9,81%)		10,94%, (8,3%)																				ENSG00000002822	0.1263	0.1263				64.2								34.2		1.6
CD3posCD56pos_NklikeTcells				8,24%, (8,73%)		7,91%, (9,49%)																				ENSG00000002834	0.167	0.167				51.7		9.3		0.8			0.5	8.4	20.3							9.1
CD19pos_Bcells				11,67%, (13,6%)		11,47%, (11,55%)																				ENSG00000002919	0.1477	0.1477				34.2	2		5.5			16.7	9.3		2.3	4.7	0.6	1.2		6.3		7.8	6.9
CD4pos_Tcells				13,97%, (12,02%)		11,53%, (10,34%)																				ENSG00000002933					1.2	18.8			49.1									27.8	3.1
CD8pos_Tcells				20,64%, (17,03%)		10,12%, (11,95%)																				ENSG00000003056	0.3353	0.3353				52.9		11.6	7.4							28.1
CD8pos_CD4pos_Tcells				7,01%, (10,68%)		7,82%, (8,21%)																				ENSG00000003096						100
CD8neg_CD4neg_Tcells				6,6%, (9,88%)		9,2%, (13,05%)																				ENSG00000003147					12.5		29.7						27.7			19.4	10.7
mDC1				5,83%, (8,45%)		5,99%, (6,79%)																				ENSG00000003249	0.3315	0.3315		5	1	28.8	6.1		2.2					29.9	0.8			7.4				2.4
mDC2				6,91%, (11,64%)		5,18%, (7,32%)																				ENSG00000003393	0.1101	0.1101		0.1		28.6				0.1	10.2	13.6	13			16.7						5.5	2.4
CD1cneg_CD141neg_mDC				5,35%, (8,2%)		4,87%, (4,65%)																				ENSG00000003400	0.1178	0.1178				36.5		3.6	27.1	4.4	5.1	19.6									3.8
pDC				7,9%, (10,76%)		6,29%, (6,09%)																				ENSG00000003402	0.3181	0.3181			4.1	46.5		25		1.6				4.2	8.2	1.1					1	0.1
HCQ				7,41%, (10,71%)		3,9%, (8,17%)																				ENSG00000003436
IS				9,23%, (12,71%)		10,64%, (11,03%)																				ENSG00000003509						31.3	3.2			25.4						38.4		1.6
DCS				9,83%, (11,82%)		12,4%, (10,89%)																				ENSG00000003756						53.6												14.7
																										ENSG00000004059				0.1		0.3	1.7	37.9				13.2				21.6				14		11.2
																										ENSG00000004139	0.2812	0.2812				43.1									22.6	17.3	9.8	1.3
																										ENSG00000004142	0.1135	0.1135				50.9		5.8	7.2					5.1	20.3					10.7
																										ENSG00000004399	0.1458	0.1458				57.9		42.1
																										ENSG00000004455	0.3845	0.3845				51		29.3	3.1						2.1	10.4							1.7
																										ENSG00000004468						23.3			8.7	18.8	0.2	26.9					11.1					3.2	7.7
																										ENSG00000004478	0.2111	0.2111				42.1								13.9	9.5	20		0.6				2.2
																										ENSG00000004487	0.3517	0.3517				49.7		15.1	0.7				4.9	2.2	10.4	16.5		0.5
																										ENSG00000004534										23				21.2		6.4	49.4
																										ENSG00000004660	0.1063	0.1063			1.6	44.7	1.3					5.9				20		8.1				10.9
																										ENSG00000004700	0.179	0.179				41.7				5.1		3.9	5			33.8						10.4
																										ENSG00000004766	0.1743	0.1743				44.7							6.8			39.5						8.9
																										ENSG00000004777						42								12	5.5		11.9	21.6				7
																										ENSG00000004779	0.2303	0.2303				43.9	3.7	17.1	11.5						0.8	7.1
																										ENSG00000004799
																										ENSG00000004809
																										ENSG00000004838				18.1		9.5	4.3			2.2	1.2	19.1	22.1				11.5				11.9
																										ENSG00000004864						55.3		42.8	1.9
																										ENSG00000004866	0.1536	0.1536				37.3	1.2			20.3		13.7	21.3			1.7		4.5
																										ENSG00000004897						15.7	1.2	23		2.3		3.5	4.7			27.4						17.1	5.1
																										ENSG00000004939								100
																										ENSG00000004961	0.175	0.175				49.8		25.2	11.6							13.4
																										ENSG00000004975	0.3312	0.3312		8.5	1.3	23.5	1.4	9.1	3.8	0.3	1.4	2.7	5.1	4.3	11.9	1.7	3	0.7	2.9	6.6	5.8	0.7	2.2
																										ENSG00000005007						24.7			65.7												9.6
																										ENSG00000005020	0.176	0.176		8.3	0.6	30.6	4.5	4		1.4	5.6	5.4	1.7		28	2.8				5.7		1.3
																										ENSG00000005022	0.3514	0.3514				50	0.4	28.9	2.2	1.4				0.7	3.2	8.7
																										ENSG00000005059	0.2173	0.2173				49.9	8.4	6.5							12.7	18.8	0.4					3.3
																										ENSG00000005075							1.4	35.1		14.7		20.5		1.6		15.8				10.9
																										ENSG00000005100	0.1499	0.1499				49.2										31.6		12.4				6.9
																										ENSG00000005102
																										ENSG00000005156	0.291	0.291				47.2						0.6	2	1	21.9	15.2		4.3
																										ENSG00000005175						28.8				14.7			19.2			21.8					6.1	9.4
																										ENSG00000005187						57.7									3.8	38.5
																										ENSG00000005189					7	43.6	0.6		37.3			7.3					4.3
																										ENSG00000005194	0.2609	0.2609				50.9		10.4		0.4					14	14.8				3.1
																										ENSG00000005206	0.1435	0.1435		6.6		42.6		5.6			8.3			31.7			0.6	3				1.6
																										ENSG00000005238	0.2381	0.2381			4	33.1	3.2			3.2		4.1	6		10.5	14.3		1.8				7.1	7
																										ENSG00000005243	0.217	0.217		5.4	6.6	33.2	4.5	13.1	14.5	2.3		13.1	2.6				3.9		0.5			0.1
																										ENSG00000005249																67.8
																										ENSG00000005302	0.1499	0.1499		2.2	7.5	35.2	2.8	21.2		3.4	7		5.9							1.1	1.3		2
																										ENSG00000005339						41.4		34.3	23.6			0.7
																										ENSG00000005379	0.3703	0.3703			2.8	21.3			5.3			34.6	10.4	7.6			2.1	5.2			0.4
																										ENSG00000005381				4	2.1		10	21.9	2.8	0.6		1.7	9.7	8.9			10.7			6.9		4.2	12.6
																										ENSG00000005436	0.2212	0.2212				47.6	1						8.9		1.4	33.6						7.5
																										ENSG00000005448	0.2306	0.2306		1.9		41.6							6.4	6.9	19.8	17.4		4		2
																										ENSG00000005469	0.1664	0.1664				47.3				3.7		0.5	6.6			30					0.1	11.9
																										ENSG00000005471	0.4272	0.4272		4.2	0.6	6.6	0.7	11.2		1.1	0.1	0.2	0.9	41.2	17.5		3.6	1.1	0.2		2.5
																										ENSG00000005483							3	33.4	3.3			15.8	9.9			19.1		2			7.3	6
																										ENSG00000005486								14.7		38.6	13.6			13.6						19.5
																										ENSG00000005513						37.6									33.8
																										ENSG00000005700	0.1683	0.1683				45.7	2.8					4.4	3.7			26.1						17.2
																										ENSG00000005801	0.2099	0.2099				42.7			0.5	3.2		4				45.3					4.2
																										ENSG00000005810				8.7		29.7	0.2	12.7	4.4			7.2				26.6		4.8		5.8
																										ENSG00000005812
																										ENSG00000005844	0.1965	0.1965		8.8	0.4	25.2	1.8			5.4		7.6	6.4	7.1	8.9	16.7	5.6	0.2				5.9
																										ENSG00000005882	0.2765	0.2765		0.4	5.2	36.5		5.8		1.2	0.4		2.7	3.7	15.1	5.9	5.1			8.1
																										ENSG00000005884	0.127	0.127				48.8	1.2						4.4		42.5	3.1
																										ENSG00000005889							6.9	26.1	6.2		2	9.1	9.6			17.8			6.1			10.4
																										ENSG00000005893	0.2993	0.2993		0.8	0.9	40	5.1	15.7			0.1	2.9	2.5	4.1	18.2		0.8	2.5				6.4
																										ENSG00000005955																100
																										ENSG00000005961																71.9
																										ENSG00000006007	0.2281	0.2281			2.2	40.8		19	3.5	1.4			4.2	0.6	22.5	0.9	1.2		3.7
																										ENSG00000006015
																										ENSG00000006025	0.2832	0.2832				44.1		2.1					8.3	2.1	7.6	16.5	8.6	7.6					0.3
																										ENSG00000006062	0.2816	0.2816				41.9		1.6		6.6				37.6	1.7		6.5	0.4		3.7
																										ENSG00000006075	0.1087	0.1087			17.2	26.2						56.6
																										ENSG00000006114	0.2238	0.2238		0.8		18		21.9	3.7			6.6	11.1			28.7		6.2			1.5	1.5
																										ENSG00000006125	0.2474	0.2474				39.1		9.2					7.5			44.2
																										ENSG00000006194	0.2384	0.2384				40.8								4	27	17.8	2			4
																										ENSG00000006282						100
																										ENSG00000006327				2.3	3.3	23.9	0.2			0.6	11.7	16.4	11.7	1.4	4.1	2.2	6.6	5.4		6.3		4
																										ENSG00000006432	0.22	0.22			5.4	35.3							2.2	25.4		18.9	3.5	4.6
																										ENSG00000006451	0.2045	0.2045				48.4								11	3.6	27.3						6.5
																										ENSG00000006453						40.5	1.9	17.1		5.7					23.8			1.2		9.7	0.1
																										ENSG00000006459						37.1	6.8	14.2						14.4	8.6					18		0.9
																										ENSG00000006530	0.2726	0.2726				42.9						12.6	5			28.8					2	1.3
																										ENSG00000006534	0.2539	0.2539				14.4		31.1	4.8			10.6	10.6			7.2		7.1				7.8
																										ENSG00000006555	0.2393	0.2393				7.9	2.6	24.9				15.8	31.8			1.3	11.2
																										ENSG00000006576	0.1573	0.1573				26.2	13.8	2.4		14.5		13.4	3.3			10.9						15.7
																										ENSG00000006607	0.1334	0.1334				56								22.3		18.1		3.6
																										ENSG00000006625	0.2002	0.2002				46.3		16	5.5		0.8			4.6		10.1		3.2				3.8	2.9
																										ENSG00000006634	0.1968	0.1968				42.5	8.9						1.9			36						10.7
																										ENSG00000006638						68.6								18.2		13.2
																										ENSG00000006652	0.2865	0.2865			0.7	50.7	4.3	18.4					8.4	3	14.5
																										ENSG00000006695	0.3131	0.3131				51.7							5.6		20.9	17.9		0.5					3.4
																										ENSG00000006712	0.1133	0.1133				6.6	11.1			21.4	5.1	3.6		31.3			1		4.1	11.8		4.1
																										ENSG00000006715																61.8					38.2
																										ENSG00000006744	0.3749	0.3749		6		47.6		12.8					5.8	5.6	15.4	6.9
																										ENSG00000006756	0.2172	0.2172			5.6	30.4		39.5	0.2				5		1.2	1.1	4.5	1.6		3.3	0.4		3.5
																										ENSG00000006757						44.6								29.4	6.8	14.5				4.7
																										ENSG00000006831	0.1985	0.1985				38		1.6		3.3		19.6	16.1	0.6	3.2	14.9		0.3			0.1	2.3
																										ENSG00000006837					3.3	19.9	6.8		13				10		7.7		18.6				10.6	10.2
																										ENSG00000007038					1	27.2	7.7		0.6		5.4		9.1		22.6		7.4					19
																										ENSG00000007047
																										ENSG00000007080	0.1189	0.1189			6.4	32.3	3.3	20.9		5	4.7	1.6	3.6	6	0.7				2.2			2.8	3.2
																										ENSG00000007129									9.5							2.1
																										ENSG00000007168
																										ENSG00000007202	0.1719	0.1719		5.4		48.3		10.6							6.5	25.5		3.6
																										ENSG00000007237				6.5				26.9						13.9	9.6		16.6	1.6		0.7			2.3
																										ENSG00000007255	0.2032	0.2032		3.3	1.6	37.6		18.9	3.6	3.4	1.1		0.3	8.4	10					2.1	0.9		0.5
																										ENSG00000007264	0.3728	0.3728			4	21.6	4.2	3.7	4.1		5.8	19.8	17.7	3.5	5.3	5.7	2.6	0.8			1.1	0.2
																										ENSG00000007312	0.52	0.52		7.2	2.6	18.5			0.3	0.5	1.6	2.9		42.4	8.4	2.7	2.8				2.3		0.5
																										ENSG00000007341						51.9			2.7						37.4	8.1
																										ENSG00000007350	0.2287	0.2287		12.7		8.8	6.8	12.6	1.9		1.2	31.5				4.6		3.4	2.5			5.2
																										ENSG00000007376						47.8	0.1	31.9		0.9				9.9								9.4
																										ENSG00000007392						35.3								25.9		18.3	11	9.4
																										ENSG00000007402	0.406	0.406			2.8	13.5		12.3	3.8			15.2	22.4	1	7.7	9.2	1.7	6.8			3.6
																										ENSG00000007516							23.2		25				27.4	14.6				9.7
																										ENSG00000007520
																										ENSG00000007541	0.1182	0.1182		7.5	5.8	28.7		13.7		0.2	5.1	4.2	5.3	12.4	8.6	2.1	1.6	0.9				4
																										ENSG00000007545						33.8			5.1		5	31.6				3.9	6.3	9.9	4.6
																										ENSG00000007923	0.4039	0.4039				53.1		22.4					0.3	2.7	6.2	13.5		1.2				0.6
																										ENSG00000007944				3.3	3.7	21	2.9	16.9			0.5	15.4		3.7	5.5					6.7	3.5
																										ENSG00000007968					0.2	24	17.6		20			15.3	11.2				11.8
																										ENSG00000008018	0.1224	0.1224				47		36.7	8.8			6.8									0.7
																										ENSG00000008083						70.5			29.5
																										ENSG00000008086
																										ENSG00000008128											16.6
																										ENSG00000008130	0.2403	0.2403			3.1	37.5	1.1	1.2	5.3	0.6		10.5	11.1		11.9	5.5		5	2.5			4.6
																										ENSG00000008226					2.2	24.2			4			20.5	18.2				16.5	14.3
																										ENSG00000008256	0.2719	0.2719		3.8	0.4	19.1	1.8	4.1	5.6		4.5	9.6	19.5	3.5	1.6	0.9	0.8	8.1	8.1				0.1
																										ENSG00000008277	0.2381	0.2381				29.7		7.3					13.6			39.7		0.6				1.3
																										ENSG00000008282	0.1498	0.1498				36.9	8.1							29.9		9.9						5.3
																										ENSG00000008283	0.13	0.13				42.6			10.3				21.7			25.4
																										ENSG00000008294	0.1014	0.1014				48.6		27	0.6				1.8	12.9					3			6.1
																										ENSG00000008300	0.1513	0.1513			1.4	29.4	6.1			3.4	7.5	2.7	3.4		11	12		1.8	15.8			0.4	4.2
																										ENSG00000008311
																										ENSG00000008324					3.8	56.5		8.3		0.9			15.2		6.5	5.7						3.1
																										ENSG00000008382	0.104	0.104			0.3	49		36.5						4.2						7.7	2.3
																										ENSG00000008394	0.3478	0.3478				19.5		40			6.1	7	8.1				3.5	7					2.2
																										ENSG00000008405	0.198	0.198				40.3			3.2			11.5	9			36.1
																										ENSG00000008438	0.1775	0.1775		3		46.5	1.4					9.5	20		7.9	7.3						4.4
																										ENSG00000008441								100
																										ENSG00000008513	0.2289	0.2289				10.6	0.8	33.2		2.5	3.9	2.9			4.1	28		9.1
																										ENSG00000008516	0.2441	0.2441		6.8		45.4	1	9.6		1.8		2.6			1.7	23.5	0.5					0.2
																										ENSG00000008517	0.1476	0.1476				45.7							10.5			22.4	19.4	2
																										ENSG00000008710	0.2505	0.2505			6.9	33.7		10.3	5.8		1.9		8.8	1.8	17.5		0.4	5			0.7	3.6
																										ENSG00000008838	0.3953	0.3953			3.8	45.2	1.4	17.8			0.5			5.2	7.6	12		1.4		4.8		0.3
																										ENSG00000008853	0.3057	0.3057			1.7	43.7					1			36		7.6		0.8
																										ENSG00000008869	0.1078	0.1078				33.3	2.7	2.6	5.1			8.6	7.8			24.2		5.1			6.1	4.6
																										ENSG00000008952
																										ENSG00000008988	0.1726	0.1726				36.8		2.4		6.9				15.8	12.1			0.2
																										ENSG00000009307	0.1058	0.1058		9.5		44										40.1						6.3
																										ENSG00000009335	0.1723	0.1723		3.1		46.5						3.9				42		1.8				2.7
																										ENSG00000009413				3.2		5.2	6.8	24.6	7.6			11.8	3.4			18.6		1		2.5		15.1
																										ENSG00000009694					0.2	15.1	13.7	22.8	1.8			11.6		13.2		11.9	3.7		0.3
																										ENSG00000009780	0.1218	0.1218				41							7.5			33						6.4
																										ENSG00000009790	0.2441	0.2441				47.6									16.2	36.2
																										ENSG00000009830					0.9	33.7		11.3		5.5	10.7				8.7	0.4	7.6			0.8		1.6
																										ENSG00000009844						30.5	12.8		7.8		10					24.2						14.7
																										ENSG00000009954	0.2187	0.2187		3.7		48.3						4.6	7.9		3.2	31.3		1
																										ENSG00000010017						1.2		38.6				12.1				32.9						15.2
																										ENSG00000010030						2.7			39.1			13		8.3			5.7	19.9	11.3
																										ENSG00000010072						2.9	6.2	26.4		1.6		8.7				25.2					4.1	9.6	10.5
																										ENSG00000010165	0.3257	0.3257				49.9		12.7	3.8						12.4	20				1.2
																										ENSG00000010219	0.2872	0.2872		8.8		37.2	2.4	3.9	9.2		0.5			24.7		13.3
																										ENSG00000010244						28	10.5			14.7						37.8					5.7	3.4
																										ENSG00000010256	0.2251	0.2251			1.1	36.6		37.4	3.4			9.4	4					0.3		7.7
																										ENSG00000010270
																										ENSG00000010278																77.2
																										ENSG00000010292	0.2409	0.2409		0.7		52.7						8.6				38.1
																										ENSG00000010295	0.1058	0.1058		0.7		35.4		50.7					1.1									12.1
																										ENSG00000010310	0.107	0.107			6.4	38.1				2.1		3.6		17.5			10.9	12.7
																										ENSG00000010318						54.5	6.5				3.6		12.5	8.7		2.3	0	11.8
																										ENSG00000010319
																										ENSG00000010322	0.2344	0.2344		12.6	2.9	27.2	1.3	15.7	3.1	1.1		0.4	2.6	7.1	15.5		3.3	1.2			4.6	1.4
																										ENSG00000010327	0.3703	0.3703		0.6	3.6	18.3	3	34	3.8	2.4	5.5	7.1	7.1		2.4	6.6	1.2	1.2			1.1	2.1
																										ENSG00000010361
																										ENSG00000010404	0.2374	0.2374			1	24.6	4.1	18.8	7	0.8		12.6	8	5.8	9.5			1.2		0.6		6
																										ENSG00000010539	0.1826	0.1826		0.6	7.8	43.2		31.2		5.1			2.9								2.9
																										ENSG00000010610	0.4615	0.4615			4.3	36.8	1.9	25.5	2			7.3			12.1			0.3	1.4	2.2
																										ENSG00000010626	0.1052	0.1052		5.1		34.6	7.2	22.9	4.3	3			3.4	19.3								0.1
																										ENSG00000010671	0.3156	0.3156			0.8	9.1		9.6	14.5	2.8	5.1	3.5	10	22.4	12.3	1.9	2	2.3			0.3
																										ENSG00000010704	0.1453	0.1453		1		42.6	11.1	26.4	7			0.1	0.8			8.3		2				0.6
																										ENSG00000010803	0.3455	0.3455			0.7	45.4							9.5	5.8	12.7	13.6	4.8	7.5
																										ENSG00000010810	0.3826	0.3826				44.9	0.3					12.2	7.4			32.7					2.5
																										ENSG00000010818						8.1		26.1	10.6			0.9	4.4		19.7	19.3		4.7			3.1	3.1
																										ENSG00000011007	0.2098	0.2098		0.3		47.5	2.6		2.2					7.6		29.7							6
																										ENSG00000011009						39.8		20.4												39.8
																										ENSG00000011021	0.2424	0.2424		5.1	2.9	34.8	3.4	22.3	0.5	1.4		1.6		16.7		2.9		4			3.8	0.6
																										ENSG00000011028				3		30.4		11.7			10.9	13.1		21.2							5.9	3.7
																										ENSG00000011052
																										ENSG00000011105																77.7		9.1
																										ENSG00000011114				8.6		6.4	7.1	11.3	8.2	0.3	4.2	14.8	1.7	0.4	12.2	16.5		1.5		2.5		4.3
																										ENSG00000011132				7.2		30.9		12.2	3.8	2.6	9	0.8	12	4	10.1			0.4				7.1
																										ENSG00000011143	0.2469	0.2469			1.7	49.9	1.1								31.1	11.2				5.1
																										ENSG00000011198	0.3111	0.3111				52.7		20.6					2.1	4.4	16.6
																										ENSG00000011243	0.1273	0.1273		12.1	1.4	16	0.7	10.9	3.1		9.6	0.9		15.4	0.1	2.1	7.8				3.6	7.2	6.4
																										ENSG00000011258																19.9						80.1
																										ENSG00000011260	0.276	0.276				48.2		6.9	5.3				0	6.9	3	19.8					2		3.1
																										ENSG00000011275	0.173	0.173			2.1	32.6	1		10.1					2.3	23.7	15	5.9	4.5				2.9
																										ENSG00000011295	0.2434	0.2434				48.8		15					4.7			25.5						3	2.5
																										ENSG00000011304	0.3002	0.3002			3.5	45.2		13.9	2.7			2.9	9.5	5.6	6.1	7.3		1.4	1.4			0.6
																										ENSG00000011376	0.2652	0.2652				52.3	0.4	5							5	33.9		3.4
																										ENSG00000011405					0.2	12.2	3.6	23.2				13.2	7.5			19.8					4.9	15.3
																										ENSG00000011422	0.2251	0.2251				33.6		3.2	7.8			3.9	15		19	6.1		4.6	0	2.2		4.6
																										ENSG00000011426				0.5	7.2		7.7	3.5	9.2	5.1			8.6	17		12.3	12.5	8			0.9	7.5
																										ENSG00000011451	0.1499	0.1499			4.8	39.9	1.8	13.1	0.7	2.1	6.1		4.4	6.8	9.7	3.2						7.4
																										ENSG00000011454						48.5						10.3			7.9	27.9						5.4
																										ENSG00000011478	0.2142	0.2142			6.7	23.9		13.2		3.1	8.1	2.5	0.8	3.6	12	6.5		5.9		2.3
																										ENSG00000011485	0.2802	0.2802			1.9	47.2					5.1		11.1			28.8		2.9				3
																										ENSG00000011523	0.1946	0.1946			1.1	39.8		4.5	2.4				4.9		27.8	19.5
																										ENSG00000011566	0.1022	0.1022				44.5						4.3				36.1			15.1
																										ENSG00000011590	0.1074	0.1074				33.4	3.7		4.1				4	7.7	3.5	19			3
																										ENSG00000011600	0.1541	0.1541				20.9	1.6	21				6.7	7.2			27.4		0.5				14.7
																										ENSG00000011638						46.4		7.7					2.3	8.2		30.8	4.6
																										ENSG00000012048	0.1426	0.1426			4.9	37.4		26.5	3.5			1.3		10.4	10.5						3.7	1.8
																										ENSG00000012061	0.3436	0.3436		5.8	1.5	41		26.5	4.2		1.9	3.6	2.9	2.8	6.4		2.1	0.6		0.2		0.3
																										ENSG00000012124	0.5529	0.5529		6.2	2.4	12	2	3.2			2.7	1.4	0.3	41.8	12.8	0.5	2.8	0.1			4.5
																										ENSG00000012171					11.6	23.7				7.1	15.1		16.2			18.6		6.3				1.4
																										ENSG00000012174	0.1251	0.1251			3.9	37.9	3.6			2.1		5.9				23.3					2.7	6.7	13.9
																										ENSG00000012211	0.1408	0.1408				24.2	3.5	9.8	4.8			9.1	12.5	10.5	9			5.2	10.1			1.5
																										ENSG00000012223				20.3			41	0.6					1.6								10.9		13.1
																										ENSG00000012232	0.2202	0.2202			0.7	53.4		20.5	7.1			2.2			16.1
																										ENSG00000012660	0.1441	0.1441				48.4	2.4	24.1		3.3					10.8						3.2	7.7
																										ENSG00000012779	0.3421	0.3421			4.5	36.6	0.3	11	2.4		0.8	3.5	13.1	2.1	10.5	8.2	4				0.8	2.4
																										ENSG00000012822				6.8		39.9		12.9	1.9						10.6		0.2
																										ENSG00000012963	0.2243	0.2243				46.5						6.5	15.4			29.5						2
																										ENSG00000012983	0.1438	0.1438		2		15.4	5.4	4.7	5.6	4.9		10.4	5.2	8.4	0.1	16.1	5.4	1.8			0.6	7.4	3.9
																										ENSG00000013016
																										ENSG00000013275	0.1873	0.1873				50.4		14.5	5.2					3.4	3.5	15.9				7.1
																										ENSG00000013288					6.8	8.6	3.7	1.8	13.4	3.4	8.1	7.8	3.8	6.2	2.6	1.1	1.5	5.6		14.1	11.4
																										ENSG00000013306
																										ENSG00000013364	0.1124	0.1124				35.8			3.1			22.3	9.9			8.4			11.9			8.6
																										ENSG00000013374									22.3	77.7
																										ENSG00000013375	0.1558	0.1558				37.6						10.3			2.2	40.1			3.4
																										ENSG00000013392	0.1284	0.1284				32.3									8.8	43.1
																										ENSG00000013441
																										ENSG00000013503	0.2613	0.2613		0.9		52.4							7.4		17.6	21.7
																										ENSG00000013523	0.3541	0.3541				45.4							2	0.9	15.8	25.2					1.4
																										ENSG00000013561	0.1734	0.1734				30.8	3.7		0.2	4.5			1	7.5		30.6	6.7	1.5			4.6	9
																										ENSG00000013563	0.2101	0.2101			2	30.4		36.4	6.2			4.4	11.6									5.4
																										ENSG00000013573						23.1				10		4.4		10.4			15.2	16.6	9.8		0.8	9.7
																										ENSG00000013583	0.1481	0.1481				24.5		28	9.6			6	8.7				12.4	5.9				5
																										ENSG00000013619						6.9		17.7	20.4				50.9
																										ENSG00000013725	0.357	0.357		1.2	1.9	35.3	1		3.9				6.7		26.6	9.8	8.8			0.1		4.9
																										ENSG00000013810	0.178	0.178				40.4	2			10.4		11.3	9.6			18.3				6.2		1.8
																										ENSG00000014123	0.1044	0.1044				38.1	0.5					9				33.8					1.1	13	4.6
																										ENSG00000014138	0.2463	0.2463			1.7	45.7			4.2	0.7			3.9	10.4	7	22.2		1.8		1.7		0.7
																										ENSG00000014164																24.1				27.4		48.5
																										ENSG00000014216
																										ENSG00000014257
																										ENSG00000014641	0.3607	0.3607				51	1.5	13.1	8.1						1.2	23.7						1.3
																										ENSG00000014824						40										42.4						17.7
																										ENSG00000014914	0.4787	0.4787			1.9	25.9	1.2	29.9	12.9	3	1.7	11.9	7.8			2.1		1.1				0.5
																										ENSG00000014919						61.6										38.4
																										ENSG00000015133	0.3306	0.3306			1.5	44.6			1.3			13	11.3		0.8	25.6		1.9
																										ENSG00000015153								30.1		4.8		1.3	5.2	10.4		29.7						18.4
																										ENSG00000015171	0.2555	0.2555				30.6	0.8	7.9	2.8			11.6	9.5			26.3		2.5			0.4	7.6
																										ENSG00000015285	0.2092	0.2092				42.9						8.7	5.5		2.3	20.1		6.4				14.1
																										ENSG00000015475						23.9		2.1	20.5			26.3			9.6	13.8		2.8				0.9
																										ENSG00000015479	0.175	0.175				45.8							2.4			44						7.8
																										ENSG00000015532	0.2933	0.2933		5.7	2.8	35.9		12.2	4.7		4.4	2.8	6.1	3.6	15.3		2.9			3.5
																										ENSG00000015568
																										ENSG00000015676	0.3717	0.3717				46.7								7.3	16.6	24.6		0.3
																										ENSG00000016864	0.182	0.182			0.5	49.7		7.3	3.7	0.2		1	9.7		1.9	25.1						0.8
																										ENSG00000017260						33.6	4.4									41.7						20.4
																										ENSG00000017483
																										ENSG00000017621									27.5				41.3										31.2
																										ENSG00000017797	0.1272	0.1272				48.3		19	10.1			4		2	11.4	3.5				0.9	0.9
																										ENSG00000018189						46.9			17.2							35.9
																										ENSG00000018280	0.2816	0.2816				49.3						6	4.3		9.6	25.7						5.1
																										ENSG00000018510	0.108	0.108				48			11.4							26.8						13.8
																										ENSG00000018610						41.5		2.9		5.4			5.7			34.3						10.1
																										ENSG00000018699	0.295	0.295				50.5							5	2.5	11	25
																										ENSG00000018869	0.1827	0.1827			3.1	23.9		7.2		1.7		5	8.2	7.1		18			8.4
																										ENSG00000019144	0.1306	0.1306				33.8			0.1	2		6.3	0.5		21.7	8.8	14.6						7.2
																										ENSG00000019169	0.1736	0.1736			4.4	12.1	3.7	20.4	18.9	8.1		7.7				14.5			7.6			2.6
																										ENSG00000019485	0.2512	0.2512				41.6					7.3	3.8	5.4	1.8	10.1	18.4		2.6				3.6
																										ENSG00000019582	0.4077	0.4077		3.5	3.3	32.7		15.3	4.2	0.9		7.5		25.3	3					0.4		0.6
																										ENSG00000019991				7			3.2	13.8	12.6				9.9		28.8		8.5		1.1	13.2	1.8
																										ENSG00000019995	0.1488	0.1488		1.1	6.1	20.4	2.4	24.1	5.3			1.8		3.6	8.5	13.3	4.9	3.5				5.1
																										ENSG00000020129	0.2897	0.2897		1.9	5.9	30.4	0.5	19.7	4.1	0.8	2.1	5.4	1.7	3	15.7	3.1	1.5		2.2	0.7		1.4
																										ENSG00000020181	0.2653	0.2653		1.7	3.3	34.8	1.9	39.1				1.5				6.7	2.3	1.4					0.4
																										ENSG00000020256	0.2768	0.2768				44.7							5	11.9		26.4	1.2	3.2
																										ENSG00000020426	0.2496	0.2496				48.2						10.2	10.7		12.4	18.4
																										ENSG00000020577	0.2381	0.2381				35.7			38.5	19.1			6.6
																										ENSG00000020633	0.4876	0.4876			1.2	26.3	0.6	4.3	3.4	0.1	3.1	20.2	14.2	3.9	5.3	15.6	1.1				0.7
																										ENSG00000020922				5.7	1.4	34	2.4	5.5				4.5	9.5			22.3		3.3			5.4	6
																										ENSG00000021300	0.2121	0.2121				40.7				0.1					48.3					5.2
																										ENSG00000021355	0.2874	0.2874			2.8	28.7	0.7		11.2	0.3	4.2		10		13.8	7.5	2	9.4		2.3			2.9
																										ENSG00000021574
																										ENSG00000021762	0.2617	0.2617		1.5	1.4	24.1	3.2	6.4	0.6	0.7	6.3	23.2	8.9		16.1	2.1	1.4	0.8			2.9	0.4
																										ENSG00000021776	0.115	0.115		2.8		46.4	2.3									38.3					3.5	6.7
																										ENSG00000022267					1.4	3.2		21.1	14		1.6	13.8						10.3			0.6	15	6.8
																										ENSG00000022277	0.2543	0.2543		2.5		46.1	3.9	3.4				9.7	8.2		8.9	7.9		3.3		3.7		2.2
																										ENSG00000022556
																										ENSG00000022567						72.8			3.9						23.3
																										ENSG00000022840				8.1		32.6		34.6					18.7		5.9
																										ENSG00000022976				20.2			13.6								35.4		9.8			5.3			2
																										ENSG00000023041					3.6	20.8				17.8						57.6					0.2
																										ENSG00000023171						27.8			43.4	17.7		11.1
																										ENSG00000023191	0.2764	0.2764			1.9	42.5		34.4	0.4		0.8	1.7		3.2				0.4				7.1
																										ENSG00000023228	0.1056	0.1056		6.1		41.3						4.6				34.8		2.4				10.8
																										ENSG00000023287				1.9		22.1	6	23.6	3.1	1.3		8.6	1.4	6.6	6.6	7.9			3.1			8
																										ENSG00000023318	0.131	0.131						7.2	37.9			2.7			29.3		10.3	7.8				4
																										ENSG00000023330					5.9		2.2		28			24.9	1.1				16.5					10.4
																										ENSG00000023445	0.2026	0.2026				37.4	9							44.9		5.1						3.6
																										ENSG00000023516	0.1269	0.1269				35.2	2.3	3.2	1.5			6.6	5.5			30.7					2.6	12.4
																										ENSG00000023572
																										ENSG00000023608				17.9	5.5	45.4										31.2
																										ENSG00000023697				0.5		34.1		13.9	26.6	17.4							2	5.5
																										ENSG00000023734	0.2394	0.2394				51.4		4.6	1.6							34						8.4
																										ENSG00000023839
																										ENSG00000023892				21.8					6.1	10.5				13.9	20.1	6	5.9			0.7		15
																										ENSG00000023902	0.2017	0.2017		1.4		13.6	1.6	19.6	10.1	0.5	5.6	16.7	1.6	4.2	4.4	8.3		3.4		3.5		5.6
																										ENSG00000023909	0.2231	0.2231			1.1		2.4	20.3	0.7		4.8	22.6	11.9	3.8	8.4	12.8				2.6	2.1	6.6
																										ENSG00000024048	0.1615	0.1615		1.1	1.5	43.7		24.6		2.4			0.1	10.3	5.9					2.1		2
																										ENSG00000024862						51	14.8				3.4							7.5			3		3.5
																										ENSG00000025039	0.2453	0.2453				44.9	1.2		1.8			12.6	3.9	12.2	7.2	1.6	6	4.1			4.6
																										ENSG00000025156	0.2013	0.2013				41.2									10.7	41.3		0.8
																										ENSG00000025293	0.1144	0.1144		5.8		11.8	4.9	12.7	15.3	1.5		13.8	5.9	3.3		17.1				3.5	4.2
																										ENSG00000025434
																										ENSG00000025708	0.2077	0.2077						19.3	18.2			13.8	10.4			14.7	2	5.1	4.2			4.7
																										ENSG00000025770	0.2101	0.2101		7.3		38.2		3.3	1.1	1.7	1.9			16.8	17.5		5.7			1.9		4.4
																										ENSG00000025772	0.1357	0.1357		16.3		24.8	1.6			4.9				5.5	22.3	1
																										ENSG00000025796				0.7		44		4				8.3	8.5		1.9	16.6						16.1
																										ENSG00000025800	0.1399	0.1399				44.3	0.5					0.5	4.1			50.5					0
																										ENSG00000026025	0.1812	0.1812		2.8		16	2.5	31.7	0.9		11.7		1.8			0.3	7.4	8.6			2.1		1.2
																										ENSG00000026036						42.3		7.4		2.1	3	1.7	9.7	17.1			10.1	3.8	3
																										ENSG00000026103	0.1394	0.1394			5.3	35.8	3.4	20.1	10.3					15	5.1				1.1			3.8
																										ENSG00000026297					11.7	39.2				4.8		13.8				19.1		7.1				4.3
																										ENSG00000026508	0.1792	0.1792		9.2		38	10.5	20.6	1.4		4.8					10.2	2	3.4
																										ENSG00000026559	0.2912	0.2912			1	16.6			2.7			4.3		42.5	9.8	7.9						3.5
																										ENSG00000026652						11.8						40.9	17.1	12.4		8.3					9.5
																										ENSG00000026751	0.439	0.439			0.7	18		5.2	1.9	6.8		10.4	12.3	10.1	4.9	19.6		2.2			3.3
																										ENSG00000026950								21.2		22.6			4.1	14.2		34					3.9
																										ENSG00000027001	0.2152	0.2152			2.9	41.5			2.1			7.1	12.7	3.6	5.3	14.6			0.3		1.1	2.4
																										ENSG00000027075	0.3781	0.3781				32.7		7.4	4.6			12.5	8			31.8		0.5
																										ENSG00000027697	0.2717	0.2717			1.5	44.5							8.3	4.2	29.2	2.3		4.4				5.7
																										ENSG00000027847	0.1954	0.1954		10.1		40.4		3.6						3.6	20.3		15	5.4				1.5
																										ENSG00000027869	0.2448	0.2448			3.1	25.1	9.6		1.6		2.4	17.6	14.2	6.2		9.7		1.9				0.5
																										ENSG00000028116						39			23.1	19.3										2.6	16.1
																										ENSG00000028137	0.1503	0.1503			1			27.9	15.8			12	2.7		10.2	18.2		3.1				9.2
																										ENSG00000028203	0.2206	0.2206		2		48.6	2.2						6.6			35.8						4.8
																										ENSG00000028277	0.3644	0.3644			5.1	40	3.4	20.6	14.5	0.4		5.3		10.7
																										ENSG00000028310	0.3181	0.3181				49.1		17.4						5.9	3.9	11	10.8	1.9
																										ENSG00000028528						46.5			21.9					9.9		21.8
																										ENSG00000028839
																										ENSG00000029153						12.9	16.1		25.3			22.6					10.9					12.1
																										ENSG00000029363							4.5	28.4	2.9	2.4		8.3	12.7			23.1			4.3			13.4
																										ENSG00000029364						29.7	8.1		3.9	5.3				9.2		27.7	0.8	2.6				12.7
																										ENSG00000029534								100
																										ENSG00000029639	0.1423	0.1423			2.1	55.6									13.2	29.1
																										ENSG00000029725	0.1638	0.1638		0.2		42.4						1.2	5	3.8		34.1		2.3			5.2	6
																										ENSG00000029993								29.2	17.8		0.9	24.1	7.1			6.4	8.1					6.4
																										ENSG00000030066	0.1625	0.1625		2.1		45.1						9.1				32.9		6.7			1.5	2.6
																										ENSG00000030110						35.7			27.2			8.9				5.7				22.4
																										ENSG00000030419	0.2604		0.2604		2	14	4.3	12.6	7.5	4		15.3	11.3			7		1.4			1.5	8
																										ENSG00000030582	0.1832	0.1832						32.1				22.1	14.7			10.6		4.4	3.6		1.2	5.6
																										ENSG00000031003	0.1247	0.1247				5.7	3.5	32				13.6	11.7			22.5					4.5	6.6
																										ENSG00000031081	0.2417	0.2417		5.3		51.9	1.5	38.1	1.8								1.4
																										ENSG00000031691	0.1209	0.1209			2.9	40.3				2.5						24.5		4.5		13.2		3.2
																										ENSG00000031698	0.3623	0.3623				49		14.7					2.5		15	14.2				4.5
																										ENSG00000031823	0.2098	0.2098		0.5	4.8	28.8	3.3	12.9	3	2.8	2.9	0.1	1.5	4.8	10.8		6.9			2.6		7
																										ENSG00000032219						24.5	3.1	34.8				8.2	4.1	2.1	0.9	9.3				7.1		6
																										ENSG00000032389	0.2841	0.2841			6.4	37.2		12.3		3.6			1.3	6.4	6.6	12.1				6			1.7
																										ENSG00000032444	0.1473	0.1473			4.3	32.3		26.3				8.5	2.9	13.7					1.5			7.7
																										ENSG00000032742						27.7	4.5		12.3							32.1			6.6
																										ENSG00000033011	0.2905	0.2905		1.2		45.8		8.7	6				0.3	1.6	5.4	18.9				7.2
																										ENSG00000033030						30.8										69.2
																										ENSG00000033050	0.3514	0.3514				50.6		11.7		1.2					15.2	17.9
																										ENSG00000033100
																										ENSG00000033170	0.1974	0.1974				42.8	1							6.3		37.1						7.6
																										ENSG00000033178						14	5.8	13.2		6.4						34.6						26.1
																										ENSG00000033327	0.3023	0.3023			1.4	52.3		14.9					8.6	1.4	17.6	3.7
																										ENSG00000033627	0.2685	0.2685			7.1		3.7	39.1				21	10.1		3.2	5.4	1.7	2.5				6
																										ENSG00000033800				0.2	0.9	34.3	3.6	30.2	2.6			2		4.2	3.2	8.6					9.7	0.5
																										ENSG00000033867	0.1532	0.1532				19.7	4	15.7	4			8.5	9.8			26.3					1.7	10.4
																										ENSG00000034053	0.2609	0.2609				17.3	1	7.4	12.9	4	2.8	1.7	5.4	0.9	12.5	14.8					2.1	7.9
																										ENSG00000034063						97											3
																										ENSG00000034152				15.4		35.8						1.8	2.1		2.4	42.3						0.2
																										ENSG00000034510	0.2062	0.2062				45.2		28.1	4.4			2.6			11.7			0.7		2.3		5.1
																										ENSG00000034533	0.2477	0.2477				48.7							13.8		0.9	36.6
																										ENSG00000034677	0.1447	0.1447					6.1	19.9		3.9		11.4	1.7	12.4	2.7	24.2		2.1				15.5
																										ENSG00000034693	0.2095	0.2095				41.6									13.3	31.3						2.9
																										ENSG00000034713	0.1645	0.1645			4	43.1	2.2	20						1.6	8.9	9.3			0			2.7	7.1
																										ENSG00000035115
																										ENSG00000035141	0.279	0.279				49.3		24.4	2.4	1.2				4.4		16.6		1.6
																										ENSG00000035403				16.2			7.2	2.8		1.2		20.9		6.2	29.7	2		0.2
																										ENSG00000035499
																										ENSG00000035664	0.2454	0.2454		1.6	4.6	44.7		13.8	2.7			2.4			11.5	4.1		1.8				3.1	3.6
																										ENSG00000035681
																										ENSG00000035687				3.3		34.7				8			4.6			24.6					0.3	11.7	10.2
																										ENSG00000035720	0.3339	0.3339				30.8								58.1
																										ENSG00000035862	0.2873	0.2873				34.5		7.8	1.9			5.1	5.8		13.8	19.1	0.4	4.5				1.2	0.4
																										ENSG00000035928	0.1945	0.1945				41.6						4.8	8.3			29.9		3.6				5	3.2
																										ENSG00000036054							6.1	11.8		13.6				1		30.1					5.8	31.5
																										ENSG00000036257
																										ENSG00000036448					7.6			4.8	22.5			42.8						8
																										ENSG00000036549	0.1781	0.1781				47.1						2.4	3.3		6.3	30.9		3.3	1			5.7
																										ENSG00000037042	0.158	0.158				26.9				4.9					24.5	12.8		10.3				1.9	8.9
																										ENSG00000037241						52.3		41.3			4.3		2.1
																										ENSG00000037280	0.1731		0.1731	1.6	0.5	27.5	5.5		7.6	1.8		8	19.5		2			15.3	0.4
																										ENSG00000037474	0.1884	0.1884				52.6									24.4	23
																										ENSG00000037637	0.1671	0.1671			0.8	38.5			5.2				2.7		4.4	29.5	2.7			2.4
																										ENSG00000037749							3.9	15.5		3.7		8.7	2.3	18.6		19.9				4.7		15.4
																										ENSG00000037757	0.133	0.133				38.3	0.5	6			3.4			11.7	9.8	6.7	8.9	7.7		6.4	0.5
																										ENSG00000037897	0.1478	0.1478			7.2	44.5				0.1				2.6	27.3	9.1						9.3
																										ENSG00000038002	0.1927	0.1927			4.4	45.5				5.5			29		11.8	3.7
																										ENSG00000038210	0.1776	0.1776				40	1.6			11.5						31.3						15.7
																										ENSG00000038219						46.6		30.8	8.8					1.2	1.3					8.5
																										ENSG00000038274	0.1022	0.1022				4.1		25.6								53						17.2
																										ENSG00000038358	0.2966	0.2966		6.2	1.1	34.1	2.7	16.1	6.1	0.9		1.3	7.3		19.8		0.1	1.3				3
																										ENSG00000038382	0.1783	0.1783			2.5	36.5	4	12.5		1.2	0.8	11.6		14	6			4.3		3.6	3
																										ENSG00000038427	0.1258	0.1258		2.9		10.6	2.4	34.2			12.6		10.3		8.7		7.5						7.6
																										ENSG00000038532	0.1423	0.1423				43.4			11.5					15	9.9	15.3		5
																										ENSG00000038945					3	3.5			42	10.2						15.9	24.1				1.3
																										ENSG00000039068	0.1144	0.1144				23.5			11.7	5	0.4	1.7			7.3	17	11.4	5.6		1.1	4.1
																										ENSG00000039123	0.1641	0.1641		2		44							1			40					6.1	6.9
																										ENSG00000039319	0.1532	0.1532			2.9	29.5	6.2	17.7		3.2		4.2		4.1	11.9		0	0.9	2.5			6.2
																										ENSG00000039523	0.238	0.238		1.4	1.2	17.3	3.6	21.3			1.8	4.5	3.8	15.3		13.5						6.3	5.9
																										ENSG00000039650
																										ENSG00000040199	0.2327	0.2327		1.8		30.2	3.2	10.3		2.6		6.6	6.8			19.6		10.7				8.1
																										ENSG00000040275	0.2067	0.2067				36.7						10.1	13.5			20.3		10.5				8.9
																										ENSG00000040341							2.2	33.4				21.1				13.8				5.7		8.2	14
																										ENSG00000040487	0.1227	0.1227			8.2	27.2	2.8	24.3		2.7	4.1	1.5		10.9		7.8			3.5			3
																										ENSG00000040531						57.2	0.8	6			14.2			20.5			1.4
																										ENSG00000040608	0.1328	0.1328			8.6	32.1	4.5		8.7				12.7	8.4	9.6	11.6	0.2			3.5
																										ENSG00000040633
																										ENSG00000040933	0.1901	0.1901				20.3		12.8				17.6	3.7	8.3		32.4		0.8			4.1
																										ENSG00000041353	0.1543	0.1543		4.8	2.7		5.1	14.1	7	7.4	6.3	14.8	4.4	13.1	3.8		0.3	1.8			2.4	4.4	0.9
																										ENSG00000041357	0.2114	0.2114			1.4	27.7	1.2	22.5	12.3	5.5	0.9	7.8		4.2	1.4		3.9	3.6			4.1	3.4
																										ENSG00000041802	0.2573	0.2573				46								0.1	22.9	26.2		3.5			1.2
																										ENSG00000041880	0.1709	0.1709				45.4		14.5	3.2			0.9			15.9	12.3			7.7
																										ENSG00000041988	0.1014	0.1014				39.9		11.8						18.8			13.3			9.4
																										ENSG00000042062														7.7		60.4						31.9
																										ENSG00000042088	0.3185	0.3185				47.9							1.3		22.9	20.6				0.5
																										ENSG00000042286	0.1188	0.1188				24.8	2.8				1.7				0.1	23.7		6.4		7.2			8.9
																										ENSG00000042317	0.117	0.117		9.4		43.4			15.1			3.5	21.9									6.8
																										ENSG00000042429						32.1										58.4						9.5
																										ENSG00000042445						31.9	1.2									53.2	13.7
																										ENSG00000042493	0.2297	0.2297				21.6		43.1		0.2		11.7	13.3			7				1.8	1.3
																										ENSG00000042753	0.2054	0.2054			4.4	32.8	4	32.5	6.8	0.3		3.9	1.5			3.4	1.4	2.6		3.3		3
																										ENSG00000042832						16.3				24.5
																										ENSG00000042980	0.2601	0.2601		5.6	1.1	5.6	2.2	7.9	2.1	0	2.8	3.6	0.3	27.8	15.4	2.9	1.6		3.8	3.1	6.1		2.5
																										ENSG00000043093
																										ENSG00000043143	0.3395	0.3395				32.8		7.5	7.5			6.7	10.1		11.1	19.6		3
																										ENSG00000043462						82.5		11								6.6
																										ENSG00000043514	0.3233	0.3233		0.6	3.8	34.1	0.3	25.1		1.3	4.9	0.5	0.9		4.3	11	3.6					0.7	0.9
																										ENSG00000044090	0.2768	0.2768		8.9	2.8	37.8		14.1		2.1	0.3		4.2	5.7	16.1	3.5	2.4	0.9				1.1
																										ENSG00000044115	0.1244	0.1244						23.4	19.9	7.7			2		34.1		5.4	7.6
																										ENSG00000044446						45.1	3.8	0.7				13.7	8.3			0.2
																										ENSG00000044459	0.1916	0.1916		2.4		16.9	3.9	20.7	14.6	0.6		16	4.6	1.3	1.9		4.6	5.1		0.1	1.9	1.7
																										ENSG00000044574
																										ENSG00000046647					6	58.7								5.8	8	21.4
																										ENSG00000046651	0.152	0.152				36.5						2.1	7.5			43.3	2.8	4.3			3.4
																										ENSG00000047056	0.1244	0.1244				33.3						10.8				42.7					0.9
																										ENSG00000047188						35.6	7.4			7.8		7.6	1.6			23.9		4.8			3.6	7.8
																										ENSG00000047230	0.1607	0.1607				46.3						1.8			24.4	24.8					2.8
																										ENSG00000047249	0.1275	0.1275			7	35.6		24.5	6.4			1.4				14.2		10.8
																										ENSG00000047315	0.1265	0.1265		1.5		39.2						5	10.2			37.7		0.4			1.6	4.6
																										ENSG00000047346	0.1352	0.1352					7.2	23.8					14.2			24.6						18.3
																										ENSG00000047365	0.2602	0.2602		3.6	2.5	7.1	2.6	9.6	4.4	6.6		11	6.7	4.9	9.3	16.3		2.3			1.5	4.2	3.6
																										ENSG00000047410				1.9			2.4	32.4	7.1			2.7	11.8			22.1		5.2		8.3		6
																										ENSG00000047578						10.4	13.8						8.2				2	17					11.3
																										ENSG00000047579
																										ENSG00000047597								79.7						16.3			4
																										ENSG00000047621						39.6			15	9			0.5			23.3						12.6
																										ENSG00000047634
																										ENSG00000047644	0.251	0.251			4.5	49.8	5	29.4							10.7							0.6
																										ENSG00000047648
																										ENSG00000047849	0.2351	0.2351		3		53.7	0.7					10.4	9.7			22.6
																										ENSG00000047932	0.1288	0.1288				38.5	5.5					11.1				32			0.2			12.6
																										ENSG00000048028	0.4038	0.4038			0.4	17	0.1	8.3				17.7	9.3		13.4	19.2		3.1			3.9	2.6
																										ENSG00000048052	0.1366	0.1366		15.4	0.4	46.1	3.5	9.6				0.7	3	9.7		1.5	3.2	6.1			0.7
																										ENSG00000048140	0.3209	0.3209			5.6	36.2	1.2	21	6.3		1.4	5.8	1.3		0.7	18.4				2
																										ENSG00000048162	0.2063	0.2063				42.1		18.6						11.3	6.2	4.1	4.8			4		4
																										ENSG00000048342				7.1		31	0	15.1	7.5			3.6	1.4				4.6	2	11.2				7.2
																										ENSG00000048392	0.1778	0.1778			0.6	35.2	4	21.3		4.8		4.8	1.9	3	13.4				0.1			10.9
																										ENSG00000048405	0.1568	0.1568				17	2.9	21.2				8.8	3.4			27.8					5.2	9.5	4.1
																										ENSG00000048462						22.3					8.6		3.1	37.7			8.4					1.3
																										ENSG00000048471	0.186	0.186			2.2	54.3	3		0					40.4
																										ENSG00000048544	0.1525	0.1525				46.8			1.3	1.6						35.7						10.3	4.3
																										ENSG00000048649								31.1	6.3			12.3	6.4			25.7		1.7		10.7		5.8
																										ENSG00000048707				4.1		26.2	0.8	7.6	10.6			9.6	6.3			21.4		6.9		3.2	3.3
																										ENSG00000048740	0.1389	0.1389			4.8	20.1	4.3	20.3	2.6	2.1	1.7	7.7		6.9	7.3	5.7		0.5			2.2	4.9	0.1
																										ENSG00000048828
																										ENSG00000048991	0.1724	0.1724		3		54.4										42.6
																										ENSG00000049089					17								39.1			2				40.6		1.4
																										ENSG00000049167	0.1487	0.1487			6.2	36.7		13.7				1.7	2.5		1.8	24	5.5	1.9	6
																										ENSG00000049192	0.1297	0.1297				35.7							8.5	9.3		44.2		2.3
																										ENSG00000049239						51	3.2					1.2				0.7	43.8
																										ENSG00000049245	0.168	0.168				20.1		2.5	15.5	11.3		5.7	4.9		20.5		6.6	11.8			1.1
																										ENSG00000049246	0.1886	0.1886			1	45.6		0.8	1			17.9	13.7			10.4						9.7
																										ENSG00000049247					6.1	23.4			11.6			36.7	16.9				4.3	1.1
																										ENSG00000049249					10.6	23.2								3.4	3.2				19.1	3.6			21
																										ENSG00000049323
																										ENSG00000049449	0.1801	0.1801				45.5	3.7	14.4	12							11.9	2.2	1			3.6		2.9
																										ENSG00000049541								75.7	11				13.3
																										ENSG00000049618	0.1607	0.1607		2.4		30.1	4.4	6	9.7			10.3	6.5	6.1		21.9		2.6
																										ENSG00000049656	0.3146	0.3146				50		18.7					1	5.3	3.1	14.6			5
																										ENSG00000049759
																										ENSG00000049768	0.1913	0.1913			2	31.9	7	10.1	0.2			3.1		11.8	21.1		3.6			7.4		1.9
																										ENSG00000049769	0.1224	0.1224				44.3									55.1			0.5
																										ENSG00000049860	0.2516	0.2516		0.2	4.4	16.8	2	33.8	2.7		4.1	3.1		9.2			7.5	5.4				2.9	3.8
																										ENSG00000049883	0.1067	0.1067				57.6									15.1	16.3						4.7
																										ENSG00000050030															100
																										ENSG00000050130
																										ENSG00000050165						43.9										48.5
																										ENSG00000050327					7.6	23.4			3.8	3.8			9.4	10.6	15.3		9.6				4.7
																										ENSG00000050344						100
																										ENSG00000050393					2.2	34.9				0.4		13.5		13.2			0.5	15.2		18.8		1.2
																										ENSG00000050405	0.3165	0.3165				33.3		10.2				3.4	6.6			37		1.7			2.6
																										ENSG00000050426	0.2492	0.2492				47		7.3	1.6						20.6	15.6
																										ENSG00000050438						46				19.6		4.9	18.5			7	2.7				1.3
																										ENSG00000050730	0.1704	0.1704		0.5	8.8	12.5	0.3	3.4	11.4	8.2			17.2	5.6		29.2	2.8
																										ENSG00000050748	0.1613	0.1613			3.8	47.3							8.7		2.3	32.6						5.3
																										ENSG00000051009				12.4		27.4	1.2						8.3	4	4.5						1.9	3.4	4.3
																										ENSG00000051108						40.1		45.1	7.1												6.1	1.6
																										ENSG00000051128	0.2936	0.2936				8.5	1.3	48.8				7.6	6.5			24.4					0.9	2.1
																										ENSG00000051180					8.4	30.1			17.9							13.1	10.8	0.3
																										ENSG00000051341				2.8		23.6	3.8	9.2	6.6			3				10.3		11.2		9.4	5	1.7	13.2
																										ENSG00000051382							2.5							39.8			18.1			33.7		5.9
																										ENSG00000051523
																										ENSG00000051596	0.1405	0.1405				41.8		8.3						0.5	28.8	14.1
																										ENSG00000051620	0.2141	0.2141			0.3	45.1	5.8				1.8		9	12.7		10.1	0.1	2	1.9
																										ENSG00000051825	0.2199	0.2199				40.7	3.6					8.3	1.9			36.9					5.3	3.3
																										ENSG00000052126	0.2103	0.2103		5.3		15		8.7	7.7	8.3		9	23.5	1.9	5.3	10.7	1.9	1			1.7
																										ENSG00000052723	0.1296	0.1296				33	5.9					6.4	4.8			29.8				3.2	2.5	14.5
																										ENSG00000052749						17.9	7.1	16.4	2.7	0.7		7.4				22.3					6.3	8.1
																										ENSG00000052795				5.2		54.5				7.1		1.6				22					9.6
																										ENSG00000052802	0.1025	0.1025			3.7	36.7	7.1			1.8		12.1				26.5						12.1
																										ENSG00000052841						43.2	0.3									42.3		3.1			0.1	10.9
																										ENSG00000053254	0.1248	0.1248				1	4.9	15.8	11.2	2.2		20.5	12.7	11		6.9					4	9.6
																										ENSG00000053371	0.2114	0.2114			5.5	42.2		21.2		2.3			2.8	3.2	12.6	1.4				2.8		0.5
																										ENSG00000053372	0.317	0.317			1.8	50.1	1	13.9	0.1					2.9	21.5	4.6	0.3			3.9
																										ENSG00000053501	0.2328	0.2328		4.3	4.2	27.8	1	13	2.4	1.3		4.1	0.9	9.3	13.1	3.1			1.4			4.4	2.2
																										ENSG00000053524						37.6	1.7			3.9		23.9	18.8		0.3		4.9	3.6				5.4
																										ENSG00000053770						6	6	30.7								33.8						23.5
																										ENSG00000053900				5.4	2.7	20.4	1.1			11.7			2.1	6.3		20.6	0.6					16.7
																										ENSG00000053918	0.2033	0.2033			2.2	9.1	1	31.8		7.8		10.5	5.3	1.5		12.6				8.5		1	2.8
																										ENSG00000054116					2.8	34.6		18.1	25.8			2.6			1.6			8		6.6
																										ENSG00000054118								41.8				0.8	9.2	2.2		44.8						1.1
																										ENSG00000054148	0.2387	0.2387			5	44.4		34	0.5	1.5			3.6		5.8							5.3
																										ENSG00000054179
																										ENSG00000054219					4.8		12.8	4.7	9.4			8.5	31.5	19.5								8.9
																										ENSG00000054267						15.7	1.3	29.4	5.6			12.8	5.4			12.7				11.1	1.1	4.9
																										ENSG00000054277	0.2599	0.2599			4	36.9		17.6	8.1				0.8	18			5.2		4.5		0.2
																										ENSG00000054282	0.1241	0.1241		8.1		18.8		16.8		5.3	4.2		1.1	11.1		3.9	9.4	4.9	2.9			2.2	5.9
																										ENSG00000054392	0.1131	0.1131				38.5							6.5	11.3		23.3	9.7		8			2.6
																										ENSG00000054523	0.1564	0.1564		11.1		38.3	2.5	18.1		6.1			0.3	5.2	18.4
																										ENSG00000054611					12.5	31.5					0			45.3						10.7
																										ENSG00000054654	0.1497	0.1497		7.2			0	23.1	9.6	2.8	0.9	14.4	7.3	9.3		11.6	1.7	5.5				3.8
																										ENSG00000054793	0.1346	0.1346		7.6		15.3	1.8	8.6		7.2	10	12.7		1.2	27.8		2	1.5	0.8			3.5
																										ENSG00000054965						14.1	3.3	11.9				12.6				46.8		1.2
																										ENSG00000054967	0.105	0.105				3.7		17	9.2		6.8	18.9	7.6	5		13.6		3			3.1	12.2
																										ENSG00000054983					3.6				5.4	3		20.5	1	28.5	0.6						10.7	9.5	8.9
																										ENSG00000055044	0.2525	0.2525				51.8									6.3	34.2						0.5	0.9
																										ENSG00000055070	0.2455	0.2455			2.2	45.7		7.9			3.3		5.3	5.2	7.2	17.6				5.7
																										ENSG00000055118				6.3	14.8	19.4				7.1	1.5			14.8	11.3			3.4		3.8			7.4
																										ENSG00000055130	0.209	0.209				52									9.1	33.8
																										ENSG00000055147						44.6			0.4		0.8	1				35.1			4.6			13.6
																										ENSG00000055163	0.2599	0.2599			2.8	25.1		9.4	11.5			5.7	6.6		12.7	22.2		3.9
																										ENSG00000055208
																										ENSG00000055211
																										ENSG00000055332	0.103	0.103				15.7			5.9	33.7		1.7	13.8				1.4	27.8
																										ENSG00000055483	0.3329	0.3329				44.3			1.1				6.5		17.4	22.1	0.9	3.1
																										ENSG00000055609
																										ENSG00000055732							57.5															20.9
																										ENSG00000055917	0.1312	0.1312					7.1	24.3	7.7			9.8	7.2	6.1		22.8						15
																										ENSG00000055950	0.2865	0.2865		7.1		41.7		16.9		1.1			1.1	3.6	18.4	2.4	0.7						0.2
																										ENSG00000055955				9.9	4.5	8.8	2.2	1	13.1		4.6	7.1		1.5	11.6	12.9	5.2	5.3		0.4		1.4	3.9
																										ENSG00000056050					3.3	41.5	2.3	11.7	11.7				5.5			14.4		6.3				3.3
																										ENSG00000056097				3.5		36.3		4.2				9.1	9.9			31					0.4	5.5
																										ENSG00000056277	0.1382	0.1382				32.4	1.9	9					2.8			40.7						13.2
																										ENSG00000056558	0.2258	0.2258				41	3.4								30.5	25
																										ENSG00000056586						4.9	0.4	30.7		1.5		11.2	4.4			25.5					5.6	15.8
																										ENSG00000056972	0.1416	0.1416				37.6	1.6		8.2					7.8	34.3
																										ENSG00000057019						24.3			10.3			10.9	0.9	0.8	36.8		2.3
																										ENSG00000057252							9.8	0.2		3.1	6.3	9		11	5.6	19.5	11.3			0.6	2.5	9.6	8.7
																										ENSG00000057294
																										ENSG00000057608	0.1056	0.1056		3.1		39.7	4.1	14.6	24.2		6.4	1.4		1				2.3		3.1		0.3
																										ENSG00000057657	0.3277	0.3277						13.3	7.1	2.3		21.9	16.3	13.2		3.7	1	2				6.8
																										ENSG00000057663	0.1444	0.1444				37.4	0.3			4.9		0.2	1.2	1.8		32.9						7.8	5.2
																										ENSG00000057704	0.2878	0.2878			2.1	45.1	0.5	22.1				4.6		1.3	20.3		0.8					3.2
																										ENSG00000057757						97.3										2.7
																										ENSG00000057935	0.2329	0.2329				44.8									25.2	23		1.8
																										ENSG00000058056	0.1635	0.1635				39.1		0.7	1.4			3.8	9.7			32.7		2	6.4			4.2
																										ENSG00000058063	0.1225	0.1225			0.6	24.3	6.2	25	0.7	2		10.7		8.6		1.4				7.7		2.2	3.6
																										ENSG00000058091	0.1837	0.1837		0.1	0.6	28.2	1.2	19		1.8			6.5	17.6	17.2						1.3	6.5
																										ENSG00000058262	0.2994	0.2994				50.8		24.5		3.9			3.2		4.3	11.5			1.8
																										ENSG00000058272	0.1009	0.1009				20.5	5.5	22.8	0.3			8.1	3.3	8	4.9	8.4				2.2		6.7	2.3
																										ENSG00000058453	0.1655	0.1655				46.9		2.6					6.9	15.5	19.7		1.6	6.8
																										ENSG00000058600	0.3162	0.3162				45.9									25	17.2		5.8
																										ENSG00000058668	0.2112	0.2112				0.6		22.3	1.4			17.7	20.6	14		9.5				6.2		1.6
																										ENSG00000058673																100
																										ENSG00000058729	0.1914	0.1914		0.7		51.3							1.2			34.1						12.7
																										ENSG00000058799	0.2917	0.2917		1	6.1	39.1	0.8	19	8.6	0.3	2.4	0.7	5.6	0.7	14			1		0.6
																										ENSG00000058804	0.1837	0.1837				45.9	2.5			0.9					0.6	33.4						16.7
																										ENSG00000058866						21.6							4.3		16.7	18.9
																										ENSG00000059122	0.1141	0.1141				46		3.5		0.8				2.2	38.1		4.5	4.8
																										ENSG00000059145
																										ENSG00000059377	0.1998	0.1998				37.8			7.3			10.7	5.5		16.6	17.7	0.7	3.7
																										ENSG00000059378	0.2224	0.2224		5.6	3.5	5.2	0.7	1	9.1	1.9	3.3	5.5	6.4	3.1	1.2	3.2	0.8	4	13.1	8	17.1	7.1
																										ENSG00000059573	0.3504	0.3504				42.8						2.3	1.2		10	27.8	2.3	4
																										ENSG00000059588	0.2132	0.2132				48.2									12.9	33		6
																										ENSG00000059691	0.3073	0.3073				51.4		26.4	6.1			1.7			7.3	6.3				0.8
																										ENSG00000059728	0.3242	0.3242			6.1	46.2	1	20		2.6			3.3	4	14.9	1.1		0.4				0.4
																										ENSG00000059758	0.148	0.148				0.6		33.1		2.2		18.3	7.9	4.4		19.6					5.1	8.9
																										ENSG00000059769	0.21	0.21		1.8	3.2	38.3	1.5	24.4			1.6		0.7	2.3	12.4			3.1	1.5			9.2
																										ENSG00000059804	0.3347	0.3347			1.5	45.6		17.9		3.8	3.5		7.9	0.4	14.4			4.1		0.9
																										ENSG00000059915	0.1285	0.1285				18.3	3.4								29.3		4.1			19
																										ENSG00000060069
																										ENSG00000060138				53.5				2.5					23.4			20.6
																										ENSG00000060140	0.1412	0.1412				11.4		4.6			7.4			29.8		40.2						6.5
																										ENSG00000060237
																										ENSG00000060339	0.1481	0.1481				43.5	2.3					6.2	6.8			28.5		2.6		5.4		4.7
																										ENSG00000060491
																										ENSG00000060558	0.359	0.359			0.7	23.9		39	0.2			5.3	5.4			5.7	4	7.7				2.5
																										ENSG00000060642	0.1994	0.1994				34.1						12.2				16.6	26.2	10.9
																										ENSG00000060688	0.371	0.371				49.2		5.7						1	8.5	29.6				1.9
																										ENSG00000060749				5.8		43.8	8.4					3.7				20.2				11.4		6.7
																										ENSG00000060762	0.1137	0.1137			2.3	35.8		20	15.8							9.6	0.1	9
																										ENSG00000060971	0.1723	0.1723		8.5	1.4	15.5	0.3	19.5	8.1			8.5	10.2			19.8	2.3			1.1		4.8
																										ENSG00000060982				14.7									12.8		12.7		30.5		7.7	1.5			19.5
																										ENSG00000061273	0.1036	0.1036		8.5	5.3	4.7	4.2		7		3.7	6.4		0.5	20.8	15.2	3.1	3.4				7.9	2.2
																										ENSG00000061337
																										ENSG00000061676	0.1901	0.1901		1.1	3.6		2.1	20.2	4.3	5.6		18.1	7.9	9.2	1.6	1.3		7.1	4.9			2	0.3
																										ENSG00000061794	0.2567	0.2567			1.1	43.4		16.6	1.9		6.8				10	14.3	0.9					4.9
																										ENSG00000061918	0.1272	0.1272		1.4				6.8		15.5	10.3	9.3		19.6		10.4	4.2	2		9.1			1.4
																										ENSG00000061936	0.1838	0.1838				42.3								12.9		18.5	10.4	15.9
																										ENSG00000061938	0.128	0.128		2.1	1.8	15.2	2.2	20	0		7.1	4.2	1.8	3.4	8.4	17.3	4.7	2.4				9.4
																										ENSG00000061987							5.5	22.4				11.3	3.8	6.8		23.5					3.5	18.5
																										ENSG00000062194
																										ENSG00000062282	0.2762	0.2762		1.7	2.3	47.3		18.7		1.7	0.9	2.1	2.1		7.6	12.4	3.2
																										ENSG00000062370						23.3				18.5		0.5	0.5	37.7						19.5
																										ENSG00000062485	0.1867	0.1867				69.3								6.5		24.2
																										ENSG00000062524	0.1318		0.1318		1.1	33.4	0.2			4.6		11.4	8.3			1.3	12.7	10.5				1.6	3.9
																										ENSG00000062582	0.1763	0.1763		5.9	0.3	27.8	5	23.3	0		3.1	3.1	1.7	0.2	11.9		2.1	5					5.2
																										ENSG00000062598												26.8					73.2
																										ENSG00000062650								23								48.9					15.4	12.7
																										ENSG00000062716	0.33	0.33			6.4	46.7		18.5		0.8			1.7	2.1	14.9	4.8							2.9
																										ENSG00000062725						4.4	21.3	16.1								27.1						31.2
																										ENSG00000062822	0.2519	0.2519			9.3	36.8	0.9	21.2	0	2.2			3.8	11.5	6.4				2.2			5.9
																										ENSG00000063046	0.2567	0.2567				48.7	1.2			2.3			2.4	5.9	10.8	27.3		1.4
																										ENSG00000063127	0.2093	0.2093				21.4								35.5			18.9	9.9			0.6
																										ENSG00000063169
																										ENSG00000063176	0.1254	0.1254			1.2	43.9		26		0.8				9.6	5			2				11.4
																										ENSG00000063177	0.2492	0.2492				38		6.6		7.8				12.6	18.1					5.3		1.2
																										ENSG00000063180	0.1917	0.1917			11.7	32.3							13.7	4.6	26							1
																										ENSG00000063241	0.2089	0.2089		2.6	4.2	37.1	1	18.3	7.5	2.4	4.3	4	1.4	9.1	1.6	1.5	2				0.3	2.5
																										ENSG00000063244	0.1621	0.1621				40.2	1.3	20.9		5.2	2.9		2.5	7	5	0.6	2.7	1.4		0.2		10
																										ENSG00000063245																100
																										ENSG00000063322	0.2872	0.2872				43								4.6	11.9	25.3		5.2					1.1
																										ENSG00000063438				3.3			12		5.9		9	2.8			2.9	16.3		6.9		24.4		16.5
																										ENSG00000063587	0.2342	0.2342				48.7								5.8	18.3	27.2
																										ENSG00000063601						16.8		17.5				5.8	0.3	8.5		26.4		5.6			3.2	5.6
																										ENSG00000063761	0.244	0.244		6.6		35.4	6.3	24.4	0.3			6.2		10.6	4.9			1.2					1.6
																										ENSG00000063854
																										ENSG00000063978	0.2701	0.2701				42.9						1.4	10.4			45.2
																										ENSG00000064012						37.3							27.8
																										ENSG00000064102	0.2199	0.2199				47.6							7.6		3.2	37.1						4.5
																										ENSG00000064115	0.126	0.126				40.3		6.1	10.9							28.9					5.8	8
																										ENSG00000064199				2.9		22.7		17.8				7.8	7.8				9.3			9.2			7
																										ENSG00000064201	0.1486	0.1486				38.1	1.6	15.7			15.1	0.3			2.3		8.2				4.6	14.1
																										ENSG00000064225	0.2356	0.2356			1.1	29.3	1.9	8.7				14.6	12.3	13.1	6.6		1.7	2.2
																										ENSG00000064300
																										ENSG00000064309						49.8									50.2
																										ENSG00000064313					0.4	29.1	6.2	10.6				9.1	1.2			32.6						10.6
																										ENSG00000064393						2.2		18.5	22.2			39.9		3.5						13.8
																										ENSG00000064419
																										ENSG00000064489						38.1		2.7		11.6						34.3					13.3
																										ENSG00000064490						12.3		11.4					4.5							52.2	19.6
																										ENSG00000064545	0.2465	0.2465		4	6.6	38.7		23.6			1.2			0.3	15.7	1.1	0.6					0.5	0.9
																										ENSG00000064547	0.2635	0.2635		13.9		43.4						6.2	7.7			20.2						2.2	1.7
																										ENSG00000064601	0.1645	0.1645						28.9				1.5	13.9			34		3.3				1.4
																										ENSG00000064607						29.8	1.1			6.9		9.7				19	13.4	17.8
																										ENSG00000064651	0.2089	0.2089				18	1.7	17.1	0.8			10.1	9.1			19.9		2.1	3.9			9.8
																										ENSG00000064652	0.1362	0.1362				38.9		3.8	11.6	14.9		8.6					18.8				3.5
																										ENSG00000064666	0.1175	0.1175			4.3	33.6	2.7			11.1		13	12			10.8			1.5		4	6.9
																										ENSG00000064687						31.5				2.4			20.5			4.1						6.1
																										ENSG00000064703	0.1767	0.1767				40.6						9.5	9		3.9	32.1	1.1		3.7
																										ENSG00000064726	0.1556	0.1556				31.8	4.7			5.2		6.5	6.1	6		16.3						16.4	6.7
																										ENSG00000064763	0.1526	0.1526		3.1	10.9	12.1	3		2.5	6.8	2.6	5.4	7.1	10.5	15		7.1	1.2			0.7	4.1	4.8
																										ENSG00000064886						57.1			9.6		7.4		0.6			25.2			0.1
																										ENSG00000064932					0.7	58.5										38.8						1.9
																										ENSG00000064933	0.1388	0.1388				36.3	4.5					13.8	3.5			30.6						11.3
																										ENSG00000064961					2.1	34.1		27.1		4	0.6			12.6		5.3						14.2
																										ENSG00000064989				0.6		25.2	12.7	15.6	0.4	6.9			1.6	5.8		3.8	6	1.5	2.2			6	7
																										ENSG00000064995	0.1979	0.1979			5.1	43.9		25.4	10.7	0.1		3.3				11.5
																										ENSG00000064999
																										ENSG00000065000	0.1484	0.1484			6.6	40		21.8		7.4		0.1	5	0.1	11.2		0.2	4.2	1.1			2.4
																										ENSG00000065029	0.2931	0.2931				43.5								11.2	9.3	18.4	5.5	12.1
																										ENSG00000065054						86.4	6.5							7.1
																										ENSG00000065057					3.1	41	0.4	11.8		4.5				16.6	0.8		3.1	4			8.6
																										ENSG00000065060						39.8				5.5						27.8		7.9			19
																										ENSG00000065135
																										ENSG00000065150	0.2528	0.2528				49.6									13.1	29.5						4.2
																										ENSG00000065154											22.6					39.6		2.1			35.6
																										ENSG00000065183	0.2117	0.2117				52.8								3.9	0.5	41.7						1.2
																										ENSG00000065243	0.109	0.109			3.6	29.2	6.3	21.9	0.4	2.2		6.3		5.4	10.3	4.7		1.7	3.5			4.6
																										ENSG00000065268	0.1768	0.1768		2.6	4.8	34.8	0.1	17.2	0.3	1.2	1.7	0.3			16.4	1.2						6.8	1.5
																										ENSG00000065308	0.1551	0.1551				42.7	0.6					10.1	9.8			25.7		3.6		7.1		0.3
																										ENSG00000065328						100
																										ENSG00000065357	0.2021	0.2021		8.5		40.6	2.5								47.8			0.6
																										ENSG00000065361						60.3				39.7
																										ENSG00000065413
																										ENSG00000065427	0.3069	0.3069				54.9		5	9						16.9	14.1
																										ENSG00000065457	0.116	0.116		3.5		24.2		14.7					8			43.1
																										ENSG00000065485	0.2618	0.2618		4	5.9	24.3		24.7	6.6	7.2	7.2	4.3	1.1	1.6	3.3	1.1	0.9	2.8			3.1	1.9
																										ENSG00000065491						55.3					7.8					31.3		5.6
																										ENSG00000065518	0.2027	0.2027				46.4	0.8	21.8	5				1.2	4.2	6.3	4.3
																										ENSG00000065526
																										ENSG00000065534
																										ENSG00000065548	0.1288	0.1288				42	3.8	3.9		2.2		4.3				20.6	0.2					7.6	10.7
																										ENSG00000065559	0.1837	0.1837				55		34.6						0.1	5.8							4.6
																										ENSG00000065600	0.2455	0.2455		0.7		49.4		28.8								13.1					0.3	7.6
																										ENSG00000065613						16.3		29		2.4		4.7	20.8	12.6		2.1				3.7		8.4
																										ENSG00000065615	0.2283	0.2283			1.6	42.7	2.5	17.6		2.1				6.1	17.8							9.6
																										ENSG00000065618				7.8	0.8	25.4	9.2								15.2								41.6
																										ENSG00000065621
																										ENSG00000065665				9.6	7.1	23.7		18.3		8.6	8.2			0.1								6.1
																										ENSG00000065675	0.3545	0.3545				44			3.2			5.5	10.5		2.3	34.6
																										ENSG00000065717	0.2592	0.2592		4.4		20.5	2.4		9.3		2.4	2.7	1.4		29.5			7.9	1.4			9.9
																										ENSG00000065802	0.3206	0.3206				44.9						0.5	7		7.2	28.3	0.7	11.5
																										ENSG00000065809	0.153	0.153			2.3	15.5		20.1	1.9			5.5	7			28.5			1.5			11	6.6
																										ENSG00000065833
																										ENSG00000065882	0.2803	0.2803			4.1	38.9	1.8	17.1		0.7	2.3	2	5.2	6.9	14.5	3		0.8			1.1	1.5
																										ENSG00000065883	0.1142	0.1142				9.9	5.5	21.4	2.9			14.8	11.7			21.8		2.1			6.4	3.5
																										ENSG00000065911	0.1661	0.1661				33.8		7	35.9	0.5	0.4		13.8					1.3				2.3	4.9
																										ENSG00000065923	0.143	0.143			9.3	31.9	4.4	0.1	4.1				5.7	36				2.1			6.4
																										ENSG00000065970							5.1	22.3	24.4			16.3	14.9			4.6	6.1				6.4
																										ENSG00000065978						50.8			1.7		8.2							24.1			15.1
																										ENSG00000065989	0.1751	0.1751		1.1	7	39.1	3.8	25.6		1.4		15.3	2.1				2.7	0.9			0.9
																										ENSG00000066027	0.1279	0.1279				40.9	2	11.8						17.9	15.1					1.2		11.1
																										ENSG00000066044	0.3345	0.3345				53.3	2.5	5.2					7.6	2.6	14	14.7
																										ENSG00000066056						4.5	6		13.4		42.2
																										ENSG00000066084	0.1238	0.1238				53.1		46.8												0.1
																										ENSG00000066117	0.2993	0.2993				49.4									4.7	40.6	5.3
																										ENSG00000066135				3.2		48.5						8	8.1			30.3		1.9
																										ENSG00000066136	0.1146	0.1146		4	13.5	33.1					2.3	18.2	4.6		4.2	1.6			1.1	5.1		8.3	4
																										ENSG00000066279						22	27							15.3			2.3					21.9
																										ENSG00000066294	0.1921	0.1921		0.6		40	6.4						12.6			29.1					6	5.3
																										ENSG00000066322	0.1661	0.1661		1.5		32.7		35.5	4.1		1.3	4.3								10.8			8.5
																										ENSG00000066336	0.1742	0.1742				38.9		2.6				8.3	4.5			28.8		2.9				14
																										ENSG00000066379					2.5	41.6										55.8
																										ENSG00000066422	0.1156	0.1156				18.4	3.2	19				11.1	6.9			28.6			1.7		3	8
																										ENSG00000066427						29.4				46.8												23.8
																										ENSG00000066455	0.115	0.115			4.8	31.3		0.9				4.1	9.8			26.4			1.6			8.6	10.6
																										ENSG00000066468						50.9	6.9			17.9								24.3
																										ENSG00000066557	0.1383	0.1383				30.9	16.1				1.4	13.1				27.5						11
																										ENSG00000066583						43.3				0.7		13.3				33.9						8.7
																										ENSG00000066651	0.2024	0.2024				53	2.8								10.1	34.2
																										ENSG00000066654	0.1948	0.1948				41.9	2					7.2	7			31.2					1.4	9.4
																										ENSG00000066697						14	0.3	18.1				26.5						36.3		4.8
																										ENSG00000066739						4	4.7	19.1	5.5			19.2	4			18.2		6.3	14.4			4.6
																										ENSG00000066777				4.8			6.2	25.6	5.6			12.7	5.3	7.5		18.7				6.3		7.4
																										ENSG00000066827						43				10.6		9.1	4.9	9.8		17		0.2		5.5
																										ENSG00000066855	0.1608	0.1608				38.3						11.1		3.5		22.2		18.9				1.2
																										ENSG00000066923				1.1		37.5	5.5							51.8			4.1
																										ENSG00000066926								99						1
																										ENSG00000066933	0.1779	0.1779				30.1	3.4	4.4	5.9			11.8	7.2			21.9		5.2	0.4	5.4	0.2	4
																										ENSG00000067057	0.1518	0.1518				47.8	4.1				1				17.9	28.3			1
																										ENSG00000067064	0.2246	0.2246			0.6	17.7	6.6	12.1		3.1		13.4	1.6	4.1	15.9			0		0		11.9	3.2
																										ENSG00000067066										96.9											3.1
																										ENSG00000067082	0.2684	0.2684		4.4	4.2	20.2	4.8	12.8	4.7	6.4		11.1	1.6	4.9	11.8			0.4		0.7		2.4	0.5
																										ENSG00000067113	0.1921	0.1921				54.6								6.5	36.1			2.8
																										ENSG00000067141	0.3323	0.3323		0.2	0.2	18		14.7	8.9			19.1	14.7			6	2.9	10.5	0.3	3		1.5
																										ENSG00000067167	0.123	0.123				29.9	10.9					3.4	6.1	2.7		22.3						24.7
																										ENSG00000067182	0.2577	0.2577			1.5	48.6		15.4		0.8		2.8	4.9		15.3	5.6		0.6				4.4
																										ENSG00000067191	0.2535	0.2535		2.5		32.5		4	4.9	1.6	4.3	2.7	5		2.4	17.2	7.4	6.7				1.8	0
																										ENSG00000067208							10.2	14.1	5.3		3.5				26.3		6.4			5.8		12.6	9.7
																										ENSG00000067221	0.1215	0.1215		12.1	1.9	22.9		11.5	5.1	3.2	7.8		1.4	8.6	11.2	4.4	2.5	3.7	1.4		2.3
																										ENSG00000067225	0.2766	0.2766				28.9		37.2		0.7	0.5	9.9	6.6				1.1	1.8	5.2	0.7			0.2
																										ENSG00000067248	0.1276	0.1276				39	6.6			1.3		1.3	3.5			27.7						13.1	7.5
																										ENSG00000067334	0.1207	0.1207				47.3							4.1			31						7.7	8.6
																										ENSG00000067365					15.5				4.3		37.1		32.8
																										ENSG00000067369						23.6		11.8	6.6			3.5	7.4	0.5	14.9	22.5		9.3
																										ENSG00000067445						23.4		19.9				53.6						3.1
																										ENSG00000067533	0.1894	0.1894				52.6							0.9		9.2	35.8		1.4
																										ENSG00000067560						7.2		10.1	23.1		4.6	2.6	5.9		34.3			12.2
																										ENSG00000067596
																										ENSG00000067601															22.2			77.8
																										ENSG00000067606									21.1	3.7	37.2		16.2				3.8			18.1
																										ENSG00000067704	0.2318	0.2318		8.7		51.8		8.2							1.1	29.9		0.4
																										ENSG00000067798						34.9			23.8					41.3
																										ENSG00000067829	0.1924	0.1924				46.1		40.3				1.7		1.9						5.7		4.2
																										ENSG00000067836	0.1942	0.1942				23.4		33.3	5.4	7.7		8				9.6						6.3
																										ENSG00000067840	0.372	0.372			3.4	14.7	4.7	5.9	3.9		2.7	14.7	20.2	3.3			11	1.5			1.2		1.8
																										ENSG00000067900
																										ENSG00000067955	0.1234	0.1234				34.2	9.9			4.1		1.6				27.8						22.4
																										ENSG00000067992	0.265	0.265			3.7	43.7		26.9					2.6	10.4	5.9		0.9	1.3			4.6
																										ENSG00000068001						10.1	1.5	31.1	2.8				1.8		5	16.4		1.3	9			1.7	9.3
																										ENSG00000068024
																										ENSG00000068028	0.2618	0.2618		0.8		34.3				0.8	2.4	14.2	18.7			2.9	11.6	4.2					0.8
																										ENSG00000068079	0.2191	0.2191						1.7	37.8			16.2	18.2					10.8	10.2			5
																										ENSG00000068097	0.111	0.111			1.5	48.7						2.4		6.3	15.2	8.7	8.6		3.8		4.8
																										ENSG00000068120	0.1128	0.1128		6		21.5		21.8		7.3		6.1	9.4	10	2.6		2.7	3.3		9.1
																										ENSG00000068305
																										ENSG00000068308				16.2		40.7						16.1	5.3			5.5						16.1
																										ENSG00000068323	0.2443	0.2443				44.9			2.3			8.4	8.6			23.2		1.9				10.6
																										ENSG00000068354	0.1177	0.1177		2.1	1.3	23.7		10.4	9.4		7.9	10.9	11.6			19.5				3
																										ENSG00000068366	0.1913	0.1913		3.4	4.2	31.1	3	18.3	0.3	3.1		3.6	2	3	14.8			1				3.4	2.2
																										ENSG00000068383	0.2006	0.2006			4.4	38.9	4.9	19.1	6.6		3.7		1.5			18.3					1.6	0.9
																										ENSG00000068394	0.1254	0.1254				49.3		16.1							4.3	21.9				8.4
																										ENSG00000068400
																										ENSG00000068438	0.3421	0.3421				49.1		14.4						7.6	13.1	13.9		1.9
																										ENSG00000068489						0.1	9.5			83.4				7
																										ENSG00000068650
																										ENSG00000068654	0.2189	0.2189				53.5						1.1	5.1		14.5	25.8
																										ENSG00000068697	0.1946	0.1946			1	15.9	2.8	28.1	13		1.9	1			13.9		4	11.8				6.8
																										ENSG00000068724	0.3825	0.3825			2.5	35.9	1.3	34.5		0	1.6	4.4		7.6			3.9	2.1				2
																										ENSG00000068745											20.8					36.9	33.3	9.1
																										ENSG00000068784	0.1408	0.1408				10.3	2.9	22.3	23.3					8.8	8.2	7.6	2.2	8.2				5.1	1.3
																										ENSG00000068793	0.3002	0.3002			1.2	38.8	1.9	39.5	3.9		0.4	2.3	7.7				0.7
																										ENSG00000068796	0.1372	0.1372		8.6		10	1.8	18.4	5.3			10.6	4.5	6.8		18.2	5.1	6.1		1.6		3
																										ENSG00000068831	0.1748	0.1748		20.1		22.8			5.2		4			18.8	20.8		3.2	2.3				2.7
																										ENSG00000068878	0.1439	0.1439			0.4	8.9	2.3	12.1	10.4	7.4		11.4	7.7	1	3.5	14.3	7	3.1			3.7	7
																										ENSG00000068885	0.1011	0.1011				43.2										47.4						9.4
																										ENSG00000068903																						100
																										ENSG00000068912	0.2057	0.2057				43.5				1.2		3.5	13.5			25						13.2
																										ENSG00000068971									71.1													28.9
																										ENSG00000068976				12	7.8	31.6	0.3	6.1			5.3					15.4	5.1				2.6
																										ENSG00000069020	0.1287	0.1287				20.8	2.6	4.4	20.8	3.8		3.2	9.5		29.2		0.4					5.2
																										ENSG00000069188						41.3								57	1.7
																										ENSG00000069248	0.2925	0.2925				47.6						4.3	3.9			38.2						6
																										ENSG00000069275	0.2516	0.2516			0.3	44.3						4	9.5			27.7						7	3.8
																										ENSG00000069329						43.8	0.5		17.6													38.2
																										ENSG00000069345	0.1101	0.1101				36.9										40.9			2.3			12.4	7.5
																										ENSG00000069399	0.1158	0.1158		1.6		49.3					1.4	16.2	0.4			18.8		7.8				4.4
																										ENSG00000069424	0.1533	0.1533		0.4	6.3	26.8		9.2	4.1	4.3	9.2	4.4	8.2	3.5		5.9	3.5	3.3				6.4	4.6
																										ENSG00000069493	0.2184	0.2184				41.1										51.9		7
																										ENSG00000069509						30.8										39.1
																										ENSG00000069667	0.2892	0.2892			0.7	14.9	3.1	13	4	2.9		11.5	12.4	5.1		17.7		0.3			0.1	9.9	2
																										ENSG00000069702	0.4776	0.4776		1.3	1.1	8.8		8.3	6.4	5.7	0.2	14.8	13	8	7	13.5		2.2			2.9	1.5	1.9
																										ENSG00000069712							2	11.2	32.7				20.5			11.1	13		9.5
																										ENSG00000069849	0.2404	0.2404			0.7	50.4		12.5	24.1	8.2						4		0
																										ENSG00000069869												28.7				57.6						13.8
																										ENSG00000069943					6.4	24.3	3.3	5.7		16.8			4	11.4		6.5						4.8	6.5
																										ENSG00000069956	0.1696	0.1696				44.8	7.2									35.3						12.6
																										ENSG00000069966	0.1335	0.1335				39.8							1.1	37.8		6.6		9.2	3.7			1.7
																										ENSG00000069974	0.2606	0.2606		10.6	0.2	27.1	2.7	7.3			4.2	5.2		10.3	20.2	7.7	0.6	2.1				2
																										ENSG00000069998	0.4104	0.4104				43.2		30.4		1		4.9			12.3	2						6.3
																										ENSG00000070010
																										ENSG00000070018						17	1		23.1						44.1
																										ENSG00000070047	0.2128	0.2128			5.4	38.7		11.4	4.8		12.9		7.6	4.4	9.7							5.1
																										ENSG00000070061	0.2627	0.2627				44.8						1.9	7.2		6	29.3		6.2	1.3			3.2
																										ENSG00000070081	0.1581	0.1581				28.6	1.9		3	4.3			5.1	1.5		18.4	7.9	1.7				4	8.6
																										ENSG00000070087															100
																										ENSG00000070182
																										ENSG00000070190						39.1			9.2	11.2					20.8		19.7
																										ENSG00000070214
																										ENSG00000070269						85.8
																										ENSG00000070366	0.3002	0.3002				46.2	2.7		1.2	4.4			2.3		20.5	22.6				0.2
																										ENSG00000070367						30.2	9.4	5.1		1.9		9.2	0.6			21				0.5	0.2	22.1
																										ENSG00000070371	0.127	0.127						36.5	6.3			11	14.1	5.9	13.2		3.6	7.8				1.6
																										ENSG00000070404	0.2339	0.2339			2.9	22.4	6.3	35.1	9.1	2.8		8.1	2.7			5.2						5.5
																										ENSG00000070413				2		40			5.2	2.4		6.4	3.1			24.7						16.2
																										ENSG00000070423	0.1318	0.1318				50.8		8.7			0.1		6.3	18.3	11.9		3.3					0.6
																										ENSG00000070444
																										ENSG00000070476						37.7									10.3		36.5			10.3		5.2
																										ENSG00000070495				10.9	23.5		1.7	0.6		3						12.9	1.6	9.6	1.5	3.1		4	17.6
																										ENSG00000070501						30.7	3.4		11.3	13.5		13.9		8.1	6		9.5	3.7
																										ENSG00000070526	0.1321	0.1321			7.2	35.7									35.9		0.6	1.9					13.9
																										ENSG00000070540						49								4	40.9	6.2
																										ENSG00000070610																							100
																										ENSG00000070614						24			1			1.8	7.8	8.7	24.4	27.2			5.2
																										ENSG00000070669						6.9									64.7
																										ENSG00000070718	0.1732	0.1732				45.9									54.1
																										ENSG00000070731	0.2793	0.2793		7.3	1.9	53		11.4				2.6	0.8		3.9	19.2
																										ENSG00000070756	0.2541	0.2541		1.3	3.3	37.2	2.5	10.7		2.2				3	6.3	15.9	4.5	0.7				0	3.5
																										ENSG00000070759						100
																										ENSG00000070761	0.2371	0.2371				50.4							3.2	8.4	20.5	17.5
																										ENSG00000070770	0.202	0.202				49.2									11.1	37.1
																										ENSG00000070785	0.2603	0.2603			3	38.6	1.4	22.6	1.3	0.2	5.9			0.4	2	14.9	3.5				0.3
																										ENSG00000070814	0.304	0.304			3.2	46.1					0.5		6.6	8.4	12.8	11.3	4.2	4.5		2.4
																										ENSG00000070831
																										ENSG00000070882	0.2825	0.2825				32.2		1.2		4		7.4	12	0.9		19.2	3.6	6				6.4
																										ENSG00000070915	0.1037	0.1037				40.4		6.1	3.5	0.9			4	15.5			15			2.3		1
																										ENSG00000070950	0.2067	0.2067				45.2									6.1	45						0.7
																										ENSG00000070961
																										ENSG00000071051				4				10.5	40.5		8.3	24		0.8	3.3	3.5
																										ENSG00000071054	0.2744	0.2744				52.7		22.1	4.1		3.4		10.5		7.1						0.2
																										ENSG00000071073	0.2019	0.2019				26.8		5.2	11			13.1	10.9		1.4	25.2						6.4
																										ENSG00000071082						100
																										ENSG00000071127
																										ENSG00000071189
																										ENSG00000071205	0.2193	0.2193			2	49.1		22.5		1.5		11.4	0.6			11	1.9
																										ENSG00000071242	0.103	0.103				46.8	2.2	14.1		11.1				25.8
																										ENSG00000071243																37.3						62.7
																										ENSG00000071246	0.127	0.127		1.4		38.7		31.1	5.9				5.7	5.8								1.2	1.6
																										ENSG00000071462	0.2761	0.2761			1.2	50.4		8.6					5.7	7.2	16.2	10.6
																										ENSG00000071537	0.1075	0.1075		7.5		13.7	6.9	11.3	1.3			12.3	2.3	10.7	17.1	6.9	0.3					9.7
																										ENSG00000071539
																										ENSG00000071553	0.1155	0.1155						36.1		1.6		11.3	14.3			18		5.3			0.7	12.8
																										ENSG00000071564	0.3212	0.3212				45.7							1.2	43.7				1.1
																										ENSG00000071575	0.1971	0.1971				51.3									24	24.7
																										ENSG00000071626	0.3188	0.3188		0.8		47.7		15.8	1.8		1.2		3.6	4	9.6	13.6		1.3		0.7
																										ENSG00000071655	0.1789	0.1789		1.2	5.5	41		22.4		2.5	3.9		3.2	4.9	9.4					1.5		4.6
																										ENSG00000071794	0.2133	0.2133				45.5	1.6					7.2	6.1			36.9						2.7
																										ENSG00000071859					2	36.3	3.2	42.2						1.4						14.9
																										ENSG00000071889	0.1778	0.1778		8.1		34	0.8	14.6			6.2		0.2	9.8	10.4	0.7		2.1		5.5		3.1
																										ENSG00000071894	0.1864	0.1864		8.1	3.5	38.2	1.4	17.3		3.9	1.9			3.6	14.4		3.8	0.8
																										ENSG00000071967																			44.8				55.2
																										ENSG00000071994	0.2433	0.2433				50.1		3	1.2					1.1	15.8	25.2
																										ENSG00000072042	0.2101	0.2101				53.8		0.3	3.6			8.2	7.1		4	22.9
																										ENSG00000072062	0.1571	0.1571				10.8		16.3	2.2			15.1	11.7			20		3				7.2	1.6
																										ENSG00000072071	0.305	0.305		4.6	3.9	28.4			10.9		8.5	5.1	8.4		23.7	0.5	0.8	5.2
																										ENSG00000072110	0.2431	0.2431				46.8		15.3	5.9	2.1		0.1	5.3		3.5	14.7						6.4
																										ENSG00000072121	0.1238	0.1238				50.2		2.1	2.2					0.7	4.5	38.4		1.3			0.6
																										ENSG00000072134
																										ENSG00000072135	0.1924	0.1924				46.3	2.8	30.4	11.5		0.5					4.5	0.4					3.7
																										ENSG00000072163	0.1033	0.1033		8.1		14.2			1.7	4.7		2.9	6.7	31.8									4.5
																										ENSG00000072195						12.8			3.9						38.5			8.9
																										ENSG00000072210	0.2957	0.2957			3.9	48.5	0.7	28.7	6.1							12
																										ENSG00000072274				3.6	6.7	37.9	3.9			9.5						15.5		3.9				18.9
																										ENSG00000072310
																										ENSG00000072364				4.3			5.5	33.1	3.1			17.6	10.4			8.4				12.6		4.9
																										ENSG00000072401	0.2494	0.2494				29.4	6.3	13.5	11.3		4.6			0.6	14.6			4.4				6.7	4.3
																										ENSG00000072415	0.2125	0.2125				39			6.3			7.5	9.8		6.4	18.3		7.6				5
																										ENSG00000072422																55
																										ENSG00000072501				10.9		45.4						3.2	5.5			29		5.9
																										ENSG00000072506	0.2879	0.2879			3.8	39.2		28.2	0.9	1.2		5.3		3.1	8.6	2.9		2.2		4.6
																										ENSG00000072518	0.2246	0.2246			2.6	40.3	4.1	20.2	5.4	1.3	4.9				10.9	6.3		1.2				2.9
																										ENSG00000072571						23.5	24.8	9.8						9.3								32.6
																										ENSG00000072609
																										ENSG00000072694	0.1124	0.1124				6			16	25.9				10.2	9.8	0.1	6				12.2
																										ENSG00000072736	0.3035	0.3035			3.2	31.9	1.1	3.6	6.1			11	12.6			24					6.4
																										ENSG00000072756	0.124	0.124				30.1	7.1	8.3		0.6		8.2				29.7					1.3	14.6
																										ENSG00000072778	0.154	0.154		10		33.9		42.8				2.2	5.3									5.8
																										ENSG00000072786					2.9				25.1			9.7	25.9				17.6					18.7
																										ENSG00000072803						30.1		5.4	2.4			19.6	7.6			20.1				10.6		4.1
																										ENSG00000072818						9.6								43.4	12.3					31.5		3.3
																										ENSG00000072840				1.5		28	9.8	22.8					11.7			8		1.1			12.3	4.8
																										ENSG00000072849
																										ENSG00000072858	0.3681	0.3681				26.3		14	0.3			10.2	3.4			26.3		10.1	1
																										ENSG00000072864	0.1122	0.1122			2.6	39.4		9.6	18.4				0.5	8.2									11.8
																										ENSG00000072952	0.2537	0.2537				49.4	2.6	16.9						2.7	13.3	9.9			4.9		0.2
																										ENSG00000072954					6			32.3				5.9	14.4				17.2	10.4				13.8
																										ENSG00000072958	0.1431	0.1431			3.6	42.4		28.3		4.6	2.8	2.9		5.2	1.4		0.4	0.2	3.1	0.3		4.8
																										ENSG00000073008	0.2263	0.2263			1.9	32.4	0.5	37.2				4.2				6.4	0.9	0.8				1.4	5.8
																										ENSG00000073009																				31.7		68.3
																										ENSG00000073050	0.17	0.17			0.3	29.5				19.4				35.5								15.3
																										ENSG00000073060	0.2902	0.2902			2.7	35.8	4.6	32.9	0.4	2	4	4		9.1			0.5				4.1
																										ENSG00000073111	0.2991	0.2991			2.2	45.9				1.2			2.8	17	2.8	12.9		4.1			0.8	0.1	2.8
																										ENSG00000073150	0.1493	0.1493				53			19.1							26						2
																										ENSG00000073169						38.5		46.6												14.9
																										ENSG00000073282						27.9	7.4							9.7	24.8								7.1
																										ENSG00000073331	0.2776	0.2776		0.2	4.2	39.4	0.9	19.2	2.7				7.1	5.3	3.6	5.6					2.7	1.2	0.4
																										ENSG00000073350	0.3227	0.3227		4.1	4.4	32.4	0.4				8.3	13.9	22.8			6.1	4.1	3.4
																										ENSG00000073417						41.7				11.2				8.8	16.2	21.6					0.5
																										ENSG00000073464										21.5				78.5
																										ENSG00000073536	0.2286	0.2286				48.6				7.1	9.8			1.7	14.7	13.3
																										ENSG00000073578	0.3238	0.3238			0.2	49.8		7.8					2.4		15.4	19.4				5
																										ENSG00000073584	0.2055	0.2055				49.5						1.4	3.6	9.2		34.1						2.2
																										ENSG00000073605						9								25.3	4.8	50.4		10.5
																										ENSG00000073614								35.6				18.5	6.3			22.4				17.3
																										ENSG00000073711					0.6	40.2	1.4			4.1		14.7	12			27.2
																										ENSG00000073737	0.2182	0.2182			7.2	20.9	1.7	14.9	8.8	2.4	4.9	3.4	5.4	0.5	9.1		0.3	1.4	1.9	8.1		3.3	2.2
																										ENSG00000073756	0.1339	0.1339				44.3		19.1					1.3	1.8	24.6					0.6		8.3
																										ENSG00000073792													14.6		8.7	47.9	23.7					5
																										ENSG00000073803
																										ENSG00000073849	0.3849	0.3849				44.4							5.4	9.4	3.9	24.7		4.9
																										ENSG00000073861	0.4379	0.4379			1.6	18.2		5.9				20.7	17.1	5.5	9.5	12	2.8				3.1
																										ENSG00000073910				1.2	3.4	47.5	0.6	16.8	4.6	1				1.8	15.4	2.8		0.6		0.8		3.5
																										ENSG00000073921	0.2112	0.2112				44.6	4.8	7.3		4.1				9.5	17.5			3.3			2.2	6.6
																										ENSG00000073969						40.6	1.6	10.5	5.8							30.9							10.7
																										ENSG00000074054					0.4		1.4	24.6	9.8		0.3	16.5	2.3			15.2		3.4		13.9			4.7
																										ENSG00000074071	0.1871	0.1871			5.3	34.3	0.5	24.6		5.6				6.9	6.4				1.1			4.2	1.1
																										ENSG00000074201	0.2813	0.2813			1	45.8		22.9			1.3			5	2.3	11.2					0.3		2.5
																										ENSG00000074266	0.181	0.181				35				8.8			0.7		4	35						4.4
																										ENSG00000074319
																										ENSG00000074356
																										ENSG00000074370									39.6		5.5		8.5	27.1			6.4	0.9		4.3		7.7
																										ENSG00000074416										18.2						81.8
																										ENSG00000074527				4.2	1.3	26.3	0.5			3		8.7	22	5.9			14		4.9			9.2
																										ENSG00000074582	0.2058	0.2058		8.5		39.5								9.4	26.2	12.1	4.3
																										ENSG00000074590	0.1953	0.1953					0.7	17.2		1.1	5.7	15.4	11.7		17	18.3	3.5	2.2			6.4	0.7
																										ENSG00000074603
																										ENSG00000074621	0.1131	0.1131		1.2		46.6					2.6	12.4	8.2			22	2.4				4.5
																										ENSG00000074657	0.1614	0.1614				42.8							10.1	26.7		20.4
																										ENSG00000074660						16			13.6			3.8	7.6		17.3	7		20.3	9.3				5.1
																										ENSG00000074695	0.1919	0.1919		0.1		42.5	4.9					14.2				24.4				1		13
																										ENSG00000074696	0.2951	0.2951				47.2							8.3		0.8	38.3						1
																										ENSG00000074706						7		23.6	19.8			2.4				47.3
																										ENSG00000074755				5.7		1.7		23.7	19.9			14.3	3.7			16.8	1.2	8.4			4.7
																										ENSG00000074800	0.2429	0.2429				37.7		35.8	0.1	0.5	0.9	6.6	2.8		2.3			1.2		5.6			0.1
																										ENSG00000074842	0.2808	0.2808			4.1	39.4	1.7	28.1	7	4.8	1.5	1.4			6			1.6			4.4
																										ENSG00000074855	0.1342	0.1342			10.1	35	2.3	25.8		1.5		1.4	5.2		10.6	0		3.3				2.2
																										ENSG00000074935	0.1436	0.1436				46.4									1.6	45.9						6.1
																										ENSG00000074964	0.4313	0.4313			1.8	38.1	0.8	36.7	4.9			5.4					3.6		0.2			4
																										ENSG00000074966	0.1695	0.1695				32.4		2.3	10.9			36.3			7.6	5			5.6
																										ENSG00000075089	0.1482	0.1482				44.1	6.4					0				30.7						18.9
																										ENSG00000075131						40.1	1.7			2.1		7.1			0.4	25.5							5.5
																										ENSG00000075142
																										ENSG00000075151
																										ENSG00000075188	0.2271	0.2271			0.4	36.8		10.5	5.3	1.9	3	2.2	1.2	7.2		19	5.5	4.6				2.4
																										ENSG00000075218														39.2			19.7					41.1
																										ENSG00000075223
																										ENSG00000075234	0.3415	0.3415				25.1	0		0.5		2.8	35.4	15.6		13.3	3.2	2.2				1.9
																										ENSG00000075239	0.2179	0.2179				57.9		11.9	8.5							21.8
																										ENSG00000075240	0.1252	0.1252				50.4		41.9									1.4
																										ENSG00000075275	0.3634		0.3634		5.3	22.4		9.8					6.4	38.2				9.4				1
																										ENSG00000075292							20.8	19.6								38.7						21
																										ENSG00000075303					1.1	8.7	17.3	1.2		8.2	5			7.3		15.3					4	18.2	13.3
																										ENSG00000075336	0.2086	0.2086				52.7		6.8						0.6		39.5		0.3
																										ENSG00000075340	0.289	0.289				30				6				42.7							1.8
																										ENSG00000075391
																										ENSG00000075399	0.1131	0.1131		8.6		57.2										24.8						9.4
																										ENSG00000075407				1.2		45.8						1.8			5.3	35.1					1.7	9.1
																										ENSG00000075413				4.3		36.2							17.3		9.4		12
																										ENSG00000075415	0.3709	0.3709			3.7	39	0.7	24.1	4.5		3.1	2.8			8	6.7				1.5			0.9
																										ENSG00000075420	0.1403	0.1403				38.2	3	24				8		6.7	11.9					8.2
																										ENSG00000075426	0.2422	0.2422		1		45.6		14.4				5.9		3.7	25.4					4
																										ENSG00000075539	0.1199	0.1199				8.5	2.4	27.8	5.8			12.1	7.6			23.1				0.8	2.7	9.1
																										ENSG00000075568				16.5		47.5														36
																										ENSG00000075618	0.172	0.172				35.2		33.8	2.6	2.8	6	0.5				5.8	0.2				4.5	2.8
																										ENSG00000075624	0.1041	0.1041						16.7				19.1	15.5					19.1	13.3			3.7
																										ENSG00000075651
																										ENSG00000075702					1.5	48.6	9.1		16.5						1.5	16.8	1.8	4.2
																										ENSG00000075711	0.1458	0.1458		0.9		41.3						7.7	7.6			29.5					5.7	7.4
																										ENSG00000075785	0.3809	0.3809			7	43.1		16.6					4.9		18.8		0.9	5
																										ENSG00000075790	0.1669	0.1669				33.7	5.1	9.8	4.9	12.1		0.3	3.4			6.4						19.8	4.4
																										ENSG00000075826						31.7	3.2								14.1	9.5	6.6	34.9
																										ENSG00000075856	0.2983	0.2983				45.1							7.8	1.2	16.1	19.7		6.6
																										ENSG00000075884
																										ENSG00000075914	0.2659	0.2659				50.6		28.8	0.6					11.4	3	5.6
																										ENSG00000075945	0.3092	0.3092				43.4		0.3		0.6		19.7	11.7			19.5						4.8
																										ENSG00000075975	0.1974	0.1974		1.2		45.4	1.6			5.2		0.9	2.7			33.2		8.3			0.2	1.2
																										ENSG00000076003	0.2547	0.2547				48.6						9.7	6.9		0.7	34.1
																										ENSG00000076043					1.5	63.4			1.1	3.3			3.9			21.2						5.7
																										ENSG00000076053	0.1187	0.1187				2.2	6.9	21.1		1.1	1.2	0.9	6.7	2.7	1.3	23.2		3.9				17.6	10.8
																										ENSG00000076067					9.3	30.4	4.9	16.3			4	17.1		18
																										ENSG00000076108
																										ENSG00000076201	0.227	0.227		0.3	4.9	36.8	2.2	15.3	6	1.8	5.5		6.7	1.5	9.1		3.9	2.6				3.4
																										ENSG00000076242	0.2795	0.2795				45.8			11				2.2	3		28.1					0.7		9.1
																										ENSG00000076248	0.2577	0.2577				48.2							13.8		3.1	29		2				3.8
																										ENSG00000076258						49.3				2.5		27.2				21
																										ENSG00000076321	0.1054	0.1054				43.6						6.9				43.2			6.1			0.3
																										ENSG00000076351	0.2509	0.2509			3.6	44.4		17.3	18.8			1.7		1.1	4.9	5.2		3			0.2
																										ENSG00000076356						56.3								4.1	11.6	11.5						16.5
																										ENSG00000076382	0.1345	0.1345				55.6	0.2		14.1							19.6		9.9	0.7
																										ENSG00000076513	0.1667	0.1667			6.2	42.1	0.5	26.9		5.9					12.2						1.9	4.3
																										ENSG00000076554	0.1891	0.1891				27.6		13.5				5.8		40.7		4.6						7.8
																										ENSG00000076555	0.2295	0.2295				36.7			5.8				7.9		28.3	14.1		3.8		3.4
																										ENSG00000076604	0.3295	0.3295		5.3		33.6								35.5			8.6	5.4
																										ENSG00000076641				3.6			7.5	37.1		8.4		9.3				22.1						12
																										ENSG00000076650	0.1675	0.1675				42.4	1.7			2.1	2.7		9.9			29.8		11.3
																										ENSG00000076662	0.1375	0.1375				48.3			13.3	4.4		2.9				20.6						10.6
																										ENSG00000076685	0.2452	0.2452			3.7	46.8	1	17.1	2.3	1.7	2	0.8	5.7	8	8.8		2.2
																										ENSG00000076716
																										ENSG00000076770								100
																										ENSG00000076864
																										ENSG00000076924	0.1635	0.1635			1.7	33.4		12.2	4	3.6		5	3	16.4	8.2		4.1			2		6.3
																										ENSG00000076928
																										ENSG00000076944	0.1417	0.1417				13.5		23	0.8			8.1	12.6			26					1.9	14.1
																										ENSG00000076984					0.6	43.7			16.6		39.2
																										ENSG00000077044	0.1322	0.1322				18			27.2			24.2		28.6			0.2	1.8
																										ENSG00000077097	0.1867	0.1867				43.9						7.4	12.5			27.6						8.6
																										ENSG00000077147	0.1273	0.1273				20.2	10.5			3.7		5.6	3.7	14.5		19.2						22.6
																										ENSG00000077150							1.7	27.1				15.9		17.5		24.3			7.5			6.2
																										ENSG00000077152					2	63.5	7.3		12.5							14.8
																										ENSG00000077157	0.1297	0.1297				55.5	3.5	21.5	1.8						17.8
																										ENSG00000077232	0.1238	0.1238				42.3	7.8	9				4.5	0.4	6.3		13.3		1.9	4.5			10.1
																										ENSG00000077235	0.3577	0.3577			3.6	40.8	0.2	8.8	5.2		4	13	12.4			8.4	0.3	3.3	0
																										ENSG00000077238	0.2948	0.2948		7.9	2.1	16	0.1	10.5	1.9		2.8	3.5	5.3	21.5		13	4.5	0.1			5.3	2.5
																										ENSG00000077254						5.3	2	19.3		6.2		5.7	6.7	6.1		22.9					8.4	17.2
																										ENSG00000077312	0.3672	0.3672		6.5	2.7	35.8		19.8		3		3.5		3.9	18.1							0.9	0.2
																										ENSG00000077348	0.2376	0.2376			6.3	38.4		20.1		3.1		4.6		10.3	5.7	3.2	0.4				4.8	3.1
																										ENSG00000077380	0.1824	0.1824		1.1		52.5		17.6	4.4							21.9					0.2	2.3
																										ENSG00000077420	0.3081	0.3081			0.9	51		28.4		0.7	0.7		1.1		12	1.5		0.5		1.3	2
																										ENSG00000077454						33.3			11.4							21.9						33.5
																										ENSG00000077458																			27.4			72.6
																										ENSG00000077463				7.7		20.1		26.5	1.7		1.9	3.3		16.2		12.7	3.8		1.1			5
																										ENSG00000077514
																										ENSG00000077549																		51		49
																										ENSG00000077585	0.1783	0.1783			5.1	34.9			6.7	27.5						12.3		0.2			13.3
																										ENSG00000077684	0.1735	0.1735						24.6	5.9			8.6	21.1		10.9	4.8	2.4		3.3			0.9
																										ENSG00000077713	0.1041	0.1041				46.2	0.7	3	11.3	2.4						24.5	4.8					7.2
																										ENSG00000077721
																										ENSG00000077782					6	16.8	5.3	2.1			7.4	9.5	31.8	10				1.8			9.2
																										ENSG00000077809				1	5.7	36.9	1.5	14.1	11	1.7			1.2	1.2	14.6	2	2.1	1	0.3			5.6
																										ENSG00000077984	0.2001	0.2001				16.9	1.4	16.7				17.4	6.6		19.4	6	5.6				1.8	1.5
																										ENSG00000078043
																										ENSG00000078061						38		14.6		6.1	0.8			9.6	11.2		4.8			14.9
																										ENSG00000078070	0.2908	0.2908		0.5		41.1	0.7	12.1			3.1			8.1	11.6	13.7
																										ENSG00000078081										31.3		10.1	15.5				3.1	20.8	6.2
																										ENSG00000078124
																										ENSG00000078140						33.8			17.3				1.6	10.1		16.1	1					20.2
																										ENSG00000078142																100
																										ENSG00000078177						34.1	2.2	1.4	1.4			7.7	2.4			18.7	4	2.9		4.7		10.7	8.3
																										ENSG00000078237	0.1129	0.1129			0.5	27.1		15.2	15.9			4.8			12.3	8.2	2.1	6.9	7
																										ENSG00000078246	0.252	0.252				46.5						2.6				37.5		12.7				0.7
																										ENSG00000078269						19.6		4.5	15.7		3.7	10			25.9	1.1	0.1	2.5	5.6				11.5
																										ENSG00000078304	0.3437	0.3437				4.9	0.6	17.4	0.9	3.1		13.5	14.7	11	4.2	19.7						10
																										ENSG00000078319	0.1805	0.1805				49.3	4.5			0.8			3.1	5.5	13.9	7.7	4.8	10.5
																										ENSG00000078369
																										ENSG00000078399
																										ENSG00000078401				15.2			39.6		13.7		4.7	26.9
																										ENSG00000078403	0.142	0.142				46	0.6						5.8		3.4	40.8						3.4
																										ENSG00000078487														86.3
																										ENSG00000078589	0.1567	0.1567			0	18		15.8		2.7			7.8	21.7		13.8		5.6			0.8	1.3
																										ENSG00000078596	0.1711	0.1711				39.8			2.9					1.2	8.1	35.4		2.5
																										ENSG00000078618	0.3837	0.3837			4.3	39.9	2.7	12.7	0.6	4.3			5.5	6.7	8.6	4.3	2.1	1.7			2.3	0.1
																										ENSG00000078668	0.2268	0.2268			2.4	54.1		20.7	4.7				1.2			17
																										ENSG00000078674	0.1136	0.1136				30.2		12.2				3.1	6.9			37.2						10.5
																										ENSG00000078687	0.239	0.239		1.9		19.5	1.4	13.4	15.4			9.8	6.9		5.4	22.9
																										ENSG00000078699	0.2332	0.2332				42.2				0.2		7	9.4		4.4	32.6		4.1
																										ENSG00000078747							0.9	18				17.1	11.9	10.8		14.4				9.8		3.8
																										ENSG00000078804						47.4			16.3						15.7						1		10.4
																										ENSG00000078808						36.5	0.8	16.3	2.1	4.6	15.4	4.6	2	1.8			4.9			11.1
																										ENSG00000078902						15.6		26.4		0.2		4.3	14.1			13.9						15.5
																										ENSG00000078967	0.3038	0.3038		7.4	5.6	26.4	0.9	11.1	1.4	1.3	0.9	2.3	3.9	2.9	15.7	2.1	0.5			3.1	3.5	2.4	0.5
																										ENSG00000079134	0.1981	0.1981				50.5									6.4	43
																										ENSG00000079150						49.4										12.1		33.8				4.7
																										ENSG00000079156					8.3	28.9					17.6			45.2
																										ENSG00000079215													24.4		17.9
																										ENSG00000079246						36.4										61.6						2.1
																										ENSG00000079257					4.7	35.3									13.1	25.2		1.4				10.6	9.7
																										ENSG00000079263										31.4				22.1
																										ENSG00000079277	0.3508	0.3508		3.4	5.7	31.2	0.9	16.5	2.2	0.2	0.5	1.8	7.7		6.3	6.2	5.5	0.3	0.3	1.9		0.6	3.1
																										ENSG00000079308								100
																										ENSG00000079313						39			7.6	1.2	14.1			19.1			11.7					7.3
																										ENSG00000079332	0.1444	0.1444				22		15.6					10			43.8					2.4	6.3
																										ENSG00000079335	0.1002	0.1002				37.6							3.2		6.1	35.9						17.2
																										ENSG00000079385	0.224	0.224		2.2	3.3	17	1.8	12.9	10.2	3.2	3.3	3.6	4.3	1.1	7.1	1.2	0.8	0.1	13.3	1.4	9.8	3.5
																										ENSG00000079387	0.1197	0.1197				13.4	7.2	23.3				6.7	2.8			32					4.8	9.9
																										ENSG00000079432
																										ENSG00000079435	0.2042	0.2042		5	5.5	23			10.3	1.4			5	28.7	4.1
																										ENSG00000079459						56.3										22.2					21.6
																										ENSG00000079462	0.1816	0.1816				44.1		10.6							27.5					1.9		3.3
																										ENSG00000079482				0.6		7.4	9.4		12.8	5.8	0.9	32.4	10.8	4.6	12.1			3.3
																										ENSG00000079616	0.2594	0.2594				42.2							6.2		15.2	16.7	11.9	3.8
																										ENSG00000079691	0.1087	0.1087				30.2			3.7				7.8	26.9	4.7	11.7	0
																										ENSG00000079739					5.3	34.8	7	5.2	24.6					7.7				5.5				9.9
																										ENSG00000079785	0.332	0.332				47.9		5.4	4.1						4.3	32.4							1.7
																										ENSG00000079805					20.2	13.9			0.8	0.3	16.9					4.1						15.9
																										ENSG00000079819	0.1625	0.1625				52.5			3.7					38.5							5.3
																										ENSG00000079931						13.9	15						1.3	48.1				5.1
																										ENSG00000079950	0.1257	0.1257			5.4	25.6	4	10.7		5.7		4.8		6.5	24.7		1.2		2.4		0.4	8.7
																										ENSG00000079974	0.192	0.192				46.8									17.4	29.5		1.6
																										ENSG00000079999	0.2475	0.2475			5.5	42.8		21.2	2	1.5	4.5		7.6		1.2	8.8	1.1	0.1		3.8
																										ENSG00000080007						36.9	7.6			1.9	13.3	4	21		1.3			4.6				9.4
																										ENSG00000080189	0.2446	0.2446		10.5		31.9	0.5	16.5		1.8	1.1	2.7		3.8	19.7		4.8			6.7
																										ENSG00000080200						37.7	9	26.9	6.7		9.3											10.4
																										ENSG00000080298	0.1009	0.1009					10.3	25.4	3.6		1	16.5		4.9	1.1	19.7		4.2				13.2
																										ENSG00000080345						8.3	6.1	18.7	5.1	3.8		7.9	7.9			14.5				7.8		11	6.8
																										ENSG00000080371	0.112	0.112		2.3	0.4	20.8	3.6	13.8		0.8	3	9.6	3.2	4.4	17.9	3.6		2.1				14.4
																										ENSG00000080493	0.3593	0.3593		0.9	0.4	7.7		9.9	5.7	2.9		17.1	12.5	7.5	10.7	13.3		2.8	3.2		1.6	3.8
																										ENSG00000080503				3.9		19.1		14.7	15.8			15.8	14.2			15.5		0.9
																										ENSG00000080546	0.2397	0.2397				26			11.8			14.9	8.1	5.7		9.8	4.2	15	4.7
																										ENSG00000080561	0.2024	0.2024				27		6.1	11.7			2.8	14.6		20.3	10.1
																										ENSG00000080573									0.9	5.6			20.2						18.5			9
																										ENSG00000080603	0.1177	0.1177			1.6	33.7			16.2			2.9	4.5	4.1	8.2	16.8	2.3	9.8
																										ENSG00000080608	0.212	0.212				54.5		11.8					0.8		0.9	28.2			0.8			3.1
																										ENSG00000080802						30.8		10.4				9	5			33.7					11.1
																										ENSG00000080815	0.2027	0.2027		5.9	2.4	31.1	4.9		1.4	1.6			7.2	2.8	25.4	2.6		4.5				2.4
																										ENSG00000080819	0.1997	0.1997				42.9	2.4	11.6							6.6	36.5
																										ENSG00000080822	0.1546	0.1546				32.3	1.3									43						23.4
																										ENSG00000080823					19.5		24.6					2.5	36.2					17.2
																										ENSG00000080824	0.1906	0.1906		4.3		51.1							5.5			39
																										ENSG00000080839	0.2525	0.2525				47.6							9.7			36.4						6.2
																										ENSG00000080845
																										ENSG00000080854						16.1	9.3		5.4	10.6					58.7
																										ENSG00000080947						43.4				2.4	1.1		15.2		3	27.5	7.5
																										ENSG00000080986
																										ENSG00000081014				5.1		42.6	1			0.1						29.2		7.3				14.8
																										ENSG00000081019	0.1446	0.1446					6	38	0.5			8.5	7.2			23.2					1.9	14.7
																										ENSG00000081026						52.9									47.1
																										ENSG00000081052	0.1028		0.1028			5.6	5.1	16.7				1.8		27.9			7.5	14.8
																										ENSG00000081059	0.2343	0.2343				45.8									45
																										ENSG00000081087
																										ENSG00000081148
																										ENSG00000081154						33.7										38.6						27.8
																										ENSG00000081177	0.174	0.174				39.5						8			4.1	35.8	4	5.3			3.2
																										ENSG00000081181						2.8	4			1.7	22.5			8.3		18.9	29.8	12
																										ENSG00000081189	0.1836	0.1836			1.8	27.3	6	3.5		3.4				36.6	12.2						0.8	8.3
																										ENSG00000081237
																										ENSG00000081307	0.2216	0.2216				45.2						10.6	0.9			36.2						7.1
																										ENSG00000081320
																										ENSG00000081377					3.8	3.6	2.6	24	6.4	1.7		15.7	14.4	5.1				11.3	3.6	7.8
																										ENSG00000081386	0.2139	0.2139				43.9		0.4				11.6	6.6			31.9			3.8			1.7
																										ENSG00000081665						37.1										49.7		2.2
																										ENSG00000081692	0.2429	0.2429			1.4	43.7		17.7		0.9		3.7	2.1	4.9	12.4	8.5				3.8		1.1
																										ENSG00000081721	0.2639	0.2639				48.6	0.6	16.8		3.2		3	4		7.3	16.5
																										ENSG00000081760	0.2886	0.2886				38.6		1.2		5.3	1.4	1.3			15.5	18.4	0.7	6.9		10.7
																										ENSG00000081791	0.2782	0.2782		0.5	6.1	34.5	1.4	26.7	1.4		0.4	3.6		2.7		8		3.9			0.6	2.8	2.5
																										ENSG00000081870	0.1103	0.1103				42				10.2						25.4				10.4		3.7	8.4
																										ENSG00000081913	0.1164	0.1164				48.6		24.9							7.8			0.8	3.7				12.9
																										ENSG00000081985	0.2557	0.2557			0.6	8.3	0.9	11.3	1.7	2.2	11.6	9.6	1.4	2.6	4.9	8.2	5.3	8	1.6		6.5		3.3
																										ENSG00000082014	0.2683	0.2683			1.6			36.2	6.3		0.9	17.5	16.4			11.3		0.6				3	6.2
																										ENSG00000082068	0.3536	0.3536			0.6	47.4		18.1		3.9				5.2	7.7	17.2
																										ENSG00000082074						42.8	7	31.2						7.6		3.3				6.6		1.5
																										ENSG00000082146								100
																										ENSG00000082153	0.1082	0.1082				19.5	1.7	1.1		7		2.9	4.5	16.5		22.8						24.1
																										ENSG00000082196						37.3							24.3		7.5	20.1	10.7
																										ENSG00000082212
																										ENSG00000082213						42.2	1.9					1.4				45.6						8.8
																										ENSG00000082258																59.1			33.4			7.5
																										ENSG00000082269						33.9	5						6.8			24.8					9.8	14	5.6
																										ENSG00000082293	0.3023		0.3023		9	12.8		7.1	2.9					48.5	7.8			0.9			5.4
																										ENSG00000082397	0.1424	0.1424				19.2		7	34.4				3.9	3.4	6.8			9.4					8
																										ENSG00000082438	0.297		0.297		4.3	23.7		8.9	0.2					42.3			0.9	0.3	0.2			1.7
																										ENSG00000082458	0.3354	0.3354				39.4			0.2			4.7	18			34.1
																										ENSG00000082512	0.2168	0.2168				40.5						1.7	0.1	19.8		32.1		5			0.9
																										ENSG00000082515					3.2	45.2		28													12.6
																										ENSG00000082516	0.3117	0.3117		2.4		50.4	2.7						4.9		3.6	31.2		4.8
																										ENSG00000082641						54.3	2.3	31.5	10.1			1.8
																										ENSG00000082701	0.1291	0.1291		3.5	0.4	22	4.5	19.7	4.8			14.3	1.8	7	10.8	3.5				7.6
																										ENSG00000082781																100
																										ENSG00000082805				9.9		52.7	3.1									29.8						4.6
																										ENSG00000082898						33	5.2	1.2		9.9						33					3	14.6
																										ENSG00000082996	0.2579	0.2579			6.3	37.2	0.9	15.2	1.4	4			3.7	0.6	19.2		2.8	3.1				5.7
																										ENSG00000083093	0.1981	0.1981				48.9						6.7			4.8	37.6					0.5	1.4
																										ENSG00000083097	0.1328	0.1328				35						8.6	9.1		2.2	30.2		1			14
																										ENSG00000083099	0.159	0.159				47.1	4.8			4.1						31.8		0				12.2
																										ENSG00000083123	0.178	0.178				43.1									5.4	37.1			1.7			2.1
																										ENSG00000083168	0.1026	0.1026		1.6		14.9	1	31.4	12.6			16.5	6.2			6.6		1.1		8.2
																										ENSG00000083223	0.1888	0.1888		2.1	2.2	43.8		27.7		1.6		2.1		11.1	6.2						1.2	2
																										ENSG00000083290	0.1684	0.1684				48.6		5.7	16.1	8.7						20.8						0.2
																										ENSG00000083312				0.8			9	19.4	6.1	3.4		15.5	4.9	9.6		12.4				1.8		17
																										ENSG00000083444						23.2		17.5							36.5							22.8
																										ENSG00000083454	0.375	0.375		5	1.5	19.5	1				0.4		2.4	45.2	13.4		0.7				2.2
																										ENSG00000083457	0.2044	0.2044				42.7		35.4		4.8			4.7			3.5					0.3
																										ENSG00000083520	0.1065	0.1065				39.8	2.3					2.1	0.8			37.4					2.9	14.8
																										ENSG00000083535	0.1706	0.1706			3.7	32.8	7	3.9				10.1	13.7			16	0.6		0.9			11.3
																										ENSG00000083544	0.2938	0.2938		3.9		45.8							6	2.1		35.2		1.6				2.4	2.9
																										ENSG00000083635	0.252	0.252				43.7			0.3			5.2	0.2			39.1		3.3
																										ENSG00000083642					4.9		5.2	23.4			2.9	13.1	9.2	3.2		17.4					2	18.7
																										ENSG00000083720	0.2743	0.2743				45.8							8.2		7	38.9
																										ENSG00000083750	0.1378	0.1378				48.8				4					16.6	30.5
																										ENSG00000083799						7.6		24							41.7	12.7						14
																										ENSG00000083807						28	2.5	5.6		4.9		8.7	5.5	11	13.5		5.9			12.6	1.6
																										ENSG00000083812	0.2113	0.2113			4	27.4			10.4	0.2			7.4		19.9	8	0.9			5.9
																										ENSG00000083814	0.1829	0.1829				30.3								19.9	24.6	8.3
																										ENSG00000083817	0.2425	0.2425				41.5								5.7	15.1	24.5
																										ENSG00000083828
																										ENSG00000083838	0.2735	0.2735				29.8			7.9		0.9			1.9	22.3		17.4	3.9		2.5		6.4	0.5
																										ENSG00000083844				5.6		26		4.9				17.5	13.1			10.9			22
																										ENSG00000083845	0.2518	0.2518		2.3		38.9			0.8	6.8				14.6	23.1					1.9
																										ENSG00000083896								5.6					40			54.4
																										ENSG00000083937
																										ENSG00000084070	0.1921	0.1921			0.3	51.3		12.1	8						19.6	8.7
																										ENSG00000084072	0.3263	0.3263				46.7		5.6						4.2	18.4	16.6	0.2
																										ENSG00000084073
																										ENSG00000084090	0.3967	0.3967				50.2		15.8	6				1.9	2.2		20.6					1.2	2.1
																										ENSG00000084092	0.3073	0.3073				52.3		11.5						4.7	15.6	15.9
																										ENSG00000084093	0.1192	0.1192				10.4	5.7	21.3	3.8	0.6	4.7	7.8	9.5			21.1			2			13.1
																										ENSG00000084110	0.3552	0.3552			1.5	49.3		19.2			0.6		5.7	1.3	13.2	3.4
																										ENSG00000084112								28	12.2			48.7	4.5							6.6
																										ENSG00000084207	0.2851	0.2851			3.3	44.6		42.3				4						1.4		4.4
																										ENSG00000084234	0.2127	0.2127						42.4			5.8	4.8	15.7		17.7	3.9	4.5	5.2
																										ENSG00000084444	0.1191	0.1191				33	0.7			11.9				20.7		5.3						4.1	6.1
																										ENSG00000084463	0.3135	0.3135				50.5							8.2	1	9.4	30.7		0.2
																										ENSG00000084623	0.354	0.354			2	47.3		23.6		2.4	1.6			4.9	7.6	8.9				1.7
																										ENSG00000084652	0.3389	0.3389				53.1								5.7	7	34.2
																										ENSG00000084676	0.119	0.119				41.1		26.6	4.2			7.2	0.5	7.4	5.3					7.6
																										ENSG00000084693	0.1521	0.1521				44.4						2.5		1.7	31.9		7.1	1.6		10.8
																										ENSG00000084731	0.213	0.213				43.9		21.1	11.5		2.2	4.3			3.3	5.2		0.9	1.9			5.7
																										ENSG00000084733
																										ENSG00000084754	0.3275	0.3275			5.3	39.8		29.5			1.1	5.8			9.8	7.1	0.8			0.8
																										ENSG00000084764						56.4			16.4							27.1
																										ENSG00000084774	0.3096	0.3096				47.7			4.1					1.4	24	13.1	1.7	2.9
																										ENSG00000085063	0.1356	0.1356			5.8	31.6		34.6	8.5		3.7
																										ENSG00000085117	0.1475	0.1475				31	3.1		14.7			6		11.2		22.4	4.5	3.1			3.8
																										ENSG00000085185						50.3		8.9	32.7													8.2
																										ENSG00000085224							3.6	27.7	7.7			12.5	5.1			24				5.5		13.9
																										ENSG00000085231	0.2105	0.2105				46.7	4.1	14.5	4.5							19.2	0.3						3.6
																										ENSG00000085265	0.3437	0.3437		1.6	3.3	11.2		31.5	7.8	0.1		13.9	10.2			6.4		6.6			5	2.4
																										ENSG00000085274	0.1015	0.1015				15.2	4.2	17.8		3.2		14.7	3.7	1.2	3.3	20.5		1.5	3.7			10.9
																										ENSG00000085365	0.1063	0.1063				14.6	12.8	9		3.3		13.3	3.7	11.7		9.7						21.9
																										ENSG00000085377	0.3752	0.3752				52		10.8	3.2				1.5			32.5
																										ENSG00000085382	0.1512	0.1512				35.1	6.7	3.6				0.3				42						12.2
																										ENSG00000085415	0.2162	0.2162				57.2								15.5		22.9						4.4
																										ENSG00000085433												69.5				30.5
																										ENSG00000085449
																										ENSG00000085465						33.6				8.9				21.1	5	24.7	6.7
																										ENSG00000085491				1.3		44.7														52.9		1.1
																										ENSG00000085511	0.2785	0.2785				46.5							9.4		18.1	23.8		1.2				1.1
																										ENSG00000085514	0.2361	0.2361				41.2		0	3.4			8.2	9.2		11	14.5		2				10.3
																										ENSG00000085563	0.3541	0.3541				9.5		18.2	5.9			21.9	16.6	0.4		8.1		5.5	6.5
																										ENSG00000085644
																										ENSG00000085662	0.3555	0.3555				43.9		6.1		3.3			5.8		14.9	13.9		3.4		1.3
																										ENSG00000085719						3.1	13.1	22				4	9	5.4		22.4				5	0.6	15.3
																										ENSG00000085721	0.2132	0.2132				46.1						4.7	2.9			46.3
																										ENSG00000085733																100
																										ENSG00000085760	0.1939	0.1939				44.3			5.7					4.5	4.6	27.7							0.7
																										ENSG00000085788	0.2448	0.2448				43.8						9.3	10.9	1.4	1.7	27.8		0.5				4.5
																										ENSG00000085831																		100
																										ENSG00000085832	0.1042	0.1042		1.3		10.4	4.8	11.7		9.4		4.8	8.6	6.7	7.7	21.4						13.1
																										ENSG00000085840						95.5	4.5
																										ENSG00000085871	0.2117	0.2117			1	27.5		43.1	3.3			3.8	8			9.5		3.8
																										ENSG00000085872	0.1059	0.1059				38.6			15.4	4.3	2.1		5.4	29.3								5
																										ENSG00000085978	0.3133	0.3133				34.5		3.7				2.4	5.2			38.9	2.3	2					2.9
																										ENSG00000085982	0.2324	0.2324			2.7	44.5	2.4	22.9		3.7					8.8	15
																										ENSG00000085998	0.3469	0.3469				46.3							0.5	6.2	11.2	22.4	6.8	3.3
																										ENSG00000085999						100
																										ENSG00000086015						47.5	7.2	5.4	0.3		2	8.7				15.2	5.6				8.2
																										ENSG00000086061	0.1149	0.1149			8.3			2.5	22.7			4.2	1.3		15.6	17.4	12.8	8.3					1.1
																										ENSG00000086062
																										ENSG00000086065	0.1941	0.1941			4.7	21.3			18.4	4.5	2.4	0.9	13.7	2.4	21.3		3.6	6.8
																										ENSG00000086102	0.2626	0.2626				49.3							1.2	6.6	8.9	29.9		4.2
																										ENSG00000086189	0.2233	0.2233				45.2							3.5		13.3	24.9						2.4
																										ENSG00000086200	0.203	0.203		1.3	3.5	34.9	4.1		4.1			8.1	6.5			20.1			3.8			8.6
																										ENSG00000086232								88.7						11.3
																										ENSG00000086288	0.1453	0.1453		9.4	1.4	25.8	1.1		5.2		2.8		6	3.5	9.5		8.2	5			9.8	1.5	6.8
																										ENSG00000086289					9.4	11.5	11.3	1.3		10.8	7.6	4	9.1	17.7	2.6		3.5	0.3			10.9
																										ENSG00000086300	0.213	0.213		3.3	4.2	30.8	3.4	14.9	3	2.7		1.7	1.8	4.3	20.4	2.2	1.3	0.5		0.9		4.6
																										ENSG00000086475	0.2939	0.2939				52.6		3.2					1		16.3	27		0
																										ENSG00000086504																				100
																										ENSG00000086506																100
																										ENSG00000086544
																										ENSG00000086548					3.5	17.2	37		2					8.3			26.5					5.5
																										ENSG00000086589																100
																										ENSG00000086598						27.8	5.6					0.5	9.6	2.4		26.2		1.4				26.5
																										ENSG00000086619							12.8	14.4		4.5		1.6	21.4			18.3			12.5			14.4
																										ENSG00000086666
																										ENSG00000086712	0.1926	0.1926				42.8										50.9						6.3
																										ENSG00000086730	0.2344	0.2344		7.1		49.6						6.2	12.9		5.9	16.4						1.9
																										ENSG00000086758	0.1563	0.1563		5.2		42.9			8.6			4.6	3.7		4.6	24.8		5.6
																										ENSG00000086827	0.1692	0.1692		10.1		52										34.8					2.3	0.8
																										ENSG00000086848	0.2287	0.2287				50.6						0.9	4.3		14.5	26.9						2.8
																										ENSG00000087008	0.2722	0.2722			1.9	48.4		27.4	0					14.6	0.1	3.4	4.2
																										ENSG00000087053	0.2924	0.2924				37.1	0.3	0.7		1.5		14.9	7.9	3.3		27.2		0.4			1.9	4.8
																										ENSG00000087074	0.125	0.125				55.6									5.7	38.7
																										ENSG00000087077	0.1083	0.1083		11.7			0.4	24.3		4.8	9.4	7.2	18.5	4.2			2.5	8.4	8.6
																										ENSG00000087086								22.7					5.1			49.5						22.7
																										ENSG00000087087	0.3288	0.3288		5.9	3.8	33.2		16.8	0		0.5	4.6	3.7	4	16.2	4.7		0.6			1.1	4.9
																										ENSG00000087088	0.2121	0.2121				37.3		39.1	3.4		0	5.9						1.4		12.3		0.5
																										ENSG00000087095						24.5	8.9	12.3		4.7		11.2	6.6	1.5		15.4	0.2			5.7		8.9
																										ENSG00000087111						47.2		32.4	3.1	4.7				1.6		0.5	1			9.5
																										ENSG00000087152																				100
																										ENSG00000087157	0.2718	0.2718		1.7	3.3	37.9	3	23.5		2.3	1.6		5.5	1.9		2.7							1.3
																										ENSG00000087191	0.2526	0.2526				43.8		21.8	0.4			1.4			17.3	6.3				3.8		1.8
																										ENSG00000087206	0.2538	0.2538			10.2	34.4	1.9	23.1			2.1	0.2	4.3	0.5	5.6	6.1	1.3	5.3			1.1	0.6	1.2
																										ENSG00000087237									30.9				18.8		12.5	28.5
																										ENSG00000087253	0.281	0.281			6.4	36.1	4.5	20.2	6.4	0.5	0		6.1	3	13.3	0.3		1			2.3
																										ENSG00000087258	0.1926	0.1926			4.1	8		15.7	5.6			1.6	28	0.7		8.9	5.2		0.8		1.7
																										ENSG00000087263	0.266	0.266				51.9							5.4		9.9	32.9
																										ENSG00000087266				1.9	1.3	1.9	4.3	13.5	0.9	8	6.9		0.1		5.6	14.4	2.3				5.4	12.2	2.2
																										ENSG00000087269	0.3672	0.3672				52.3		4.2					1.1	2.6	17.3	20.6		2
																										ENSG00000087274	0.2747	0.2747				25.6	1.7	12.6	9.8			10.8	6.7	16.4		8.7	4.4	3.3
																										ENSG00000087299	0.1405	0.1405		11.3	11.9	29.4	3.9	5.9	0.4	1.5	3.1	4				28.7
																										ENSG00000087301						34.4					5.5	8.5	5.3			6.6			6.2			19.5
																										ENSG00000087302	0.2169	0.2169				40.5		23.3	1.3		3.5	3.2			5.4	7.1	1				1.6	1.9	1.5
																										ENSG00000087338	0.1491	0.1491			1.2	10.3	5.7	17.6	3.6		0.6	9.8	6.6	2.3	13	10.8	2.3	0.9	1.7			13.5
																										ENSG00000087365	0.1364	0.1364			0.8	33.2				11.3				10	16.3		10.8			16.3		1.2
																										ENSG00000087448	0.1778	0.1778				43.2	3.1					7.7				37.3			5.9			2.8
																										ENSG00000087460						15.6		0										2.4			13.7	16.6
																										ENSG00000087470	0.1505	0.1505				48.5	3.2			5.6						28						14.8
																										ENSG00000087502
																										ENSG00000087586					32.9	31.8						27.4									7.9
																										ENSG00000087589						59.1		11.4	29.5
																										ENSG00000087884	0.1392	0.1392				38.2		45.7				0.2	9					6.9
																										ENSG00000087903	0.1436	0.1436				46.1		1.5	2.8				6.3	0.2		37.7	1.9						3.5
																										ENSG00000087995	0.2011	0.2011				42.7							10.2	2.2	3	29.3			2.8
																										ENSG00000088035
																										ENSG00000088038						40.5			31.5	2										6		19.9
																										ENSG00000088053																53.1
																										ENSG00000088179	0.4017	0.4017			0.8	12.3	0.9	12.3	3.4	0.9	1.3	14.9	11.5	9.8	1.6	13.6		3.6		0.1	2.8	4.9	2.9
																										ENSG00000088205	0.2404	0.2404		3.3		50.1							1.4		3	39.3					1.4
																										ENSG00000088247	0.2723	0.2723			6.7	35.3	2.7	9.1		4.6	1.3	5.1	6.1	9.5	1.6	5	0.7	1.1	2.1				2.9
																										ENSG00000088256	0.269	0.269			4.2	25.2	2.4	12.5	5.8	5.7	1	5.1	7	5.2	0.6	13.1	6.6	0.6			1.6	3.6
																										ENSG00000088280				10.7		18.2		2.8	4.3	8	5.8	11.2	7.2		25.7		1.9	3.4				0.9
																										ENSG00000088298					0.8		0.9	20.3	26			32.1						6.6		9		4.4
																										ENSG00000088305				5.2		29.2				6.1		9.5			20.5			29.6
																										ENSG00000088325						99.3							0.7
																										ENSG00000088356	0.2782	0.2782		6.3	2	38.2	1.2	13.1		0.5		1.3	9.2		17.9	6.8	0.2			3.2
																										ENSG00000088387	0.1947	0.1947				35.4	3.1	1.4	9.7				1.8		22.3	21.2		5.2
																										ENSG00000088448	0.1098	0.1098				30.4							10.6	3.6		48.9						6.4
																										ENSG00000088451	0.1213	0.1213			1.5	50.2										37.6						10.7
																										ENSG00000088538	0.1149	0.1149				33.9	7.8						8.6		29.5	0.5
																										ENSG00000088543	0.2405	0.2405				42.1	2.3						12.8		24.7	3.6	9.7
																										ENSG00000088682	0.2749	0.2749		4.5	1.6	33.8		19.8	2.6	1.7	1.4	6.8		4.9	5.4	7.4				3.4			0.7
																										ENSG00000088726																100
																										ENSG00000088727					9.3	49.5	10.4										30.8
																										ENSG00000088766	0.1896	0.1896				47.4	1.7	24.5								16.6						9.8
																										ENSG00000088808	0.2999	0.2999				27.5		9.4	4.5			4.2	9.2	1.6	12.9	12.9	3.1	7.3
																										ENSG00000088812	0.2028	0.2028		7.6	6.9	41.9	1.2	21.6			0.9	1.5	6.7	0.2		3.9	0.7	2.1		1.3			3.5
																										ENSG00000088826																79.2
																										ENSG00000088827	0.2742		0.2742			12.1		19	15.7	3.1		9.8	12.6			0.5		8.4	3.2			4
																										ENSG00000088832	0.2286	0.2286				11		7.9	21.1			21.5	18.3		5		6.5	8.4	0.3
																										ENSG00000088833	0.2218	0.2218		0.3	6.4	39.4	3.5			4.4		10.5	6.3		4.7	22.1	2.4
																										ENSG00000088854	0.2151	0.2151		1.2	2.2	46.1		29					5.9			12.4		0.2			3.1
																										ENSG00000088876	0.2286	0.2286				45.5								6.3	21	24.2		3
																										ENSG00000088881	0.2267	0.2267		5.6	9.8	6.3	0.6	4.5	7.3	1.9	0.2	8.8	10.1	2.4	5	1	2.9	4.4		5.1	7.5	3.4	5.4
																										ENSG00000088888
																										ENSG00000088899	0.2503	0.2503		10.8	2.2	19		7	2.7		3.4	10.6		4.7	24.7	0.2	3.8
																										ENSG00000088930
																										ENSG00000088970													27.4				36.9				0.4
																										ENSG00000088986	0.1842	0.1842			1.5	61.9		26.2	8.1								2.3
																										ENSG00000088992
																										ENSG00000089006	0.2622	0.2622				42.3		3.3	11.8	3.9			2.6	4.5		24.7					5.1	1.8
																										ENSG00000089009	0.167	0.167				56.1		16		4.8				10.2	11.8						1.1
																										ENSG00000089012	0.2908	0.2908		0.3		35.7	0.9		0.1			13.9			31.3	12.9				4.8
																										ENSG00000089022	0.2658	0.2658				47.1	5.2	9.6	2			1.8	7.4		9.2	14.4		3.3
																										ENSG00000089041						63.7				36.3
																										ENSG00000089048	0.1226	0.1226		4.6		47.5						6.5				31.4							7.2
																										ENSG00000089050	0.1743	0.1743				43.2	0.3					4	17.2			28.9		0.3				6.2
																										ENSG00000089053	0.2383	0.2383				53		0.6	4.5						18	22.1		1.7
																										ENSG00000089057																86.1	13.9
																										ENSG00000089060	0.1931	0.1931		5.3		11.1	0.8	12.4		2.9	3	7.5	3.8	2.8	19.8	12.6	2	2.7			0.8	9.5
																										ENSG00000089063	0.1799	0.1799				49.5	5								4.4	35.9						5.2
																										ENSG00000089091						22.3		10.4				6.5				20	18.9	22
																										ENSG00000089094	0.3622	0.3622				46.5		4.1					4.9	10.2	2.6	22.6		2.7			0.1
																										ENSG00000089123	0.2293	0.2293				43.8						4.7	11.3	2.4	5.5	21.6
																										ENSG00000089127	0.2329	0.2329				2			42.9	6.7		18.1	19.5				0.8	7.4	0.6			2
																										ENSG00000089154	0.3456	0.3456			2.2	42.7	1.9	6.4	4.9				3.4	1.8	14.4	16.3		6
																										ENSG00000089157	0.2529	0.2529				42.7				5.2				11.2	27.4					1.2	2.1
																										ENSG00000089159	0.2152	0.2152				46.7		15.1		3.9				2.5	13.6	7.7	3.8					6.6
																										ENSG00000089163
																										ENSG00000089169
																										ENSG00000089177						38.5						6.6		6.7	34.4	13.8
																										ENSG00000089195	0.2448	0.2448				51.8		14.1	0.3					2.2	5.9	22
																										ENSG00000089220	0.3319	0.3319				47.8				2.3			2.9	1.7	25.5	9.8				0.6
																										ENSG00000089234								43.9					22.5			33.6
																										ENSG00000089248	0.2912	0.2912			0.3	38.5		25.7		4		3.1		7.7	8.2			0.6		4.9
																										ENSG00000089280					4.3								6.7		28.9		40.2					20
																										ENSG00000089289	0.2009	0.2009			0.8	30.1		16.8	3.7	4.7	2.7	6.2	3.1	5.5	3.3	8.9					3.1
																										ENSG00000089327	0.2264	0.2264				35	0.3	19.1		4.2		7.4		1	19.5			1.9		5.9		0.4
																										ENSG00000089335						40.6	5.7								9.4	33.5			10.7
																										ENSG00000089351	0.194	0.194			1.4	36.8		11.1	0.6	4	0.6	2.1	8.2	7.5		16.8					2.7	8.2
																										ENSG00000089486	0.2113	0.2113			0.3	39.1	4.9	7.3	1.9		5.5	2.5	11.1	4.3	5.3		2.6	3.1		5.1			2.9
																										ENSG00000089505					22.1	77.9
																										ENSG00000089597	0.3088	0.3088			2.5	41.4	0.7	15.7		4.3	1.4		0.9	0.6	9.9	9.4		4.8				2	1.2
																										ENSG00000089639	0.1913	0.1913				46.4			5.6						2.8	34.9						10.3
																										ENSG00000089682				6	0.2	33.6	7.6		1.7			15.8	4.3			1.8		8.9	7	6	7.1
																										ENSG00000089685						63.5	36.5
																										ENSG00000089692	0.23	0.23			1.8	24.5	1.6			3.5			17.3	15.1		23.7		5.5					2.2
																										ENSG00000089693				11.5		40.9				4		11				16.3				13.9		2.4
																										ENSG00000089723
																										ENSG00000089737	0.3682	0.3682				46.9							2.1		23.8	22.1
																										ENSG00000089775	0.2064	0.2064				44.3									18	37		0.7
																										ENSG00000089818
																										ENSG00000089820
																										ENSG00000089876						100
																										ENSG00000089902	0.1193	0.1193		4.9		38.8	5.1	3.5			1.3		2	11.1	20.7		7.4			3.1		2.1
																										ENSG00000089916
																										ENSG00000090006	0.285	0.285		4.7	5.9	28.7	0	13.8	7.7	1.8	1.6	1.7	13	0.9	10.5	0.4	3.1	0.6	3.1		2.7
																										ENSG00000090013
																										ENSG00000090020						18	15.9		1.6			20.4				23.6						14.7
																										ENSG00000090054							16.2									83.8
																										ENSG00000090060
																										ENSG00000090061								38.7				7	19.8			17.5					17
																										ENSG00000090097	0.2305	0.2305				43.7							11.9		11.8	19.4	9.9			3.4
																										ENSG00000090104					6.3	45.9	5.5			6.1				3.4		30						2.8
																										ENSG00000090238				4.3		51.6										34.2						9.9
																										ENSG00000090263						69.7		15.2		0.9			1	6.6	5.9						0.7
																										ENSG00000090266	0.2476	0.2476			0.1	42.5	3.1	27					3.5		6.6						3.6	1.5
																										ENSG00000090273	0.1961	0.1961				36.9	6.5	23.2		0.5		4.9	0.9	5.8	12.7			1.3		4.6		2.8
																										ENSG00000090316				6.2		57	1.1		3.6				8.8		4	19.4
																										ENSG00000090339						18			20.9			39.7	5.4				7.1		0.9			8
																										ENSG00000090372				7.8				26.2		2.8	11.5	6.5				21				11.4		12.8
																										ENSG00000090376	0.1739	0.1739			0.1	36.2	1.9						12.4		24.7	3.6		2.4		4.5			0.1
																										ENSG00000090382	0.1703	0.1703		4.6	3.1	17		30.5	2.5	7	8.3	4	4.4	3.6			4				3.2		3.9
																										ENSG00000090432					8.5	36			9.3	8.1			4.5	14		17.2				2.3
																										ENSG00000090447	0.3606	0.3606		8.5	1	36.1		13.5	3.8	0.5	0.2	2.7	3.9	7.1	19.7	0.5	2.4		0.1
																										ENSG00000090470	0.271	0.271				46.7							6.9	5.8	6.4	25.8		2.3			0.6
																										ENSG00000090487	0.1742	0.1742		1.2	3.8	2.6	2.7	35.3	3.7		4.1	5.6	7.8		10.7		7.1	12.7			0.9	2
																										ENSG00000090520	0.1632	0.1632				47.5	2	28.4	14.2				1.5			4.5						1.8
																										ENSG00000090530	0.2293	0.2293				32.9	6.2	9.7	6.5		2.2					12.6	4.4	3			3.9	2.1
																										ENSG00000090554	0.2348	0.2348				48.4									43.1					8.5
																										ENSG00000090565	0.2615	0.2615				44.2			1.4		0.7		12.6	2.4	15.6	9.6	7.2	6.1				0.3
																										ENSG00000090581	0.1484	0.1484			5.2	37.5		34.1	1.2			4		5.5			0.9			7.3		4.3
																										ENSG00000090612	0.1747	0.1747				44.1	4								8.5	32.7						3.8
																										ENSG00000090615	0.2175	0.2175				51.1							4	9.8	13.6	21.4
																										ENSG00000090621	0.4058	0.4058			5	34.1		12.1		0.5		4.5		2.3	16.4	7.4	2.4	1.6		1.6			0.7
																										ENSG00000090659	0.1259	0.1259			10.2	44.8		25.1	11.8		2.2								1.1			4.8
																										ENSG00000090661
																										ENSG00000090674								28		8.1		12.2	28.1			13						10.6
																										ENSG00000090686																100
																										ENSG00000090776	0.2484	0.2484			4.7	44.9		21.3	2				0.5	5	4.7			2.1				2.9	1.2
																										ENSG00000090857				7.8		58.8						5.3				5.2	12.9	10.1
																										ENSG00000090861	0.3151	0.3151				48		8.2				0.8			21.3	10.7		4.5		6.5
																										ENSG00000090863				9.3		51.8			3.4			10.4				9.6	0.7	14.8
																										ENSG00000090889						74.7							1.9										23.4
																										ENSG00000090905	0.1175	0.1175		1.7		47.5						2.5	1.4		2.8	43.7						0.5
																										ENSG00000090920	0.1063	0.1063				26.4		0.6	15.9						11.8	9.1	14.2			6		4	4.3
																										ENSG00000090924	0.2312	0.2312				47.9							7.5		14.1	30.4
																										ENSG00000090971					6.4	33.7							10.3	39.5							10.2
																										ENSG00000090975	0.1692	0.1692		3.2	2.5	23.2		2.1	8		10.5	12.9			14.4	7.2	2.8	9.5			3.6
																										ENSG00000090989
																										ENSG00000091009				1.1		10	7.6	23.9	6.6		0	14.6	4.7			18.5					3.2	9.7
																										ENSG00000091039
																										ENSG00000091073						2.2		16.2		4.8	7.2			11		22.9	12.2					23.6
																										ENSG00000091106	0.3669	0.3669			3.7	24.6			12.9		1.1	5.6	16.3		14.2	6.8	0	5.5					2.6
																										ENSG00000091127					1.9	54.1					2.8					18.7			1			9.2	12.3
																										ENSG00000091129	0.1834		0.1834		3.7	27.3		0.5	11.6	1.8			4		7.2	18.1		4.9	4.4
																										ENSG00000091140						26.8	0.1	11.7	9.2	2.5	9.2			0.7		14.2	1.5					14.2	8.2
																										ENSG00000091157	0.1296	0.1296		7.6		40.6	4.1	4.3	1.8			8.9	2.6			24.4				5.7
																										ENSG00000091164						47.3	5.6	9.2					5.1		5.9	5.4						21.4
																										ENSG00000091181
																										ENSG00000091262								41				26.5						10.6			21
																										ENSG00000091317	0.328	0.328			4.6	28.7	4.4	11.2	2.1	4		3.1	2	5.2	15.8		2.5	1.7				8.5	0.8
																										ENSG00000091409	0.1343	0.1343				40.3		0.8	12						30.1	16.8
																										ENSG00000091436	0.1101	0.1101		3.7	4.2		10.3	19.4	5.9		20.7		2.3	2.6	1.8		7.7	0.9		10.6		2.1	7.8
																										ENSG00000091483	0.3201	0.3201				48.7		17.1	4.7						11	14.9
																										ENSG00000091490	0.2855	0.2855				33.3		5.5					4.3	34.2		11.5		2.2				2
																										ENSG00000091527						38.6	5.7		5		1.6					19.9						13.4	13
																										ENSG00000091542	0.1773	0.1773				49		5.9		2.4				12.5		21.7
																										ENSG00000091592
																										ENSG00000091640	0.2161	0.2161				48.4		31.3	3.7			2.7		6.2						7.4		0.3
																										ENSG00000091651	0.1109	0.1109			19.5	26.4	5.2	2.6	14			2.6		18.2							9.2	2.4
																										ENSG00000091732	0.2018	0.2018				50.4		13.6						6.6	5.7	22.8				0.9
																										ENSG00000091831						68.7								31.3
																										ENSG00000091947	0.218	0.218		9.3		37.2		23.6		2.5		0.2		12.9	6.9	2.4		3.1		2
																										ENSG00000091972	0.452	0.452		7.3	2.5	12.3	1.6	3.6	2.3	0.1	1.2		0.2	40.9	13.1		3.6				6.4
																										ENSG00000092010							4.1		45.4			25.5	1.7					5	18.4
																										ENSG00000092020	0.1471	0.1471		6.1	1	34.4	1.2	0.1		11.2	10.5			5.7	4.7			12.6				12.5
																										ENSG00000092036	0.138	0.138				55.8					4.7		13.3		7.4	18.8
																										ENSG00000092051						38.2		29.7									22.8	3.9			5.4
																										ENSG00000092067
																										ENSG00000092068
																										ENSG00000092094	0.1496	0.1496		7.8	0.9	37.8	1.2	19.5	3.3					22.1	0.6		2.5	4.2
																										ENSG00000092096	0.2331	0.2331		7.3		17.6	0.7		7.2						32.1			3.1				2.8
																										ENSG00000092098				5.1	2.7		0.3	4.1	6.4	2.2	5.3	11.4	7	1.2	8	2.1	5.1	1.9	13.3	8.5	15.2
																										ENSG00000092108	0.1094	0.1094				39.2			15.5	3.9						30.9			2.5			8.2
																										ENSG00000092140	0.1188	0.1188				16	16	11.6		1.9		10.7				20.8					1.3	12.7	4.8
																										ENSG00000092148						36.7	2.8		3.6			11.8	4.8			24.7		2.8		6.1	1	5.8
																										ENSG00000092199																100
																										ENSG00000092200						49.6								5.8	44.7
																										ENSG00000092201	0.194	0.194				47.5						0.5	7.2		8.1	36.7
																										ENSG00000092203
																										ENSG00000092208	0.1729	0.1729				59.2		3.2								35.4						2.2
																										ENSG00000092295					8.4	28.5		14.6					5.5				16.8	13.2				13.1
																										ENSG00000092330	0.1469	0.1469				23.2	3.1		12.8	10.3				5.5		7.4	10.3			6.9		3.9
																										ENSG00000092439	0.1246	0.1246				29.9	7.9	7.1				9	8.6			24.5		1.3		0.9	0.9	9.9
																										ENSG00000092470	0.1979	0.1979				49							11.9		4.2	33.1		1.2				0.6
																										ENSG00000092529				10.1		25.6		20.3	6.9			8		27.2				1.2			0.6
																										ENSG00000092531	0.1517	0.1517			7.1	32.4	3.7	18.6		4.5		5.6	2.9	0.1	18.6				3.7			2.8
																										ENSG00000092621						100
																										ENSG00000092758
																										ENSG00000092820	0.3139	0.3139				50.7				0.4			7.3	24.5		17
																										ENSG00000092841													3			56.3					40.8
																										ENSG00000092847				1.6		42		32.3		2.3						14.6					7.1
																										ENSG00000092853
																										ENSG00000092871	0.1407	0.1407			1.8	33	6.6	27.2	7.5			1.3	0.2	8		11.8	1					1.7
																										ENSG00000092929						38.8			11.6							23.1					5.3	21.3
																										ENSG00000092931						36.7		2.4	16.6	2.2			2.3			22.6						17.3
																										ENSG00000092964	0.3595	0.3595				36.1	0	31.5	9.8		1.7	5.5	1.2				2.8	4.8
																										ENSG00000092978	0.1151	0.1151		1.3		46.4				5.9		8.1	2.9			20.1		5	4.3		0.6	5.4
																										ENSG00000093000						32.1	8	23.5		1	1			2.9	9.4	8.4	5		2.6			6
																										ENSG00000093009
																										ENSG00000093010	0.2885	0.2885			2.6	44.4		40		0.4								3.1			4.2	1.6
																										ENSG00000093072	0.3801	0.3801			2	36.3	2	31.9	9.4			6.4	2			0.1	3.5	1.5	0.8			0.2
																										ENSG00000093100	0.2181	0.2181		0		32.9								44.7			8.4			3		0.9
																										ENSG00000093134	0.2402	0.2402			7.7	45.6		9.5	2.1			1.5	8.8	11.7	13
																										ENSG00000093144						27.2		1		12.7						8						14.9	36.3
																										ENSG00000093167	0.177	0.177			11	9.2			15.4	6.3	2.3	1.9			21	3.6	2.1	2.9		1.4		2.8	7.1
																										ENSG00000093183	0.2575	0.2575				43.5						1.4	6.3		14.8	29.2						1.5
																										ENSG00000093217						41.3			3.6	13.7		19.7	2.2	2.1		7.5	2.1		0.1			7.7
																										ENSG00000094631	0.272	0.272		3.2		40	0.9	11.4	5.8	0.2	7.2			5.8	3.7	4.8	5.4	9.8		0.5		1.3
																										ENSG00000094804
																										ENSG00000094841	0.1023	0.1023				48.9				4.7					13.7	32.7
																										ENSG00000094880	0.2949	0.2949		1		50.7							4.2			44						0.1
																										ENSG00000094914	0.3336	0.3336		3.5		40.3		11.1		0.4			2.8	12.5	10.7	8.6	0.5	1.5		8
																										ENSG00000094916	0.2286	0.2286				47.6							4.7		22.8	15.8		2.3
																										ENSG00000094975						18.6	4.9	14.8		1.7		11.7	9			15.3		5.4	3.7		1.3	13.6
																										ENSG00000095002	0.1817	0.1817			3.6	41.4										43.9		2.8				8.2
																										ENSG00000095015
																										ENSG00000095059	0.2872	0.2872		8.4	1.4	31.7		16.8				7.9		9.1	16.7		3.8	1.2				3
																										ENSG00000095066				7.3		23.3		18.8					15.2	16.8				17.7		0.8
																										ENSG00000095139						23.7		20.8					0.6			43.6						11.3
																										ENSG00000095209	0.1226	0.1226				45	4.1								14.1	36.8
																										ENSG00000095261	0.1449	0.1449				44.5										45.7					3.7	6
																										ENSG00000095303	0.1069	0.1069			4.9	3.7					10.2					50.1		18.5
																										ENSG00000095319	0.3433	0.3433				50.7								4.2	11.8	28.6		4.7
																										ENSG00000095321						33.2		20		5	15		0.6			8.2	0.1		3.7			2.4
																										ENSG00000095370						0.5	5.3				10.5	12.8										46.9	19.6
																										ENSG00000095380	0.1332	0.1332				11.7		41.7				10	7.6		3.7	11.6	7.1	6.5
																										ENSG00000095383	0.3148	0.3148		1.5	5.7	13.9	2.5	27	6.2	3	1.8	7.3	5.5		0.1	2.5	1.8	5.5				5.5	1.3
																										ENSG00000095397	0.1115	0.1115				18.8			4.4	3.6	7.6		28	6.8			6.9						16.6
																										ENSG00000095485	0.1533	0.1533		9.1	3.5	26.1		16.5	0.4		6.5	1	0.3	4.3	12.4	11.1	5				3.9
																										ENSG00000095564						27.9	0.4					7.8				29.8		14.8	15.4			3.9
																										ENSG00000095574							10.5	32.1								39.5						17.8
																										ENSG00000095585	0.4437	0.4437			6.3	31.2								46.2
																										ENSG00000095637
																										ENSG00000095787
																										ENSG00000095794	0.1098	0.1098					14.9					45.9		13.2	11.2							14.8
																										ENSG00000095906	0.1029	0.1029				47.7		17.4			6.9		0.6	17.5	3.3					6.8
																										ENSG00000095932
																										ENSG00000095951
																										ENSG00000096006				15		25.5	22.1		6.2				9.5	7.4									12.4
																										ENSG00000096060									25					75
																										ENSG00000096063	0.33	0.33			6	41	2.2	25.3		1.9	2.9	0.3	6.6	0.6	8.7	0.9	1.1			0.5		1.9
																										ENSG00000096070	0.1021	0.1021			5.1			19.2	16.3			14.7	3.8			25.4		11.3			4.2
																										ENSG00000096080	0.1784	0.1784			3.5	36.2	4.3	20		7.6		1.2		7.4	5.1	8.2		0.1		6.4
																										ENSG00000096092	0.1276	0.1276				48						9.3	1.1		2.2	39.4
																										ENSG00000096093						28.7							22.1			23.1			9.8		0.7		15.6
																										ENSG00000096384	0.319	0.319				49.6								6.6	16.5	21.7
																										ENSG00000096401																81.2				18.8
																										ENSG00000096433	0.3114	0.3114				38.1			3			3.3	9.2		10.8	26.4	2.6	6.7
																										ENSG00000096654	0.2068	0.2068				35.1		3.2	1.7			18.3	6.2			26.3		1.3	3.7		4	0.2
																										ENSG00000096696	0.106	0.106					3	13.8	4.6		6.2		3.8	32.8	22.2		6.1	3.3			4.1
																										ENSG00000096717						36.4		2					14.9			29.7			1.1			15.9
																										ENSG00000096746
																										ENSG00000096872						51.1	12.2									22.8		3.5				10.4
																										ENSG00000096968						2.6	15.4		1	23.7				22.4						5.4	4.2		11
																										ENSG00000096996	0.2119	0.2119				38.6	0.4		10.1		3.4	9.2	7.1	9.1		17.3			3.7	1.1
																										ENSG00000097007	0.3064	0.3064			3.8	43.7	1.3	11.1	3.8	0		6.9	4.4	3.4	3.5	15.3	0.9	1.9
																										ENSG00000097021				3.1		38.4				1	11.5	12.7	10.1			3.7		6.1	12.5		0.9
																										ENSG00000097033	0.2885	0.2885		4.5	3.4	38.4	0.4	21.3		2.3	1.6	0.9		5.7	14		2.3			2.4		2.8
																										ENSG00000097046	0.1243	0.1243			6.6	19.5				4		2.7	14.4	16.4		25.6	0.8					9.9
																										ENSG00000097096	0.1032	0.1032				38.7	8.1		2.5	9.4	1.4	4.1	5.8		14.5	12		2.3				1.2
																										ENSG00000099139					0.1	18.1	8.2	4.6	10.5	6.6		9.7			6	14.5		0.4	0.7				11.4
																										ENSG00000099194				1.3		57.9	6											34.8
																										ENSG00000099203					2.5	43		40.8		0.2	2.6							3.6		2.6	4.7
																										ENSG00000099204	0.2002	0.2002				42.7		0.3	4.9						35.9	8.1
																										ENSG00000099219	0.2047	0.2047				20.1	1.7	3.2	6.1			20	6.2	3.7		15		3.1	5.3			7.1
																										ENSG00000099246	0.1856	0.1856		4.7	0.6	21.3	5	5.5	1.8	4.4	2.8			3.2	15.1	2.3		3.4	6.3		6.9	5.7	3.5
																										ENSG00000099250	0.1248	0.1248		4.1	1.2	20.1	1.1	18.2	7.2		8.3					8.5		5.8				3.3	8.7
																										ENSG00000099251																100
																										ENSG00000099256					20.8	6.4		37.2										0.9	15.4
																										ENSG00000099282
																										ENSG00000099284	0.1795	0.1795			3.9	50.1									22.2	10.4		1.6				11.8
																										ENSG00000099290					22.9				6	35.3						6.2					10.9	18.7
																										ENSG00000099308	0.1842	0.1842				46.1			12.9						21.4	9.3						0.1	10.1
																										ENSG00000099326	0.1185	0.1185				32.4					0.1			1.6	21.1			25.4			4.8	1.3
																										ENSG00000099330	0.1637	0.1637		3.6		33.7	0.2	27.4	4.2	7.2	4.6	2.8		3.7	4.2			3.7			1.4	3.2
																										ENSG00000099331					3.3	32			27.9							21.8						15
																										ENSG00000099337	0.1693	0.1693		4.5	2	31.8		36.6	1.9		3.2	13.8	4.6							1.6
																										ENSG00000099338					10.1	25.9	0.2		3.6	17.2	25		0.3				6.2	2			9.3
																										ENSG00000099341	0.275	0.275			4.8	36.8		24.1	6.4	1.5		6.8			11.1	0.8	2.1			5.6
																										ENSG00000099364	0.1322	0.1322		4.9	7.2	38.3		30.4		2.8				13.7	2.5							0.1
																										ENSG00000099365						57.4								21.2	8.3			13.1
																										ENSG00000099377
																										ENSG00000099381	0.3266	0.3266		0.3	5.8	34.2	2.3	9.1	9.4		0.9		5.9	4.7	13.5	6.4	1.1	3.8				2.7
																										ENSG00000099385	0.1659	0.1659			5.7	42.3		16.4	1.4	2.5			6.1	5.6	12	0.5	2.6				3.5	1.3
																										ENSG00000099622					4.6	33								34.1			25.5			2.8
																										ENSG00000099624	0.1188	0.1188			0.4	32.6	2.3	20	3.7	4.1	2.1			9.9	4.1							6.6
																										ENSG00000099783	0.209	0.209				49.7	0.9	14.3						5.2	15.9	13.4				0.6
																										ENSG00000099785											34.1					58.9		7.1
																										ENSG00000099795	0.1246	0.1246			7.7	30.7	1.1	22.9	1.3	4.2	1		4.7	1.9	6.4			1.7			3.5	3.4	1.6
																										ENSG00000099797	0.2193	0.2193		6.7		36.7		10.9	1.8	3.8					24.2	10.5				3.5		1.9
																										ENSG00000099800	0.2154	0.2154		2.1	6	37.7	1.5	28.3		3.3		1.5		5.3	8.1			1.3		1.9		2.9
																										ENSG00000099804
																										ENSG00000099810	0.1811	0.1811				51									14.7	28.5						5.8
																										ENSG00000099814					0.1	19	0.6				13.4				25			1	2.3				13.4
																										ENSG00000099817						42.1		31.3	0.4	4.8				5.9		5.9					4.5	5.2
																										ENSG00000099821	0.237	0.237		4.7	0.9	43.1		12.1			3.6		2.4	4.2	22.5	2	1					3.6
																										ENSG00000099822
																										ENSG00000099840
																										ENSG00000099849				6.1		34.9		4.3	6.3		17.1			5.1	20.6							5.6
																										ENSG00000099860						15.4			15			30.2						6.2	1.3			23.4
																										ENSG00000099866						54.5	1.8		6.1							8	10.1					19.5
																										ENSG00000099875						38.2			45.8					9.7								6.4
																										ENSG00000099889	0.3029	0.3029				18.7			8.8		2.9	55.7
																										ENSG00000099899	0.2938	0.2938		8.5	3.7	37.2	0.5	23.2		0.3	1.2	3.3	0.4	1.9	16.6		2.2	0.9
																										ENSG00000099901	0.2446	0.2446				54.2		17.2					1	10.7	10.3	5.8				0.8
																										ENSG00000099904	0.2284	0.2284		6.2	6.7	37.7		20.1	1.1	0.1	4.9		7.4	0.5	12.6		0.3					2.5
																										ENSG00000099910	0.2512	0.2512		9.3	4.4	24.1	2.2	8.3	4		2.6	5.7	4.7	10.4	17.4	2.2	4.2					0.5
																										ENSG00000099917				5.9		36.4		10.7	0.1	0.1	7.1		8.4	4.4	7	5.5	5.5			3.3		5.8
																										ENSG00000099940	0.1297	0.1297			0.8	20.5	5.5	4.9	7.3			4.6	12				0.5				13.7		11.6
																										ENSG00000099942	0.108	0.108		1.3	1.9	5.6	1.5	14.5	7.5			10.8	5.8	1.2	11.2	21.6	5.3	4.1			1.9	5.9
																										ENSG00000099949	0.2789	0.2789		6.7	4.6	33.1	3.3	17.4	2		4		8.6	4.2	9.8	0.4	1.9	1				3
																										ENSG00000099953	0.2183	0.2183		2.2	5.6	30.7				5.7				48.5			1.1					6.2
																										ENSG00000099954						30.2		28.3									9.7			9.6			3.3
																										ENSG00000099956	0.3421	0.3421			3.4	43.3		17.4		0.3				19.3		6.6				4.8		0
																										ENSG00000099958	0.1463	0.1463		3.3	5.4	25.3	0.4	10.3		4.2		1.7		24		8.5	5.1	2.6				0.1	0.9
																										ENSG00000099968	0.1481	0.1481				55.6	2	9.3	4.2							17.3	1.3						1.5
																										ENSG00000099974
																										ENSG00000099977	0.1293	0.1293		7.8	2.7	21.4		15.2	5.9	7.3				0.4	16.2	11.3		0.9					2.1
																										ENSG00000099985						52.7		14			2.1		12.4		9.2	2.3		7.1
																										ENSG00000099991	0.1263	0.1263			0.6	19.1			18	3.9	17.4		8.5	2.4	6.2		4.1	1.5		6.3		2.1	5.5
																										ENSG00000099992	0.2658	0.2658		4.8	2.6	34.5	0.1	10.2	1.8		2.9	2.3	6	8.4	13.4		3.9	0.8			0.1	8.2
																										ENSG00000099994
																										ENSG00000099995	0.1092	0.1092		6.2				22.6	22.8	0.6		10.7	3.2		2.8	13.5	4.6	7.9		2.1		3
																										ENSG00000099998
																										ENSG00000099999				0.8	0.2				14.6		13.1		9.5	14.1		22.6	13.4			2	6	3.7
																										ENSG00000100003
																										ENSG00000100014	0.2152	0.2152		2.3		37.1			11.3			7	8.7	5.5	5.7	17		5.3
																										ENSG00000100023	0.3498	0.3498		7.4		43.4		11.2						8.3	7.7	14.6	3.6	2.3		1.6
																										ENSG00000100024				0.5	1.3	27.4	1.7				0.4	12.1	2.4			10.1
																										ENSG00000100027	0.5007	0.5007		4		9.6	0.1	5.1	6.2	2.2	4.9	17.6	9		10.4	7.2	0.5	1.8		3.1	6.7	5.9	0.1
																										ENSG00000100028	0.263	0.263		1.1	4.1	43.4	2.1	20.9		0.8	1.8		5	7.4	1.1	10.4					1.3	0.5
																										ENSG00000100029	0.3867	0.3867			4.7	43.6	0.1	23.5				3.5		1.9	15.7	1.4				4.1		1.6
																										ENSG00000100030	0.2038	0.2038		3.2	4	23.6	4.1	17.2	2.1	0.3	1.7	10.3		4.3	16.5	5.4		2.2	2.5			2.8
																										ENSG00000100031													58.8						16.2	17.5	7.5
																										ENSG00000100034					4.5	54.5			11.7	6.8			4.1			18.4
																										ENSG00000100036	0.1361	0.1361			4.5	37.2	0.3	32.2	3.5	0			2.6				7.7				2.5	0.6
																										ENSG00000100038	0.1074	0.1074		2.7		38.8		8.7			3.8			12.2	6	9.5	4.4	10				3.9
																										ENSG00000100055	0.1294	0.1294				42.3						6.8				16.4						17.7	10.2
																										ENSG00000100056						34.6				15.7			6.6	6.6			6.7			19	10.8
																										ENSG00000100058					55.3	44.7
																										ENSG00000100060	0.2868	0.2868		2.5	1.6	39.2	0.4	17.4	0.4	7.1		0.5	1.1	1.3	19.6	0.4	1.4			4.9		2.2
																										ENSG00000100068					13	21.3				9.8	4.4						8.3		2.1				24
																										ENSG00000100075	0.1404	0.1404				54		20.4			2.7			7.9	8.1					6.6		0.3
																										ENSG00000100077	0.1905	0.1905		2.2		35.4	4.6	22.7	8.3	10.1		2.7	6.3	1.1			0.1				6.4
																										ENSG00000100079	0.15	0.15				40.9		27.3	4	0.3		7.7	8.7	2			9.3
																										ENSG00000100083	0.1902	0.1902		6.2	2.7	30		20.8		0.4	3.2	7.3	5	7.3	6.2	0.4	6.1			3.8		0.5
																										ENSG00000100084					5.8	30.4				11.5						33.4
																										ENSG00000100092	0.1198	0.1198				44.8		25.4			7.4	1.1		3.7				5.4				12.2
																										ENSG00000100095	0.1907	0.1907			5.5	33.8	1.2	22.6		5.1		1.8	3.4	3.7				2.6	7.6			6.4	0.9
																										ENSG00000100097	0.2295	0.2295		0.1	5.2	33.2		36.7	0		1.4	1.6	1.3	2.4		2.5	1	3.6			1.7	3.1	0.2
																										ENSG00000100099	0.3194	0.3194				46.1							0.7	8.5	10.3	20.1	1.9	6.7
																										ENSG00000100100	0.3309	0.3309				39.3			9.7						36.5	5.4	3.8	0.6		3.4		1.3
																										ENSG00000100101	0.1122	0.1122		7.4		23.8		23.9				13		5.4	10.4					10.8		5.3
																										ENSG00000100104	0.1661	0.1661				58						7			3.1	31.9
																										ENSG00000100105	0.3582	0.3582				42.6				2.7				11.3	10	20.3				1
																										ENSG00000100106
																										ENSG00000100109																	84.2			15.8
																										ENSG00000100116				3.4		33.6	9.6					1.5	3.5		37.7						10.8
																										ENSG00000100124	0.102	0.102				44.6		7.6					5.1	6.6	27.9		1.1			1.6		5.5
																										ENSG00000100129	0.3611	0.3611			2.5	39.4		17.3		6.8	1.1	1.1		3	15.5	5.3		1.4		0.4
																										ENSG00000100138	0.3189	0.3189				46.6	0.9	14.1		0.6					17.9	11.1				3.3
																										ENSG00000100139	0.1904	0.1904		0.4	0.9	21	2.7			4.2	3.5	2.1	8.7	4.4		6.6	0.6	0.5	17.2		9.8	8.2
																										ENSG00000100142					0	40.9	5	20.6		2.6	8.5		3.1	4.8	3			0.9		4.2		6.3
																										ENSG00000100147	0.1752	0.1752		5.2	2	29.6	7.5			3.1	0.8	6.4				22		3.7			7		0.3
																										ENSG00000100150	0.1934	0.1934				41.5			0.6	1.4			3.1	12.6	4.3	19.2	9.9	7.2
																										ENSG00000100151	0.1476	0.1476		3.3	1.6	20.7		12.1			2.1		0.6	15.1		6.1	3.6			0		4.7	9.8
																										ENSG00000100154	0.1081	0.1081			4.7	30.8	1.8		16.4			10.5	9.5		17.4	4.3			4.7
																										ENSG00000100162						52.2				17.3											30.5
																										ENSG00000100181	0.1219	0.1219			4.2	5.8	16.1			10						34.2					3.3		15.9
																										ENSG00000100197																		100
																										ENSG00000100201																60.6
																										ENSG00000100207				3.3				28.3	15			12.2	11.1			27.7		1.3			1.1
																										ENSG00000100209	0.1229	0.1229				40.3	9.6	11.1	6.8					4.6	12.5
																										ENSG00000100211						44.5								16.7	38.8
																										ENSG00000100216	0.2213	0.2213				57.7		21.1							15.1	6.1
																										ENSG00000100219	0.2274	0.2274				40.9			0.6			23.4	9.3	8.4		14.4					2	1
																										ENSG00000100220	0.3607	0.3607				44.1		22.4	6.5			1.3		5.2	4.8	6.5				0.8
																										ENSG00000100221	0.2792	0.2792				41.2						17	5.2			25.8	0.3	2.3				1.6	0.2
																										ENSG00000100225								100
																										ENSG00000100226
																										ENSG00000100227	0.1138	0.1138				47.8		13.2						17		18.6						3.4
																										ENSG00000100228						76.4			23.6
																										ENSG00000100239	0.1225	0.1225		5.5	0.3	26.2	3.6	9.7	10.7		6.5		3.7	9.7	7.8		6.4	1.5		8.4
																										ENSG00000100241	0.2208	0.2208			7	30.6		7.8	10.2		8.1	2.2	8.1	0.3	14.8	0.7		3.5			0.5	6.2
																										ENSG00000100242	0.3043	0.3043			5.7	33.8		6.9	3.6	3.7		6.5	12.5		8.3	9.3	0	1.6		1.1		2.7	1.4
																										ENSG00000100243						58.3				4.5										1.9	14.2	3.6
																										ENSG00000100246						21.8	12.2			21.3	16	11.7					13					4.1
																										ENSG00000100258
																										ENSG00000100263	0.1226	0.1226				50.2		26.9	0.6						11					7		4.3
																										ENSG00000100266	0.2783	0.2783			1.3	50.8		18.8	4						9.5	14.8					0.7
																										ENSG00000100271	0.1296	0.1296				45.3									25.2	12.1	0.6			11
																										ENSG00000100280	0.3458	0.3458			6.6	41.3		33.7		1.1		0.9		9.6		1.1		1.4		0.5		3.7
																										ENSG00000100281	0.1321	0.1321				47.4						1.1	8.1			36.4					6.8	0.2
																										ENSG00000100284	0.1709	0.1709			5.2		1.8	34.9		5.3		14.2	8.6			9.2		10.2				10.7
																										ENSG00000100285	0.1013	0.1013		9.1	3.3	20.8	3.5	19.5	3.9	3	4.2	1.6	1.8	1.1	2	7.8		5.2	0		5.3	8.1
																										ENSG00000100288				15.1	4.9			15.7	4.7	7.6		7.4	9.2	6.2		4.4		6.5					3.3
																										ENSG00000100290																			24.9		75.1
																										ENSG00000100292	0.2825	0.2825			4.9	21.7	2	25.6	15.2	4.8		6.1	4.5	1.4		6.2		2.3				5.3
																										ENSG00000100294						57.3		22.2			6.2										14.3
																										ENSG00000100296	0.3236	0.3236		0.5	5.8	37.9		17.2	1.2		0.2	6.3	3.7	1	2.3	9	4.9	0.2				2.2	0.2
																										ENSG00000100297	0.2595	0.2595		1.7	6.8	39.5	1.1	22.5	2.1		1	0.6	2.9	16.4		2.3	1.4			0.7
																										ENSG00000100298				0.9	0.7	6.6		2.9					24.1	21.6		6.6	15.9
																										ENSG00000100299						2.9		28.3			11.6					31.7						25.5
																										ENSG00000100300								35.8		1		6.9	7.7			36.6		1.6			5.5	4.9
																										ENSG00000100304	0.1104	0.1104			2.8	39.6		26.3		3.2		8.5		7.8	5					4.8	0.8	1.2
																										ENSG00000100307	0.1519	0.1519						0.4	17.2				5.1	16.4	12.4		29.3			6.2			3.7
																										ENSG00000100311	0.1686	0.1686				23.3			11.4				8.8			20.1	7.1	11.2			0.2		7.1
																										ENSG00000100316	0.2585	0.2585				42.2		0		8.3				7.5	26.2	2.4		0.6		0.8	4
																										ENSG00000100319
																										ENSG00000100320	0.111	0.111				20.2		7.3	6.2			34.7	17.9			6.1						7.6
																										ENSG00000100321	0.1806	0.1806				39.4		27.8	3		0.4	6.8	5.9	0.1			1.6					8.8
																										ENSG00000100324	0.3749	0.3749			3.4	37.1	2.6	21.7		2		3.8	2	2.2	13.7	1.5		0.3				5.3	1.2
																										ENSG00000100325						15		40.3			21.5							17.5				5.7
																										ENSG00000100330	0.2645	0.2645			3	48	0.8	15.8	1.8				10.1	0.6	19						1.1
																										ENSG00000100335	0.3087	0.3087				52.8						1.5	0.9		19.3	23.6		1.9
																										ENSG00000100336
																										ENSG00000100342									51.8			10		21.8				0.5	15.8
																										ENSG00000100345									100
																										ENSG00000100346	0.273	0.273		5.8		27.2	1.2		10.6	3.1					42.5
																										ENSG00000100347	0.2736	0.2736				48.3		25.9	3.4			0.2	0.5	11.8		9.8
																										ENSG00000100348	0.1873	0.1873				48.1		33.5	1					4.4	4.6					8.5
																										ENSG00000100350	0.1251	0.1251		1.9	7.1	27.2	4.3	17.5	1.7		2.8		1.2		10		3.2						0.2
																										ENSG00000100351				5	5.1	16.5	4	14.4	9.8		8.5	4	6.5	4.4	8.4	3.1		5.1				5.2
																										ENSG00000100353	0.3331	0.3331				44.1		14.4		6.1	1.5	1.5		8.7	9.8	11.7				2.3
																										ENSG00000100354
																										ENSG00000100359	0.2202	0.2202		9.8		38		10.1						29.9	6.1		2.9					3.2
																										ENSG00000100360	0.1253	0.1253				45									16.9	15.1	7.4	15.6
																										ENSG00000100362
																										ENSG00000100364	0.3819	0.3819		1.5	3.6	29.3		33.7	7.4			9.3	3.4			0.3	1.1	3.7				3.2
																										ENSG00000100365	0.3051	0.3051		3.2		47.9		6.6				11.2	8.4		5.5	10.8	2.1	0.7				3.6
																										ENSG00000100368	0.1991	0.1991				51.8	1.4	22.1							16.1	2.4
																										ENSG00000100372	0.2198	0.2198				50							2.8			43.1
																										ENSG00000100373	0.1569	0.1569			5.6	36.1		41.2				0.9		0.8							3.6		0.9
																										ENSG00000100376						44.6
																										ENSG00000100379	0.2649	0.2649				46.1		35.7		2.2			4		5.1					6.9
																										ENSG00000100380	0.2714	0.2714				33.2			6.2	4	2		2		16.3	14.2	5.1	5.9					1.3
																										ENSG00000100385	0.5065	0.5065				14.6	0.7	11.3	5.5		10.7	22.2	7.9		6.2	5.9	0	0.9			4.4		0.3
																										ENSG00000100387	0.1324	0.1324				47		26.2	13.7		0.7	7.8
																										ENSG00000100393
																										ENSG00000100395	0.3808	0.3808				48.8		7.1							9.1	26.5		4.2		1.8
																										ENSG00000100401	0.2979	0.2979		6.4	3.4	35.3	0.7	18		0.3	1	5.2	3.4	1.4	19.7	0.8					0.1	4.3
																										ENSG00000100403	0.2948	0.2948			2.2	45.6	0.9	5.8		1.9			1.8	4.9	12.4	18.4		4.8				1.2
																										ENSG00000100410						53.4															23.4
																										ENSG00000100412	0.3455	0.3455			5.5	44.2	1.9	23.9				2.9	1.3	3	9	4.4			0.8		0.5	2.6
																										ENSG00000100413	0.3062	0.3062		1.6	3.6	38.5	1.1	14.8		4	0.1	2.8	4.2	5	11.2	8.2		2.2		0.9		1.7
																										ENSG00000100416	0.2095	0.2095		12.6		28.1	0.9	9			4.8	0.9	2.1	0	16.7		3.3	9.4			3.5		4
																										ENSG00000100417						33.3		17.8	2.8	4					15		8.8	0.8		10.5			5.8
																										ENSG00000100418						47.4			24.8							22.5		5.3
																										ENSG00000100422	0.2651	0.2651				32.6			9.2		1.1	1.1	24.4		9.9	19.8		1.8
																										ENSG00000100425	0.1842	0.1842			5.6	32.2		8.4	8.1	3.7		8.1	9.4	3.2	4.2	11.4		3.8				1.7
																										ENSG00000100426	0.1978	0.1978		5.4		37.8	2.4		9.1	2.8		12.4	4.2			25.9
																										ENSG00000100427	0.3769	0.3769		5.4	0.2	19.5	4			2.4	12.5	29.4			14.4			0.7			7.7
																										ENSG00000100429				0.4		40.8		28.2			11			0.2		3	1.1	1.5			1	12.8
																										ENSG00000100439	0.1316	0.1316				50.1		7.4		2.5					24.5								5.2
																										ENSG00000100441						0.3										21.4	40.4						14.3
																										ENSG00000100442	0.1006	0.1006				45.6		31.6	11			2				3.4						0.3
																										ENSG00000100445	0.141	0.141				53.2								27.3	10.3	4.4		4.7
																										ENSG00000100448					2.8	1.7	12.1	10.3	12		1.6			7.9	9.3		14.2			1.2			12.1
																										ENSG00000100450	0.2481	0.2481				14.8		2.8		4.8		4.3	23.9	19.3	2.6	18.3	6.6					2.6
																										ENSG00000100453	0.3048	0.3048				22.6	1.8			0.2	1.8	31.2	14.2	13.7	7.5	6.1	0.7
																										ENSG00000100461	0.1822	0.1822		9.5	4.4	52.3	1.5	19							10.7							2.5
																										ENSG00000100462	0.1291	0.1291			6.9	20.4			10.9	5.5	8.9	14.2	9.6		8.9	2.9	0.3	1.9				4.2
																										ENSG00000100473														100
																										ENSG00000100478	0.105	0.105				39.2	5.4						4.9		18.3	10.4		2.5				7.4	11.8
																										ENSG00000100479						28.4										3.4
																										ENSG00000100483	0.1638	0.1638		4.2	3.7	35.3	5.5	21.7		6.9					6.8		0.7				2.6	2
																										ENSG00000100485	0.1804	0.1804		0.4	2.4	32.7	3.7	22.4	1.3	0.8	1	8.7		1.4	15.7	1.1		0.5		2.1		5.8
																										ENSG00000100490				7.7	0.1		3.3	19.5		3	10.6	15.8	2.4	25.6		1.5	3.8	6.8
																										ENSG00000100503				8.4		31	2.1	28.1	0.9			5.4		4.1	9.3	5.3				5		0.6
																										ENSG00000100504	0.408	0.408			5.3	43		16.3			2.8	0.9	9.1		9.1	7.7	2.4		0.9			2.6
																										ENSG00000100505	0.1197	0.1197		3.3	10.4	24.5	0.8	19.5				1.1			12.9		1.1	12.2	1.6	0.1	2.2	2.8
																										ENSG00000100519						28.7				10.7	0.3									16.5		7.5	32.1
																										ENSG00000100522	0.1718	0.1718				44.5	3.7						2.1		5	39.7						4.9
																										ENSG00000100523	0.2025	0.2025				34.6		7.3		2.7		9.2	10.9			23.9						11.4
																										ENSG00000100526
																										ENSG00000100528	0.111	0.111				35.7		7.8								18.7						25.8
																										ENSG00000100532						35.1	1.6					4.4	10.9			34.2						13.7
																										ENSG00000100554					11.2			8	23.8					7.4	33.8			3.6		0.9		11.2
																										ENSG00000100558
																										ENSG00000100564	0.2059	0.2059				43.4	0.1			3.9			7.7	4.2		34.8
																										ENSG00000100567	0.1644	0.1644				44.7		16.9	12.6	1.1	0.4	2.3			3.7	12.2	2.5					3.6
																										ENSG00000100568	0.148	0.148				52.2		9.5	18.8		6.6		4.7			2.1			2.9			3.2
																										ENSG00000100575	0.1171	0.1171				53.2								0.6	34.3
																										ENSG00000100577	0.2226	0.2226				37.1		27.6	6	1.1		12.7	1.9	5.1						1.7			5.9
																										ENSG00000100578	0.1299	0.1299				26.8		17.5				7.4	4.2			38.1					2.3	3.8
																										ENSG00000100580	0.1404	0.1404		3.9		18	2.8	24.4		2.3	5.4	9.3		2.5	8.1	4.9		0.7				8.4	2
																										ENSG00000100591	0.2167	0.2167				42	7.1	6.5	0.3				2.3	6.6	10	17.7	3			2.8		1.6
																										ENSG00000100592	0.1453	0.1453				39.9			2.4	1.2		16.7	11			10.9				1.3		16.5
																										ENSG00000100596										11.1			7.6		16.5	16.9
																										ENSG00000100599								14.9		13	8.6		8.1			19.9		3.5				24.8	0.5
																										ENSG00000100600	0.1467	0.1467				36.7									31.2
																										ENSG00000100601						46			13.4					12.3	10.7	17.6
																										ENSG00000100603	0.1182	0.1182				37.4	12.8		1.2							48.6
																										ENSG00000100605	0.1247	0.1247			3.8	35.3					6.9	7.5			11.8	18.6		4.7	4.6			6.7
																										ENSG00000100612	0.1943	0.1943				47.2	7.1	3.4	1.4			6		4.3	25.3			1.4	3.9
																										ENSG00000100614	0.1711	0.1711		1.9	5.1	22	3.8	18.7	2.1	0.9	3.4	8.3	3.1	1.2	13.5			5.5	3.5	6.4	0.5
																										ENSG00000100628						100
																										ENSG00000100629	0.1654	0.1654		6.6		42.2	3.3						12.5			27.5						8
																										ENSG00000100632	0.1535	0.1535				58.3		35.1	3.4							3.1
																										ENSG00000100644						37.7		22.7				1.9			6.1							12.4	7
																										ENSG00000100647	0.194	0.194			4.1	38.6	1.5	18.1	0.1			2.2	1.8		14.8	3.4	1	1		1.3	0.6		4.6
																										ENSG00000100650						24.7								11	0.1	29.2		35.1
																										ENSG00000100664	0.1004	0.1004				37.9	3.8			0.1			3.4			35.7			5.3			13.8
																										ENSG00000100678																100
																										ENSG00000100697
																										ENSG00000100711	0.1273	0.1273		4.8	5.3	33.8		9.5	20.6	2.7								0.4					22.9
																										ENSG00000100714	0.2893	0.2893				59.1			4.5					2.1		34.3
																										ENSG00000100721	0.5373	0.5373		6	1.4	8.1	0.2	3.9			0.1	1.8		39.9	13.2	4.8	2.8	0.6			6.3	2.7
																										ENSG00000100722	0.2105	0.2105				47										48.2					4.8
																										ENSG00000100726	0.2211	0.2211		3.9	6.6	37.4	0.1	17.1			3.1	0.1		13.6	7.1	0.9						3.4
																										ENSG00000100731	0.1989	0.1989				45.7	1.8	31.9	6.3			3.2		7.2						3.8
																										ENSG00000100744
																										ENSG00000100749	0.1947	0.1947		5.8		60.1									2.8	31.2
																										ENSG00000100764
																										ENSG00000100767						49.9		6.5			20.5	1.9					21.3
																										ENSG00000100784						39.2		31.6	5.5				6.1					3.4	4.4			3.8
																										ENSG00000100796	0.1139	0.1139				20.6	3.5	16.8				7.7	15.8			19.9				5.3		10.4
																										ENSG00000100802
																										ENSG00000100804	0.2315	0.2315			1.4	38.2		17.7	6.9	1.5		4.1			13.4	3.5				6.4
																										ENSG00000100811	0.1663	0.1663		4.7	0.2	33.3			8.9			9.3	8.8			21.6			1.2			5.9	0.2
																										ENSG00000100813																100
																										ENSG00000100814	0.2871	0.2871				48.3								9.2	11.2	19.2		1.4
																										ENSG00000100815						20.4	5.5	10.8	4.3			9.1				32.1				0.5		17.3
																										ENSG00000100823	0.3635	0.3635				48.6		16.4		1.9		0.9		5.5	10.2	10				0.5			1
																										ENSG00000100836	0.1448	0.1448		7.1		40.2		34	4.2					13.7		0.8
																										ENSG00000100852						36.3	9.1	1	2.7			12.5	7.8		0.8	16.5						13.4
																										ENSG00000100865					5.9	28.8	4.3	19.6	6.3	5.1		10.7	1.6		8.1	5.2		0.9			3.5
																										ENSG00000100883						34.5	0.9			2						39.8						13.8	9
																										ENSG00000100888				11		18.1		23	4.7			4.6	1.3			29		8.4
																										ENSG00000100889	0.3302	0.3302			2.4	37.9		23.9	8.5			6.5	4	8.6	2.7	0.1		2.2		2		1.2
																										ENSG00000100890						18.4		7.9	12.2				1.5		30.8	15.8						13.4
																										ENSG00000100897	0.117	0.117		1.4	2.1	9.4	1.7	1.9	5.9	2	4	5.6	5.8		7	6.1		1.5	13.8	9.7	18.1	4
																										ENSG00000100902	0.1163	0.1163				46.7		28.6	14.1		2.7							7.8
																										ENSG00000100906					6.1	39									7.2	16.5					4.4
																										ENSG00000100908	0.1378	0.1378		1.8		33.2	1	19.3	8.2		4.2	9.5			11.4		1.5				2	8.1
																										ENSG00000100911	0.2044	0.2044				29.3			46.6			14.4	1						8.8
																										ENSG00000100916						36						15.3				41.6						7.1
																										ENSG00000100918					1.1				28.9	15.1		21.4	11.1						14.8			7.7
																										ENSG00000100926	0.1017	0.1017			10.6			7.6		15.7				15.1				27.5		15.7		7.8
																										ENSG00000100934						13.3	11.9	16				14.1		3.9		26.7					5.1	8.9
																										ENSG00000100938	0.168	0.168		7.7		46.3			2.2		12.4		9.4			6				2.1		3
																										ENSG00000100941														64.9	34.2	1
																										ENSG00000100949	0.2406	0.2406			1	48.7		32.1	1.3			0.9			7.8	0.1				8
																										ENSG00000100979
																										ENSG00000100982						34.5			10.2		10.7			8.8	9.4		5.6			20.2		0.7
																										ENSG00000100983	0.3925	0.3925			1	47		32.1					1.3		6.8	4.1				3.2		4.5
																										ENSG00000100985	0.213		0.213	2.5		43.4						12.9	19.6		12			4.7				4.9
																										ENSG00000100991				7.2	8.4	9.2		0.9	3.5	2.3	2.2	6	3	1.1	3.3	1.3	3.9	1.5		8.8	11.8	0.1	7.8
																										ENSG00000100994	0.2115	0.2115			13.9	31.7	0.8	21.2	1.8	1	4.2	4.2	3.3		8.9	0.3	0.2	0.6	2.7	5.1
																										ENSG00000100997	0.2615	0.2615			6.4	46.1	0.6	27.9	3.7				4.7		6.1	4.4	0.2
																										ENSG00000101000	0.2695	0.2695			2	29						23.4	15.9		4.3		9.4	0.6	2.5		1.2	5.9
																										ENSG00000101004	0.1178	0.1178			7.8	19.5				10.9		23.6	7.2		1.7								29.2
																										ENSG00000101017	0.4577	0.4577		7.7	2.7	22.9			6.3			1.5	2.7	39.8	4.2		3.1				3.5	0.1	0.2
																										ENSG00000101019	0.2831	0.2831				49.1		10.7	0.6		3				14	16.1		6.5
																										ENSG00000101040	0.12	0.12				37.1	3.4		9.7	0.7		4		7.8		34.8					2.5
																										ENSG00000101052	0.2792	0.2792				45.2	1	5.3	0.6					1.4	4.1	26.7		1.1	0		3.8
																										ENSG00000101057
																										ENSG00000101079						15.3		26.5					12.7			43.5						2
																										ENSG00000101082						13.9		23.6	7.4			51.6	1.5			1.9
																										ENSG00000101084	0.1903	0.1903			6.9	26.4	10.7			8.4				9.5	4.3		4.1	17.3				8.3
																										ENSG00000101096	0.4006	0.4006			0.6	27.7		12.4	3			16.5	12.7			20		2.5			3.3	1.4
																										ENSG00000101104
																										ENSG00000101109						15.3	2.7	27.8	8			7.3	8.3	4		12.4				5	1.2	8.1
																										ENSG00000101126						26.3	1.4	6	7.5			7.7	10.4			27.8			2.5			10.4
																										ENSG00000101132						36.4		11.1		5							7.5	3.8		10.4			15.9
																										ENSG00000101138	0.1751	0.1751				54										46
																										ENSG00000101146	0.1057	0.1057				48.9								32.5		18.6
																										ENSG00000101150	0.2958	0.2958				48		0.5				6.2	15.2		13.6	8		3.9				4.5
																										ENSG00000101152					3.7			31.9		6.8		19.4	13.7						4.3		5.3	7.2	0.6
																										ENSG00000101158	0.2789	0.2789			2.1	42.5		9.1	4.3				3.1		10.6	18		4.5	1.9	1.6
																										ENSG00000101160	0.3722	0.3722				12.9		35.1	9.1			15.5	6.5			8.8		5.3		1.2		3.2
																										ENSG00000101161	0.2946	0.2946			5	24.9	1.5	13.4	1.5	4.1		7.5		5.3	13.9	5.5	0.3		3.3			3.7	1.4
																										ENSG00000101162																100
																										ENSG00000101166	0.1021	0.1021				30.4	7.8	1.9				2.9	1.9			33.1						17.5	4.5
																										ENSG00000101181											27.6									44.2
																										ENSG00000101182	0.1829	0.1829				47.9		35.6	5.4							3.2		3.1		4.9
																										ENSG00000101188								48.1					8.4		9.8	3	1	14.7
																										ENSG00000101189	0.1861	0.1861			2.9	36.5	2.8	26.9		4.2				7.1		5.6						3	4.2
																										ENSG00000101190					3.4	0.2	1.1	20.5	16.5			14.4			6.5	19.2			6.9
																										ENSG00000101191	0.1651	0.1651				38.4	2.9		2.1					1	9.3	38.3		7.9
																										ENSG00000101193	0.252	0.252			1	24	3.7	4.7	0.7	3.5	3.8		0.7	2.8	9.1	25.4	10	0.6			2.2		0.2
																										ENSG00000101194	0.1733	0.1733		4.8		35.4	3.7			4	5			29.1		7.4					0.4		2.7
																										ENSG00000101199	0.1464	0.1464		5.4		34.9	1.2	18.1		0.5	4.1	4.3		13.3	6.2		4.3					7.8
																										ENSG00000101213					2.2	16.7		23.3	12.5			12.9	6.5					15	10.9
																										ENSG00000101216	0.1079	0.1079				21.8	1.4		17.7	3.6	21.9			12.8	5.8		3.9					11
																										ENSG00000101220	0.1772	0.1772			2.8	30.8		26.5	6.9	2.2	4.1	9.9	6.6	0.8						0.2		6
																										ENSG00000101224	0.3276	0.3276				45.9				0.7			9.8		16.9	21.1		2.5		3.1
																										ENSG00000101230	0.2142	0.2142				32.7		11.4	9.1			2.2		8.9	16.9		1.4
																										ENSG00000101236	0.3094	0.3094			2.3	50.3	1.6	26.4		1.9			1.8		13.8	1.9
																										ENSG00000101246	0.2555	0.2555		8.8	1.2	34.9		17.5	0.6	4	1.2	2.5	4.1	5.2	16.4					3.6
																										ENSG00000101247	0.1052	0.1052			6.5	56.3		8.9	0.6	0.7				7.5	8.2	9		1.8				0.5
																										ENSG00000101255	0.1666	0.1666			4.5	35.8	1.7		13.8	13.5		8.4	0.6	3.1		1.8	4.4	2.6	7.9			1.9
																										ENSG00000101265	0.2286	0.2286			2.4	48.6	1.5	7.3	4.6				3.1	2.9	18.3	8.1						3.1
																										ENSG00000101266	0.2204	0.2204		11.7		49						1	3.8			33.3						1.2
																										ENSG00000101290						6.6							38.8								23.9		11.7
																										ENSG00000101294	0.2276	0.2276			5.9	15.4	2.5	29.6	8.5	2.4	0.6	14.3	1.4		3.4	5.7	0.2	3.9		4.1	0.9	1.2
																										ENSG00000101298	0.2716	0.2716		10.4		26.8			7.2			2.1	3.4		34.7
																										ENSG00000101307	0.1423	0.1423				51.1		4.7	1.6		3.7				17.7	17.6
																										ENSG00000101310					1	30.8	3.4	8.5	6.7		12.1		1.5			28	2.9	4.2				1
																										ENSG00000101335						22.4					1.9					58.9
																										ENSG00000101336	0.2396	0.2396				37.1	0.5		9.5			14.7	5.2		4.2	17.8		3.7				7.4
																										ENSG00000101337	0.25	0.25			1	49.4	1.8	35	2.9		0.7	2.2				7.1
																										ENSG00000101343	0.1333	0.1333				12.1	1.3	24.2		3.2	5.2		11.5	3.1	4	20.5			1		4.1	9.8
																										ENSG00000101346	0.2693	0.2693		0.8		55.1		8.8	13.1							18.5		3.7
																										ENSG00000101347	0.1815	0.1815		0		53.7	3.4	26.5	10.5							5.7					0.2
																										ENSG00000101350	0.1622	0.1622		9.8		45.3							16.5			20.1		8.3
																										ENSG00000101353	0.1039	0.1039		0.8	10.7	24.8					2.9		24.7			1	4	12.5
																										ENSG00000101361	0.3844	0.3844		2.5	0.4	45.8		13.6		0.7				5.5	7.2	18.4	0.2	3.6
																										ENSG00000101363	0.1219	0.1219		8.8	2.5	2.9	0.9		10.2	4	3.5	5.6	4.9	11.4	2	1.4	4.4	1.2		16.9	13.4	6.1
																										ENSG00000101365	0.292	0.292				47.5		26.4						7.3	5.7	1.3	4.6			7.2
																										ENSG00000101367						19				14.6		0.4		15.1		20.9		6.7				11.4	3.3
																										ENSG00000101384					10.8	1		36.5					6.7		29.6		11.9	3.5
																										ENSG00000101391	0.3166	0.3166		3.6		42.2		14.2		7.3					18.7	13.3		0.7
																										ENSG00000101400	0.1654	0.1654				41.2	1.2						14.7	6	19.7	8.6	3.8
																										ENSG00000101407	0.1718	0.1718				45.9										53.1			1
																										ENSG00000101412
																										ENSG00000101413						42.1										47.6					3.9	6.5
																										ENSG00000101417	0.1413	0.1413				51.9									14.8	27.6		5.8
																										ENSG00000101421								15.7	23.4			28.1				6		11		15.8
																										ENSG00000101425							15.6	28				6.1	1.7	1.8	13.9		5.2					6.9	12.9
																										ENSG00000101439	0.2337	0.2337			2.8	28.3	2.1	34.1	7.2		1.5	6.4		0.6		8.5		4.5		0.1		3.8
																										ENSG00000101442	0.3236	0.3236				43.8									11.4	37.7		7.1
																										ENSG00000101444	0.34	0.34			4.5	35	0.9	18.8	2			8.1		5.8	10.1	2.9				5.2
																										ENSG00000101445	0.3851	0.3851			1.9	37.8		0.6				12.9	12.3	2.5		22.2		0.3				1.8
																										ENSG00000101447
																										ENSG00000101452	0.2306	0.2306				50.9			1.9			1.3			6.8	36.1		1.1
																										ENSG00000101457	0.1645	0.1645		3.2		32.5		13				6.2	9.2	0.9	7.7	15.2		2.8				9.2
[truncated: 13,225 more rows]
[truncated: 28 more columns]

## Sheet: Reactome Discovery
Pathway	Replicated	DE in discovery	Discovery adjR2 > 0,1	Discovery adjR2	Discovery to validation adjR2	Basophils	CD15highCD16neg_Eosinophils	CD15lowCD16high_Neutrophils	CD15posCD14low_LDGs	CD14highCD16neg_classicalMonocytes	CD14posCD16pos_intermediateMonocytes	CD14lowCD16pos_nonclassicalMonocytes	CD56high_CD16low_NK	CD56low_CD16high_NK	CD3posCD56pos_NklikeTcells	CD19pos_Bcells	CD4pos_Tcells	CD8pos_Tcells	CD8pos_CD4pos_Tcells	CD8neg_CD4neg_Tcells	mDC1	mDC2	CD1cneg_CD141neg_mDC	pDC	HCQ	IS	DCS
R-HSA-1059683	No	No	No	0	0
R-HSA-109581	Yes	Yes	No	0.0456	0.0484			11.7		11	21.6			23	3.9	8.1			1.3	8.2	11.2
R-HSA-109582	No	No	No	0.0146	0													100
R-HSA-109606	No	No	Yes	0.2034	0	0.5		9.4	4.5	6		2.5		12.4	13.8	11.6	9.3	7.1	4.7					9.8		0.1	8.2
R-HSA-109704	Yes	Yes	Yes	0.1087	0			35.6		22.4	22.3			12.4				2.4						4.8
R-HSA-110312	Yes	Yes	Yes	0.3918	0.013		4	31.2	0.3	2.8	9.3	0.5		3.4	8.1		16	12.4		5.9							6
R-HSA-110313	No	No	No	0.07	0	6.7	0.6	10.4	5.2	6.2	4.7	1.9	6.2	12.9	3.2	0.4	22.2	3			1.6	4.6			0.2	1.7	8.2
R-HSA-110314	No	No	Yes	0.2404	0			48.4							14.7		10.8	20.3									5.8
R-HSA-110320	No	No	Yes	0.3247	0		1.4	38.3	2.4		2.3	4.7			7.8	0.2	18	9.7		6.6		0	4.3				4.3
R-HSA-110328	No	No	No	0.064	0			50.4	0.8					3.5			14.6	25.8	2.7				2.2
R-HSA-110329	No	No	No	0.064	0			50.4	0.8					3.5			14.6	25.8	2.7				2.2
R-HSA-110330	No	No	No	0.0543	0			45.1	3					5.5		2.7	9.8	28.8					5
R-HSA-110331	No	No	No	0.0543	0			45.1	3					5.5		2.7	9.8	28.8					5
R-HSA-110373	No	No	Yes	0.3273	0			40.7	3.3			2.7			6.6	14.4	10.9	10.6				3.4					7.5
R-HSA-111367	No	No	Yes	0.1008	0		2.2	33.7	5.3	22.1			4.9	5.3	3.8	4.9	8.2	2.1		3.8			3.7
R-HSA-111447	No	No	Yes	0.2639	0			51.8		11.9					15.8			6.5						6		7.9
R-HSA-111458	No	No	Yes	0.1556	0	1.5	0.9	25.9	6	12.4	0.9	3.8		2.9	2.5	10.8	10.3	2.2	1.1					9.5		3	6.4
R-HSA-111461	No	No	Yes	0.1778	0	1.8	1.5	24.5	5.6	11.7		4.5		2.5	2	11.5	11.3	3.3	1.9					9.7		2.3	5.9
R-HSA-111465	No	No	No	0.0452	0		0.9		1.2	20.4	21.9					8.3	4.3	28.4						1.5			13.2
R-HSA-111469	No	No	No	0.0578	0				1.6	4.8		14.8			11	28.3						14.3		25.1
R-HSA-111471	No	No	Yes	0.1866	0	3.7	1	19.8	5.3	10.3		5.4		2.5	2.7	13.8	10.2	5.7	2.9					9.3		1.9	5.6
R-HSA-111885	No	No	Yes	0.1126	0		1.2	4.4	8.9	6.7	10.3	6	6.2	12.2	5.3	13.7					3.1		1	3.7		8	9.3
R-HSA-111931	No	No	Yes	0.1666	0		3.1	23.8	2.1	2.5	3.3	1.7	1.4	17.1	8.3	10.7		11.3	3.5	2	3.6			5.5
R-HSA-111932	No	No	No	0	0
R-HSA-111933	No	No	No	0.0358	0			42.9			15.1		8	2.3			6.8	23.9			1
R-HSA-111996	No	No	No	0.0197	0			30.8	0.3	2	22.1			10.9				27.6			6.4
R-HSA-111997	No	No	No	0.0358	0			42.9			15.1		8	2.3			6.8	23.9			1
R-HSA-112040	No	No	No	0.0421	0		0.9	14	9.5	0.1	14.2	3.7	7.7	10.1		2.9		9.8					7.8			7.2	12.1
R-HSA-112043	No	No	No	0	0
R-HSA-112310	No	No	No	0.0807	0				25.3									59						15.7
R-HSA-112314	No	No	Yes	0.2835	0		4	21.4	3.7	12.6	5.3	4.5	4.3	6.9	0.4	8.9	3	7.1		0.2	3.3				1.8	4.8	7.7
R-HSA-112315	No	No	Yes	0.2175	0		3.1	19.4	5.8	11.3	6.8	5.6	3.3	8.5		10.1	3.3	3.5			2.8			2	1.1	5.2	8.4
R-HSA-112316	No	No	Yes	0.2875	0		3.3	25.9	4.2	14.5	6.3	4.8	2.7	6.1	0.1	7.6	4	4.9			2.5			0.4	0.7	4.8	7.2
R-HSA-112382	No	No	Yes	0.2427	0.0398			39.2	4		5.4				15.6		21.3	13.1	1.3
R-HSA-112399	No	No	Yes	0.1136	0			31.9		21.6	14.7			13.2	0.2	7.3		0.7						10.4
R-HSA-112409	No	No	No	0.0381	0				13.8	29.1						19		11.2							2.5	4.7	19.6
R-HSA-112412	No	No	Yes	0.1962	0			28.7		5.7	5.9			10.5		10.5	16							12.1	2.1		8.5
R-HSA-113418	No	No	Yes	0.1046	0.0717	1.3	0.7	27.5	9.2	13.8		2.5	0.2	9.2	3.9	4.5	15.7		3.6			5.3		2.6
R-HSA-113501	No	No	No	0	0
R-HSA-113510	No	No	No	0	0
R-HSA-114452	No	No	Yes	0.2468	0.0194	2.8		51.4		12.4				0.7	15.9			4.1					0.5	3.9		8.4
R-HSA-114508	Yes	Yes	Yes	0.3265	0			33.9			12.1		0.9	2.5	2.9		21.4	14.9	1.8	7.6				2.1
R-HSA-114604	No	No	No	0.0416	0		1.5	18.3	5.1	1.5		6.6	8.6	3		3.1	16.3			3.1			15.1	17.9
R-HSA-114608	Yes	Yes	No	0.084	0													74.1									25.9
R-HSA-1168372	No	No	Yes	0.1585	0			57.4	0.1						1		6.8	34.8
R-HSA-1169091	No	No	No	0.0874	0			38.8	6.3	23.9	9			8.1			8.2				0.8	4.9
R-HSA-1169408	No	No	No	0.0159	0						23.2	69			4.6					3.2
R-HSA-1169410	Yes	Yes	No	0.0511	0.0078						30.1	37.1		6.1	14.7					12.1
R-HSA-1170546	No	No	No	0	0
R-HSA-1181150	No	No	No	0.0982	0			1.4		5.2	28			23.6			8.4		1.1					19.8		12.4
R-HSA-1187000	No	No	Yes	0.1956	0			1.2	1.9	1.2		4.1	1.2			41.6	24.4	15.4	3.6						4.6	0.7
R-HSA-1221632	No	Yes	Yes	0.2163	0				0.5	38.6	2.3			15.2	18.6			14.6		4.9				5.2
R-HSA-1222556	No	No	Yes	0.1925	0	2.4		31.3		12.5				14.2	6.9			23.8						9
R-HSA-1226099	No	No	No	0.0611	0.1126	1.1				37.4								44.4						17.1
R-HSA-1227986	No	No	Yes	0.1621	0	2.6		13.9	4.1	9.4	4.6	1.2		15.8	6.5	11.1		12.9	3.6	5.2		2.4		6.6
R-HSA-1234174	No	No	No	0.0137	0				3.3		40.3			42.9							13.4
R-HSA-1234176	No	No	No	0.0107	0				1.9		44.2			41.5	0.2						12.2
R-HSA-1236382	No	No	Yes	0.1934	0			13.7	3.4	14.2	7	1.2		9.4	6.8	2.8		20.4	6.2	5.4		2.1		7.4
R-HSA-1236394	No	No	No	0.0967	0	10.7	0.9		4.7	21.3	6.4			11.9	4.3	10.6		7.7	7.3	6.2				7.9
R-HSA-1236974	Yes	Yes	Yes	0.1074	0			9.7	5.3	23	17.4			23	8			0.9			7.5			5.3
R-HSA-1236975	Yes	Yes	Yes	0.103	0			8	5.3	20.8	19.8			24.7	9						8.2			4.2
R-HSA-1236977	No	No	No	0	0
R-HSA-1236978	No	No	No	0.0676	0			17	7.9	17.7	22.1			20.7	3.5					1.8	8.5	0.8
R-HSA-1237044	No	No	No	0	0
R-HSA-1250196	No	No	Yes	0.1141	0	4.8	2.3	22.1	3.8	10.6		1.7	0.2	10.2	3.2	14.1	9.1		4.4	0.5		2.8		5.2			5
R-HSA-1251985	No	No	No	0.0794	0													54.9	10.7								34.4
R-HSA-1257604	Yes	Yes	Yes	0.1378	0			30.1	1.1		12.5				17		16	18.2	0				0.6				4.6
R-HSA-1266695	Yes	Yes	Yes	0.1872	0			2.6		22.6	17.2			4.2	17.6		17.4	6.8		4.5						7
R-HSA-1266738	No	No	Yes	0.2476	0.1632			29.6	0.8	5.2	14.2	3.4				7.9	15.6			4.2			2.2			9.3	7.6
R-HSA-1268020	No	No	Yes	0.2611	0		1.7	40.7	2	22.4		0.9	0.2	4.4			15.5	1.2				3.2	0.8			3.3	3.7
R-HSA-1280215	Yes	Yes	Yes	0.1573	0.0826			9.6			31.1	2.8		19.6	12.8			1.8	1.5	8.5	12.3
R-HSA-1280218	No	No	Yes	0.1828	0		2.7	42.7			21.6			1	4.7	17.2		7.8			2.4
R-HSA-1295596	No	No	Yes	0.1842	0			38.2	3.2	24	10.7			6			8.8				2.9	1			5.1
R-HSA-1296041	No	No	Yes	0.3825	0	6.2	5.6	33.3	1.6	16.6	0.2	2	0.1	3.9	3.5	0.1	9.3	7.8	3.6	1			1.3	3.9
R-HSA-1296059	No	No	Yes	0.3825	0	6.2	5.6	33.3	1.6	16.6	0.2	2	0.1	3.9	3.5	0.1	9.3	7.8	3.6	1			1.3	3.9
R-HSA-1296065	No	No	Yes	0.3825	0	6.2	5.6	33.3	1.6	16.6	0.2	2	0.1	3.9	3.5	0.1	9.3	7.8	3.6	1			1.3	3.9
R-HSA-1296071	No	No	Yes	0.3553	0	5.2	3.5	38.3	1.1	17.1		2.7		3.8	1.4	2	9.7	9	3.6			1.4		1.4
R-HSA-1296072	No	No	Yes	0.126	0		10.5	30.9		4.8	5.9		12	7.3	10.5		2.1		6.7	0.6				8.7
R-HSA-1358803	No	No	No	0	0
R-HSA-1362277	No	No	Yes	0.2193	0			52.8									4.2	42.5							0.5
R-HSA-1362300	No	No	Yes	0.2712	0			48.4						6.5	2.6			42.2						0.2
R-HSA-1362409	No	No	No	0.0352	0	14.1	3.4	37.3	2.4	21.3	1		5.4					15.1
R-HSA-1368082	No	No	No	0.09	0					23.9	18.1			23	17.2							17.8
R-HSA-1368108	No	No	Yes	0.1391	0			23.8		23	13.2			12.3	10.8	5	3.2					8.7
R-HSA-1369062	No	No	No	0.0489	0			65.1																		2.5	32.4
R-HSA-139853	No	No	No	0.0201	0						53.3					46.7
R-HSA-140534	Yes	Yes	Yes	0.3568	0		3.6	39.3	0.8		7.8			8.4	5.8	3.1	15.9	9.5	2.3	3.1	0.5
R-HSA-140837	Yes	Yes	Yes	0.1501	0			7.3	7.5	11.5	17.1			16.9	8.2			9.6	3.5	5.5				3.3	2.2	5.6	1.7
R-HSA-140875	Yes	Yes	Yes	0.1866	0.0851			36.9							0.5	5.2	14.6	31									11.9
R-HSA-140877	Yes	Yes	Yes	0.2451	0.2173			37.3							6.4	1.6	14.4	29.3									11
R-HSA-141405	No	No	No	0	0
R-HSA-141424	No	No	Yes	0.2002	0	1.4		26.8		7	7.8			8.1	10.5	2.5		24.6				0.5		10.8
R-HSA-141430	No	No	No	0	0
R-HSA-141444	No	No	Yes	0.2002	0	1.4		26.8		7	7.8			8.1	10.5	2.5		24.6				0.5		10.8
R-HSA-1428517	No	No	Yes	0.1481	0			41.6	5.7	30.2				2.4			2.7						3.9			8.8	4.8
R-HSA-1430728	No	No	No	0.0508	0			25.8		36.9		3.6			22.1			5.1					6.6
R-HSA-1433557	No	No	No	0.0466	0					37.7								62.3
R-HSA-1433559	Yes	Yes	Yes	0.188	0			46.8							4		10.3	36.1		2.8
R-HSA-1442490	Yes	Yes	Yes	0.2124	0			40.8						3.8	14.1		6.8	21.8		6.7				6
R-HSA-1445148	No	No	No	0.0659	0		5		4.1	11.4		19.4			2.3	7.2	9.6							17.5			23.6
R-HSA-1474151	No	No	Yes	0.2403	0			48.3				11.1			9.3			31.3
R-HSA-1474165	Yes	Yes	Yes	0.2467	0			0.4		39.3				15.4	19			14		4.9				7
R-HSA-1474228	Yes	Yes	Yes	0.1985	0			6.2		28.3				1.2	4.4		4.6	31		7.1				7.8		1.5	7.8
R-HSA-1474244	Yes	Yes	Yes	0.1582	0					29.5					3.3			47.3						7.2			12.7
R-HSA-1474290	No	Yes	Yes	0.1773	0		3.1	18.4		33.4		7.5		6.3	6.9	0.3		6		5.1			0.9	6.3	0.2	5.7
R-HSA-1480926	No	No	No	0	0
R-HSA-1482788	No	No	Yes	0.3641	0	0.4	4.3	33.6	1.5	11.6	4.7			2.9	2.5		18.5	5.3	1.6	1.8			2.4			3.9	5.2
R-HSA-1482801	No	No	Yes	0.1929	0	0	4.6	29.9	0.9	20.4		1.4	0.9	3.8		2.3	13			1.2	1.4			4.9	0.6	6	8.7
R-HSA-1482839	No	No	Yes	0.2977	0.1939		2.8	41.1		0.4	5.5		3	3	6.9	5.5	18.3	4.5		2.6						2.7	3.8
R-HSA-1483166	No	No	Yes	0.1128	0		3	15.9						22	5		20.4			2			5		7.8	3.8	15.1
R-HSA-1483191	No	No	No	0	0
R-HSA-1483206	No	No	Yes	0.2957	0	3.3	3.7	39.2	1.3	7					0.9		12.6	12.5	1.1	0.5	1.9				2.3	7	6.7
R-HSA-1483213	No	No	No	0.0739	0	7.4		51.1		16.7	1.5		8.1					15.2
R-HSA-1483249	Yes	Yes	No	0	0
R-HSA-1483255	No	No	Yes	0.1246	0.017			4.2	0.8	22.5	10.4	0.4	4.5	16	10.3			6.7				13.6		2.6		7.3	0.8
R-HSA-1483257	No	No	Yes	0.3087	0		2.7	28	3	17.1	4.5	1.7	2.2	6.6	0.6	1.6	10.1	0.7		0.5	1.8		2.5	2.9	0.1	7.8	5.7
R-HSA-1489509	No	No	Yes	0.1015	0			35.6	1.2	0.8	15.2		3.8	3.8			15.3	22.6			1.5
R-HSA-1500620	Yes	Yes	Yes	0.2332	0					40.6				14.2	17.5			18.5		3.2				6.1
R-HSA-1500931	No	No	No	0.0673	0	8.7		17.6	9		29.1		1.4	18.7	10.3			4.5		0.7
R-HSA-1502540	No	No	Yes	0.1187	0.0484			39.7										23.4	9.3					22.6		5.1
R-HSA-1538133	No	No	Yes	0.2512	0			51.7									4.4	43.9
R-HSA-156580	No	No	No	0.0862	0			42.6		36.6	3.8				8.7		2.6							0.6		5.1
R-HSA-156581	No	No	Yes	0.3607	0			50.8		7.9	1.2						13.5	26.6
R-HSA-156584	No	No	Yes	0.2662	0.2974	1.3		38.1				1.6			8.5	15.6	3.5	10.5	1.2			4.9		4.5			10.2
R-HSA-156590	No	No	Yes	0.1804	0		0.9	33.1	1.8	29.7	2.8			8.5	4.5		9			4.4	1	2.6		1.7
R-HSA-1566948	Yes	Yes	Yes	0.1852	0					35					3.7	2.5		44.2								1.6	13
R-HSA-156711	No	No	Yes	0.1041	0	4.8		25	1	10.5	7.7			11.2	8.9			15.8		5.2		5.5		4.4
R-HSA-156827	No	No	Yes	0.2762	0			42.2		15.8		6				8.8	12.6			1.2			1.6			3.7	8.1
R-HSA-156842	No	No	Yes	0.2269	0.1285			40.5		13.2	0.9	6.2				11.2	11.6			1.3			2			3.6	9.4
R-HSA-156902	No	No	Yes	0.2276	0.1145			40.7		13.3	0.8	6.1				11	11.8			1.3			1.8			3.6	9.5
R-HSA-157118	Yes	Yes	No	0.0086	0											100
R-HSA-157579	No	No	No	0	0
R-HSA-157858	No	No	No	0.0487	0													60.3					6	17.3			16.5
R-HSA-15869	Yes	Yes	Yes	0.2658	0	0.4		19.1		17.2	6.4			12.3	8.6			25.4		5.5			5.1
R-HSA-1592230	No	No	Yes	0.3066	0	2.3	5.2	34.4	2.8	13.9	0.1	2.5	2.1		5.7		8.1	6.2	2.2	0.7			1	2.7	2.6	4.5	3
R-HSA-159227	Yes	Yes	Yes	0.1833	0			35		1.7	9.5			1.8	4.7		10.5	28.5		6.3			1.1	0.9
R-HSA-159230	Yes	Yes	Yes	0.1862	0			34.7		1.5	9.8			2.1	5.4		9.8	28.8		6.1			0.6	1.3
R-HSA-159231	Yes	Yes	Yes	0.203	0			38.7			8.1			0.8	4.1		12.4	28.7		5.6				1.6
R-HSA-159234	No	No	Yes	0.2049	0			37.9			8.4	0.2		1.4	4.8		11.5	28.2		5.5				2
R-HSA-159236	Yes	Yes	Yes	0.2755	0			45								0	13.5	35.2		6.4
R-HSA-1592389	Yes	Yes	Yes	0.2532	0	1.1		45.7						6.4	7.5		2.1	27.6		2.8				6.8
R-HSA-1606322	No	No	No	0.076	0	0.9	6.5	17	0.2		6.5		2.7	9.9	9.2	4.8		11.2	6.2		14.5		6.9	3.5
R-HSA-1614558	Yes	Yes	Yes	0.2174	0.282		0.4	30.8	2.8		13.1			16.6	13.2	1.3		8		4.3	3.4			6.2
R-HSA-1614635	Yes	Yes	Yes	0.1373	0	2.2	1.3	12.4	3.6	1.6	13.5	5.2		13.1	10.4	3.9	11.8	6.3	2.4	4.7	3.1			4.6
R-HSA-162582	No	No	Yes	0.203	0	1.8	2.3	27.1	2.2	22.9	11.6	2.1	4.1	9.6	3	6.1	5.1			1.4		0.3	0.3
R-HSA-162587	No	No	Yes	0.2935	0			41.6	2.2		2.3	4			7.6		20.7	17.5		0.4							3.7
R-HSA-162588	No	No	No	0	0
R-HSA-162594	No	No	Yes	0.3403	0		1.5	47.7		11.8		0			8.9		12.4	16.1				1.5
R-HSA-162599	No	No	Yes	0.2849	0			37.2	4.1		6.1	3.5			6.5		21.5	15.7		1.3							4.3
R-HSA-162658	No	No	Yes	0.2508	0.0401		1.4	49.3				3.5				3.1	11.6	23.3		7.7
R-HSA-162710	No	No	Yes	0.1613	0		2.7	25.7		7.4	1.7	1.6	10.6	0.6	1.6	17.9	1.1	8.6	1.8	1.2			0.6	2.4	6.4	3.8	4.3
R-HSA-162906	No	No	Yes	0.2851	0		2	40.8	4	11		1.4		4	4.3		15.5	13				4
R-HSA-162909	No	No	Yes	0.3453	0		2.2	44.4	2	12.6		0.7		2.8	2.8		14.2	15.1				3.3
R-HSA-1630316	No	No	Yes	0.2983	0			48.2							6.1		27.5	11.6		0.7							6
R-HSA-163125	Yes	Yes	Yes	0.3096	0	4		50.1			0.3			2.4	10.3		12.6	18.9		1.3
R-HSA-163200	No	No	Yes	0.1133	0.0939			40.9	7.5	29.7				0.7			1						3.7			10.2	6.3
R-HSA-163210	No	No	Yes	0.1756	0.0965			43.5	5.5	29						1	3.9						3.4			8.3	5.4
R-HSA-1632852	No	No	No	0.0217	0			23.8	18.1					14.6				23.1					17.1	3.3
R-HSA-163359	No	No	Yes	0.1704	0	2.7		22.6	3	11.6		0.3	0.8	17.5		10.2	19.2	5.3		1.9		2.9		2
R-HSA-163560	No	No	No	0	0
R-HSA-163615	No	No	Yes	0.1304	0	2.2	2.3	18.1	3.2	3.4	3.6	2.5	4.2	18.8	5.8	13.9	0.9	6.8	4.1	3.6	3.6			2.9
R-HSA-163685	No	No	Yes	0.1589	0.0876			28.3	5.4	5.9	3.7		3	11.2		5.7	20.6	11.6				4.5
R-HSA-1638074	Yes	Yes	Yes	0.1916	0			45.8							9.6		31.7	12.9
R-HSA-1638091	Yes	Yes	Yes	0.1195	0			17.6		19.9					1		13.2	40.4		0.4							7.6
R-HSA-163841	No	No	Yes	0.1813	0		5	30.9	1.5	24.8		7.5	1.7	2.5		3.9	6.3	2.8		1.1		4.6		1.8	0.4	2.2	2.9
R-HSA-1640170	No	No	Yes	0.3046	0			38.9		6.9				5	12.1			27.5						9.7
R-HSA-1643685	No	No	Yes	0.3091	0		1.7	36.7		19.5	5.5	3.9					14.6	1.7		1.7			2.8		0.7	5.5	5.6
R-HSA-1643713	No	No	Yes	0.1803	0			7.4	3.5	19.3	7.1	0.8		10.4	6.3	3.7		19.8	5.9	5.7		2.4		7.6
R-HSA-164378	No	No	No	0.0912	0	4.7	2.4	11.8	4	4.5	3.8	2	7.1	18.3	3.1	13.2	6.6	4.1	4.6	5.5	3.4			0.9
R-HSA-164938	No	No	Yes	0.3715	0		5.5	36.9	0.2	16.3		2.3		6.3	3.2		11.3	11.8	0.8	1.3		3.9		0.2
R-HSA-164952	No	No	Yes	0.3575	0		3.5	44.8		13		3.4			4		9.5	16.9				4.3		0.7
R-HSA-165054	Yes	Yes	Yes	0.2342	0			40.4			7.5			1.6	4.9		11.4	27.7		4.5				2
R-HSA-1650814	No	No	Yes	0.1745	0		3.2	32.1	0.1	40.3	0.7	2.7	2.4	1.3				5.1		4.9			4.2	3
R-HSA-165159	No	No	No	0	0
R-HSA-1655829	No	No	No	0	0
R-HSA-166016	Yes	Yes	Yes	0.3298	0	0.5	3.5	34.9	5.8		2				7		21.5	9.5				2.1		3.1	2.7		7.4
R-HSA-1660499	No	No	Yes	0.1801	0			14.3	1.8	21.9	9.8	3.2	4	15.5	4.9	6.9	0.3	4.8				2.9	3.9	5.8
R-HSA-1660514	No	Yes	Yes	0.1163	0	10	3.9	23.4		1.9	8			9.9	10.2			12.4		5.8			1.9	6.4		6.1
R-HSA-1660516	No	No	No	0.0687	0	6.5			0.1	28.9	0.1			14.2	3.6			21.8				4.9		11.3		8.4
R-HSA-1660517	No	No	No	0	0
R-HSA-166058	Yes	Yes	Yes	0.3264	0		3.5	40.4	3.9						9.7		19.4	14				1.6			0.9		6.6
R-HSA-1660661	No	No	No	0.0428	0			16.9		0.4		11.2				5	9.1	2	7.5	7.8		5.2		13.5			21.3
R-HSA-1660662	No	No	Yes	0.1951	0		1.9	31.5		41.7		2.1		2				11		4.4		1.4		0.1	4
R-HSA-166166	Yes	Yes	Yes	0.2936	0		3.9	37.4	5.7						6.3		20.8	10.1	0.8	0.2				3.8	2.5	0.8	7.7
R-HSA-166208	No	Yes	No	0.077	0		2.1	25.3	0.7	35.8		4.6		11	3.9		1.1	4		1.7			9.7
R-HSA-166520	No	No	No	0.0842	0	9.4		4.4		5.5	10.7			16.2	6.6	13.2	10.6	7.2	1.5	2.1		0.3		4.3	3.4		4.7
R-HSA-166658	No	No	No	0.0405	0						10.9				23.6	27.2		38.3
R-HSA-166663	No	No	No	0	0
R-HSA-166786	No	No	No	0	0
R-HSA-167044	No	No	Yes	0.2234	0	4.4		34.4	1.7	16.7		8.5	2.2		1.1	12.1	11.5							7.3
R-HSA-167152	No	No	Yes	0.2163	0			44.6	3.5			1.1			10.8		22.7	15.1	2
R-HSA-167158	No	No	Yes	0.1046	0.0717	1.3	0.7	27.5	9.2	13.8		2.5	0.2	9.2	3.9	4.5	15.7		3.6			5.3		2.6
R-HSA-167160	No	No	Yes	0.215	0	1.1	2.6	32	5	9.1	4.2	2	0	3.7	7.1	5.2	17.6	3.1	2	1.4		1.5		2.2
R-HSA-167161	No	No	No	0.0652	0	4		11.9	9.2	9.8	12.1		6	4.9	11.7		4.5	15.9		1.5			1.2	7.4
R-HSA-167162	No	No	No	0.0652	0	4		11.9	9.2	9.8	12.1		6	4.9	11.7		4.5	15.9		1.5			1.2	7.4
R-HSA-167169	No	No	Yes	0.1511	0			39.2	6.7	3		3			8.4	4.9	20.3	3.6	5.2			5.8
R-HSA-167172	No	No	Yes	0.1781	0.0918			38.6	7.4		3.3	1.2			13.8		22.8	10.3	2.6
R-HSA-167200	No	No	Yes	0.1511	0			39.2	6.7	3		3			8.4	4.9	20.3	3.6	5.2			5.8
R-HSA-167238	No	No	Yes	0.1695	0			41.6	4.2			2.6			7.7	5.8	21.3	5.6	6.5			4.7
R-HSA-167242	No	No	Yes	0.1024	0.0863	0.4		27.6	8.9	13.9		3.2		9.1	2.1	6	14.5		4.2			4.7		5.4
R-HSA-167243	No	No	Yes	0.1695	0			41.6	4.2			2.6			7.7	5.8	21.3	5.6	6.5			4.7
R-HSA-167246	No	No	Yes	0.1511	0			39.2	6.7	3		3			8.4	4.9	20.3	3.6	5.2			5.8
R-HSA-167287	No	No	Yes	0.2055	0			40.9	4.3			3			11.2	2.4	22.1	8.1	5.6			2.4
R-HSA-167290	No	No	Yes	0.2055	0			40.9	4.3			3			11.2	2.4	22.1	8.1	5.6			2.4
R-HSA-1679131	No	No	Yes	0.3076	0		1.4	9.2		36.4	6.9			12.3	5.5		0.6	16	2.1	5.4				4.2
R-HSA-168138	Yes	Yes	Yes	0.2959	0		4.4	41.3	3.5						8.3		21.7	12.7				0.2		1.2	0.6		6.3
R-HSA-168142	No	No	Yes	0.2676	0		4.1	40.9	3.4						6.2		23.4	9.9						3.7	0.1		8.3
R-HSA-168164	No	Yes	Yes	0.2395	0		3	38.1	6.3						3.9		22	8.5						5.4	2.2	0.1	10.5
R-HSA-168176	No	No	Yes	0.2676	0		4.1	40.9	3.4						6.2		23.4	9.9						3.7	0.1		8.3
R-HSA-168179	Yes	Yes	Yes	0.3264	0		3.5	40.4	3.9						9.7		19.4	14				1.6			0.9		6.6
R-HSA-168181	Yes	Yes	Yes	0.301	0		4	42.3	3.2						8.3		21.7	13.7						0.2	0.2		6.3
R-HSA-168188	Yes	Yes	Yes	0.3264	0		3.5	40.4	3.9						9.7		19.4	14				1.6			0.9		6.6
R-HSA-168249	Yes	Yes	Yes	0.2534	0			30.2		6.6	8.7			8.2	9.9		9.6	19.4		1.5	0			5.9
R-HSA-168253	No	No	Yes	0.1251	0.099	5.7		32.5		11.4	2.5			0.3			10.4	32.3									4.8
R-HSA-168254	No	No	Yes	0.2714	0.0805			40.1		12.8	2.4	4.7				8.1	14.9			2.2			1.6			3.9	9.2
R-HSA-168255	No	No	Yes	0.2628	0.0688			40.7		11.9	2.2	5.4				8.2	15.6			2.9			1.3			2.9	9
R-HSA-168256	Yes	Yes	Yes	0.2306	0.1999			25.3			20.8			11.2	8.6		10.8	12.4		2.4	3.4			5.2
R-HSA-168271	No	No	Yes	0.15	0	4.1		17.2		15.5	12.5			6.7	4.6		2.6	27.3		6.8			0.4	2.1
R-HSA-168273	No	No	Yes	0.2404	0.1159			42.1		10.1	1	6.4				9.6	16.2			2.8			0.8			1.8	9.3
R-HSA-168274	No	No	Yes	0.2275	0			34.8		2.4	12.7			2.5	6.6		12.6	23.3		5.1
R-HSA-168276	No	No	No	0.0758	0.0399	3.7		14.4		29				1.3				46.5						5.2
R-HSA-168325	Yes	Yes	Yes	0.2271	0.0684	1.7		30.7		3.8	12.9	0.5		4.2	6.7		11.6	21.3		6.5
R-HSA-168333	Yes	Yes	Yes	0.2183	0			39.6		0.1	7.8			2.6	5.1		9.3	28.1		4.5				2.9
R-HSA-168638	No	No	No	0.0304	0			4.3	3.6	21.3		13.9		0.8				33.8						22.3
R-HSA-168643	No	No	Yes	0.1646	0		4.5	30.1	1.8			7		0.3	16.6		11.5	3.5	8.5						6.2		9.8
R-HSA-168898	Yes	Yes	Yes	0.3387	0	1.1	3.6	33.5	5.7		3.5				8		20.7	10.1		0.1		1.6		2.8	2.6		6.8
R-HSA-168927	No	No	No	0.0066	0				28.6															71.4
R-HSA-168928	Yes	Yes	No	0.075	0			28			11.6	25.1		9.1	10.2	3.7	0		5.9	6.5
R-HSA-169893	No	No	Yes	0.1004	0	7.1		8.6	2.7	10.5	10.3			16.6	6.7	2.2	17.9	7.8	3.1	2.7	2.4			1.5
R-HSA-169911	No	No	No	0.0668	0			32.7	6.5	25.1	13.4			13.9	0.3						2.7	5.3
R-HSA-170670	No	No	No	0.0124	0		0.9	22.3	6.9			15.8		28.7	2.1	9.2		3.2					10.9
R-HSA-170822	Yes	Yes	Yes	0.1784	0	1.9		25.1		8.8	12.8	0.1		5.4	5.4		8.3	23.6		6.6			0.8	1.2
R-HSA-170834	Yes	Yes	Yes	0.2026	0	2.6	0.7	10	4.3	25.8	11.5		6.1	13	6.4	0.2	0.7	3.6	2.9	1.7	1.2	0.8	5.1	3.4
R-HSA-170968	No	No	Yes	0.1804	0	0.1	0.7		3.9	13.8	18.2			23.2	13.9		9.4	8.3		1.6	3.7			3.3
R-HSA-170984	No	No	No	0.0682	0	6.9	2.7	21.7	0.4	12.6	4.1		0.7	10.5	3.8	5.8	17.3	3.7	3.4			3.4		3
R-HSA-171007	Yes	Yes	Yes	0.3076	0	5.9	2.5	29.7	1.6	14.5	1.9	4.7	3.2	1.4	6.9	3.7	17.4	3.6		0.9				2.2
R-HSA-171306	No	No	No	0.0548	0			45.2	3					5.4		2.7	10	28.8					4.9
R-HSA-173623	No	No	No	0	0
R-HSA-174048	No	No	No	0.0229	0			51.8										24.3						23.9
R-HSA-174084	No	No	No	0.0581	0			31.8	4.2	22.3	17.8			14.3								7.5				2.1
R-HSA-174113	No	No	No	0.0774	0			34.5	6.5	25.3	13.3			11.9								8.6
R-HSA-174143	No	No	No	0.0736	0			37.2	4.1	21.8	15.8			10.6			4.4					6.1
R-HSA-174154	No	No	No	0.0615	0			34	4.4	22.6	18.2			13.9								6.9
R-HSA-174178	No	No	No	0.0615	0			33.9	4.5	22.6	18.1			14								7
R-HSA-174184	No	No	No	0.0638	0			35.6	4.2	22.9	18.1			12.5								6.8
R-HSA-174403	No	No	Yes	0.2535	0.0474			34.6	4.3	16.5	10.2			6.9	1.8	5.2		3.8	3.6					3.6	0.1	6.7	2.7
R-HSA-174411	No	No	No	0.0813	0			40.6	10.6	2.1		0.2			19.5	9.9	10.9						6.3
R-HSA-174414	No	No	Yes	0.2928	0		2.2	35.2	6.1			3.1			11.6	5	19.3	4.6				5.5					7.4
R-HSA-174417	No	No	Yes	0.3417	0		2.7	36.7	5.1			3.1			11.8	4.1	16.3	8.6		0.8		3.8					7
R-HSA-174437	No	No	Yes	0.2882	0		2.3	34.9	6.4			3.4			11.6	5.3	18.4	4.8				5.5					7.4
R-HSA-174490	No	No	No	0	0
R-HSA-174495	No	No	No	0	0
R-HSA-174824	No	No	Yes	0.1208	0		6.1	29.2	9.5	29.4		1.7					5.4		4.5	4.1		0.8		4.6	0.6	4.4
R-HSA-175474	No	No	No	0	0
R-HSA-176033	Yes	Yes	Yes	0.2943	0		0.2	34.8			11.1	2.1			5.2		17.7	20.4		4							4.5
R-HSA-176187	Yes	Yes	Yes	0.3533	0			44.4	0.2						10.4		15.8	22.9		0.2						2	4.1
R-HSA-176407	No	No	No	0.0176	0																			100
R-HSA-176408	No	No	No	0.0674	0			37.3	4.3	22.9	17.1			10.6			1.2					6.6
R-HSA-176409	No	No	No	0.0638	0			35.6	4.2	22.8	18.1			12.5								6.8
R-HSA-176412	No	No	No	0	0
R-HSA-176814	No	No	No	0.0638	0			35.6	4.2	22.8	18.1			12.5								6.8
R-HSA-176974	No	No	Yes	0.2196	0	0.9	0.7	39.6	4.2			1.4			5.2		20.9	8.2	5.4	3.6		6.5				2.1	1.4
R-HSA-177243	Yes	Yes	Yes	0.2148	0.0385			36		1.2	9			1.5	3.8		11.8	26		4.9				1.7			4.1
R-HSA-177504	No	No	Yes	0.1761	0		9	39.2	6.6	26.8		4.2					7.4					0.8		6.1
R-HSA-177929	No	No	Yes	0.1316	0	2.8	0.3	0.7	4.2	20.2	9.3	4.3		15	7.6	8.1		10.9	4.8	3.5		1.5		6.9
R-HSA-1793185	No	No	Yes	0.2438	0			47.5	2.7						3.3	4	26.1	6.3	2.3	0.3		2.7					4.6
R-HSA-179409	No	No	No	0.0527	0			50.8										39.4						9.8
R-HSA-179419	No	No	No	0.0638	0			35.6	4.2	22.9	18.1			12.5								6.8
R-HSA-1799339	No	No	Yes	0.2258	0.0501			43.1		14.6		5.7				9.6	12.9			0.5			1.7			2.9	9
R-HSA-180024	No	No	Yes	0.1856	0			3.2	2.3	16.1	2.1		5.6	17.3	14.6	14	5.8	1.9	0.6					16.5
R-HSA-180292	No	No	Yes	0.161	0	4.7			3.9	32.3	8.5			19.6	12.3			8.5		1.8				8.3
R-HSA-180336	No	No	Yes	0.1299	0	3.2	0.2	10.5	4	13.6		5.1	1.8	7.1	0.7	10.7	7.1	11.6	5.5					11.3	2.6	0.2	4.9
R-HSA-180534	No	No	No	0.0868	0			36.6	4.9	27.5	11.7			10.9			0.2					8.2
R-HSA-180585	No	No	No	0.0619	0			33.8	6.5	24.1	14.7			12.9							1	7
R-HSA-180746	Yes	Yes	Yes	0.2466	0.1184			38.4			8.1				2.7		15	24.9		5				0.2			5.6
R-HSA-180786	No	No	Yes	0.3049	0			38	6.4			3.3			9.6	4.4	16.2	10.8				4.3					6.9
R-HSA-180910	Yes	Yes	Yes	0.211	0	0.2		26.2		7.3	13.8			3.4	6.5		12.6	24.7		3.7				1.7
R-HSA-1810476	No	No	No	0.0767	0	1.8	7.5	7.7		10.1	2.8			10.7	12.8	13		11.6	7.3		6.1			8.8
R-HSA-181429	No	No	Yes	0.1773	0	16.5	0.9	19.5		14.8	10.7		0.6		3.5		16.8		14.2	1.7			1
R-HSA-181430	No	No	Yes	0.1783	0	16.3	0.8	20.1		15.1	10.6		0.5		3.3		16.5		14.2	1.8			0.8
R-HSA-181438	Yes	Yes	Yes	0.3264	0		3.5	40.4	3.9						9.7		19.4	14				1.6			0.9		6.6
R-HSA-182971	No	No	Yes	0.1857	0		1.5	28.2		23.8	4.8			12.6			15.3			3.9		8.1					1.8
R-HSA-1834941	No	No	No	0.0942	0			40.3	3.8								10.6	27.1	10.4					7.8
R-HSA-1834949	No	No	No	0	0
R-HSA-1839117	No	No	No	0	0
R-HSA-1839124	No	No	No	0	0
R-HSA-1839126	No	No	Yes	0.1842	0.2196			43.9	4.8	10		3.6			8.1	4.6	14.2	9.2				1.7
R-HSA-1852241	No	No	Yes	0.2554	0	6.9		43.9	3.3	7.1	0.6	1.6			6.8		6	10.7		2.5			1.1	3.5	1.1	4.9
R-HSA-1855183	No	No	Yes	0.1197	0				2.3	27.3	10			18.7	4.5	1.1		26.7			5			4.5
R-HSA-1855204	No	No	No	0.0645	0						28.2		34.7			2.1			10.3					24.8
R-HSA-186712	No	No	No	0.0894	0			24.3	1	26.4	25.3			8.6	7.4	3.4				1.3		2.3
R-HSA-186763	No	No	No	0.0545	0	1				39.8				5.1	5			36.5		1.2				11.4
R-HSA-186797	No	No	No	0.0403	0	0.3		7.4		26.1	2.6			21.9	5.5	11.9		6.6		4.5				13.3
R-HSA-187037	No	No	No	0.081	0	8.1		20.7		1.8	10.5			12.8	1.2	14.1	15.3					3		3.4	1		8.1
R-HSA-187577	No	No	No	0.0713	0			33.3	6.3	24.7	13.8			12.4			0.7					8.9
R-HSA-187687	No	No	Yes	0.1482	0	8.7	0.6	23.4	2.6	16	1.7	0.2		10.5		5.9	20.2	5.3	0.2	0.6		0.3		3.6
R-HSA-189200	No	No	Yes	0.2179	0.0849		1.3	47.5		20.5		2.1			7.8	0.6	19			1.2		0.1
R-HSA-189445	No	No	No	0.0169	0	7.9									14.8			24.9	16.3					36.1
R-HSA-189451	No	No	No	0.0051	0	39.4	5.7			3.8									38.2					12.8
R-HSA-190236	Yes	Yes	Yes	0.2731	0			30.2	0.2	5.3	6.9			11.1	10.9			25		3			0.4	7
R-HSA-190828	No	No	No	0.0483	0													59.8					6.3	17.1			16.8
R-HSA-190840	No	No	No	0.0458	0			8.6										57.1					4.2	13.8			16.3
R-HSA-190861	No	No	No	0.0458	0			8.6										57.1					4.2	13.8			16.3
R-HSA-190872	No	No	No	0.0458	0			8.6										57.1					4.2	13.8			16.3
R-HSA-190873	No	No	No	0	0
R-HSA-1912408	No	No	Yes	0.1495	0			47.9		31.6	10.9					5						4.6
R-HSA-1912420	No	No	No	0.0058	0						100
R-HSA-1912422	No	No	Yes	0.1166	0			42.1		27.5	15.8			2.3		4.6						5.5					2.1
R-HSA-191273	No	No	Yes	0.226	0	7.2		18.8	4.8	8	2.6	0.7	2	9.6	4.5	3.7	17	5.2	2.1	0.9			6.1	6.8
R-HSA-191859	No	No	Yes	0.2752	0			38.8	0.4		6.1	3.6	1.1		5		18	18.8		3.2							5
R-HSA-192105	No	No	No	0.0315	0		1.1	66.5			5.1					4.6	20.9						1.9
R-HSA-192823	No	No	Yes	0.2142	0.1084			41.6		12.7		6.5				11.5	11.8			1.1			1.7			3.3	9.7
R-HSA-193368	No	No	No	0	0
R-HSA-193639	No	No	No	0.0475	0					22				8.4	21.4	4.5		8.4				16.3		19.1
R-HSA-193648	No	No	No	0	0
R-HSA-193692	Yes	Yes	Yes	0.1209	0.1721		6.9	7.2		10.3	11.1	4.8		19.1	11.9			11.6		1.3	7.1			3.6			5
R-HSA-193704	No	No	No	0.0639	0.056			2.9		13.9								39.7						20.3			23.2
R-HSA-194068	No	No	No	0.0396	0			64.3			5.4					7.9	20.3						2.1
R-HSA-194138	No	No	No	0.0325	0				6.3	15.8	14.2	4		15	2.5	5.8		21.8		6.5			8
R-HSA-194315	No	No	Yes	0.1222	0	1.2	3	23.6	2.6	11.7	7.2	4.5	6.1	5.2	2.6	2.6	19.9							0.7	0.7		8.3
R-HSA-194441	No	No	Yes	0.2752	0			38.8	0.4		6.1	3.6	1.1		5		18	18.8		3.2							5
R-HSA-194840	No	No	Yes	0.1082	0			45.7			13.3		0.1					25.2						15.7
R-HSA-195253	No	No	No	0.0843	0			32.2						4.6			25.3					16.7				9.3	11.9
R-HSA-195258	No	No	No	0.0703	0	3.8	1	15.2	0.9			7	3.5	3.1	7.1	18.9	21.8			2.1							15.6
R-HSA-195721	No	No	No	0.0006	0					53.1																	46.9
R-HSA-196025	No	No	No	0	0
R-HSA-196071	No	No	Yes	0.1063	0			55.3					0.6			9.1	5.4	22.1		7.5
R-HSA-196299	No	No	Yes	0.3183	0		1.4	29.7	4.4	20.2	0.5	0.8		7.3	0.7	7.2	13.8	7.1	0.1		1.8			5.1
R-HSA-1963640	No	No	No	0	0
R-HSA-1963642	Yes	Yes	Yes	0.1582	0					22.5	10			17.4	16.5	3.8		8.5		0.8		1		19.4
R-HSA-196741	No	No	No	0.0306	0													61.9						38.1
R-HSA-196757	Yes	Yes	Yes	0.1624	0			42.7						17.8	26.3			13.1
R-HSA-196780	No	No	Yes	0.1394	0			46.6			3.5						4.8	45.1
R-HSA-196807	No	No	Yes	0.2234	0.0325		3.7	34.2		11.4	11.8	3.6	0.9	6.8	11.1	4.6	10.3		0	0.9	0.7
R-HSA-196849	No	No	Yes	0.3244	0.0735			42.5	0.8	8.1	5.9	4.7		2.5	12.2	7.5	11.7		0.1	3.6				0.4
R-HSA-196854	Yes	Yes	Yes	0.3256	0.2176			37.2	2.9		9.2	3.1		2.8	14	7.1	17.7		2	4.1
R-HSA-1971475	No	No	No	0	0
R-HSA-197264	No	No	No	0.0727	0			31.4		7.6	15.3	18.5				26.8	0.4
R-HSA-1980143	No	No	No	0.0911	0			41		24.3	28.2			3.6								2.9
R-HSA-1980145	No	No	No	0	0
R-HSA-198203	No	No	Yes	0.2239	0			25.8		1.4	20.9			17.3		12	5.2	2.2						7.5	2.5		5.2
R-HSA-198323	No	No	No	0.0377	0			42.3			57.7
R-HSA-198725	No	No	Yes	0.2596	0.3167	2.2	3.2	40.1	2.1								28.7	10.2			4.1			2.2			7.3
R-HSA-198753	Yes	Yes	Yes	0.2474	0	3.1	5.6	35.3	3.7		1.5				4.4		24	11.7		0.3	3.9						6.4
R-HSA-198933	No	No	No	0	0
R-HSA-1989781	No	No	No	0	0
R-HSA-199220	No	No	Yes	0.2152	0			47.9				3.3			1.5	8.9	23.5					0.7		8.8			5.4
R-HSA-199418	No	No	Yes	0.2784	0			23.4		25.7	7.9		2.2	11.1	10.1	10.5		3						6.2
R-HSA-199977	No	No	No	0.0212	0		1.2	78.5	7.9			10.1			2.3
R-HSA-199991	No	No	No	0.0741	0	24									0.1	35.3								12.7			28
R-HSA-199992	No	No	Yes	0.217	0			38.6		38.9	3.3		0.5	1.1	3.5			14.1
R-HSA-200425	Yes	Yes	Yes	0.1257	0	1.4		16.5	1.9	17.7				7.1	12.4			17.3	2.2	7.7				15.9
R-HSA-201451	No	No	Yes	0.2356	0			36.9	7	23.8		2.5		2.9	0.5	7.2	7.2					3.1		9
R-HSA-201681	No	No	No	0.0356	0			36.4		1.4		3.6					14.3	12.5			7.4	2				2.9	19.5
R-HSA-201722	No	No	Yes	0.1425	0.166	6				26.4	9.2	5.9					33.2			4.5		1.9		3		2.5	7.3
R-HSA-202040	No	No	Yes	0.3246	0.0001			45	0.6	12.2		1.6		2.6		4.1	17.6	13.5						2.8
R-HSA-202131	No	No	Yes	0.1115	0		3	26.3	1.3		9.2	0.4	7.1		9.8		26					9.7			5.3		2
R-HSA-2022090	No	Yes	Yes	0.115	0		1.9			18.9		12.8		9.3	17.3			2.8	7.3	7.1				8	5.5	9.2
R-HSA-2022377	Yes	Yes	Yes	0.2107	0		4.9			34.3				8.9	6.1		3.8	10.4		10.6				9.4		5	6.5
R-HSA-2022854	No	No	Yes	0.3493	0		4	43.5		26.3	0.6	1.2		6.4	2.2		15.3	0.5
R-HSA-2022870	No	No	Yes	0.2931	0			49.6	2	12.4	0.6				7.8	0.4	21.1	2.1	0.5			3.5
R-HSA-2022928	Yes	Yes	Yes	0.1585	0			38.5						2.1	11.6	5.7	16.9	18.1		7.2
R-HSA-202403	No	No	Yes	0.2125	0			52.6							2.6	4	17.8	18.2				4.9
R-HSA-2024096	No	No	Yes	0.1594	0.0978					39.4			1.7				4.2	37.1							10		7.5
R-HSA-202424	No	No	Yes	0.1856	0			45.2	4.1	13.7	2.4			2.3	4.2	5.4	10.1	7.2				5.3
R-HSA-202427	No	No	Yes	0.3506	0			45.9	1.6						12.4	17.6		13.3	0.3			2.6					6.4
R-HSA-202430	No	No	Yes	0.3236	0			43.1	3	0.8					11	14.7	3.5	10.5	1.9			4.3					7.2
R-HSA-202433	No	No	Yes	0.3304	0			43.3	1						9.1	8.9	11	13.4	0.8			6.9		0.3			5.4
R-HSA-2025928	Yes	Yes	Yes	0.3055	0		1.5	22.2		14.6	3.2	0.8		16.3	15.7	1.1		15.1					1.1	7.3		1
R-HSA-202670	Yes	Yes	Yes	0.1533	0					34.1	12.1			14.6	1.7	3.5	12.7	11.5		2.4						7.4
R-HSA-202733	No	No	Yes	0.1255	0		4.9	41.1	4.4		0.2					21.2	7.9			5.9					5	9.4
R-HSA-2028269	No	No	No	0.0715	0			30.8	5.8			17.7				6.5		1.5				2.4		35.4
R-HSA-2029480	No	No	No	0	0
R-HSA-2029481	No	No	No	0	0
R-HSA-2029482	No	No	No	0	0
R-HSA-2029485	No	No	No	0.0696	0	1.2	2.4	39.9	0.9							42.1									1.8	11.7
R-HSA-203927	Yes	Yes	No	0.0881	0	3.3	1.6	29.1			11			7.4	10.7			21.5		10.8				4.6
R-HSA-204005	No	No	No	0	0
R-HSA-204174	No	No	No	0.0238	0										73.5								2.3		24.2
R-HSA-2046104	No	No	Yes	0.2926	0.1892		6.1	42.4		2.1		1.3		3.9	5.1		9.1	21.6	6.6	1.7
R-HSA-2046106	No	No	Yes	0.2926	0.1892		6.1	42.4		2.1		1.3		3.9	5.1		9.1	21.6	6.6	1.7
R-HSA-204998	No	No	No	0.0362	0			23.3									18.8	38.4									19.5
R-HSA-205043	No	No	No	0.0034	0									37.7	1.5			9.9						50.9
R-HSA-209543	No	No	No	0.0585	0					18.9	3.2			13.1	25.5	4.1								35.1
R-HSA-209560	No	No	No	0	0
R-HSA-210500	No	No	Yes	0.2003	0			26	3.6	4.3	6.2			9	8.1			33.4						9.3
R-HSA-210744	No	No	No	0.0834	0			42		28	21.6			3.3								5.1
R-HSA-210990	No	No	Yes	0.3345	0			41.1	0.5		4.2	0.2	0.8	2.8	7.4		16	17.1		7.3				2.7
R-HSA-210991	No	No	Yes	0.4231	0		2.9	49.7		21.9			2.6		2.3		11.6	5						2.2		1.8
R-HSA-210993	No	No	Yes	0.1069	0	2.9		8.4	2.1	17.9				11.9	8.3	10.8		15.6	0					22.1
R-HSA-211000	Yes	Yes	Yes	0.1889	0	1.9		12.7		17.9	12.1			9.4	11.2			20.9		7.1				6.8
R-HSA-211733	No	No	No	0.0637	0			31.5	6.8	24.9	13.3			14.4	0.5						1.9	6.7
R-HSA-211859	Yes	Yes	Yes	0.2868	0.0802					38.3				10.1	16			15.9		7.8						2.4	9.5
R-HSA-211897	No	Yes	Yes	0.1306	0			46	3.3						0.3		27.5	11.9		7.1							3.8
R-HSA-211945	Yes	Yes	Yes	0.2788	0		1.2			37.2				8.3	7.6	1.3	0.9	20.9	3	8.6				0		1.6	9.3
R-HSA-211976	No	No	No	0	0
R-HSA-212165	Yes	Yes	Yes	0.139	0.1055			12.5		28.4	0.2			7.7	17.7			21.4						12.1
R-HSA-2122947	No	No	No	0.0905	0	1.7		35.4		23.4	30.8			7.7	0.5							0.5
R-HSA-2122948	No	No	No	0.036	0			44.5			18.2						37.4
R-HSA-212300	No	No	No	0.0481	0	3.4	4.2	42.1		20.6	0.3		6.6			9	2.1	4.6	7.1
R-HSA-212436	Yes	Yes	Yes	0.3032	0.1118			3.2		26.8	13.4			13.8	13.4		0.2	16.4		2.7				10.1
R-HSA-212676	No	No	Yes	0.3786	0	3.3		47.6	2.7	24.4	4.2			0.1	0.3	5.5		4.3	7.1				0.5
R-HSA-2129379	Yes	Yes	Yes	0.2018	0			13.2		36.1					4.5	4.3		27								4.4	10.6
R-HSA-2132295	No	No	Yes	0.2361	0			47.4	0.8	31.8	1.6			3.8		8.7		0.7		2.7		2.4
R-HSA-2142691	No	No	Yes	0.2376	0	6.6		49.1						11.4	9.5		8.4	10		1.6				3.5
R-HSA-2142753	No	No	Yes	0.1862	0	2		42.9						8.8	10.7			31.3						4.3
R-HSA-2142845	No	No	Yes	0.1963	0.2606					42.5			0.7	16.4	7.3	7	3.8	12.2		5.3							4.8
R-HSA-2151201	No	No	Yes	0.1014	0	8.1	4.3	22.1	2.3	7.4	11.5			6.3	11.7			15.4						10.9
R-HSA-216083	No	No	Yes	0.1036	0.0019	0.9		29.2			11.8		11.3	17.8	10.7	9.7				0.7							8
R-HSA-2160916	Yes	Yes	Yes	0.2376	0			11.5		43.8			2.3	15.8	5.7	1.5		10.8	1.9	6.8
R-HSA-2162123	No	No	Yes	0.1296	0			33.7					4				1.1	61.1
R-HSA-2168880	No	No	No	0	0
R-HSA-2172127	No	No	Yes	0.2182	0	4.4	3.3	21.7	5.1		3		4.6	10.7	14.8		5.1	7.8		3.6			11.5	4.5
R-HSA-2173782	No	No	Yes	0.1117	0	1	5.3	28.6	2.1	12.5	10.3	6.8	2.3		3.3	10.7	5.3	8.2			3.7
R-HSA-2173788	Yes	Yes	Yes	0.2521	0			11.1	2.1	19.7	14.1		4.9	18.4	12.4	0.4		7.7		0.6	8.6
R-HSA-2173789	No	No	Yes	0.1707	0				2.4	24.1	15.1		9.9	19.5	10.3	0.9	5.9	1		0.7	10.1
R-HSA-2173791	No	No	No	0.0604	0		0	6			23.7		19.2					4.7					5.6	21.5	19.3
R-HSA-2173793	No	No	Yes	0.1911	0.0042				3.3	32.3	9.5		0.7	14	7.9			13.8		5.4	2.4	2.8		7.9
R-HSA-2173795	Yes	Yes	Yes	0.203	0				4.5	32.3	8.2		0.7	14.5	7.1	0.1		12.9		6.4	1.4	4.9		7.1
R-HSA-2173796	Yes	Yes	Yes	0.2627	0			14.5		21.8	13.1		4	5.1	4.6		11	16.9		6.7	2.4
R-HSA-2187338	No	No	Yes	0.2604	0		2.7	47.2		19.1	3.2	1.7		0.4	5		7.8	11.5				1.3
R-HSA-2197563	No	No	No	0.0468	0			28.3	0.2	26.4	13.3			11.6	3.4	2.9						13.9
R-HSA-2206281	No	No	Yes	0.115	0.1277					36	3.5				0.7		39	19.2	1.6
R-HSA-2219528	No	No	Yes	0.2112	0			27.2	1.1	25.6	15.8		0.7	13.7	6.6	2.6						1.9		4.9
R-HSA-2219530	No	No	No	0.0612	0		1.9			20.1	9.9	6.5		6.2	8.4		24.4	16.4							6.3
R-HSA-2262752	No	No	No	0	0
R-HSA-2299718	No	No	Yes	0.1236	0		4.4	28.6		15.2	7.6		3.9			2.8	15.4	5.1	5.5	0.9			2.4	8.3
R-HSA-2404192	No	No	Yes	0.1436	0			36.2		22.6	16.9			11.8		4.9								7.5
R-HSA-2408522	No	No	Yes	0.2376	0.0139			41.9		14		6.3				10.4	12.5			1.3			1.8			3.1	8.7
R-HSA-2408557	No	No	Yes	0.2172	0.1137			41.6		12.4		6.5				11.7	12.2			1.1			1.7			3.2	9.7
R-HSA-2424491	Yes	Yes	Yes	0.4269	0.1926	0.8	1.8	26.7	3.8	1.9	2.8		2.1	10.3	15.3	6.8		17.5		4.6			5.6	0
R-HSA-2426168	No	No	No	0.0024	0						100
R-HSA-2428924	No	No	Yes	0.1436	0			36.2		22.6	17			11.8		4.9								7.5
R-HSA-2428928	No	No	Yes	0.1396	0			36.7		23.4	16.2			11.3		4.6								7.9
R-HSA-2428933	No	No	No	0.0755	0		1.7	25.9	5.8	27.8	0.2			8.4	3.6	9.1						7.5		10.2
R-HSA-2454202	No	No	No	0.098	0			49.1			6.2					44.7
R-HSA-2465910	No	No	No	0.0945	0			57.8										28						14.2
R-HSA-2467813	No	No	Yes	0.1527	0			60.6									8.4	31
R-HSA-2468052	No	No	No	0.0999	0.0291	2.1		16		20.4	3.7			10.9	12.2			22.4					0.3	11.9
R-HSA-2470946	No	No	No	0.0819	0	3.9		6.7		25.9	7.5			11.2	11.2			22.7					0.8	10.1
R-HSA-2500257	Yes	Yes	Yes	0.1941	0	6.4		18.8		15.1	8.6			10.1	10.2	3.3		18.7		2.2				6.6
R-HSA-2514853	No	No	Yes	0.268	0	4.7		50.6						5.9				35.9		0.4							2.5
R-HSA-2514856	No	No	Yes	0.3283	0			49.5							6.9		15.3	28.4
R-HSA-2514859	No	No	Yes	0.3242	0			49.3							5.9		15	29.8
R-HSA-2555396	No	No	Yes	0.1371	0			57.3			2.6						8	30.1						2.1
R-HSA-2559580	No	No	Yes	0.3417	0		1.9	50.6		25.6	2.5					3.8	9.1	6.4						0.1
R-HSA-2559582	No	No	Yes	0.1792	0			50.5		12.5						4.1	10.6	20.5		1.9
R-HSA-2559583	No	No	Yes	0.3852	0		3.4	48.2		27.4	2.4					3	8	5.7						1.9
R-HSA-2559584	No	No	Yes	0.259	0			45.5		11			8.8	2.9	13.8			13.4	1.4	1.5	1.8
R-HSA-2559585	No	No	Yes	0.2112	0		2.4	31.6	4.4	20.2	10	1		7.2		4.3	5			1.4		4.6		2		0.4	5.4
R-HSA-2559586	No	No	Yes	0.1945	0		5.1	44.8	0.1	29.4					2.8	0.8	7.1	5	3.1	0.3			0.8	0.9
R-HSA-2564830	No	No	Yes	0.2332	0	3.2	2.1	26.2	3.6	15	1	0.1	0.3	3.7	1		15.9	3.8	1.6	1.9	0.2	8.3	5.4		1.8	2.1	2.8
R-HSA-2565942	No	No	Yes	0.2102	0	2.9		32.8	0	2.5	16.8		1.8	6.1	10.9			18.5		3.5					4.3
R-HSA-2586552	No	No	Yes	0.2705	0.2637			52.4		16.6	6.1				0.5	12.9		11.5
R-HSA-2644602	No	No	No	0.0732	0	20.5					72.2				7.3
R-HSA-2644603	No	No	No	0.0732	0	20.5					72.2				7.3
R-HSA-2644606	No	No	No	0.0732	0	20.5					72.2				7.3
R-HSA-264870	No	No	No	0	0
R-HSA-264876	No	No	Yes	0.1342	0	0.7		16.9	3.5	19.1	1.5	3.5	1.2	4.2	4.4	10.8		6.7		1.6			0.5	11.6	4	4	5.8
R-HSA-2672351	No	No	Yes	0.2509	0		5.3	22.4	1.3	12.6	0.1		5.5	4.5		13.1	8.6	0.2		2.9		4.8			0.8	6.7	11.1
R-HSA-2682334	Yes	Yes	Yes	0.1591	0			40	1.2						1.4	4.9	29.1	2.5	0.3	11.2						2.2	7.1
R-HSA-2691230	No	No	No	0.0146	0						100
R-HSA-2691232	No	No	No	0.0146	0						100
R-HSA-2730905	No	No	No	0	0
R-HSA-2871796	No	No	No	0	0
R-HSA-2871809	No	No	Yes	0.1184	0			45.6		2.9						51.5
R-HSA-2871837	No	No	No	0.0472	0			52.7			20.1			0.1		22.5					4.6
R-HSA-2894858	No	No	No	0.0732	0	20.5					72.2				7.3
R-HSA-2894862	No	No	No	0.0732	0	20.5					72.2				7.3
R-HSA-2979096	No	No	No	0.0193	0												100
R-HSA-2980736	No	No	No	0.0986	0		6.2			33.5		0.5	12.1			18.4	2.4		0	22.8				4.3
R-HSA-2980766	No	No	Yes	0.1492	0	3.5		11		20.3	12.6			8.6	3		4	26		5.1			1.3	4.7
R-HSA-2990846	Yes	Yes	Yes	0.2257	0.1763	0.7		17.4		13	14.8			9.8	10.3		8	18.2		3.8				4
R-HSA-2995383	No	No	No	0.0201	0						54.1									45.9
R-HSA-2995410	No	No	No	0.0201	0						54.1									45.9
R-HSA-3000157	No	No	Yes	0.1854	0.138	1		48.6			6.5			3.3	5.6		19.1	11.8			4.2
R-HSA-3000170	No	No	No	0.0728	0						37.1			31.6				16.7									14.6
R-HSA-3000171	No	No	No	0.0741	0						36.1			32.9				17.2									13.8
R-HSA-3000178	No	No	No	0.0952	0					8.4								62.4									29.2
R-HSA-3000480	No	No	Yes	0.3285	0		3.3	44.9	1.1	21.7	2.8			1.1	5.8		7.2	6			0.4		3.3		1.1	1.3
R-HSA-3000484	No	No	Yes	0.3105	0			50.3		10.4	1.5			2.4	3.9		4.7	23.9			3.1
R-HSA-3065678	No	No	Yes	0.1385	0			59.4								4.1	20.9	15.6
R-HSA-3108214	Yes	Yes	Yes	0.2021	0.1407	2.1		20.2		14.5	10			6	9.4		8.7	21.9		3.3				4.1
R-HSA-3108232	Yes	Yes	Yes	0.2213	0.1815	1.4		15.8		13.9	15.5			10.2	10.3		7.4	17.9		4				3.7
R-HSA-3134975	No	No	No	0.0157	0									10.2	10.9									78.9
R-HSA-3214815	Yes	Yes	Yes	0.1198	0.0466		1.9	17.7	0.5	31.7	11.6	0.4	0	4.6	14.4		10.4			5				1.8
R-HSA-3214841	Yes	Yes	Yes	0.1043	0	11.6		11.7		18.8	14.2			12	6			18.6		6.1		1
R-HSA-3214842	No	No	No	0	0
R-HSA-3214847	No	No	Yes	0.1642	0			23.5		34.9	9.9		1.7	11.7	8.6			0.5		6.2	0.9	2.2
R-HSA-3214858	Yes	Yes	Yes	0.2266	0.1283	1.9	2.5	38.3			6.2	4.4		0	9.3	2.8	14.5	11.5	1.9	5	1.6
R-HSA-3215018	No	No	Yes	0.1245	0			58.8								3.1	18.2	19.9
R-HSA-3229121	No	No	No	0	0
R-HSA-3232118	No	No	No	0.0088	0																			100
R-HSA-3232142	Yes	Yes	Yes	0.1636	0.0656	6.2		13.2		16.8	13.6			9.5	7.5			24.5		4.4				4.3
R-HSA-3238698	No	No	No	0	0
R-HSA-3247509	No	No	Yes	0.1032	0	6.9				24.4	21			14.4	11.6			15.2		6.3		0.2
R-HSA-3270619	No	No	Yes	0.2529	0.1164			49.9						4.1	6.5		12.6	22.6	4.2
R-HSA-3295583	No	No	Yes	0.1998	0	1.8	8	23.9		15.2	3.2	3	1.8	1.8	4.2	5.6		3.9	5.9				2.3	2.3	1.8	8.1	7.3
R-HSA-3296469	No	No	No	0.0335	0													49.4						50.6
R-HSA-3296482	No	No	No	0.0429	0													51.6						48.4
R-HSA-3299685	Yes	Yes	No	0.0959	0.0363					34				11.2	7.9			25.9		6		10.7	2.1	2.2
R-HSA-3301854	Yes	Yes	Yes	0.1605	0	5		19.2		11.9	13.9			8.8	4.7		0.2	27.1		5.4				3.9
R-HSA-3322077	No	No	No	0	0
R-HSA-3371378	No	No	Yes	0.2368	0		4.9	42	1.2	14	6.8	3.9		4.7		9.3	10.8		1.9	0.5	0
R-HSA-3371453	Yes	Yes	Yes	0.3707	0		1.7	23.1	2.9	6.7	9.5	2.7		2.3	6.5		11.5	17.3	2.2	6.2				1.8		0.5	5.2
R-HSA-3371497	No	No	No	0.0201	0		17.7	30.7	0.6		2.3											6	9	0.9	7.9	17.1	7.8
R-HSA-3371511	No	No	No	0	0
R-HSA-3371556	Yes	Yes	Yes	0.3461	0		1.7	25	1.4	6	11.4	0.9		3	7.4		12	17.1	2.5	6.1				0.8			4.7
R-HSA-3371568	No	No	No	0	0
R-HSA-3371571	No	No	No	0.0638	0			18.1		20.4	11.3		19.2											22.8	8.3
R-HSA-349425	No	No	No	0.0714	0			32.7	6	24.1	14.2			14.1								9
R-HSA-350054	No	No	No	0.0891	0.0514	6		36.6		14.7	39.4			3.3
R-HSA-350562	No	No	No	0.0661	0			25.3	7.9	23.6	14.7			16.8	3.1						0.9	7.7
R-HSA-351202	No	No	No	0.0577	0			20.2	8.4	21.6	14.5			16.9	3.2					1.6	1.5	4.8	1.5			3.8	1.9
R-HSA-352230	No	No	Yes	0.1151	0			41.3	5.1	29.5			9					2.4		5.1	3.2		4.4
R-HSA-354192	No	No	No	0.0569	0		1.9	7		8.8	7.8		9.5	10	11.7		2.3	8.2	0.6	7.8			2.2	0.8	3.4	6.4	11.6
R-HSA-354194	No	No	Yes	0.125	0	3.9	3.9	10.1		8		1.1	1	14.5	3.7	12.8	9.7	4.2	5.3	1.7		5		1.6	0.9	2.7	10
R-HSA-3560782	No	No	Yes	0.1057	0			1		37.1					2.5		30.1		9.9	2.3				9.5	7.7
R-HSA-3700989	Yes	Yes	Yes	0.3172	0.1077			23.9		7.3	13.1			12.8	14.5			17.6		2.7				8.3
R-HSA-372708	No	No	Yes	0.1789	0	3.9	5.4	14.8	0.1	7.3	0.2	0.5	3.5	11.5	1.6	8.3	13	9.1	2.8	1.4	3.2	0.4			2	2.6	8.4
R-HSA-372790	No	No	Yes	0.1735	0		2	34	2.9	18.9	5.4	2.4	3.3	6.4	0	0.9	11.3	7.4		1.4	2.8			0.8
R-HSA-373076	No	No	Yes	0.2077	0	0.3		49.7		12.1	1.8	1.2			1.5		13.7	18.5						1.3
R-HSA-373080	No	No	Yes	0.3128	0.1863		2.3	50.4		16.6				0.2			16.6	13.8
R-HSA-373752	No	No	Yes	0.2656	0			47.5	1.2					0.5	2.4		10.3	36.8		1.3
R-HSA-373753	Yes	Yes	Yes	0.3373	0.1065	5.4	1.8	23.3		8.3	13.9			13.7	11		1.7	17.4		3.6
R-HSA-373755	Yes	Yes	Yes	0.1464	0			35.2								3.9	43.5	1.4								5.6	10.4
R-HSA-373760	No	No	No	0.0963	0	11.6		32.4		1.3	6.9	0.9	6.8			0.6	3.7			3.5		2.8	2.9	9.2	3.7	2.3	11.4
R-HSA-375165	No	No	Yes	0.2978	0.0084	3.4		24.8		9.9	9.7			14.2	13.1			18.9		2.8				3.1
R-HSA-375276	No	No	Yes	0.1391	0			44.1			3.3						18.6	28.3	4.9					0.7
R-HSA-376176	No	No	Yes	0.2238	0			42.6		14.9		4.7				7.8	13.8						3.3			4.3	8.6
R-HSA-3769402	Yes	Yes	Yes	0.3033	0	4.2		19.6	1.3	12	12.3				2.4	0.8	23.5	12.8		5.3				1.8			4.1
R-HSA-3781860	No	No	Yes	0.1144	0			27	4.9	22.8		6.4						5.5	12.7			8		12.7
R-HSA-3781865	Yes	Yes	Yes	0.1929	0			7.8		34.6					11.4		9.7	30.8	0.9	4.7
R-HSA-379716	No	No	Yes	0.3603	0		0.2	40.3	3.1	15.8	7.1			9.1			13.4	7.8				3.2
R-HSA-379724	No	No	Yes	0.3577	0		0.4	39.9	3.3	16.1	6.5			9.3			13.4	7.9				3.2
R-HSA-379726	No	No	Yes	0.3029	0		3.4	35	4	19.6	2.5	1.7		9.4		1	16.3	2.8				3.5		0.8
R-HSA-380108	No	No	No	0	0
R-HSA-380259	No	No	Yes	0.1336	0	4		43	4.9		10.6			2	11.4		10.4	7.3	1.9	4.4
R-HSA-380270	No	No	Yes	0.1232	0		1.2	39.2	5.1		15.5				12.7		17.6		2.3	6.2
R-HSA-380284	No	No	Yes	0.1336	0	4		43	4.9		10.6			2	11.4		10.4	7.3	1.9	4.4
R-HSA-380287	No	No	Yes	0.1232	0		1.2	39.2	5.1		15.5				12.7		17.6		2.3	6.2
R-HSA-380320	No	No	Yes	0.1772	0	5.7	1.3	37.1	2.6		9.7		2.6	4	5.2		9.7		0.9	7.7			1.5	2.8	3.3		5.9
R-HSA-380972	No	No	No	0.0873	0			50.3		5					3.8	12.4	7.6	20.8
R-HSA-380994	No	No	No	0.03	0	0.1		20.9					0			18.3	10.7			3.6			19.5	26.9
R-HSA-381033	No	No	Yes	0.1824	0			48.3	3.5	12.4		2.9		9.2	5.6		5.4	7.4		0.8			4.5
R-HSA-381038	No	No	Yes	0.1744	0			52.9		33		2.7					6.1		0.1				5.3
R-HSA-381042	No	No	Yes	0.1696	0			51		25.7		5.2					7.9	5.1					1.6	3.6
R-HSA-381070	No	No	Yes	0.1534	0			42.1	4.8	14.8		10.9		11.7					7.9	6.2			1.6
R-HSA-381119	No	No	Yes	0.2465	0			44.9	2	17.5		6.2		7	5.7		4.7	2.9	1.7	2.3			2	3.2
R-HSA-381183	No	No	Yes	0.1258	0			50.3	5.6	10.7		1.8		12.1	5.9		4.7	2.9					6.1
R-HSA-381340	No	No	No	0	0
R-HSA-381426	Yes	Yes	Yes	0.1418	0			8.8		32.6			6.7		3	0.3		19.4		6.1			6.4	4.2		12.5
R-HSA-381676	No	No	Yes	0.2377	0	2.9		27.5	2.7	17	2			14.5		5.4	19.6	1.7		1		0.9		4.8
R-HSA-382551	No	No	No	0.0348	0					22.1						33.3		29.6									15.1
R-HSA-382556	No	No	No	0.0562	0			33.3	8.7	27.1	9.2			13.5								8.2	0.1
R-HSA-383280	No	No	Yes	0.1631	0		6.3	9.4		13.2	21.9			20.5	21.4							7.1
R-HSA-3858494	No	No	No	0.0011	0			100
R-HSA-388396	No	No	Yes	0.1341	0		0.5	29.3	4.3	17.5	6.7	4.5	3.2	7.1		2.2	8.6	5.1		0.9	2.6		0.8			2.2	4.5
R-HSA-388841	No	No	Yes	0.3596	0			46							14.4	15.3	4.4	11.9				2.2					5.9
R-HSA-389356	Yes	Yes	Yes	0.2037	0			29.9		4.6	7.7			2	18.8		8.8	27.1		1.2
R-HSA-389357	Yes	Yes	Yes	0.2776	0			34.8		0.6	8.6			6.2	13.7		9.9	21.3		1.3				3.6
R-HSA-389359	No	No	Yes	0.217	0			36.3		13.3	4			6.7			11.1	19.2				6.6		2.8
R-HSA-389513	No	No	Yes	0.2938	0		0.8	48.2						3.5	12.8			34.7
R-HSA-389661	No	No	Yes	0.1749	0			50		19.4							13.5	14.4				2.8
R-HSA-3899300	Yes	Yes	Yes	0.2127	0	4.7				19.9	26.5			20.3	11.5	1.1		10.5		3.1				2.5
R-HSA-389948	No	No	Yes	0.3083	0			44.1	2	2					10	18.6	1.7	7.9	1.4			5.4					7
R-HSA-389957	No	No	Yes	0.125	0			50.8	1.4	18.4		1.2		0.5		8.1	8.4			2.8			8.5
R-HSA-389958	No	No	Yes	0.128	0			50.9	1.2	17.6		0.4		0.7		9.1	8.8			2.2		2.8	6.1
R-HSA-389960	No	No	Yes	0.1266	0		0.8	53.7		8.4						12.2	13.1			0.7		11.1
R-HSA-389977	No	No	No	0.0416	0			9										69.4					8.4	13.2
R-HSA-390247	No	No	Yes	0.3125	0.2052	0.8	3.6	44.2	0.7	5.7				12.2	8.5		4.7	18.4						1.3
R-HSA-390450	No	No	Yes	0.3006	0			46.4	1.6	18.5	0	0.6		2.2		5.6	9	13.3				2.6
R-HSA-390466	No	No	Yes	0.1681	0			51.6		18.8		0.7				3.3	9.7	9.3		2.9		0.5	3.3
R-HSA-390471	No	No	Yes	0.309	0			50.1		15.2		0.3				2.7	9.9	21.8
R-HSA-390522	No	No	No	0.0159	0							20.7															79.3
R-HSA-3906995	Yes	Yes	Yes	0.1603	0			44.9							7.6		6.8	40.8
R-HSA-390918	No	No	Yes	0.1761	0	1.7	0.6	23.4	3.5	24.6	4.3	0.3		10.3	5.5	7.3	13.8	4.5
R-HSA-391160	No	No	Yes	0.1509	0			53.2	5						1.5		20.4	19.9
R-HSA-391251	No	No	Yes	0.1553	0			52.3		20.1		0.3				3.1	10.3	7.6		2.3			4.1
R-HSA-391903	No	No	Yes	0.2284	0			48.8				4.2				12.5	4.7	14.4		8.7							6.7
R-HSA-392154	No	No	Yes	0.19	0			49.3		26.7	3.8						2.5	8.5			3.7	5.5
R-HSA-392170	No	No	Yes	0.324	0		0.2	44.1	0.9	12.4		1.6		3.2		4.1	17.5	13						2.9
R-HSA-392451	No	No	Yes	0.2293	0	0.1		44.1	0.2	14	2.7			8.6		2.4	19.9	8
R-HSA-392499	No	No	Yes	0.2722	0			43.6		17.6		5.7				0.8	15.4	3.5		1.3			2.1			3.4	6.5
R-HSA-392517	Yes	Yes	Yes	0.3416	0.2707			28.5		8.6	6.3		1	11.4	19.8			24.4
R-HSA-392518	No	No	Yes	0.393	0.0348	1.6	3.1	35.3	3.7	16.4		1.9	0.3	6	0.2	3.9	14.8	8.2		0.1			0.1	4.4
R-HSA-392851	No	No	Yes	0.2817	0.144			45.4		11.9		0.6		4.5		3	18.1	15.7						0.8
R-HSA-3928662	No	No	No	0.0941	0.2068			45.3				10.1		0.6		19.4	18.7			6
R-HSA-3928663	No	No	Yes	0.1954	0.0138	8.3		15.1	0.9	5.9	3.1			20.5	6.8	12.6	7.4	16.8	0.6		1.6			0.2
R-HSA-3928664	No	No	No	0.0346	0				46.4						19.7	14.2		18						1.6
R-HSA-3928665	Yes	Yes	No	0.038	0.0324			14.7	6.6	10.9				14.3	10.9		4.5	6		19.9				12.1
R-HSA-397014	No	No	No	0	0
R-HSA-397795	No	No	Yes	0.1905	0			51.1				3.6					29.6	15.7
R-HSA-399719	No	No	Yes	0.1474	0			19.1			24.7		10.2	16			2.4	11.5							3.9	4.9	7.3
R-HSA-399721	No	No	Yes	0.1474	0			19.1			24.7		10.2	16			2.4	11.5							3.9	4.9	7.3
R-HSA-399954	No	No	Yes	0.1584	0	0.8		36	4	24.7	4.6			1				13.6		0.8				9		5.6
R-HSA-399955	No	No	Yes	0.2967	0		1.4	42.1	6.9	13		2.2		8.4	7.1			17.9						0.9
R-HSA-399956	No	No	Yes	0.2122	0.0018	2.8	0.9	36.5	3.2	14.2	0.1	1.5		13	2.4	9.1		13.9		0			2.4
R-HSA-399997	No	No	Yes	0.1947	0			32.1	11.2		8.3	5.6		1.5			2.5	18.9		3.4	1				1	3.1	11.5
R-HSA-400042	No	No	Yes	0.287	0.0203			48.5		8.8		0.2		2		3.7	18.8	17.7						0.2
R-HSA-400206	No	No	No	0	0
R-HSA-400253	No	No	Yes	0.1315	0					22.1	19.8			22.1	21.5							13.2		1.3
R-HSA-400451	No	No	Yes	0.2202	0	5.5	2.9	16.8	7.8	8.2	0.5	5		3	4.1	2	13.3	9		4.9				0.5	4.1	2	10.4
R-HSA-400685	Yes	Yes	Yes	0.2908	0	3.6	4.5	36.4	1.3	15.2		1.9		3.7	5.5	4.9	17.7	3.5	1.6			0.3
R-HSA-4085001	No	Yes	Yes	0.2668	0.1055			48.9						4.6	9		13.1	21.6		0.4				2.4
R-HSA-4085377	Yes	Yes	Yes	0.2018	0.0361	2.1		24.1		7.3	11.8	1.8		5.8	6.2		3.9	24.6		4.7				3.5			4.2
R-HSA-4086398	No	No	No	0.0891	0			22.3	9.6	27.9	13.5			15	4		0.4			2.7		0.2		4.3
R-HSA-4086400	No	No	No	0.0705	0			32.8	7.4	26.1	9.1			11.1								10.2				3.2
R-HSA-4090294	No	No	No	0	0
R-HSA-416476	No	No	Yes	0.2563	0		2	37.6	3.3	16.6	6.8	5		3.6		0.8	8.4	6.2		0.6		3.3				2	3.8
R-HSA-416482	No	No	Yes	0.154	0			41.8	2.5	13.2				5.6			19.5	14.1					3.3
R-HSA-416572	Yes	Yes	Yes	0.2785	0	3.3	4.6	32.2	2	16		1.8	1.2	4.7	5	4.1	14.9	3.5	1.3			1		0.4	0.6	1.2	2.4
R-HSA-416700	Yes	Yes	Yes	0.1503	0			30.9		8.9							25	23.1		0.3				1.5			10.2
R-HSA-416993	No	No	Yes	0.2826	0		8.2	37.1	3.6	15.7	0.9	3.7	1.2				16.3	5.1		1.1				6.4	0.7		0.1
R-HSA-418038	No	No	Yes	0.1231	0			35	11.4			18.8			7.9	13		0.8	6.9	0.5				5.8
R-HSA-418217	No	No	Yes	0.2954	0			51.9								1.7	24.2	22.3
R-HSA-418346	No	No	Yes	0.3108	0.1748	5.6		30.3	2.6	17				12.1	1.5		26	1.8		0.5		1.3		1.3
R-HSA-418360	No	No	Yes	0.1039	0	10.1		10.4		19	11.1			16	17.6					6		0.3				9.4
R-HSA-418457	No	No	Yes	0.1812	0			50.1		26.6	4.3						2	7.9			3.1	5.9
R-HSA-418555	No	No	Yes	0.1546	0.0639		0.4	40.4	4.4	12.7		2.8		9.1		3.4	11.7	15
R-HSA-418592	No	No	Yes	0.396	0.1645	0.3	2.2	40.2	2.6	15		1.8		3.8		3.8	14.2	12.1						4.2
R-HSA-418594	No	No	No	0.0683	0			42.4								9.1	13.3	35.2
R-HSA-418597	No	No	Yes	0.135	0	1.1	0.1	16.8	2.9	15.4	0.6	0.2	3.2	24	1.8	10.4	18			3.2			2.2
R-HSA-418885	No	No	Yes	0.3494	0			49						9.3	3.8		7.8	28.9					1.3
R-HSA-418990	Yes	Yes	Yes	0.1084	0			10.3	4.2	24.6	10	5.1		3.4	9.4		18.7			1					1.4	6.4	5.7
R-HSA-419037	No	No	Yes	0.1473	0.0352	1.5	4.3					0.2		25	21.4	25.3	9			0.1				13.1
R-HSA-420029	No	No	Yes	0.1756	0			45.4			6.7					1.7		8.4	4.7					11.9	21.2
R-HSA-420092	No	No	Yes	0.2696	0.1888			48.5		9.8		0.2		2.1		4.2	16.2	18.9
R-HSA-421270	No	No	No	0.0643	0.0579				2.6	34	3.9	2.8			5		24.3		8.7	0.7				5.6			12.3
R-HSA-422356	No	No	Yes	0.1909	0	7.7		24.4	6.6	10.2	5.6	2.8		11.2		6.1	17.8	3.6	0.4	0.8				2.7
R-HSA-422475	No	No	Yes	0.2147	0			40.7	0	13.6	3.3	5.1				5.7	14.6			1.4			4.1			6	5.5
R-HSA-425366	No	No	Yes	0.2227	0			46.7	6.1							12.5	11.5	10.8		1.2							11.1
R-HSA-425393	No	No	No	0.0026	0																	62.1	7.9			30
R-HSA-425397	No	No	No	0.0877	0			35.7		36.4		9.7	1.6	4						1.5			1.3			9.8
R-HSA-425407	No	No	No	0.0912	0			41	4.3							25.9	7					9.1					12.6
R-HSA-425410	No	No	Yes	0.1871	0			53.5	1.2							13.1	7.7	23.4		0.1		1
R-HSA-427359	No	No	Yes	0.1236	0		2.6	44.6		6.6	1.3	0.4	0.1			8.9	14.1	13.9	4.5	1.6				1.5
R-HSA-427389	No	No	No	0	0
R-HSA-427413	No	No	No	0.0614	0		7.1	32.1	8.8	20.1	2.9		4.5	5.7		3.9	3.6	4.3	5.1				2
R-HSA-428157	No	No	Yes	0.1495	0	0.1	1.3	13.7		39.7						3.7		20.3	0.5	10.1					3.7		6.9
R-HSA-428540	No	No	Yes	0.2193	0		1.6	43.4	0.4	18.6		3.1				7.4	14.4					3.4		2.4			5.2
R-HSA-428930	No	No	Yes	0.3707	0	1.3	3	32.7	4.6	17.7		1.4		8.4		4	14.9	6.4	0.2					5.5
R-HSA-429914	No	No	Yes	0.1154	0			38.7		1.7				1	4.8			37.4						16.4
R-HSA-429947	No	No	Yes	0.1643	0			43						2.3	5.9			36.1		1.9				10.8
R-HSA-429958	No	No	Yes	0.1761	0			38.7						4.8			14.3	37.4						4.8
R-HSA-430039	No	No	No	0.0591	0				3.4	15.3		37				14.8						16		13.5
R-HSA-430116	Yes	Yes	Yes	0.2078	0	1.9	1.6	14.9		4.3	15.5	3.8	3.2	13.6	17.2	7.9		11.3	0.4	1.3			0.5	2.6
R-HSA-432040	No	No	Yes	0.1328	0	0.9	0	19.2	4.3	10.5	0.4		0.6	17.6		11.4	11.5	8.2	1.9	0.6		2.1		4.8		0.4	5.8
R-HSA-432142	No	No	No	0	0
R-HSA-432720	No	No	Yes	0.2701	0.0188		3.8	37.8		39.9	0.8			4.4				6.7		0.9			3.6			2.3
R-HSA-432722	No	No	Yes	0.1803	0	9.6	5.3	29.1	1.5	23.6	5.8		5				11.3		1.7					7
R-HSA-434316	No	No	Yes	0.2496	0			36	10			3.2					12.8	19.6		2.4	1.1					2.5	12.4
R-HSA-435354	No	No	Yes	0.1024	0			8.4	4.8		1.9	2.3		7.8	6.3	19.5		9.8		4.5				34.7
R-HSA-437239	No	No	No	0.0208	0													77.8						7.7			14.5
R-HSA-438064	No	No	Yes	0.1195	0	1.3	5.9	8.9	4.3	12.6	8.5	3.3	8	8.6	0.5	10.5		4.1	2	0.1	4.5				3.2	2.7	10.8
R-HSA-438066	Yes	Yes	Yes	0.1275	0.0057					19.4	11.9		8.2	3.2	14.3		7.9	7.1	4.8				3.3		5.4	14.6
R-HSA-4419969	No	No	Yes	0.1101	0		4.3	18.3	2.2	24.1	1.5		5.3	7			2.8	8.8	9.2	2.2		4.6		1.3	6	0.6	1.8
R-HSA-4420097	No	No	No	0.0326	0				6.5	15.8	14.1	4.1		15	2.4	5.9		21.7		6.5			8
R-HSA-442720	No	No	Yes	0.1536	0		2	19.1	1.6	5.6	4	1.7	0.5	15.3	8.7	10.7		11.5	3.8	0.9	2.4			7.8			4.4
R-HSA-442729	No	No	No	0	0
R-HSA-442742	No	No	Yes	0.1422	0	1.3	3.8	12.7	5.5	15.2	8.6	3.3	0.8	10.4	4.7	6.6	4.6	3.8			4.1			3.5		4.9	6.1
R-HSA-442755	No	No	Yes	0.1689	0	0.2	5.3	15.4	4.2	13.4	8.2	2.7	7.1	6.6		8.6		6.7	0.3		4.7				3.4	3.6	9.8
R-HSA-442982	Yes	Yes	Yes	0.1057	0				1	38.3		2.9		2.1	7.4			28.1					0.6	19.6
R-HSA-445095	Yes	Yes	Yes	0.3047	0.0185		2.6	33.5		2.4	12.9			0.3	8.1	4.1	20.3	10.8		4.9	0.1
R-HSA-445144	No	Yes	Yes	0.1227	0					29.5						4.3	7.8	26.2						4.6	1.3		26.2
R-HSA-445355	Yes	Yes	No	0.0892	0			5		15.2		4.8			2.4		13.3	15.5		0.6				17.1		3.5	22.5
R-HSA-445717	No	No	Yes	0.1707	0			26.5	3.6	13.3	0.4		0.1	15.5		10.4	12	8.4	2.1	0.8		2.5		4.4
R-HSA-445989	No	No	No	0.0709	0					17.3		13.5			28.4								8.9		6.6	11.9	13.4
R-HSA-446193	Yes	Yes	Yes	0.2352	0.0217	0.8		21.5		11	12.8			16.6	10.6	4.9	0.2	10.3		5.1	2.8						3.5
R-HSA-446203	No	No	Yes	0.143	0	1.6		45.4	1.4	18.3		6.7		4.5	8.8		2.3	3.9	0.1				4.2	2.7
R-HSA-446219	Yes	Yes	Yes	0.2331	0.1339			28.8		7.2	10.1			14.8	10.1	3.2	1.6	15.7		4.4	2.1			2
R-HSA-446353	No	No	No	0	0
R-HSA-446652	Yes	Yes	Yes	0.1344	0		5.2	28.3	5.7	2.2	7.4			9	13.7		13	8.6		0.8	0.3		5.6
R-HSA-446728	No	No	No	0.004	0																						100
R-HSA-447115	No	No	Yes	0.1782	0			50.2		1.6	1.7						8.4	25.1							7.8	5.2
R-HSA-448424	No	No	Yes	0.1493	0.056			45.2	2								35.8	2.3				2.9		0.8			11
R-HSA-449147	No	No	Yes	0.1086	0			39.3								15.7	8.5	14.8			9.4						12.3
R-HSA-449836	No	No	No	0.0532	0			31.4	14.4				16.4		7.4				13.2			17.3
R-HSA-450282	No	No	Yes	0.2579	0.1545		1.1	43.2									33.8	4.9			1.8			5.1			10.1
R-HSA-450294	No	No	Yes	0.1302	0.0817			43.7	2	0.5							36.3				2.3			4.2			11.1
R-HSA-450302	No	No	No	0	0
R-HSA-450321	No	No	Yes	0.1189	0				3.6	22	7.1	1.4	0.5	7.5	5.6			18.7	8.5	4.8				9.4	6.1	4.9
R-HSA-450385	No	No	Yes	0.2462	0			22.2	8.3	22.6		5.5		3.4	3	6.5	5.9	6.4						6.9		6.8	2.4
R-HSA-450408	No	No	No	0.0875	0			32.8	6.3	27.5	10.7			13.3							1.1	8.2
R-HSA-450513	No	No	Yes	0.1417	0			18.2	7.7	23.2		8.6		4.5	2.8	12.1		8.7					0.2	14
R-HSA-450531	No	No	No	0.0693	0			31.8	1.3	25	14.2			15.7	0.7					1.3	5.3	4.7
R-HSA-450604	No	No	Yes	0.1027	0		0.9	28.8	18.8	11.8		3.6	0.3			2.3	13.7			2.8				4.6	10.9		1.5
R-HSA-451326	No	No	Yes	0.2659	0			40.3	0.7	9.5		2		7.6		5.9	19.4	10.8	1.1			2.7
R-HSA-451927	No	No	Yes	0.1147	0			34.4		31.7			10.8	3	0.9									4.1		15.2
R-HSA-452723	No	No	No	0.0878	0.0123			15.8		46.5		1.3		9.2	6.3			8.3					12.5
R-HSA-453274	No	No	Yes	0.1061	0			56.3	5	23.4	2.5						6.6	2.1				4.1
R-HSA-453276	No	No	No	0.0736	0			37.2	4.1	21.8	15.8			10.6			4.4					6.1
R-HSA-453279	No	No	No	0.037	0			100
R-HSA-4551638	Yes	Yes	Yes	0.2451	0			25.6		6	13.7	0.2		1.6	5.8		15.4	22.7		2.8				1.1			5.3
R-HSA-456926	No	No	Yes	0.3521	0.0103	2.6	0.9	34.5	3.6	15.7		0.7		9.5		5.6	17.3	5.9				0.5		3.3
R-HSA-4570464	Yes	Yes	Yes	0.2306	0.1143			23		8.9	14.1			5	7.4		7	26.4		3.2				4.9
R-HSA-4608870	No	No	No	0.0661	0			30.1	7	23.7	12.4			13.1								8.6				3.5	1.7
R-HSA-4615885	Yes	Yes	Yes	0.2165	0.0101	1.6		33.3		2.4	9.3	1.1		4.2	6.2		7	23.9		4.5				2.6			3.9
R-HSA-4641257	No	No	No	0.0683	0			33.7	7.1	24.2	14.9			12.4							1	6.8
R-HSA-4641258	No	No	No	0.0611	0			29.7	7.2	24.5	13.8			15.2	1.2						1.3	7.1
R-HSA-4641262	No	No	Yes	0.3038	0	0.6		17.6	4.5	16	2.7	0.9		11	3.7	8.5	14	11.2	0.4				0.3	8.7
R-HSA-4641263	No	No	No	0	0
R-HSA-4641265	No	No	Yes	0.2803	0	11.4		27.2			2.5	6.1		0.2		3	35.9							4.7		3.1	6
R-HSA-4655427	No	No	No	0.0797	0.0759					13.2	19				9.7	5.7	3.3	8.5	14.5				6.2	8.1			11.7
R-HSA-4791275	No	No	Yes	0.2345	0			12.6	3.4	20.7		0.3		15.3	5.1	11.7	8.5	10.3				2.8		9.3
R-HSA-4839726	No	No	Yes	0.1032	0	6.9				24.4	21			14.4	11.6			15.2		6.3		0.2
R-HSA-4839735	No	No	Yes	0.2417	0	1.8	1.7	1.1	3.8	11	3.8	0.9		15.3	8.3	11.5	10.9	14.1	2.3	0.8				12.7
R-HSA-4839743	No	No	Yes	0.2513	0		0.8		4.6	12.7	3.4	1		15.1	7.2	10.7	11.7	18.2	1.1					13.7
R-HSA-4839744	No	No	Yes	0.2417	0	1.8	1.7	1.1	3.8	11	3.8	0.9		15.3	8.3	11.5	10.9	14.1	2.3	0.8				12.7
R-HSA-4839748	No	No	Yes	0.2417	0	1.8	1.7	1.1	3.8	11	3.8	0.9		15.3	8.3	11.5	10.9	14.1	2.3	0.8				12.7
R-HSA-499943	No	No	No	0.0295	0					26.4					13.6	14	9.5	15.9					2.4		5.7	12.7
R-HSA-500657	No	No	Yes	0.2954	0			51.9								1.7	24.2	22.3
R-HSA-500792	No	No	Yes	0.2569	0		1.1	49.6		14.5	1.3	0.7			1.4		14.4	16.4						0.7
R-HSA-5083635	Yes	Yes	Yes	0.1464	0.0306			17.2		25.1					9.6		1.6	34.2		0.4	4.8		2.4				4.6
R-HSA-5099900	No	No	Yes	0.1741	0		8.1	34.3	5.6	18.7	4.1	2.3	0.9	0.6			16.5							9
R-HSA-512988	No	No	No	0.0497	0			23.7	2	23.2	6.1		5.7	7.6	5.1	4.2				7			6.7			8.9
R-HSA-5140745	No	No	Yes	0.1811	0		7.5	41.9	7	27.6		3		0.2			7.7					0.5		4.6
R-HSA-5173105	No	No	Yes	0.3447	0.1866	1		47.5		19.7				4.7	1.2		19.5	6.5
R-HSA-5173214	Yes	Yes	Yes	0.1505	0.0209			17.5		24.7					9.4		2.3	32.9		0.6	3.7		3.4	0.6			4.9
R-HSA-5205647	No	No	No	0.0311	0			88.1	2.3														9.6
R-HSA-5205685	No	No	No	0.0287	0			91.1															8.9
R-HSA-5210891	No	No	Yes	0.1542	0	2		41.8								1.4	17.6	22					8.4				6.7
R-HSA-5213460	No	No	No	0.0908	0		4.8	39.3	10.4	24.7		15.2					0.2		3.9					1.3
R-HSA-5218859	No	No	No	0.0908	0		4.8	39.3	10.4	24.7		15.2					0.2		3.9					1.3
R-HSA-5218900	No	No	Yes	0.2368	0		4.9	42	1.2	14	6.8	3.9		4.7		9.3	10.8		1.9	0.5	0
R-HSA-5218920	No	No	No	0	0
R-HSA-5218921	No	No	Yes	0.127	0	1.8		33.9	1.3	6	9				1.1		12.1	29.2		5.6
R-HSA-5223345	No	No	Yes	0.1987	0		1.7	26.5	3.9	12.6	8.2			12.1	3.8		7.8	13.8		0.9				8.7
R-HSA-5250913	No	No	No	0.0356	0.0373				2.6	45.3			6.4		25.4			5.6						14.7
R-HSA-5250924	No	No	No	0.0998	0	1.9	0.7	6.1		19.7		2.7	5.2	8.1	8.3	13.4	6.1	7.2	6.4					14.3
R-HSA-5250941	No	No	No	0.0607	0		7.9	31	8.1	22.6	2.5		4.5	3.3		4.5	5.7	0	5.5				2	2.4
R-HSA-525793	No	No	No	0.048	0	6.3		25.9	4.2			12.7		5.7			28.8					11.8		4.6
R-HSA-5260271	Yes	Yes	Yes	0.3913	0.3436		2.1	31.2	2.6	4.5	9			11	11.9		6.7	17.3		0.2							3.5
R-HSA-532668	No	No	Yes	0.3388	0		2.4	44.9		16.5	1.1	2.5		2.5	6.8	2.3	4.8	8		4.2			1.2	2.6
R-HSA-5334118	No	No	Yes	0.1173	0	1.5	1.1	44.4		8.8	1.5		1.3	1.5		6.7	6.1	22	3.8				1.4
R-HSA-5339562	No	No	No	0.036	0	11.2					24.1	12	29.2							4.4		19.1
R-HSA-5339716	No	No	Yes	0.2513	0		0.8		4.6	12.7	3.4	1		15.1	7.2	10.7	11.7	18.2	1.1					13.7
R-HSA-5357769	Yes	Yes	Yes	0.3625	0		3.8	36.7	3.2		8	0.1		4.2	5.9	2.3	21.8	5.8	3.2	4.9
R-HSA-5357786	No	No	Yes	0.1067	0		3.2	57.3		29					10.4
R-HSA-5357801	No	No	No	0.0417	0.03			15.6			21.8			24.5	2.5					3.4	10.9					21.4
R-HSA-5357905	No	Yes	No	0.059	0			3.1		18.1			13		7.5	5.4		32.5		19.6				0.8
R-HSA-5357956	Yes	Yes	No	0.0775	0				8.5	25.9	0.9		5.6			5.3	15	19.6		12.1				7.1
R-HSA-5358346	No	No	No	0.0671	0			32.9	6.2	27.1	10.4			12.2							1.9	5.3	1.6			2.5
R-HSA-5358351	No	No	No	0.0685	0			36.7	6.4	23.5	11.8			8.7								8.9				4.1
R-HSA-5358508	No	No	Yes	0.357	0		3.5	36.7	5.8			3.6			10.2	1.6	17.3	13.2		0.7		0.8					6.7
R-HSA-5358565	No	No	Yes	0.322	0		2.2	36.4	6.3			3.8			9.7	3.2	17.1	10.5		1.3		2.2					7.3
R-HSA-5358606	No	No	Yes	0.3624	0		4.7	34.9	5.7		0.2	3.5			10.8	2.3	18.5	10.1		0.3		2.1					6.9
R-HSA-5358747	No	No	Yes	0.2513	0		0.8		4.6	12.7	3.4	1		15.1	7.2	10.7	11.7	18.2	1.1					13.7
R-HSA-5358749	No	No	Yes	0.2513	0		0.8		4.6	12.7	3.4	1		15.1	7.2	10.7	11.7	18.2	1.1					13.7
R-HSA-5358751	No	No	Yes	0.2513	0		0.8		4.6	12.7	3.4	1		15.1	7.2	10.7	11.7	18.2	1.1					13.7
R-HSA-5358752	No	No	Yes	0.2513	0		0.8		4.6	12.7	3.4	1		15.1	7.2	10.7	11.7	18.2	1.1					13.7
R-HSA-5362517	Yes	Yes	Yes	0.2197	0.2285	1.4		28			14			9.9	15.3	1.5	1.3	15.7		3				10
R-HSA-5362768	No	No	No	0.0694	0			33.1	6.2	26.7	11.7			13.4							3.3	5.6
R-HSA-5365859	No	No	Yes	0.1233	0				10.4		42.1					27.4	3.4		7.1			9.7
R-HSA-5368286	No	No	No	0.0666	0			35.6	5.1	20.6	3.7		0.6	11.5			17.3			1.7		0.7	3.1
R-HSA-5368287	No	No	No	0.0801	0			36	5.1	20.6	3.6		0.4	11.2			17.6			1.6		0.9	3.1
R-HSA-5387390	No	No	No	0.0694	0			33.1	6.2	26.7	11.7			13.4							3.3	5.6
R-HSA-5389840	No	No	No	0.0852	0			36	4.9	20.4	3.4		0.4	11.1			18			1.7		1.4	2.7
R-HSA-5419276	No	No	No	0.0715	0			36.4	5.1	20.5	4.1		0.5	11.3			17.3			1.2		0.4	3.3
R-HSA-5423646	No	No	Yes	0.119	0			32.8		10.8				4.5				31.9				6.4	1.7		3.7		8.2
R-HSA-5467337	No	No	Yes	0.2417	0	1.8	1.7	1.1	3.8	11	3.8	0.9		15.3	8.3	11.5	10.9	14.1	2.3	0.8				12.7
R-HSA-5467340	No	No	Yes	0.2417	0	1.8	1.7	1.1	3.8	11	3.8	0.9		15.3	8.3	11.5	10.9	14.1	2.3	0.8				12.7
R-HSA-5467348	No	No	Yes	0.2417	0	1.8	1.7	1.1	3.8	11	3.8	0.9		15.3	8.3	11.5	10.9	14.1	2.3	0.8				12.7
R-HSA-556833	No	No	Yes	0.185	0			42.2			4.3					10.6	16.8					9.1				5.8	11.2
R-HSA-5576891	No	No	No	0.0627	0					21	19.8			28	16.7							14.6
R-HSA-5576892	Yes	Yes	Yes	0.1435	0					19.4	8.6		5.1	4.6	19.1		0.2	8.2	12.5						8.1	14.2
R-HSA-5576893	No	No	No	0.0503	0			66.7									33.3
R-HSA-5578749	Yes	Yes	Yes	0.1971	0.1049			20.5		15.4	8.6	2.5		2.3	8.2		11.6	18.5		9.3				3.1
R-HSA-5578775	No	No	No	0.0993	0	10.2	0.9	16.4		9.9	17.2			15.7	18.9					4.7						6.1
R-HSA-5579029	No	No	Yes	0.2156	0.1328		3.8		3.9	40.9				9.7	5.5	7.7	6	2.2	6.2	14.1
R-HSA-5601884	No	No	Yes	0.2648	0.1549	2.6	2.2	34.2	4.2	5	3.9			7.9	16.6	2.1		15.3		3.9		0.6	1.4
R-HSA-5602358	Yes	Yes	Yes	0.3913	0.3436		2.1	31.2	2.6	4.5	9			11	11.9		6.7	17.3		0.2							3.5
R-HSA-5602498	Yes	Yes	Yes	0.3974	0.3334			25.4	2.5	8.7	10.9			10.6	10.8		10.4	14.6	0.4	1.7			0.4		1		2.6
R-HSA-5603041	Yes	Yes	Yes	0.3876	0.3553			29.1	2.7	6.5	11.4			10.5	11		11.4	15.1		1.4			1
R-HSA-5607761	No	No	No	0.0708	0			31.6	6.9	25.7	13			14	0.1		0.2					8.5
R-HSA-5607763	Yes	Yes	Yes	0.2829	0		1.9	15.7	0.1	15.6	8.6	2		16.6	15.4			13.5		0.7		0.1	2.7	7.2
R-HSA-5607764	No	No	No	0	0
R-HSA-5609975	Yes	Yes	Yes	0.1124	0					27.4					13.7			41.6		2							15.3
R-HSA-5610780	No	No	No	0.0816	0			36.7	6.3	25.1	13.8			10.1								7.9
R-HSA-5610783	No	No	No	0.0782	0			37.8	5.9	24.7	12.8			10			1.5					7.2	0
R-HSA-5610785	No	No	No	0.0782	0			37.8	5.9	24.7	12.8			10			1.5					7.2	0
R-HSA-5610787	No	No	No	0.0662	0			40.4	6.6	22	14.1			8.2								8.7
R-HSA-5617472	No	No	No	0.0527	0	6		15.9		40.3	9.7			12	6.5					8.3		1.2
R-HSA-5617833	No	No	Yes	0.1498	0	14	2.7	46.4						2	7.4			13.6		2.4				2.4			9.1
R-HSA-5619084	No	No	No	0.0523	0			24.9	9	21.3	15.8			16.8	1.4						2.8	5.8				2.1
R-HSA-5619102	No	No	No	0.0614	0	8.8		33.8			19			3				22		13.4
R-HSA-5619107	Yes	Yes	Yes	0.1784	0	1.9		25.1		8.8	12.8	0.1		5.4	5.4		8.3	23.6		6.6			0.8	1.2
R-HSA-5619115	No	No	Yes	0.1164	0			38.8	6.3	23.2	7.6			10.4			7	0.4			1.2	5
R-HSA-5619507	No	No	No	0.0527	0	6		15.9		40.3	9.7			12	6.5					8.3		1.2
R-HSA-5620912	No	No	Yes	0.1137	0	7.8	1.6	41.8	6.7		3.3		0.4	0.8	11.1		3.8	9.4		1.8					6.3		5.3
R-HSA-5620916	No	No	Yes	0.1409	0.0317	5.3		23.1	6.2	7.7		6.2				14	8.4	4.1	0.1	2				7.9	0		14.9
R-HSA-5620920	No	No	No	0.0132	0			50.5																49.5
R-HSA-5620922	No	No	Yes	0.2743	0			49.1		17.9				0.9		4.9	10.2	15.3				1.8
R-HSA-5620924	No	No	No	0.0204	0	7.9	18			41.7	9.4							16.2					6.8
R-HSA-5621480	No	No	Yes	0.2809	0		1.1	39.2		3.5	3.2				13.3		23.8	13.6		2.2
R-HSA-5621481	No	No	No	0.0476	0.0535				8.2	20.2	19.5			17.3	3.3		21			6.4	4.1
R-HSA-5621575	No	No	No	0.0716	0			17.9		30.1	23.1			2.9	6.5			17.8		0.5			1.2
R-HSA-5625740	No	No	Yes	0.2781	0		6	34.7	1.3	13.1		3.3	0.8			6.3	19.2			3.2				6	2.7		3.3
R-HSA-5625886	No	No	Yes	0.1695	0		2.3	42.4		16	0.6	0.5	4.9			6.9	7.8	17	1.5
R-HSA-5625900	No	No	Yes	0.2251	0		4.5	37.1	2.2	5.9	2.1						29.3			8.2					5.4	3.4	1.9
R-HSA-5625970	Yes	Yes	No	0.0789	0					17.4	16.4		8.7				12.2		8.1	18.9						14.7	3.6
R-HSA-5626467	No	No	No	0.039	0.0165												39	9.1									51.9
R-HSA-5627117	No	No	Yes	0.3195	0	1.7	5.4	38.6	2.5	19.9		2.6		3.2	3.8	3.1	17.5			0.5	1.3
R-HSA-5627123	No	No	Yes	0.182	0		5.4	34.9	1.4	11.5	5.9	1.3		3		8.8	18.6	3.5		3.5				2.3
R-HSA-5628897	No	No	No	0.0783	0.1367			57.4	0.8	33.3							4.6						3.9
R-HSA-5632684	No	No	No	0.0672	0			30.7	6.6	24.9	13.9			14.5	0.2							9.2
R-HSA-5633007	Yes	Yes	Yes	0.2987	0.1691			17.2		13.3	13			16	11.6			19.2		3.3			1.1	5.2
R-HSA-5633008	No	No	Yes	0.29	0.1223		3.3	44.9	3.3	11.4		3.2		4.2	4.6	4.7	11.8	6.8	1.8			0
R-HSA-5635838	No	No	No	0.0007	0																			100
R-HSA-5637810	No	No	No	0.096	0			11.3	0.8	26.5	1.1			6.1	8.8			26.1		2.6		0.7		16.1
R-HSA-5637812	No	No	No	0.096	0			11.3	0.8	26.5	1.1			6.1	8.8			26.1		2.6		0.7		16.1
R-HSA-5637815	No	No	Yes	0.1934	0			13.7	3.4	14.2	7	1.2		9.4	6.8	2.8		20.4	6.2	5.4		2.1		7.4
R-HSA-5651801	No	No	Yes	0.2825	0			40.6	4.1			3.6			7.4	6.3	17.3	8.5				4.5					7.7
R-HSA-5653656	No	No	No	0.0798	0	20.9		62.1																	2.9		14.1
R-HSA-5654687	No	No	Yes	0.1364	0			16.8		20.6	2.4			7.1	10.1			25.1		1.2				16.8
R-HSA-5654693	No	No	No	0.0519	0				2.9	24.5		5.3		2.9	0.3	7.6		21.9				0.6		34
R-HSA-5654696	No	No	Yes	0.132	0			17	0.1	20.4	2.4			6.9	9.8			25.5		1.2				16.8
R-HSA-5654700	No	No	No	0.0611	0				3.5	25		5.7		2		6.9		22.4						34.6
R-HSA-5654708	No	No	Yes	0.1319	0			17	0.1	20.4	2.4			6.9	9.8			25.5		1.1				16.8
R-HSA-5654716	No	No	Yes	0.1319	0			17	0.1	20.4	2.4			6.9	9.8			25.5		1.1				16.8
R-HSA-5654726	No	No	Yes	0.2137	0	0.5	3.4	22	3.4	16.9	5.3		1.6	7.4	1.8	1	8.1	0.4		2.4	8.9	5.7	8.6	2.7
R-HSA-5654727	No	No	Yes	0.2059	0	0.5	3.5	22	3.6	16.9	5.3		1.4	7.3	2	0.8	8	0.4	0.1	2.3	8.8	5.7	8.7	2.7
R-HSA-5654732	No	No	Yes	0.2062	0	0.5	3.5	22	3.6	16.9	5.3		1.4	7.3	2	0.8	8	0.4	0.1	2.3	8.8	5.7	8.7	2.7
R-HSA-5654733	No	No	Yes	0.2062	0	0.5	3.5	22	3.6	16.9	5.3		1.4	7.3	2	0.8	8	0.4	0.1	2.3	8.8	5.7	8.7	2.7
R-HSA-5654736	No	No	Yes	0.173	0		0.5	3.7	5.3	19.9	9.2	1.3		12.8	5.8	7.6		14.2	5.1	3.9		1.7		8.9
R-HSA-5654738	Yes	Yes	Yes	0.2819	0			32.7	0.2	3.1	7.2			10.8	10.9		0.4	24.7		3.2				6.8
R-HSA-5654741	No	No	Yes	0.1751	0		0.6	6.5	5.3	20.6	8.5	1.4		12	4.9	7.9		13.6	4.5	3.6		2.3		8.2
R-HSA-5654743	No	No	Yes	0.173	0		0.5	3.7	5.4	19.9	9.4	1.3		12.7	5.6	7.5		14.4	5.1	3.9		1.6		9.1
R-HSA-5655253	Yes	Yes	Yes	0.191	0.0401			31.3		7.7	3.6			4.3	11.7		1.6	26.2		1.5				12.1
R-HSA-5655291	No	No	Yes	0.1287	0			12.2	0.4	25.6	1.3			5.7	9.8			26.1		0.9				18.1
R-HSA-5655302	No	No	No	0.0398	0.0674					37								40.5						22.5
R-HSA-5655332	No	No	Yes	0.1287	0			12.2	0.4	25.6	1.3			5.7	9.8			26.1		0.9				18.1
R-HSA-5655862	Yes	Yes	Yes	0.3879	0		4.1	30.2		3.6	8.7			3.9	8.3		15.1	13.2	1.3	5.4				0.6			5.5
R-HSA-5656121	Yes	Yes	Yes	0.3856	0		4	31.7	0.1	2.8	9.1	0.4		3.3	7.8		15.7	13.2		6.1							5.9
R-HSA-5656169	No	No	No	0.0401	0	13.5		3.8	3.6	9.5	11.8	1.1	4	14.3	5.2	6.6	19.3					5.7		1.7
R-HSA-5658442	No	No	No	0.0678	0			39.6	6.3	22.5	13.1			9			2.7					0.7	6.2
R-HSA-5663084	Yes	Yes	No	0.0735	0.0584					18.6					12.2		15.8	32.2						9.6			11.6
R-HSA-5663202	No	No	Yes	0.1307	0	15.3				19.6	15			10.3	3.7	15.5		16.7						4
R-HSA-5663205	No	No	Yes	0.2913	0		0.3	38.8	0.6	15.1	1.3	4.8				3.6	12.9	4.1		1.8			3.1	0.4		5.1	8.2
R-HSA-5663213	No	No	No	0	0
R-HSA-5663220	No	No	Yes	0.2806	0	5		45.3			5.9			7.8	14.5			20.6									0.8
R-HSA-5666185	Yes	Yes	Yes	0.1521	0			14			23.1			5.2	4.5		15.5	13.4	0.8	4.2				3.2	5	11.1
R-HSA-5668541	No	No	No	0.0874	0			17.9	5.5	20.4	9.3			17.9	5.2	6.1	4.4	2		2.6	4.2	4.4
R-HSA-5668599	Yes	Yes	Yes	0.2435	0.1027			43.9						12.8	13.9		0.5	15.2		0.9				12.9
R-HSA-5668914	Yes	Yes	Yes	0.1874	0.2647			20.7		20.6				4.7	7.4	0.5	21.1	4.5	7.5	7.3							5.7
R-HSA-5669034	Yes	Yes	Yes	0.2315	0.123	1.8		31.1		5.3	8.5			14.2	11.9			19.2		0.9	0.1			7.1
R-HSA-5673000	No	No	No	0.0973	0				7.5			7.5	1.6		2.3	30.1		23		6.7				13.3			7.9
R-HSA-5673001	No	No	No	0	0
R-HSA-5674135	No	No	Yes	0.2333	0	6	3.5	12.5	1.8	4.7	1.4	1.8	2.5	5.6		3.8	12.7	5.8	0.6		9	3.1	9.8	5.7	2.2	0.5	7
R-HSA-5674400	No	No	Yes	0.184	0			32.9	2	25	16.1			11.3	2.2	2.7						7.7
R-HSA-5675221	No	No	No	0	0
R-HSA-5675482	No	No	No	0.0515	0			31	16.9	21.6		18.6	1.3		2.8									7.9
R-HSA-5676590	No	No	No	0.073	0			32	6.8	25.5	13.6			13.8	0.1							8.3
R-HSA-5676594	No	No	Yes	0.1902	0	3.8		0.4		5.2	3.1			14.1	2.5	28.9	9.1	22.8		6.6	3.4
R-HSA-5678895	No	No	No	0.0575	0			31.2	7.2	24.9	13.1			14.7	0.1						3.1	5.8
R-HSA-5683057	No	No	Yes	0.1354	0			47.8	3.5		3.7			12.2	9.8			23
R-HSA-5683826	Yes	Yes	Yes	0.2835	0					34.5	4.7			18	11.7			15.3	2.7	3.5	0.6			0.8		5.5	2.7
R-HSA-5684264	No	No	Yes	0.1646	0			37.9		2.5	4.8	2.1	1.9		1.9	7.4		25		16.3
R-HSA-5684996	No	No	No	0.018	0			54.4	16				8.6	5.6	6				1.4				7.9
R-HSA-5685938	Yes	Yes	Yes	0.1643	0			20.1		21.2				8.6	9.2			31.9		0.1			0.1	8.8
R-HSA-5685939	No	No	Yes	0.1139	0	11.4		30.9		12.4					5.6	14.5		23.9						1.3
R-HSA-5685942	Yes	Yes	Yes	0.2965	0		2.1	28.2		10.7	2.2			6.6	9.8		3.5	21	0.3	4.5				5.3	1	0.6	4.1
R-HSA-5686938	Yes	Yes	Yes	0.353	0.2577			29.6	3.6	8.6	4.6			7.6	8.9	5.5	10.1	14.1	2	0.2	0.7	1.1			1.9		1.6
R-HSA-5687128	No	No	No	0.0265	0			100
R-HSA-5688426	No	No	No	0.0838	0		3.7	3.7		22.1		15.4	16.7			16.6		8.6						13.1
R-HSA-5689603	No	No	No	0.0036	0			100
R-HSA-5689877	No	No	Yes	0.109	0			85.2												14.8
R-HSA-5689880	No	No	No	0.0229	0			46			23.1	21.6	8.8											0.5
R-HSA-5689896	No	No	Yes	0.2717	0		6.8	35.2	2.4	20.2	5.3	1.7	2.3		6	2.2	14.2	1.2		0.7			0.8	0.7
R-HSA-5689901	No	No	No	0.0985	0			38.4		37	1.2		6.1				6.2			0.6		5.2					5.3
R-HSA-5690714	No	No	Yes	0.2181	0		4.2	15.2	2.2	1.6	0.7		9.7	1.3	3	44.6	0	9.5			0.7				2.1	3.2	1.9
R-HSA-5693532	Yes	Yes	Yes	0.2738	0.1422	0.5		20.1	0.1	17.6	5.1			6.9	9.9	1.5	4	18		3.3				6.5	1.2		5.3
R-HSA-5693537	No	No	No	0.0406	0					33.5		4.7		6.7	4.7			27.3				12.3		10.8
R-HSA-5693538	Yes	Yes	Yes	0.2794	0.0761			26.7	0.5	14.7		1.5		4.5	10.5	1.4	4.1	19.4		4.6				6.7			5.4
R-HSA-5693554	No	No	No	0.0494	0					36.2		4.2		7.8	4.5			26.4				12.7		8.3
R-HSA-5693565	No	No	Yes	0.2265	0.0254	3.1	2.5	6.7	2.7	23.4	6	1.1	3.3	5.7	7.6			11.1	3.5	6.4			3	4.1	2.1	3.2	4.6
R-HSA-5693567	Yes	Yes	Yes	0.2381	0.0304			22.2		21		1		7.5	11.9			21		5.2				10.1
R-HSA-5693568	No	No	No	0.0406	0					33.4		4.6		6.7	4.9			27.1				12.4		10.8
R-HSA-5693571	No	No	No	0.092	0			14.2		44.9				6.4	6.5			4.4						23.6
R-HSA-5693579	No	Yes	Yes	0.1609	0			17.4		23.4				8.7	9			31.9					0.1	9.4
R-HSA-5693606	No	No	Yes	0.2278	0.0247	3	2.4	7.1	2.8	23.1	5.7	0.9	3.3	5.5	7.5			11.3	3.6	6.2			3.1	4.4	2.1	3.3	4.6
R-HSA-5693607	Yes	Yes	Yes	0.2153	0.0796		1.2	8.9		33		1.5		8.5	9			20.6		6.4				10.9
R-HSA-5693616	Yes	Yes	Yes	0.1609	0			17.2		23.7				8.7	9.1			31.8					0.1	9.4
R-HSA-5694530	No	No	No	0.0569	0.0029	3.7		8.9	5.3		3.9		8	11.8		25.3	2.2							12.8	2.7		15.4
R-HSA-5696394	No	No	Yes	0.3073	0			52				0.7			3.4	5.8	13.6	18.3		2.3				0.9			3
R-HSA-5696395	No	No	Yes	0.2918	0			52.2							6.2	5.3	11.8	21.1									3.5
R-HSA-5696397	Yes	Yes	Yes	0.3278	0		3.7	37.4	2.9		2	3.5			9.1	4.3	15.7	7.6		4.5		2.4	0.3				6.5
R-HSA-5696398	No	No	Yes	0.3111	0			47.4				2			9.4	4.6	13.4	17.5		0.9				1.6			3.4
R-HSA-5696399	No	No	Yes	0.2857	0			49.9							6.9	3.9	14.3	19.4						1			4.7
R-HSA-5696400	No	No	Yes	0.3952	0		0.2	48.4							7.2	7.6	13.4	15.6		3							4.5
R-HSA-597592	No	No	Yes	0.2189	0			10.1		12.7	7.4			12.9	11	10.2		15.4	0.7	0	1.8			17.7
R-HSA-606279	No	No	No	0	0
R-HSA-611105	No	No	No	0.0741	0.0812			36.6	9	28.4			0.6	3									3.8			11.8	6.8
R-HSA-622312	Yes	Yes	Yes	0.3636	0		0.3	23.3		5.1	8.4			9.2	17.5			22.4						7.5		2.7	3.6
R-HSA-674695	No	No	Yes	0.1755	0.1348	0.9		32.9	4.8	2.4	8.1			1	16.4		15.9	15.4	0					2.2
R-HSA-6781823	No	No	Yes	0.3069	0		0.5	49.7			1.1				8.5	0.7	14	18.1		5.2				2.3
R-HSA-6781827	No	No	Yes	0.3354	0		1.1	49.4				1			10.3	1.8	17	15.6		3.8
R-HSA-6782135	No	No	Yes	0.3665	0		1.7	47.5			1.3	0.6			10.5	2.4	16.7	15		4.4
R-HSA-6782210	No	No	Yes	0.3747	0		2	46.6			1.6	1.1			10.5	2.4	16.3	14.7		4.8
R-HSA-6782315	No	No	Yes	0.2496	0			49.9	3.1	3.1							28.3	15.5
R-HSA-6783310	Yes	Yes	Yes	0.404	0		2.8	38.1		2.1	3.8			1.6	9.6		12.2	20.2		4.8							4.9
R-HSA-6783589	No	No	No	0	0
R-HSA-6783783	No	No	Yes	0.2508	0			47.4			2.2			9.9	4.3		16	14.4		3.1				2.7
R-HSA-6784531	No	No	Yes	0.2666	0			40.9			6.3	1.4			4.8		14.5	24.6		3.5				0.4			3.6
R-HSA-6785807	No	No	Yes	0.1008	0			39.5	3.6					1.5	7.3			44.7	3.3
R-HSA-6790901	No	No	Yes	0.2805	0			44.5	2	3		5.5				4.2	21.6	11.3					0.6				7.2
R-HSA-6791226	No	No	Yes	0.2536	0.024			43.2		11.9		6				9.4	15.8			1.7			1.2			2.3	8.7
R-HSA-6791312	No	No	Yes	0.223	0			31.7		4.6	6.7			4.7	9.3			28.9	2.5	1.1				10.5
R-HSA-6794361	No	No	Yes	0.2549	0.1378		0.9	50.1		20.9				4.1	4		5.5	13.4									1.2
R-HSA-6794362	No	No	Yes	0.441	0.1782		3.7	49.8		25	1.5				3.5		9	7.6
R-HSA-6796648	Yes	Yes	Yes	0.2968	0.0661			33.4		3.8	8.7			6.6	15		5.8	23		2.8				1
R-HSA-6798695	Yes	Yes	Yes	0.2739	0			26.2		14.4	2.7			9.2	9.4		8.5	19.4		2.8				7.4
R-HSA-6799198	No	No	No	0.0194	0		0.9	20.5	16.3	24.8	0.3			4.9				10.3					2.8			14.1	5.1
R-HSA-6802946	No	No	Yes	0.2341	0	8.3	4.1	14.3	2.9	6.1	2.2	2.2	5.7	6.7		7.4	15.4	5.5		0.4	0.6		0.8	3.1	2.7	1.4	10.2
R-HSA-6802948	No	No	Yes	0.1977	0	6	4.1	16.7	1.7	5.4	0.7	0.1	4.6	8.9		4.4	22.2	8.1	0.1						3.6		13.3
R-HSA-6802949	No	No	Yes	0.2015	0	5.7	2.7	8.1	4.2	11.1	9.5	4.1	4.9	14	2.4	10.7	7.3		0.9		0.5				1	2.4	10.5
R-HSA-6802952	No	No	Yes	0.1092	0	15.1	1.4	12	4.3	6.3	2.9	0.7		12.1		8.7	18.9		1.4			0.7		0.3	0.5	3.2	11.5
R-HSA-6802955	No	No	Yes	0.2341	0	8.3	4.1	14.3	2.9	6.1	2.2	2.2	5.7	6.7		7.4	15.4	5.5		0.4	0.6		0.8	3.1	2.7	1.4	10.2
R-HSA-6802957	No	No	No	0.0977	0	11		5.1	5.4	9.6	9.7	0.9		19.1	0.3	12	6.2					2.7		1.5		4.6	12
R-HSA-6803157	No	Yes	No	0.0771	0			24.2	2.1	13.2	5.3						13.7	31.3					0.7	9.5
R-HSA-6803204	No	No	Yes	0.1381	0			29.9	10.9	15.2	4.4		3				14.2	6.5	1.3			9				1.2	4.3
R-HSA-6803205	No	No	No	0.034	0.0736			100
R-HSA-6803207	No	No	No	0.065	0			19.8			6.3	26			7.7	13.3	15.8		11.1
R-HSA-6803211	No	No	Yes	0.1781	0	6.1	0.7	53.2	0.8	10				11		0.5	4.1	12.1			1.5
R-HSA-6803529	No	No	Yes	0.3753	0			47.9		11.6					6.6	4.3	12.2	17.2		0.2
R-HSA-6804114	No	No	No	0.0686	0	2.8	1.6	27	7.5		12.1	1		6.7				14.7							4.6	1	20.9
R-HSA-6804115	Yes	Yes	Yes	0.2196	0			41.8							7.6		3.5	32.8						8.5			5.8
R-HSA-6804116	No	No	No	0	0
R-HSA-6804756	No	No	Yes	0.1839	0			9		23.2	8.9			16.4	7.5			20.5		2.5	3			9
R-HSA-6804757	Yes	Yes	Yes	0.2472	0.2633			8.7	2.5	15.4	18.1	1.5	4.1	11	13.2			14.7		3.6	2.3			4.8
R-HSA-6804758	Yes	Yes	Yes	0.3783	0		3.2	34.5	0.3		8.9	1.8		6.9	10.5	5.4	8.9	14.3		4.8		0.4
R-HSA-6804759	No	No	No	0	0
R-HSA-6804760	Yes	Yes	Yes	0.1399	0				3.9	28.2	15.1			13.8	0.3			19		10.8	7.7			1.2
R-HSA-6805567	Yes	Yes	Yes	0.1864	0	1.3		40.2	5.7									45						7.8
R-HSA-6806003	Yes	Yes	Yes	0.2757	0.2897			4.5	1.5	18.5	18.5	1.4	1.9	14.5	15.2			13.2		3.6	0.8			6.5
R-HSA-6806667	Yes	Yes	No	0.0433	0													100
R-HSA-6806834	No	No	Yes	0.121	0	7.2			3.2	13.1	7.4	3.7		14	7.3	6	11.6	13	4.3	2.5		0.2	0.5	6
R-HSA-6807004	No	No	No	0.0785	0	7.6		8.9	4.6	19.5	6.2	1.8		10.4	2.2		14.4	11.2	2.7	5.9		4.6
R-HSA-6807070	No	No	No	0.0947	0			47.8									34.1	9.1	1.1			7.9
R-HSA-6807505	No	No	No	0	0
R-HSA-6807878	No	No	No	0.0351	0			100
R-HSA-6809371	Yes	Yes	Yes	0.1864	0	1.3		40.2	5.7									45						7.8
R-HSA-6811434	No	No	No	0.0188	0			100
R-HSA-6811436	No	No	No	0.0778	0	2.3	10.9									11.2		29.1							4.3	4.9	37.3
R-HSA-6811438	No	No	No	0.036	0			52.9								0.3				0.2			17.7		10.8	18.1
R-HSA-6811440	No	No	No	0.0045	0													73.9						26.1
R-HSA-6811442	No	No	No	0.0924	0	22.7		11.4	0.8					3.6	17.6	24.8								6.1	2.1		10.7
R-HSA-6811558	No	No	Yes	0.239	0			21.3		25	7.5		0.6	12.6	10.9	11		5.1						6
R-HSA-6814122	No	No	No	0.0623	0			58.7		20.4						10.1		10.8
R-HSA-68689	No	No	Yes	0.2459	0			43.1		12.7	1.2					24.2	6.8					3.5		8.6
R-HSA-68827	No	No	No	0.0641	0			31.4	6.8	24.6	14			14.3	0.4						0.4	8.1
R-HSA-68867	No	No	No	0.0569	0			32	7.5	24.2	13.4			13.8							1.4	7.7	0
R-HSA-68875	No	No	Yes	0.1912	0					32.1	2.8	4.8		8.9	10.6			19.7						21.2
R-HSA-68877	Yes	Yes	Yes	0.2152	0.0252	6.1		30.8		7.4	8.6			10.3	9.9			19.5		2.7				4.7
R-HSA-68882	No	No	Yes	0.1368	0			57.4			2.6						8	30						2
R-HSA-68884	No	No	No	0.0862	0	5		8.7		24	7.7			10.5	11.5			22.9					0.2	9.4
R-HSA-68886	No	No	Yes	0.2144	0			50.3							7.9		4.5	27.8						9.5
R-HSA-68949	No	No	No	0.0777	0			35.2	6.5	23.5	12.9			11.1			2.5					8.4
R-HSA-68962	Yes	Yes	Yes	0.3467	0		0.5	42.3	2.6			1.5			10		17.9	16.9		0.7		1.4					6.3
R-HSA-69002	No	No	No	0.0743	0			35.3	7.4	23.2	11			10.5			3.9					8.7
R-HSA-69017	No	No	No	0.0615	0			33.9	4.4	22.6	18.1			13.9								7
R-HSA-69052	No	No	No	0.0696	0			37	4.7	21.9	16.4			10.7			2.6					6.8
R-HSA-69091	No	No	No	0.0813	0			40.6	10.6	2.1		0.2			19.5	9.9	10.9						6.3
R-HSA-69109	No	No	No	0.0813	0			40.6	10.6	2.1		0.2			19.5	9.9	10.9						6.3
R-HSA-69166	No	No	Yes	0.2981	0		2.4	35.3	6.3			3.2			11.7	5	18	5.8				5.1					7.1
R-HSA-69183	No	No	Yes	0.3048	0		2.6	35.3	6.1			3			11.7	4.8	18.8	5.5				5.3					7.1
R-HSA-69186	No	No	Yes	0.3516	0		3.1	35.1	5.4			3.6			12.1	2.8	18	7.6		1.5		3.8					7
R-HSA-69190	No	Yes	Yes	0.35	0		2.8	36.4	5.2			3.1			10.4	1.7	18.8	8.8		2.3		4.9					5.6
R-HSA-69202	No	No	No	0.0873	0			37.8	3.6	23.3	10.8			9.8			5.7					9
R-HSA-69205	No	No	Yes	0.1761	0			34.9		10.9				6.8	0.6			41.2						3	2.6
R-HSA-69206	No	No	No	0.0338	0			100
R-HSA-69231	No	No	Yes	0.1039	0			9.8	4.3	18.8			0.3	10	2	17.2		19.7						10.1	3.5	4.3
R-HSA-69236	No	No	Yes	0.1039	0			9.8	4.3	18.8			0.3	10	2	17.2		19.7						10.1	3.5	4.3
R-HSA-69239	No	No	No	0.0808	0			41.1	4.7	18.7	12.4			6.3			9.5					7.3
R-HSA-69242	No	No	Yes	0.134	0			60			0.4						20.6	19.1
R-HSA-69273	No	No	Yes	0.2435	0			52.2							6		8.1	33.8
R-HSA-69275	No	No	Yes	0.1163	0			55.5	4.4	22.4	2.9						8.9	1.3				4.6
R-HSA-69278	No	No	Yes	0.2835	0			49.4							9.6		3.3	30.3						7.3
R-HSA-69306	No	No	No	0.0784	0			38.8	5.6	19	12.4			8.3			8.9					7
R-HSA-69416	No	No	Yes	0.2368	0		4.9	42	1.2	14	6.8	3.9		4.7		9.3	10.8		1.9	0.5	0
R-HSA-69473	No	No	Yes	0.1781	0			48.2						0.9	11			22						18
R-HSA-69481	No	No	No	0.0621	0			60.3	1.8	12.9	22.9												2.2
R-HSA-69541	No	No	No	0.0625	0			34.8	5.9	24.2	14.4			12.8								7.9
R-HSA-69563	No	No	No	0.0617	0			35	5.4	25	14.2			12.7								7.3	0.3
R-HSA-69580	No	No	No	0.0617	0			35	5.4	25	14.2			12.7								7.3	0.3
R-HSA-69601	No	No	No	0.0653	0			31.3	6.8	25	13.4			14	0.7						0.5	8.2
R-HSA-69610	No	No	No	0.0653	0			31.3	6.8	25	13.4			14	0.7						0.5	8.2
R-HSA-69613	No	No	No	0.0653	0			31.3	6.8	25	13.4			14	0.7						0.5	8.2
R-HSA-69615	No	No	No	0.0617	0			35	5.4	25	14.2			12.7								7.3	0.3
R-HSA-69618	No	No	Yes	0.1851	0			30.5		9	1.9			3.9	10.2			28.4						16.1
R-HSA-69620	No	No	Yes	0.1607	0			54			5.6							33						7.4
R-HSA-69656	No	No	No	0.092	0			39.9	2.9	22.3	9.2			7.9			8.1					9.7
R-HSA-70171	No	No	Yes	0.1888	0		1.4	29.2		20.1		8.5	0.4	7	6		9.4	3.8				7.7			3.5		2.9
R-HSA-70221	No	No	Yes	0.3243	0.0197	2.5	2.6	28.9	0.4	10.2	5.3	0.3	1.8	0.6	9.3	7.8	6.9	0.6	1.2	1.4	0.8			0.8		7.3	11.3
R-HSA-70263	No	No	Yes	0.1731	0			41.1		38.4				8.1	2.4							10
R-HSA-70268	No	Yes	Yes	0.18	0		6.1	33.4		31.7	1			6.3	5.3	0.4		0.6	3.8	0.4			2		3.5	5.3
R-HSA-70326	No	No	Yes	0.2278	0		2.4	29.9		22		6.6	1.7	7.4	4.8		10	3.5				7			2.7		2
R-HSA-70895	No	No	Yes	0.1707	0.1138	3.6		41.3		6.3						9.7		24.7						7.6	5.6		1.1
R-HSA-71240	Yes	Yes	Yes	0.1946	0		2.2		0.9	30.2	10.4		8.8	10.9	15.4		2.7		7.5	11
R-HSA-71291	No	No	Yes	0.2355	0			39.4	0.7	20		4.9				6.7	10						4.2			5.4	8.7
R-HSA-71336	Yes	Yes	Yes	0.192	0			26.3		10.1		5.1		10.9	14.1			12.3		3.7			0.4	11.2			6
R-HSA-71387	Yes	Yes	Yes	0.1646	0.1061			14.7		17.4		4.6		12.2	20.5		6.3	5.2		0.4			1.1	4.8			12.7
R-HSA-71403	No	No	Yes	0.2466	0			50.6		27.7	5.5	1.8		0.5			5.4	5.6				1.4	1.4
R-HSA-71406	No	No	Yes	0.3053	0		4.9	39		27.3	5.4	2.8		5.7			6.3			0.8		2.1	1.5		1.2	2.9
R-HSA-72086	No	No	Yes	0.2407	0.0131			43.2	4.1	5.1		4			7.3	5.8	19.1	9.6		0		2
R-HSA-72163	No	No	Yes	0.3374	0			46.5	1.5	11					5.2	6.6	12.8	15.3				1.2
R-HSA-72165	No	No	Yes	0.2919	0	0.3		45.2	2.4	15.4		1.4			1.1	6	13.7	6.8	2.3	1.1		3.3		1
R-HSA-72172	No	No	Yes	0.3297	0			46.3	1.6	11					5.3	6.5	12.8	15.3	0.1			1.2
R-HSA-72187	Yes	Yes	Yes	0.2141	0			45.3								8.9	8.6	35.5	0.9	0.8
R-HSA-72202	Yes	Yes	Yes	0.2883	0			45.4									14.2	34.6		5.8
R-HSA-72203	Yes	Yes	Yes	0.311	0			47.6							4.3	6.2	17.5	23.6		0.6
R-HSA-72306	No	No	Yes	0.2848	0			47.5			1.6	1.9			3.7		19.7	24.2		1.4
R-HSA-72312	No	No	Yes	0.266	0			43.3		11.5		6.1				8.2	17.6			1.6			1.4			1.9	8.5
R-HSA-72613	No	No	Yes	0.2783	0			42.5		15.8		5.9				8.7	13			1.2			1.5			3.5	8
R-HSA-72649	No	No	Yes	0.3391	0	2.7	2.8	36.2	0.1	18.6	2.9	3.9			0	5.4	13.2	1.1		1.2			0.5			4.5	6.8
R-HSA-72662	No	No	Yes	0.339	0	2.7	2.8	36.2	0.1	18.6	2.9	3.9			0	5.4	13.2	1.1		1.2			0.5			4.5	6.8
R-HSA-72689	No	No	Yes	0.2583	0			41.7		14.8		6.4				9.6	12.5			1.2			1.7			3.6	8.5
R-HSA-72695	No	No	Yes	0.3168	0	3	2.3	35.7	0.2	18	3.4	4.2				6	14.1	0		1.1			0.4			4.4	7.3
R-HSA-72702	No	No	Yes	0.3412	0	2.3	2.6	36.8	0.1	18.5	2.8	4				5.4	13.3	1.3		1.2			0.6			4.3	6.8
R-HSA-72706	No	No	Yes	0.2769	0			42.4		15.7		6				8.8	12.9			1.2			1.5			3.6	8
R-HSA-72737	No	No	Yes	0.2783	0			42.5		15.8		5.9				8.7	13			1.2			1.5			3.5	8
R-HSA-72764	No	No	Yes	0.209	0.1614			42.7		11.8		6.3				11.6	12.2			1.2			1.3			3.1	9.7
R-HSA-72766	No	No	Yes	0.285	0			40.9		18.1	0.4	5.4				6	12.6			0.9			2.7			4.8	8.3
R-HSA-73614	Yes	Yes	Yes	0.207	0			23.9		9.9	9.8			10.8	9.4			18.7		11.2	2.5			3.7
R-HSA-73728	No	No	Yes	0.1295	0	2.6		45	2.3		0.8			9.5	2.2		7.8	25.3	0.6	2.2			1.8
R-HSA-73762	No	No	Yes	0.3058	0			50.2							5.7	0.4	20.2	23.5
R-HSA-73772	No	No	No	0	0
R-HSA-73776	No	No	No	0.0652	0	4		11.9	9.2	9.8	12.1		6	4.9	11.7		4.5	15.9		1.5			1.2	7.4
R-HSA-73779	No	No	No	0.0652	0	4		11.9	9.2	9.8	12.1		6	4.9	11.7		4.5	15.9		1.5			1.2	7.4
R-HSA-73780	No	No	No	0.0113	0.0089			89.5	10.5
R-HSA-73817	No	No	Yes	0.1711	0		5.1	20.7	5.1	14.6		2.8	1.4	16.2			23.9			2.3		7.9
R-HSA-73854	No	No	No	0.044	0			50.6	7.1								16.8	21.5					4.1
R-HSA-73856	Yes	Yes	Yes	0.2288	0		0.1	46.4		1.9						9.8	8.9	30.4	2	0.3
R-HSA-73857	Yes	Yes	Yes	0.2625	0			10.4		21.1	11.2			11.1	12.9		2.1	18.8		2.9				9.5
R-HSA-73863	No	No	Yes	0.1465	0			49.1	6.3		1.1	3				1.9	18.1	20.5
R-HSA-73864	No	No	No	0.0435	0			50.3	7.3								16.8	21.3					4.3
R-HSA-73884	No	No	No	0	0
R-HSA-73886	No	No	Yes	0.1581	0.1581			42.6	5.4						12.7		9.4	18.6									11.3
R-HSA-73887	No	No	No	0.0294	0			56.7																			43.3
R-HSA-73893	No	No	No	0.0542	0	0.5		24.8		14.7	5.5	1.5					12.3	22.2					1.3				17.2
R-HSA-73894	No	No	Yes	0.2072	0.1437			17.4	2.7	23.1		0.1			8.9		8.9	21.7		1.7			0.7	6.9			8
R-HSA-73927	No	No	No	0.0543	0			45.1	3					5.5		2.7	9.8	28.8					5
R-HSA-73928	No	No	No	0.064	0			50.4	0.8					3.5			14.6	25.8	2.7				2.2
R-HSA-73929	No	No	No	0.0543	0			49.2	0.8					3.6			13.7	28.8	1.1				2.9
R-HSA-73933	No	No	Yes	0.3162	0			38.7	3.4			3.7			6.5	18.7	7.7	10.6				2.8					7.9
R-HSA-73980	No	No	No	0.0862	0.0436			49.1	5.9	23.9							1.3						4.3		3.8	11.7
R-HSA-74158	No	No	Yes	0.1974	0.0192	0.9	5.2	40.5	4.7	7.8	3.8			3.9	8.2		13.4	7		0.3			0.9	3.3
R-HSA-74160	Yes	Yes	Yes	0.2613	0			17.1		15.9	10.8			10.1	12		3.6	19.7		2.8				8.1
R-HSA-74217	No	No	No	0.0157	0	12.2	6.7	14.5	0.1	2			13.1	2.7	0.5	14.5		26.5				7.3
R-HSA-74259	No	No	Yes	0.1543	0			14.3	3.3	18.8	2.5		2.5	6.4	2			31.9		1.7		1.9		4.5	0.3		10
R-HSA-74751	No	No	Yes	0.1599	0			36.2		21	14.7			11		8.7								8.3
R-HSA-74752	No	No	Yes	0.3526	0			50.1		1.7	10.3				1.9	14.4	4.1	12.3									5.1
R-HSA-749476	No	No	Yes	0.1873	0.0581	1.8	4.4	39	4.7	8.1	2.5			2	6.9		11.3	7.8					1.5	2.8	3.5	2.1	1.6
R-HSA-75035	No	No	Yes	0.2324	0			47.8		16.1	11				4.3			7.4		1.1				7		3.6	1.6
R-HSA-75067	No	No	Yes	0.2339	0			47.8		1.8					8.3	4.7	14	21.6						1.7
R-HSA-75105	No	No	Yes	0.1455	0			33.9	5.9			12.5				26.8	5.7							6.2			9.1
R-HSA-75153	No	No	No	0.04	0	0.4	3.9	17.7	1.4	16.7	13.7	3.5	0.4	2.9	1.6	1.7	4.4	11.8	2.3	1.1				3.1	3.8	1.6	8
R-HSA-75205	Yes	Yes	Yes	0.3072	0.0719		1	25.1	0.2	33.5	8.5		1.6	6.8	1.7			7	0.9	4.9	1.2					5.1	2.5
R-HSA-75815	No	No	No	0.0592	0			31.5	7.3	24.7	13.4			14.1	0.5						1.7	6.9
R-HSA-75876	No	No	Yes	0.2305	0.2285			35.6	4.2	4.1		8.3				14.1	13.3			1.6				7.6		4.8	6.4
R-HSA-75892	No	No	Yes	0.1432	0			42.6		4.9	13.8	13.7		2.7		1.7		5.9	6.8				7.8
R-HSA-75893	No	Yes	No	0.0188	0													81.6						18.4
R-HSA-75953	No	No	No	0.0652	0	4		11.9	9.2	9.8	12.1		6	4.9	11.7		4.5	15.9		1.5			1.2	7.4
R-HSA-75955	No	No	Yes	0.2427	0.0398			39.2	4		5.4				15.6		21.3	13.1	1.3
R-HSA-76002	No	No	No	0.0989	0.0531			30.2								2.5	13.1	31.6									22.6
R-HSA-76005	Yes	Yes	No	0.091	0.0175													70.9									29.1
R-HSA-76009	No	No	No	0.056	0		2	6.4		8.8	7.7		9.5	10.2	11.4		2.4	8.8	0.7	7.6			2.3	1	3.4	6.2	11.5
R-HSA-76042	No	No	No	0.0652	0	4		11.9	9.2	9.8	12.1		6	4.9	11.7		4.5	15.9		1.5			1.2	7.4
R-HSA-76046	No	No	Yes	0.2148	0		5.2	38.5	4.7	4.8	5.5			6.3	9		14.7	6.3		1.4				3.5
R-HSA-76061	No	No	Yes	0.2288	0		4.6	38.4	5.2	11.3	4.2	0.8	0.3	3.2	7.4		12.7	5.3		1.3		2.3	2.1	0.9
R-HSA-76066	No	No	Yes	0.2043	0.0511	5.9	3.5	40.1	2.9	6.6	6.9			7.7	7.4		7.5	10.6		0.9
R-HSA-76071	No	No	No	0.0792	0	10.5		32.5		6.6	9.8			18	7.7			9.4						5.4
R-HSA-77075	No	No	Yes	0.215	0	1.1	2.6	32	5	9.1	4.2	2	0	3.7	7.1	5.2	17.6	3.1	2	1.4		1.5		2.2
R-HSA-77289	No	No	Yes	0.1782	0			26.2	3.5	34.2	9.5			12.3	6.7							5.7				1.8
R-HSA-77387	Yes	Yes	Yes	0.1843	0	4.7		28		15.9				12.9	7.3			24.5		2.8				3.9
R-HSA-774815	No	No	No	0	0
R-HSA-77588	No	No	No	0.0821	0		1.8	34.2	6.4	22.8		0.5	4.2	4.5	5	2.2	8.8	2		3.5			4.1
R-HSA-77595	Yes	Yes	Yes	0.1439	0			43.2						3.1	5.7		9.8	32.4						5.8
R-HSA-844456	Yes	Yes	Yes	0.361	0			16.1		20.7	3.2			11	15.9			22.9			3.8			6.4
R-HSA-877300	Yes	Yes	Yes	0.1557	0						45.1	5		26.5	8.8					5.5	5.9			3.3
R-HSA-877312	Yes	Yes	Yes	0.1224	0.0787			40.9	1.9		2.7	6.8	0.6	0.2	9.8	9.9	19.2		4.3	3.6
R-HSA-879415	Yes	Yes	Yes	0.1673	0					35.9					24.6		1.7	24.7					1.8			8.2	3.1
R-HSA-881907	No	No	Yes	0.1049	0	1.3	2.6	17.3	7	18.2	6.6	2.1		9.3	3	11.6	0.8	5.6	3				1.9	9.6
R-HSA-8848021	No	No	Yes	0.1206	0	2.3	2	27.6	4.9	24.4	5.5		0.2	8.8	2		12.8	5.6		2.4			0.5	0.8
R-HSA-8849471	No	No	Yes	0.1316	0	4.6	5.1	22.9	2.9	13.7	1.4		1.6	6.7		4.2	20.5	4.2		1				3.3		0.4	7.4
R-HSA-8849932	No	No	Yes	0.3063	0.1981	5.3	1.4	49.8		17.2				5.8	5.9			11.4						3.3
R-HSA-8851708	No	No	Yes	0.184	0.2193			43.8	4.8	10		3.6			8.1	4.5	14.2	9.2				1.7
R-HSA-8851805	No	No	No	0.0781	0				6.1	16.7		8.6		3		18.7		17.4	3.2					26.3
R-HSA-8852135	No	No	Yes	0.1159	0					39.2					22.7			10.4						27.7
R-HSA-8852276	No	No	No	0.0008	0			100
R-HSA-8853338	No	No	Yes	0.1287	0			12.2	0.4	25.6	1.3			5.7	9.8			26.1		0.9				18.1
R-HSA-8853659	No	No	Yes	0.1373	0			17		13.7	34.9			19.8	6.1			4.8						3.7
R-HSA-8854050	No	No	No	0.0772	0			34.1	6.4	25.2	13.6			12.4								8.3
R-HSA-8854214	No	No	Yes	0.111	0			43.1	2.6	13.6	12.4		4.1				9.2	2.8							10.2		2.1
R-HSA-8854518	No	No	Yes	0.1333	0	4.1		43.1	4.9		10.6			2	11.4		10.3	7.4	1.9	4.4
R-HSA-8854691	No	No	No	0.0624	0			44.5			1.4	12.4		20.8	3.3	9.6			1.1		3			3.9
R-HSA-8856688	No	No	No	0.0444	0	13.2		54.5																			32.3
R-HSA-8856825	No	No	Yes	0.3376	0		4.3	31.9	0.7	15.1		0.4	1.7	7.2	1.6	7	18.7	5.9			1			4.6
R-HSA-8856828	No	No	No	0.0294	0			38			17.5							15.7	0.6			4.9		6.1		17.2
R-HSA-8862803	No	No	Yes	0.1772	0.0061			37.1	0.3	37.2			1.3					5.1			5.5					4.1	9.2
R-HSA-8863678	No	No	Yes	0.1772	0.0061			37.1	0.3	37.2			1.3					5.1			5.5					4.1	9.2
R-HSA-8863795	No	No	Yes	0.1386	0			31.1	1	3.1	10			26.2	10.5					11.2		6.8
R-HSA-8864260	No	No	Yes	0.1631	0	4.1	0.2	25.4	1.1		9.7	2.7	2.3	4.3	3.3	1.9	6.6	13.2	4.3	0.9			1.2	2.5	4.1	5.6	6.7
R-HSA-8866427	No	No	No	0.0973	0	1	2.7	39.1	22.7	22.3		5.4					5.6							1.2
R-HSA-8866652	No	No	No	0.025	0					34.6														65.4
R-HSA-8866654	No	No	No	0.0609	0			25.1		39.6					14.1									21.2
R-HSA-8868766	No	No	Yes	0.1651	0	1		35.6	2.2			3.9		7.3		3.5	38.5						8.1
R-HSA-8868773	No	No	Yes	0.266	0			43.2		11.5		6.1				8.3	17.4			1.7			1.4			1.9	8.5
R-HSA-8873719	No	No	Yes	0.2794	0		0.5	41.8				1				8.1	24.9	3.6	3.6	6.2				8.2			2.1
R-HSA-8874081	No	No	Yes	0.1831	0.0153			38.4	0.1			8.1		8.7	12.8			11.3		1.4				12.1			7.1
R-HSA-8875360	No	No	No	0.0008	0					88.3	11.7
R-HSA-8875555	No	No	Yes	0.112	0	3.4	2.5	1.6			1.8			20.9	11.8		37.3	10.3	2.1		3			5.2
R-HSA-8875878	No	No	Yes	0.1358	0	6.9		17.2	1.1	5.9				14.9	9.9		26.9	10.5	0.6	0.9				5.3
R-HSA-8876198	No	No	Yes	0.1363	0	7	3	16.6	3.8	4.2	2	2.7	2.4	10.3	1.7	14.9	14.1		1.1					3.5		3.3	9.5
R-HSA-8876384	No	No	No	0.0611	0			1.4	2.5	33.7	11.8			3.6				20.9		13.6		12.6
R-HSA-8876725	No	No	Yes	0.3895	0			48.2		9.1		2.3			4.1	3.3	16.2	12.3		1		0.8					2.7
R-HSA-8878159	No	No	Yes	0.2017	0			53.7	1.5		0.6				4.6		17.1	19.4			3.1
R-HSA-8878166	No	No	No	0.0561	0			36.8	3.8	25.4	14			11.4								8.5	0.2
R-HSA-8878171	No	No	No	0.095	0.0171	8.1		7.9	6.9	34.1	6.7		0.7	15.1	7.9		3.3	2.1		5.1	0.3		1.7	0.2
R-HSA-8934593	No	No	Yes	0.1434	0.1657	3.1		25.8	1.2	8.1	10			12	6.7	0.5		24.5						8
R-HSA-8934903	No	No	No	0.0048	0				100
R-HSA-8936459	No	No	Yes	0.1072	0			31.4		37.3	11.4			12.5						2.9		4.3
R-HSA-8939211	No	No	Yes	0.154	0			25.2	3.3	27.1	11.9			10.7	7.5	3.9						4.7		5.6
R-HSA-8939236	No	No	No	0.0506	0			31.4	6.9	19.5	17.8			15							9.4
R-HSA-8939243	Yes	Yes	Yes	0.2196	0.0603	4.6		13.3	3.3	16.8	15.4			18.2	8.4			11.4	0.3	3.6				4.8
R-HSA-8939902	No	No	No	0.0685	0			33.5	6.1	23.2	14.1			12.5			2.6			0.3		6.3	1.5
R-HSA-8940973	No	No	Yes	0.1995	0			7.8	4.3	7.5	6			8.3	7.8	13.6		5.6		1.1			5	23.2		3	6.8
R-HSA-8941326	No	No	Yes	0.1998	0			11.3	5.4	11.2	7.8			8.8	7.3	11.8		5.1					1.3	20.3		4.1	5.8
R-HSA-8941856	No	No	Yes	0.1036	0			30.4		28	20.1			13.5	3.6							4.4
R-HSA-8941858	No	No	No	0.0557	0			39.7	7.6	26.8	10.6			6.4							5.9	3.1
R-HSA-8943724	Yes	Yes	Yes	0.3136	0			21.7			21	0.2			13.6		21.7	14.5	0.3								6.9
R-HSA-8948216	No	No	No	0.0239	0			18.5	32.9									2		42				4.7
R-HSA-8948751	No	No	No	0.051	0			31.1	7.2	23.4	14.1			15							1.9	7.4
R-HSA-8949215	No	No	Yes	0.1554	0			38.8	1.6	23.2	3.6	0.6		8.2			15.3			4.5		1.9	2.4
R-HSA-8949613	No	No	Yes	0.195	0			44.4	5.7	28.2						0.4	6.6						3			7	4.7
R-HSA-8949664	No	No	Yes	0.1338	0			40.9		21.5	1.6	0.3		7.3			19.9			5.4		3
R-HSA-8950505	No	No	Yes	0.1443	0			55.7		18.4	8.5						2.2	15.2
R-HSA-8951664	No	No	No	0.0207	0			51.7			47.2													1.1
R-HSA-8951936	No	No	Yes	0.2732	0	8.1	1.9	15.9	3.4	7.5	10.6			21.7	12.4	8.5	1.8	6.8		0.6			0.7
R-HSA-8953750	No	No	Yes	0.1431	0			19		22.8				9.3	6.9			24.2						17.8
R-HSA-8953854	No	No	Yes	0.3106	0			50.3		12.4		1.9				6.8	18.2	9.5		0.5			0.4
R-HSA-8953897	No	No	No	0.0528	0			32	11.5					20.5				19.8		1.2			15
R-HSA-8955332	No	No	No	0.0748	0			22.6										48.7					2	8.9			17.8
R-HSA-8956319	No	No	Yes	0.3198	0.1836			18.8		9.9	14.3			11.3	9.5		0.8	21.5	3.3	3.3	0.2						7.2
R-HSA-8956320	No	No	Yes	0.1974	0		4.7	19.5	4.9	10.8		3.6	1	13.8		0.1	22.3		1.1	0.4		7.3			2.2	5.2	3.1
R-HSA-8956321	Yes	Yes	Yes	0.1737	0			25.4		12	6.4			10.6	3.4			26.1		6.1		5.9		4.2
R-HSA-8957275	Yes	Yes	Yes	0.1751	0			4.9		32.4		0.3	4.7		8.2			23.4		4.9			6.8	2.3		12.1
R-HSA-8957322	No	No	No	0.0196	0.0205			54.5			45.5
R-HSA-8963899	No	No	No	0.0662	0	3.5	0.2	31.3	1.5			12.7	8.2		2.8			29.7						10.1
R-HSA-8964038	No	No	Yes	0.337	0		5.9	38.1	3.2	26.1			0.8				7.7	4.2	1.9			0		2.8	2.1	4.9	2.2
R-HSA-8964043	No	No	Yes	0.1929	0	2.1	6.1	28.5	7.2	31		0.7	3.4	1			5.6		3.9	4.1	3			3.5
R-HSA-8964315	No	No	Yes	0.2977	0.0585			47.6				5.7					19.4	27.3
R-HSA-8964539	Yes	Yes	Yes	0.2549	0			42						5.9	1.4			48.4						2.5
R-HSA-8964616	No	No	Yes	0.2772	0			47.8	0.6	9.4		4.7				4.7	20.1	12		0.7
R-HSA-8978868	Yes	Yes	Yes	0.2632	0.049			26.4		18.4				10.1	10.8	0.7	5.5	20.2		3.2			0	4.7
R-HSA-8978934	No	No	Yes	0.175	0			47.2	3.8	10.8	22.9							12.5								2.9
R-HSA-8979227	No	No	Yes	0.3471	0	1.7	5.3	36.7	2.2	25	0.8	1.9	1	2	0.9	4.8	8.4		1.5	1.7		1		5.2
R-HSA-8982491	No	No	Yes	0.1593	0			36.4		3.9					10.2	22.9	3									2.1	21.5
R-HSA-8983432	No	No	Yes	0.2682	0.1796			22		31.8	1.3		7.2	13.8	5.6	2.4			0.9	1.9			1.6			11.5
R-HSA-8984722	No	No	No	0.0063	0			15.2	22.6	15.8								26.3							20.1
R-HSA-8986944	Yes	Yes	Yes	0.1259	0				1.4	19.3	25.4			20.3	10.6			13.6		1.7		6		1.7
R-HSA-9005891	Yes	Yes	Yes	0.3138	0		3.7	28.3		1.8	19.7				8.3		25.6	12.3				0.2
R-HSA-9005895	Yes	Yes	Yes	0.3138	0		3.7	28.3		1.8	19.7				8.3		25.6	12.3				0.2
R-HSA-9006115	No	No	Yes	0.2271	0			40.1		2.8				5.3	9.2			34.1						8.6
R-HSA-9006335	No	No	No	0.0998	0	2		24.8	2.6	17.1	13.4	0.8	0.4	14.1	5.2	10.1	1.6			3.8			3.9
R-HSA-9006921	No	No	No	0.0569	0		1.9	7		8.8	7.8		9.5	10	11.7		2.3	8.2	0.6	7.8			2.2	0.8	3.4	6.4	11.6
R-HSA-9006925	Yes	Yes	Yes	0.3013	0			31.3		3.1	13.8		2.8		12.2		17.9	18.9
R-HSA-9006927	No	No	Yes	0.1206	0	2.3	2	27.6	4.9	24.4	5.5		0.2	8.8	2		12.8	5.6		2.4			0.5	0.8
R-HSA-9006931	No	No	Yes	0.1488	0			30.6	3.2	28.1	10.2			8.7	4.5	5.5						5.2		4
R-HSA-9006934	No	No	No	0.0561	0	6.8		17.8	2	11.8	8.8	1.8	1.8	12.8	1.9	10.9	7.8	1	0.7	3			1.2		1	1.1	7.7
R-HSA-9006936	No	No	Yes	0.2101	0	0.9	1.1	12.9	4.4	24.7	10.3	0.3	5	12.7	5.2		4.3	3.9	2.9	1.3	0.5		4.9	4.6
R-HSA-9007101	No	No	Yes	0.1318	0			31.3		7	5.8		2.7	5.7		3.5	15.7	1.7				5.8			2.2	6	12.6
R-HSA-9008059	No	No	Yes	0.2432	0	8.3		8.3	0.7	14.7		2.9	1.3	17.3	5.2	10	17.7	4.3	2.2	4.1			1.2	1.8
R-HSA-9009391	No	No	Yes	0.2307	0	0.9	1.5	22.8	4.8	15.4	8.1	2.2	0.2	10.5	3.8	5.3	8.7		2.1		2			5.2	2.1	0.9	3.5
R-HSA-901032	Yes	Yes	No	0.0612	0				11.5	3.3	22.6			7.2	3.9					13.6				37.9
R-HSA-901042	No	Yes	Yes	0.3057	0			46.9		7.7	2.3	1.9		5.4	6.7	4.5	2.6	11.9		6.6				3.6
R-HSA-9010553	No	No	Yes	0.2022	0			43.2		16.9		4.2				9	10.7						3.2			4	8.9
R-HSA-9012852	No	No	No	0.0487	0			39.1		37.1	23.8
R-HSA-9013507	No	No	No	0	0
R-HSA-9013508	No	No	No	0.0351	0	0		46.4		45.7	5.9											2
R-HSA-9013694	No	No	No	0	0
R-HSA-9013695	No	No	No	0.0635	0			37.3		27.2	20.3			5.8	0.3							9.2
R-HSA-9013700	Yes	Yes	Yes	0.1238	0			3		17.9	18.3		2.9	6	1.4		26.7	5		13.8							5.1
R-HSA-9013973	No	No	No	0	0
R-HSA-9014325	No	No	Yes	0.1057	0				7.2	28.9	14.7		6.3	8				15.7		6.2	6			6.8
R-HSA-9018519	No	No	No	0.0822	0	2.3			0.2	29.4	14.3			17	22.5			2				1.5		10.7
R-HSA-9018677	No	No	Yes	0.2315	0.1072			39.8		2			4	11.4	17.9		4.3	18						2.6
R-HSA-9018678	No	No	Yes	0.2399	0.1541	1.1		45.6					1.4	10.9	13.4		8	10.2		5.8				3.6
R-HSA-9020558	No	No	No	0.0913	0					16.7		4.5	4.7		7.4		22.2		3.9	4.7				12.4		20.6	2.9
R-HSA-9020591	No	No	Yes	0.1894	0			45.1		24.7	7							10.7			3.4	0.8			2.9	4.8	0.6
R-HSA-9020702	Yes	Yes	Yes	0.1125	0		0.9	8.6	5.3	20.6	8			19.6	12.2			10.7		4.1	3.6		6.4
R-HSA-9020933	No	No	Yes	0.1105	0.1067			44								18.1	19.9	1.1						4.7	0.6		11.7
R-HSA-9020956	No	No	No	0.0102	0			5.4	62.1																32.5
R-HSA-9022692	Yes	Yes	Yes	0.1341	0.1351			1.3	3.2	20.1	23.9			14.2	6.3		9.5	14.9		1.4			2.6	2.5
R-HSA-9022699	No	No	Yes	0.2624	0					29.7	15.8		2.1	21.6	15.3	0.5		10	0.6	0.7		3.8
R-HSA-9027276	No	No	Yes	0.1796	0	6.7		28	1.1	13.6	8.2	2.1		9.9	1.1	12.4	5.9			0.5		2.8			2.6	2.1	2.9
R-HSA-9027284	No	No	Yes	0.1073	0	3.5		28.7	1.7		3.2			13.4		4.4	29.8								4.2		11
R-HSA-9028731	No	No	No	0.0549	0				2.6	24.2		4.4		1.8	1.6	6.3		21.9						37.2
R-HSA-9033241	No	No	No	0	0
R-HSA-9033658	No	No	Yes	0.2873	0			54.3		3.8	2.2	1.5				21.1		14.2		2.2		0.6
R-HSA-9034015	No	No	Yes	0.1991	0			37.6		5.2	3.4				8.3		11.5	26.8		2.2				5
R-HSA-9037629	No	No	Yes	0.2871	0			54.4		3.7	2.2	1.4				21.1		14.3		2.3		0.7
R-HSA-909733	Yes	Yes	Yes	0.166	0.1207			4.1			36.1	5		19.7	13.9					7.9	8			2.2		3.2
R-HSA-912446	No	No	No	0.0948	0		4.4	36.9	2.4	31.2	1.7	2.7	2.9			9.6			5.8					2.4
R-HSA-912526	No	No	Yes	0.1652	0			21.9	1.4	22.9	4.2		8.7	10.5	4.2	6.9	0.9			3.1			4.7			8.7	1.8
R-HSA-912631	No	No	No	0.0508	0				1.1	14	15.4		4	13.7	12		2.7	11.6	6.6	8.8		0.3	9.9
R-HSA-912694	No	No	Yes	0.1073	0			25			17	14		21.2	9.4				7.6	1.2	4.7
R-HSA-913531	Yes	Yes	Yes	0.1437	0						43.3	7.8		22.6	11.1					8.6	6.4
R-HSA-913709	No	No	Yes	0.3534	0	3	2.5	38.2	0.7	30.9				7			12.7					1.8	0.2			2.9
R-HSA-917729	No	No	No	0.0512	0.0222	1.9		44.3	2					10.2	3.8			29.6		3.7			3.3	1.3
R-HSA-917937	Yes	Yes	Yes	0.1268	0	8.7		18		23	3.1			15.1	6.1			25.6	0.2
R-HSA-917977	Yes	Yes	Yes	0.1899	0	4.5		27.1		17.1				13.8	7.5			24.6		2.2				3.2
R-HSA-918233	No	No	No	0.0133	0			48.6				36.6							14.9
R-HSA-927802	No	No	Yes	0.2261	0.1351			41.8		12.2	0.2	6.7				10.8	12.8			1.5			1.5			3.2	9.1
R-HSA-933541	No	No	No	0.0273	0			61				20.1					15		3.8
R-HSA-933542	Yes	Yes	Yes	0.1986	0		4.9	30.6	0.9		9.3	8.5		10	18.2		2.7	11.3	0.6	2.1	0.8
R-HSA-933543	No	No	No	0.0949	0			43.7			2.5	28.6		4.3	2.9	8.2	6.2		0.6	2.9
R-HSA-936440	No	No	Yes	0.1819	0.0403	1.5	3.3	8.6	0.1	8.5	7.8	0.5	4.5	3.8	4.3	2.1	1.7	4	0.9	2.7	20.8	1.1	18.2	5.7
R-HSA-936837	Yes	Yes	Yes	0.1899	0			19.1	3.9	10.2	10.9	1.3		18.5	10.5			14.2		1			4.3	5.9
R-HSA-936964	Yes	Yes	Yes	0.1444	0			29.6		8.9				6.8	10.5		17.4	12.1	14.7
R-HSA-937039	No	No	No	0	0
R-HSA-937041	No	No	No	0.096	0	1.8		16.7	13.2		10.6	1.3		8.7			6.4		16.4					7.4	9	4.5	3.9
R-HSA-937042	No	No	Yes	0.1099	0				7	28.9	14.4		6.5	9				15		6.3	6.4			6.3
R-HSA-937061	Yes	Yes	Yes	0.2936	0		3.9	37.4	5.7						6.3		20.8	10.1	0.8	0.2				3.8	2.5	0.8	7.7
R-HSA-937072	Yes	Yes	Yes	0.1527	0			37.7	2.3					7.1	9.9		11.8	14.7	16.4
R-HSA-948021	No	No	Yes	0.111	0	2.9		40.2	2.4			14		18.7	16.8			0	1.8	1.9				1.4
R-HSA-9603798	No	No	Yes	0.1705	0			37.6							13.1			32.1			12.1			5.2
R-HSA-9604323	No	No	No	0.0694	0			29.8	6.3	25.6	12.3			15.4								10.7
R-HSA-9607240	No	No	Yes	0.1242	0			21.7	12	2.4	6.1		9.5	8.7	12.7	10.4		13.6					2.8
R-HSA-9609507	No	No	Yes	0.2094	0			49.4		34.7				3.1			9.9						2.9
R-HSA-9609523	No	No	Yes	0.1487	0		5.2	35.2		37.6			0.4					9		1.5			2.3			6.9	1.9
R-HSA-9609736	No	No	Yes	0.1154	0		0.9	35.8		10.9								35.2					0.8	4	3.8		8.6
R-HSA-9612973	No	No	No	0.033	0			31.6	14.5					12.5				19.7					4.7	16.9
R-HSA-9613354	Yes	Yes	Yes	0.1246	0					23.3	25.7			22.1	2.8					15.9				10.2
R-HSA-9613829	No	No	No	0	0
R-HSA-9614085	No	No	Yes	0.1532	0	1.4	1.4	18.1	2.2	24.4	12.2	0.3		12.7	7.1		7.4	2.5		3.6	1.7			4.9
R-HSA-9614399	No	No	Yes	0.1854	0.0004		5.5	19.4	4.1	7.4	17.5			15.1	23.3			2.4						5.4
R-HSA-9614657	No	No	Yes	0.2338	0			49.3		28.6	14.6						0.3	7.1
R-HSA-9615017	Yes	Yes	Yes	0.1353	0		4.3	13.4		25	20			12.9	5.6	2.5		4	0.9	4.7	5.7			1
R-HSA-9615710	No	No	No	0.0686	0			35.2	5.4					4.2	1.1			16.7		9.9				20.8	6.7
R-HSA-9616222	No	No	No	0.0725	0			24.1			3.7	2.5		1.3				15.1	27.6					5.5		20.1
R-HSA-9617324	Yes	Yes	Yes	0.1478	0					4.3	32						42.3	3.7							3.2	14.5
R-HSA-9617629	No	No	Yes	0.1224	0			31.8		32.7	19.2			9	0.8					0.8		5.6
R-HSA-9617828	Yes	Yes	Yes	0.1394	0	0.9	1.5	12.8	3.7	23.6	12.7	1.8	0.8	12.4	4.6	0.4	3.9	6		3.5	5.6			5.7
R-HSA-9619229	No	No	No	0.0925	0.084	4.6	6.5	13.7		12.1	7.4	2.6			11.1		9.2	9.4		9.7					4.1		9.7
R-HSA-9619483	No	No	No	0.0656	0		1.8	23.8										44.8						3.9	2		23.7
R-HSA-9620244	No	No	No	0.0313	0				7.3				24.2					68.4
R-HSA-9627069	No	No	Yes	0.1556	0	1.5	0.9	25.9	6	12.4	0.9	3.8		2.9	2.5	10.8	10.3	2.2	1.1					9.5		3	6.4
R-HSA-9634600	No	No	Yes	0.2304	0			42.8		16.7		1.1			8	0.5	16.2			6.3			1			1.5	5.8
R-HSA-9634638	No	No	Yes	0.1811	0			15.2	5.9	17.2	12.2	2		12.2	10.7	5.2	3.1	0.2			3.1			6.9	0.7		5.4
R-HSA-975110	No	No	No	0.0167	0				19.4		42.5						12.4		25.7
R-HSA-975138	Yes	Yes	Yes	0.2981	0		4	42.1	3.2						7.8		22	13.5						0.5	0.4		6.5
R-HSA-975144	No	No	No	0	0
R-HSA-975155	Yes	Yes	Yes	0.301	0		4	42.3	3.2						8.3		21.7	13.7						0.2	0.2		6.3
R-HSA-975163	Yes	Yes	Yes	0.1538	0			37.7	2.2					7	9.9		12.1	14.6	16.5
R-HSA-975576	Yes	Yes	Yes	0.2326	0					21.7	14.8			19.2	6.8			8.6	6.1	8.6	1.6			4.1		8.2	0.3
R-HSA-975577	Yes	Yes	Yes	0.3075	0			5.7		19.8	14.6	1		17.1	10.4	6.7		7.7	4.9	5.9		2.4				1.8	2.2
R-HSA-975634	Yes	Yes	No	0.0444	0													100
R-HSA-975871	No	No	Yes	0.2676	0		4.1	40.9	3.4						6.2		23.4	9.9						3.7	0.1		8.3
R-HSA-975956	No	No	Yes	0.2234	0.1546			41.5		13	0.1	6.6				11	11.7			1.5			1.8			3.6	9.3
R-HSA-975957	No	No	Yes	0.2261	0.1351			41.8		12.2	0.2	6.7				10.8	12.8			1.5			1.5			3.2	9.1
R-HSA-977068	Yes	Yes	Yes	0.3547	0	2.1			3.7	27.2	0.5	8.2		0.4		13.7	5.4	4.7	4.5	11.1				4.7	1.8	0.6	11.4
R-HSA-977225	Yes	Yes	Yes	0.109	0	3.4		3.5		18.3	10.3			7.9	11.1			32.2					0.4	12.8
R-HSA-977443	No	No	Yes	0.3145	0	1	3.4	36.6	2.6	16.3		3.7		7.1	1.6	3.9	16.3	3.6	1.1				0.7	2
R-HSA-977444	No	No	Yes	0.3139	0	2	3.3	36.7	2.5	16.6		4.1		6.7	1.1	2.8	15.5	4.4	1.2				0.9	2.4
R-HSA-977606	No	No	No	0.0318	0						7.7				22.1	30		40.3
R-HSA-982772	Yes	Yes	Yes	0.1797	0.0903			52.7		11.4		1		3.7	3.6	9	6.8	11.8
R-HSA-983168	No	No	Yes	0.1241	0					19.7	17.3	8.6				15.9		24.7						13.9
R-HSA-983169	No	No	Yes	0.1043	0						52.9			26.1		15.4					5.6
R-HSA-983170	No	No	Yes	0.1166	0		7	37.5		23	0.6				8	1.9		8.6		3.4	7.2	0.4		2.4
R-HSA-983189	No	No	Yes	0.1441	0	8.7	2.6	29		28.7	6.4	0.8	1.3	1.4		7.8		5.7		4.2			0.5	2.9
R-HSA-983231	No	No	Yes	0.1435	0			33	1.2	32.8		9.1	1.5			3.9	6						1.3	1.8	2.1	2.3	4.9
R-HSA-983695	No	No	Yes	0.2743	0.0865		5.1	18.4	1.7	5.2			8			52.2	2.4	7.1
R-HSA-983705	No	No	Yes	0.2627	0		2.3	41.3					1.5			51										0.1	3.8
R-HSA-983712	No	No	Yes	0.1999	0			29.9	0.9		2.1		4.6			21.9	6.4	2			1	3				9.2	19
R-HSA-991365	No	No	Yes	0.3139	0	2	3.3	36.7	2.5	16.6		4.1		6.7	1.1	2.8	15.5	4.4	1.2				0.9	2.4
R-HSA-997272	No	No	Yes	0.3825	0	6.2	5.6	33.3	1.6	16.6	0.2	2	0.1	3.9	3.5	0.1	9.3	7.8	3.6	1			1.3	3.9

## Sheet: Reactome Validation
Pathway	Replicated	DE in validation	Validation adjR2 > 0,1	Validation adjR2	Validation to discovery adjR2	Basophils	CD15highCD16neg_Eosinophils	CD15lowCD16high_Neutrophils	CD15posCD14low_LDGs	CD14highCD16neg_classicalMonocytes	CD14posCD16pos_intermediateMonocytes	CD14lowCD16pos_nonclassicalMonocytes	CD56high_CD16low_NK	CD56low_CD16high_NK	CD3posCD56pos_NklikeTcells	CD19pos_Bcells	CD4pos_Tcells	CD8pos_Tcells	CD8pos_CD4pos_Tcells	CD8neg_CD4neg_Tcells	mDC1	mDC2	CD1cneg_CD141neg_mDC	pDC	HCQ	IS	DCS
R-HSA-1059683	No	No	No	0.0921	0			17						3.8	16.6	28.5											34.1
R-HSA-109581	Yes	Yes	Yes	0.2333	0		5.7				26.1	7.4		25.5			18.8			5				11.4
R-HSA-109582	No	No	No	0.0886	0			48.6	3.9						8.6		22.6	11.1						5.1
[truncated: 1,274 more rows]

## Sheet: RNA Discovery
Gene ID	Replicated	DE in discovery	Discovery adjR2 > 0.1	Discovery adjR2	Discovery to validation adjR2	Basophils	CD15highCD16neg_Eosinophils	CD15lowCD16high_Neutrophils	CD15posCD14low_LDGs	CD14highCD16neg_classicalMonocytes	CD14posCD16pos_intermediateMonocytes	CD14lowCD16pos_nonclassicalMonocytes	CD56high_CD16low_NK	CD56low_CD16high_NK	CD3posCD56pos_NklikeTcells	CD19pos_Bcells	CD4pos_Tcells	CD8pos_Tcells	CD8pos_CD4pos_Tcells	CD8neg_CD4neg_Tcells	mDC1	mDC2	CD1cneg_CD141neg_mDC	pDC	HCQ	IS	DCS
[truncated: 15,224 more rows]

[truncated: 1 more sheets: RNA Validation]
